# Supplementary material for: Probing structural requirements for thiazole-based mimetics of sunitinib as potent VEGFR-2 inhibitors
Source: Royal Society of Chemistry journal article supplement (doi:10.1039/d4md00754a), 2025-01-01
Supplement: d4md00754a1.pdf [file d4md00754a1.pdf]

## Probing the Structural Requirements for Thiazole-Based Mimetics of Sunitinib as Potent VEGFR-2 Inhibitors

Alaa A. Abd Elhameed<sup>a\*</sup>, Ahmed R. Ali<sup>a\*</sup>, Hazem A. Ghabbour<sup>a</sup>, Said M. Bayomi<sup>a</sup>,  
Nadia S. El-Gohary<sup>a\*</sup>

<sup>a</sup> Department of Medicinal Chemistry, Faculty of Pharmacy, Mansoura University, Mansoura 35516, Egypt

\*Corresponding author: dr.alaadmc@yahoo.com, dr.nadiaelgohary@yahoo.com,  
ahmed\_reda5588@mans.edu.eg

### Biological screening

***In vitro* antitumor testing against HepG2, HCT-116, MCF-7, HeP-2 and Hela cancer cell lines, and cytotoxicity against WI38 and WISH normal cell lines**

### Materials

#### *Cell lines*

Liver (HepG2), colon (HCT-116), breast (MCF-7), larynx (HeP-2) and cervix (Hela) cancer cell lines as well as lung fibroblast (WI38) and amnion epithelial (WISH) normal cell lines were obtained from American Type Culture Collection (ATCC) *via* Holding Company for Biological Products and Vaccines (VACSERA), Cairo, Egypt.

#### *Chemical reagents*

The reagents, Roswell Park Memorial Institute (RPMI-1640) medium, 3-(4,5-dimethylthiazol-2-yl)-2,5-diphenyltetrazolium bromide (MTT), DMSO, doxorubicin and sunitinib were obtained from Sigma-Aldrich co., St. Louis, USA. Fetal bovine serum was obtained from GIBCO, UK.

### Procedure

Compounds **3-6** and **8-11** were screened for their *in vitro* antitumor activity against HepG2, HCT-116, MCF-7, HeP-2 and Hela cancer cell lines. In addition, compounds **3a,b**, **6g**, **8a** and **10c** were screened for their *in vitro* cytotoxicity against WI38 and WISH normal cell lines adopting MTT assay [1-3], and using doxorubicin, sunitinib as reference antitumor agent. Cells were cultured in Roswell Park Memorial Institute (RPMI) 1640 medium with 10% fetal bovine serum, penicillin (100 units/mL) and streptomycin (100 µg/mL) at 37 °C in an atmosphere of

5% CO<sub>2</sub> were added. Cells were placed in 96-multiwell microtiter plates (10<sup>4</sup> cells/well) for 24 hours at 37 °C and in an atmosphere of 5% CO<sub>2</sub> before treatment with the compounds to allow attachment of the cells to the wall of the plate. The tested compounds were dissolved in DMSO and diluted with phosphate buffer saline (PBS) to obtain different concentrations. Tested compounds of different concentrations were added to each well and cells were incubated with the compounds for 48 hours at 37 °C and in atmosphere of 5% CO<sub>2</sub>. All tests were performed in triplicates. The treated cells were washed with PBS and 100 μL of 3-(4,5-dimethylthiazol-2-yl)-2,5-diphenyltetrazolium bromide solution (MTT) (5 mg/mL MTT stock in PBS diluted to 1 mg/mL with 10% RPMI-1640 medium) was added. The 96-multiwell plates were read by microarray reader Perkinelmer vector 3V multilabel counter model 1420 (Perkinelmer, Boston, MA) for optical density at 490 nm [1-3]. The relative percentage cell viability was calculated from the following equation:

$$\% \text{ Cell viability} = \frac{A_{\text{treated cells}} - A_{\text{blank}}}{A_{\text{untreated cells}} - A_{\text{blank}}} \times 100$$

The relation between surviving fraction and drug concentration is plotted to get the survival curve for HepG2, HCT-116, MCF-7, HeP-2 and Hela cancer cell lines, and WI38 and WISH normal cell lines. The concentration required for 50% inhibition of cell viability (IC<sub>50</sub>/μM) was obtained for each compound from the curve fitting using Sigma plot10.

### ***In vitro* kinase inhibition assay against VEGFR-2 for compounds 3a,b, 6g, 8a and 10c**

*In vitro* kinase inhibition assay was carried out against VEGFR-2 using ELISA kit (Cat. # 40325, BPS Bioscience, USA). The procedure of the used kits was done according to the manufacturer's instructions. Briefly, compounds **3a,b**, **6g**, **8a** and **10c** and control drug, sunitinib, were made to different serial dilution. 5x kinase buffer 1, ATP and PTK substrate poly (Glu:Tyr 4:1) (10 mg/mL) were thawed. After that, the master mixture [N wells x (6 μl 5x kinase buffer 1 + 1 μl ATP (500 μM) + 1 μl PTK substrate Poly (Glu:Tyr 4:1) (10 mg/mL)+ 17 μl water)] was prepared followed by addition of 25 μl to every well. Then, 5 μl of inhibitor solution was added to each well and labeled as "test inhibitor". For the "positive control" and "blank wells", 5 μl of the same solution without inhibitor (inhibitor buffer) was added. 3 mL of 1x kinase buffer 1 was prepared by mixing 600 μl of 5x kinase buffer 1 with 2400 μl water was prepared. To the wells designated as "blank", 20 μl of 1x kinase buffer 1 was added. VEGFR-2

enzyme was thawed on ice. Upon first thaw, tube containing enzyme was spinned briefly to recover full content of the tube. The amount of VEGFR-2 required for the assay was calculated and the enzyme was diluted to 1 ng/ $\mu$ l with 1x kinase buffer 1. The reaction was initiated by adding 20  $\mu$ l of diluted VEGFR-2 enzyme to the wells designated “positive control” and "test inhibitor control" and incubated at 30°C for 45 minutes. Kinase-Glo Max reagent was thawed. After the 45 minutes, 50  $\mu$ l of Kinase-Glo Max reagent was added to each well. The plate was covered with aluminum foil and incubated at room temperature for 15 minutes. The luminescence was measured using the microplate reader. The values of % activity versus different concentrations of the test compound (with semi-log decrease in concentration) were then plotted using nonlinear regression analysis of sigmoidal dose-response curve, and the concentration that induces 50% inhibition of activity (IC<sub>50</sub>) of VEGFR-2 were determined [4,5].

## **Cell cycle analysis and induction of apoptosis**

### *Flow cytometry analysis of DNA content for cell cycle*

HCT-116, MCF-7 and HeLa cancer cells ( $2 \times 10^5$  cells/well) were treated with different concentrations of compound **10c**, and incubated for 24 hours at 37 °C in an atmosphere of 5% CO<sub>2</sub>. The cells were washed twice with ice-cold PBS, collected by centrifugation, and fixed in ice-cold 70% ethanol, washed with PBS, and then they were incubated with propidium iodide (PI) staining solution that contains 50  $\mu$ g/mL PI, 0.1 mg/mL RNase A and 0.05% Triton X-100. After incubation for 1 hour at room temperature, the cells were analyzed in the dark at 37 °C by flow cytometry (Becton Dickinson FACS, San Jose, CA) [6,7]. The cell cycle distributions were determined using Cell-Quest software.

### *Analysis of cellular apoptosis*

Annexin V-fluorescein isothiocyanate (Annexin V-FITC) is a protein that possesses high affinity to phosphatidyl serine (PS), which can be detected by staining with annexin V-FITC and counter staining with propidium iodide (PI). Apoptosis was initially induced by incubation of cells in a density of  $4 \times 10^6$  cells/well in 100  $\mu$ L of complete growing medium with addition of the tested compound **10c** (100  $\mu$ L) in 96-microwell plates for 24 hours. Then,  $0.5 \times 10^6$  cells were collected by centrifugation and resuspended in 500  $\mu$ L of binding buffer. Annexin V-FITC (5  $\mu$ L) along with PI (5  $\mu$ L) were added, and incubated in the dark for 5 minutes at room temperature. Analysis of annexin-V-FITC binding was performed by flow cytometry (Becton Dickinson FACS, San Jose, CA) [6,7].

### ***Caspase3/9 assay***

The level of human caspase-3 was assessed using ELISA kit that was obtained from Invitrogen INC. Catalog # KHO1091 (Invitrogen, Inc., Waltham, Massachusetts, USA) in accordance with the manufacturer instructions. Also, human caspase-9 ELISA kit was obtained from DRG International, INC. Catalog # EIA-4860 (DRG International, Inc., Mountain Avenue Springfield, USA) in accordance with the manufacturer instructions. The tested compound **10c** (10  $\mu$ M) was added to the cells and lysed with cell extraction buffer. After incubation at room temperature for 2 hours, wells were washed 4 times with the wash buffer, followed by addition of 100  $\mu$ L of Invitrogen caspase-3 (active) or caspase-9 monoclonal antibody solution and incubated again at room temperature for another 1 hour. Wells were washed 4 times with the wash buffer, the anti-rabbit IgG horseradish peroxidase (HRP) solution (100  $\mu$ L) was added, and the wells were incubated for 30 minutes at room temperature. After washing 4 times with the wash buffer, stabilized chromogen was added. Later on, the stop solution (100  $\mu$ L) was added after incubation for 30 minutes. Absorbance was measured at 450 nm [8].

### ***In vivo antitumor activity of compound 10c***

*In vivo* antitumor screening was conducted after fulfillment of ethical statement and approval protocol for animal study from research ethical committee, Faculty of Pharmacy, Mansoura University. Evaluation of the *in vivo* antitumor activity of compound **10c** was achieved using EAC solid tumor animal model [9]. Twenty five swiss albino eight-week female mice (weighing 20-25 g) were obtained and divided into three groups (n = 5). Group 1: positive control-received equivalent volume of physiological saline; group 2: treated intraperitoneally with compound **10c** (10 mg/kg); group 3: treated intraperitoneally with doxorubicin (2 mg/kg). 7,12-Dimethylbenz[a]anthracene was used to induce breast cancer in mice. All groups were injected intraperitoneally one dose per day in a period of 20 days. Monitoring of the body weight and tumor volumes of mice was done every five days, the volume of solid tumor was monitored using a digital Vernier caliper and was calculated using the following equation:

$$\text{Tumor volume (mm}^3\text{)} = \text{Length(mm)} \times [\text{Height(mm)}]^2 \times 0.52$$

Tumor growth inhibition (%TGI) was calculated after 5,10,15 and 20 days by the formula:



$$\%TGI = \frac{1 - \frac{(T_t/T_0)}{(C_t/C_0)}}{1 - \frac{C_0}{C_t}} \times 100$$

Where:

T<sub>t</sub> = median tumor volume of treated group at time t.

T<sub>0</sub> = median tumor volume of treated group at time 0.

C<sub>t</sub> = median tumor volume of control group at time t.

C<sub>0</sub> = median tumor volume of control group at time 0.

At the end of the experiment, mice were sacrificed and tumors were excised, fixed in 10 % formalin solution, and embedded in paraffin.

## Molecular modeling study

The molecular modeling calculations were done applying swiss dock online server [10-12]. The 3D poses was visualized by UCSF chimera software [13-15] and the 2D poses were visualized by ProteinsPlus structure-based modeling support server [16-19]. The most stable conformer of the newly synthesized analogs **3a,b**, **6g**, **8a** and **10c** was docked into the binding pocket of VEGFR-2 (PDB code: 4agd) [20,21] which was obtained from the Protein Data Bank (PDB).

## HPLC purity testing

The HPLC purity for compounds **3b**, **6g**, **8a** and **10c** was tested using Knauer high performance liquid chromatography apparatus with variable-wavelength UV-visualization detector operated at 240 nm. The mixture was separated using a shim-pack cyano column (150 mm x 4.6 mm, 5µm particle size). The composition of the mobile phase was Methanol: phosphate buffer (50: 50, v/v) adjusted at pH 4, and programmed at flow rate of 1 mL/min with UV detection at 240 nm. Filtration of the mobile phase was carried out through 0.45 µm millipore membrane filter. Separation was performed after sonication of the mobile phase for 10 min to remove air bubbles. All determinations were performed at ambient temperature.

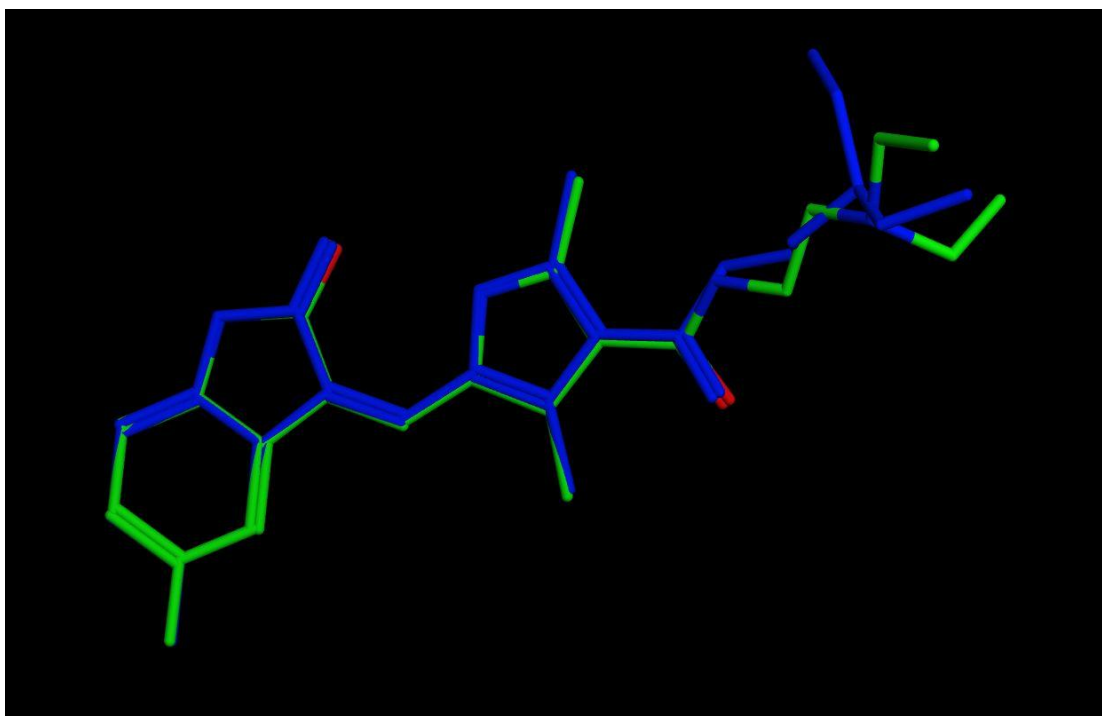

**Figure S1.** Superimposition of the co-crystallized sunitinib (blue) and the re-docked sunitinib (green) in the VEGFR-2 active site (RMSD = 1.05 Å).

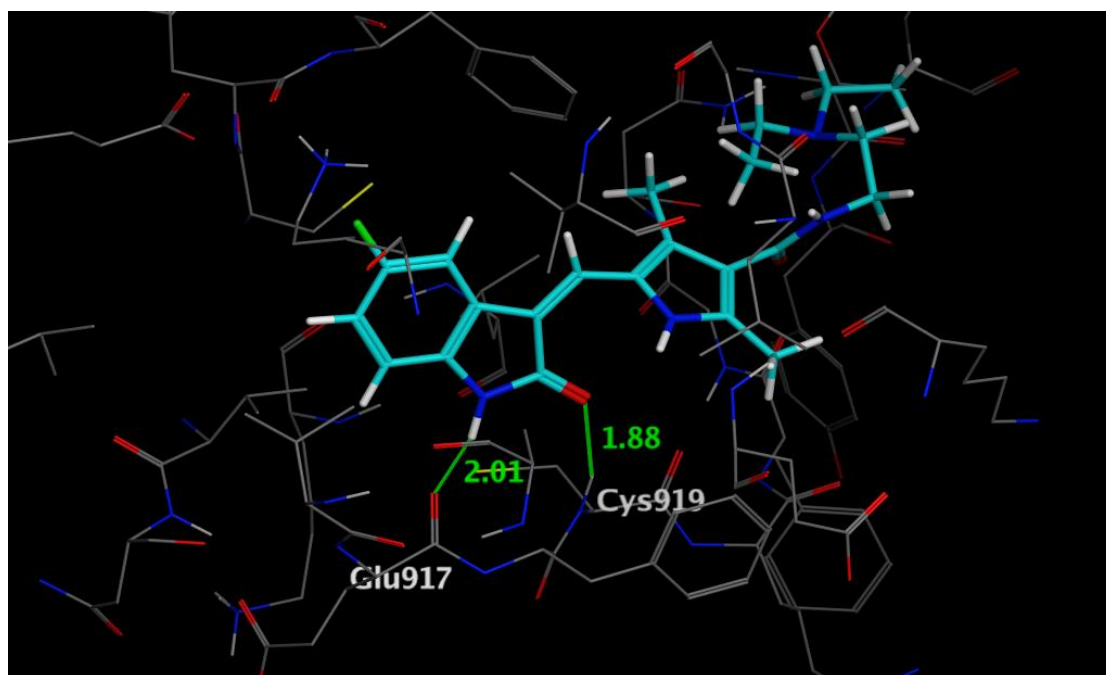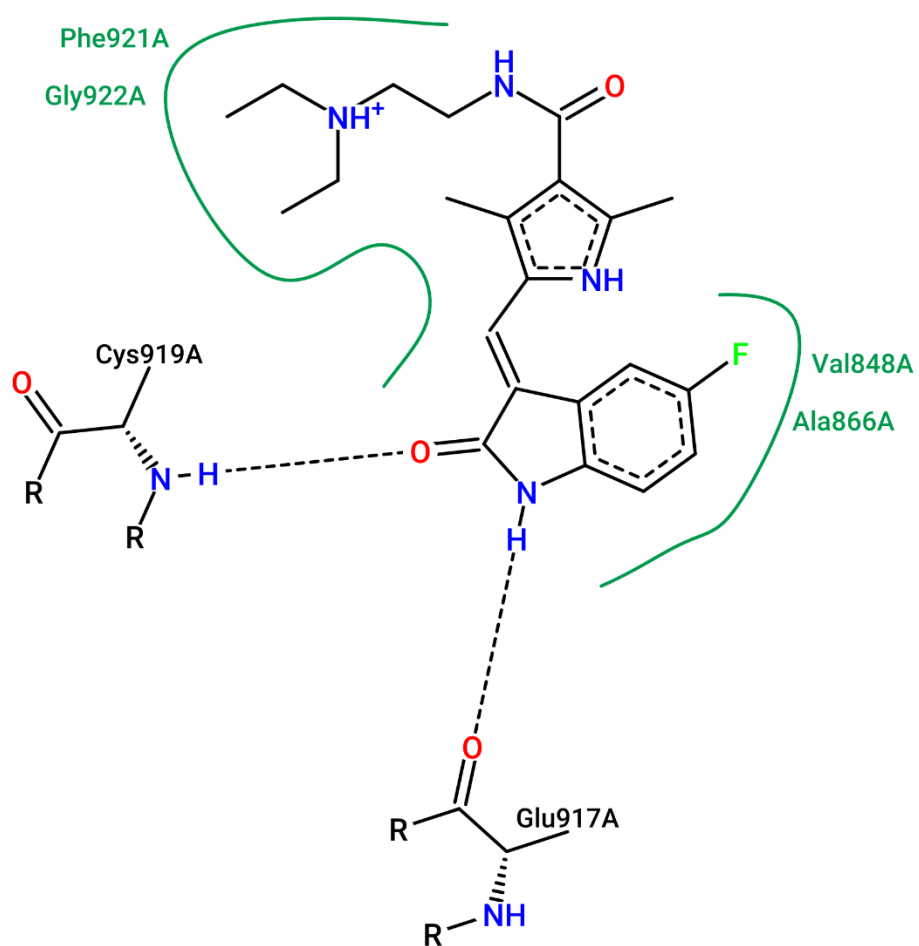

**Figure S2.** 3D and 2D Interaction pattern of sunitinib with the binding site of VEGFR-2.

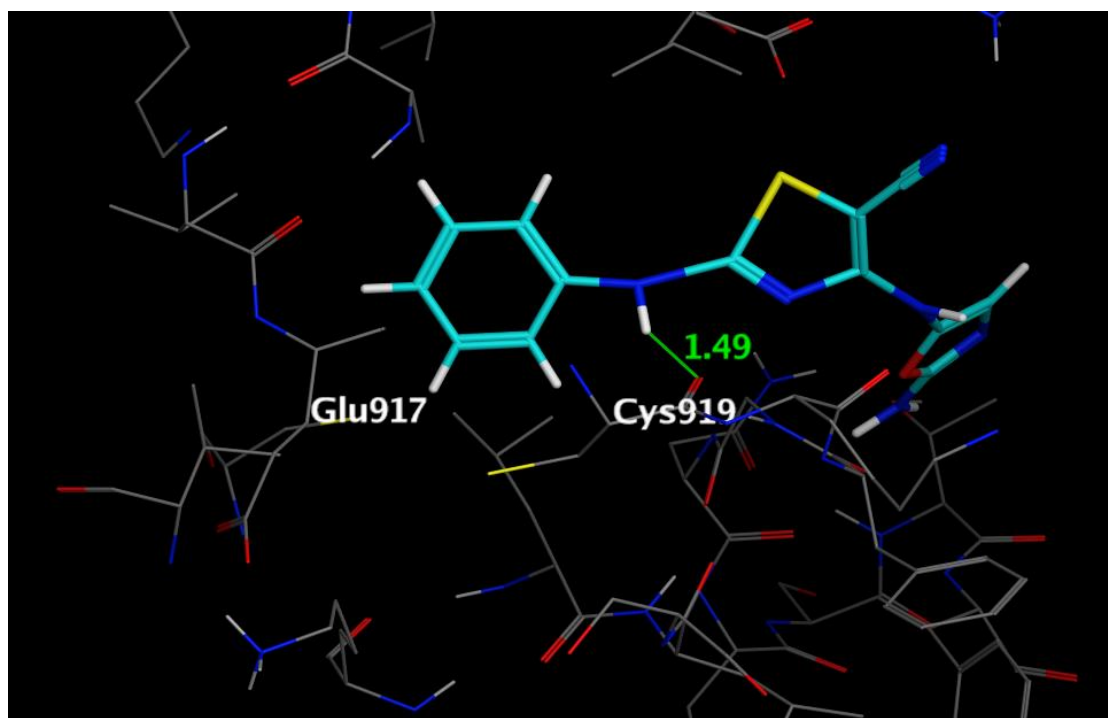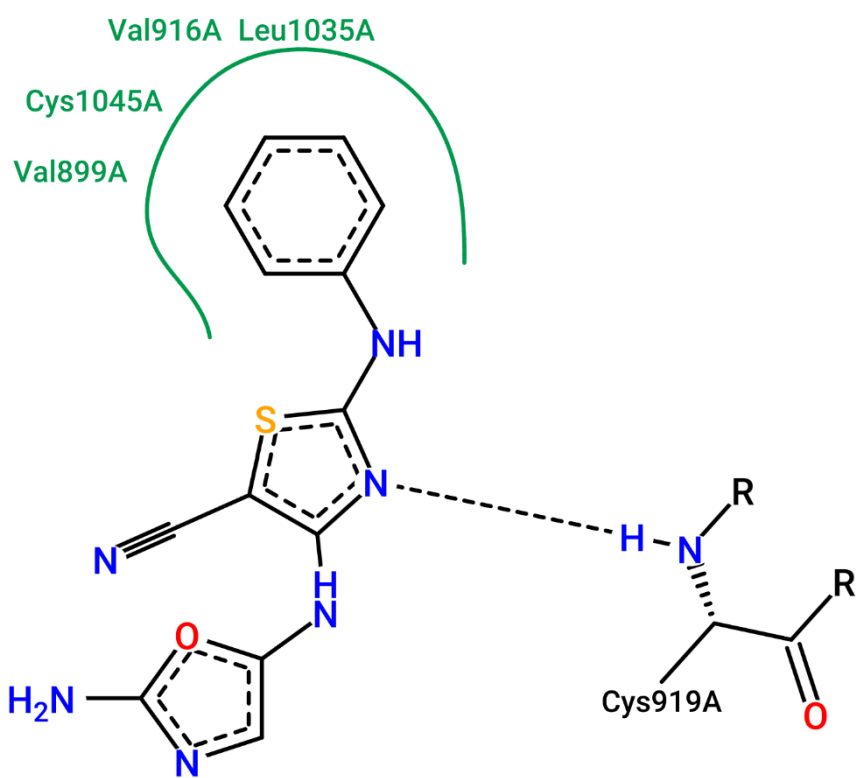

Figure S3. 3D and 2D Interaction pattern of compound 3a with the binding site of VEGFR-2.

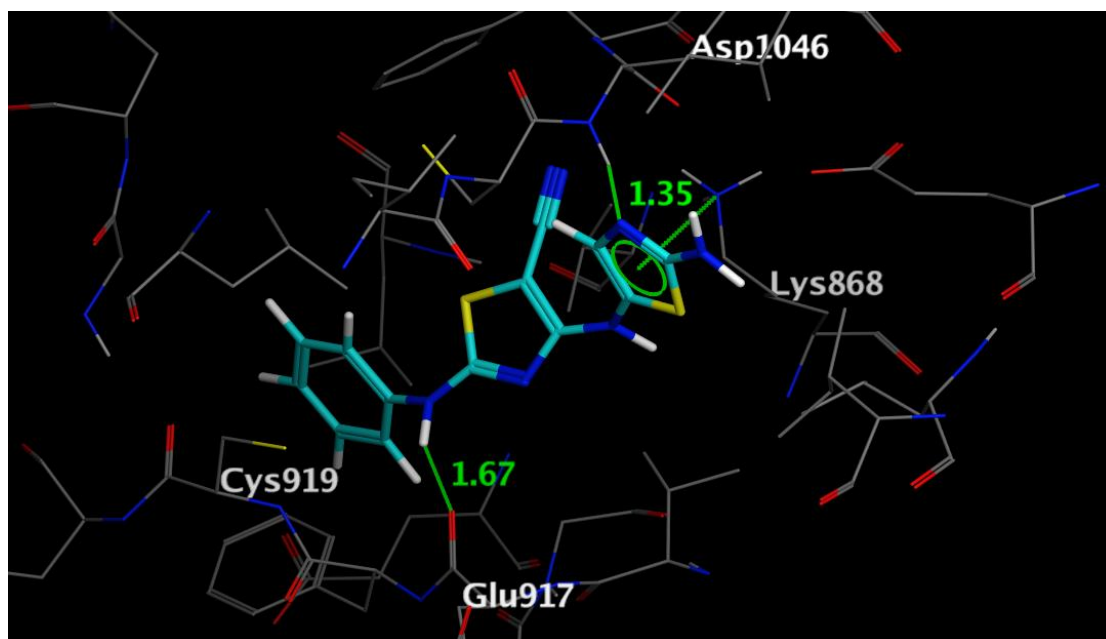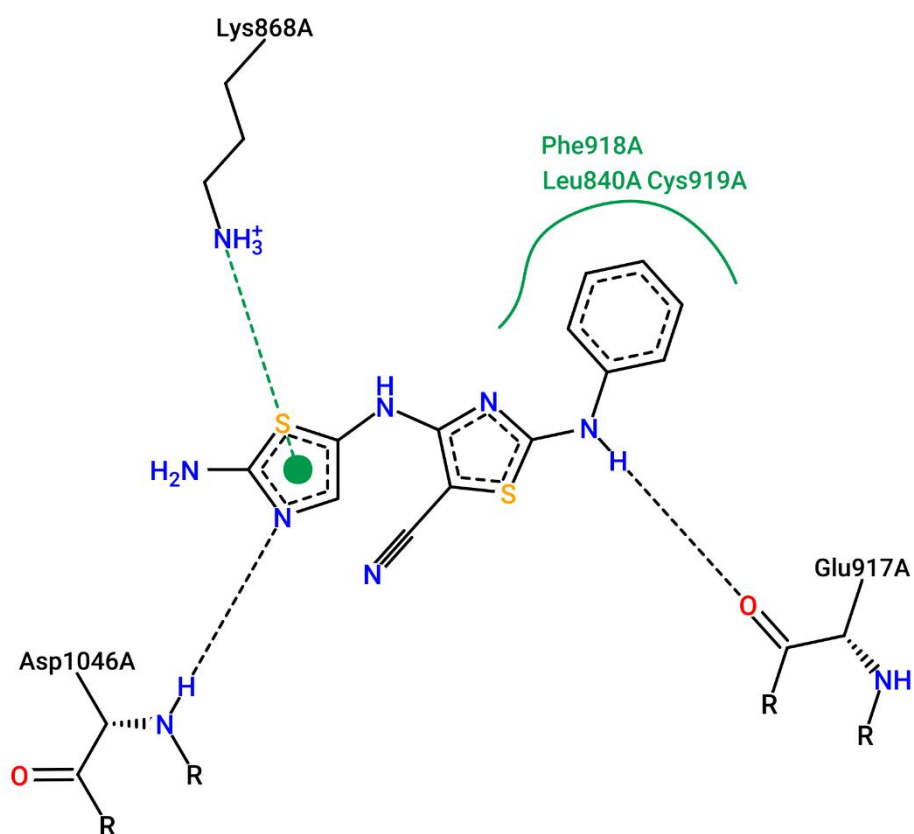

**Figure S4.** 3D and 2D Interaction pattern of compound **3b** with the binding site of VEGFR-2.

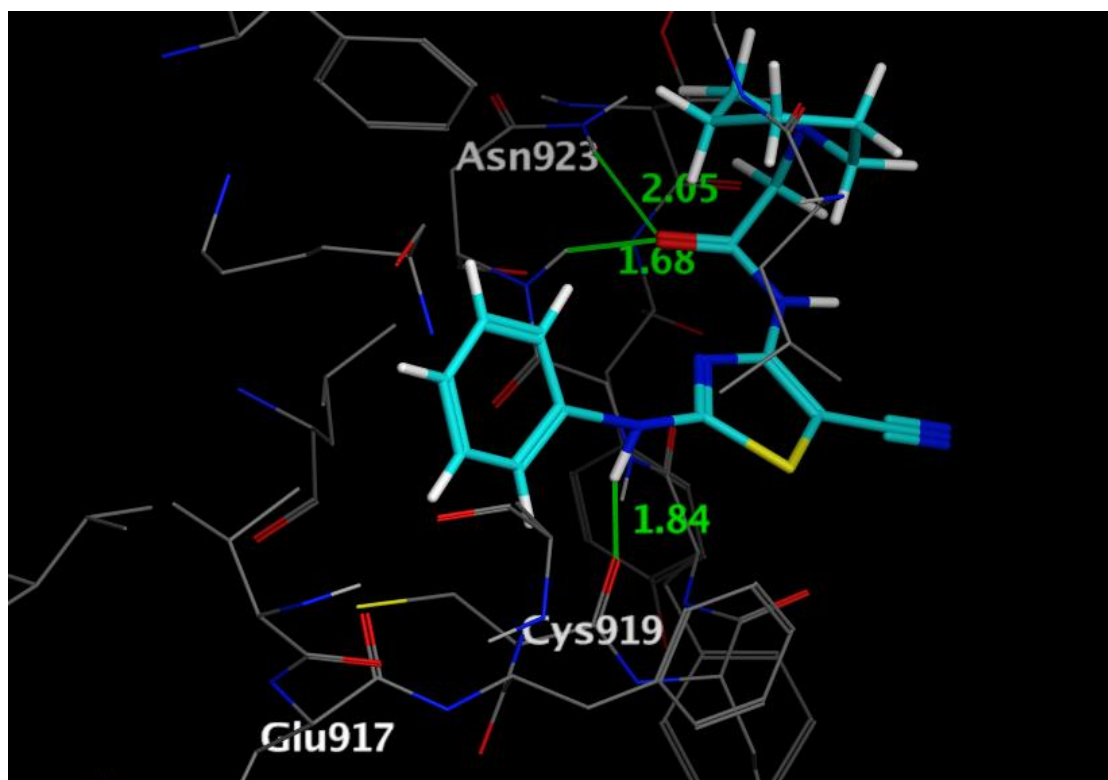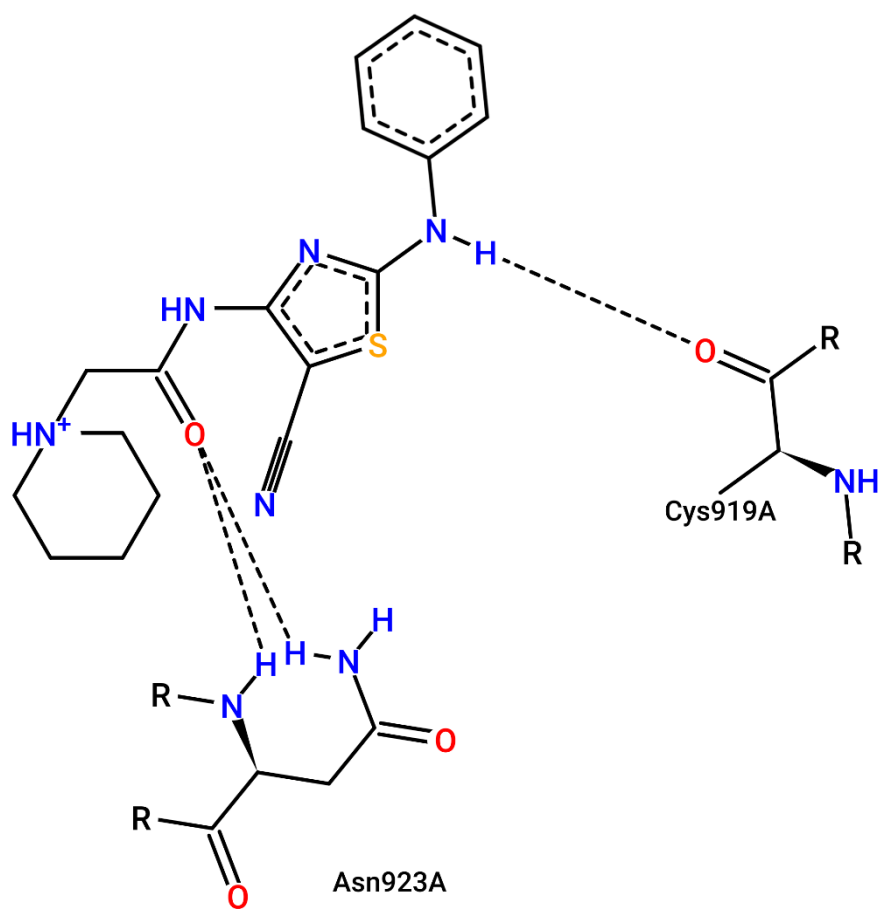

Figure S5. 3D and 2D Interaction pattern of compound 6g with the binding site of VEGFR-2.

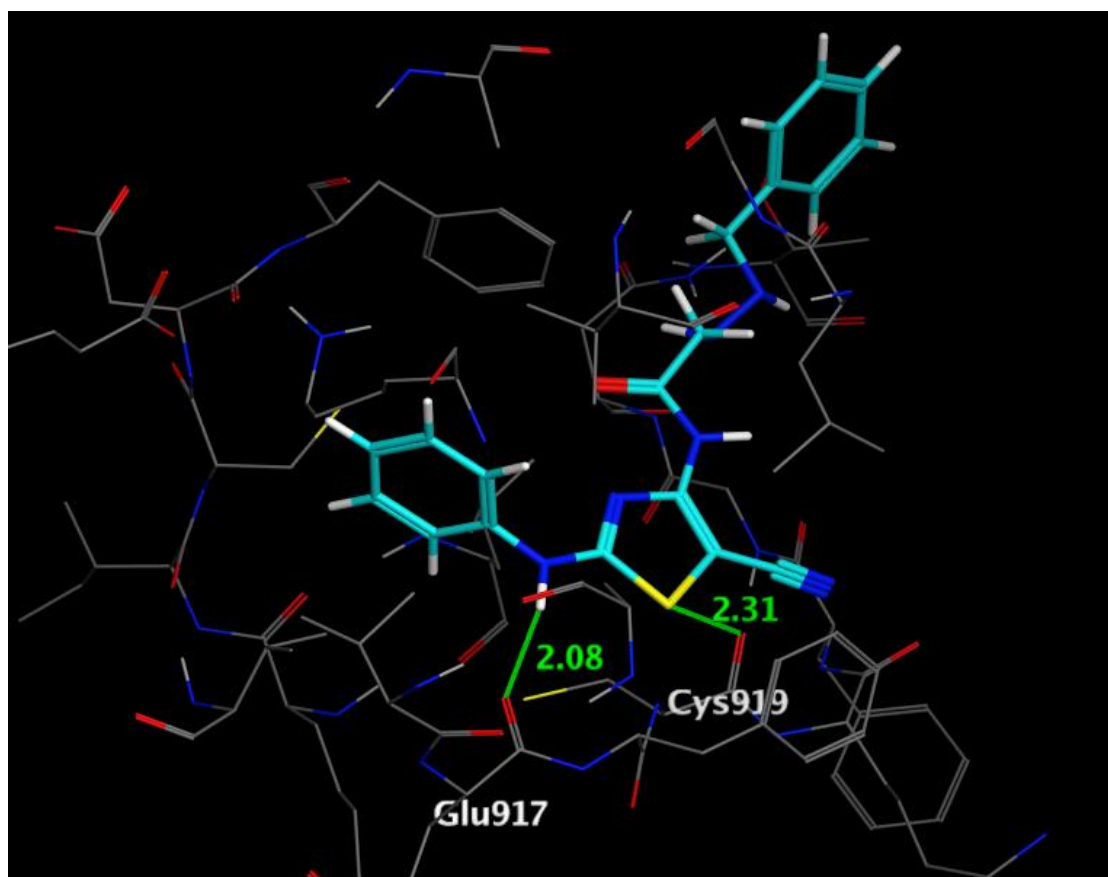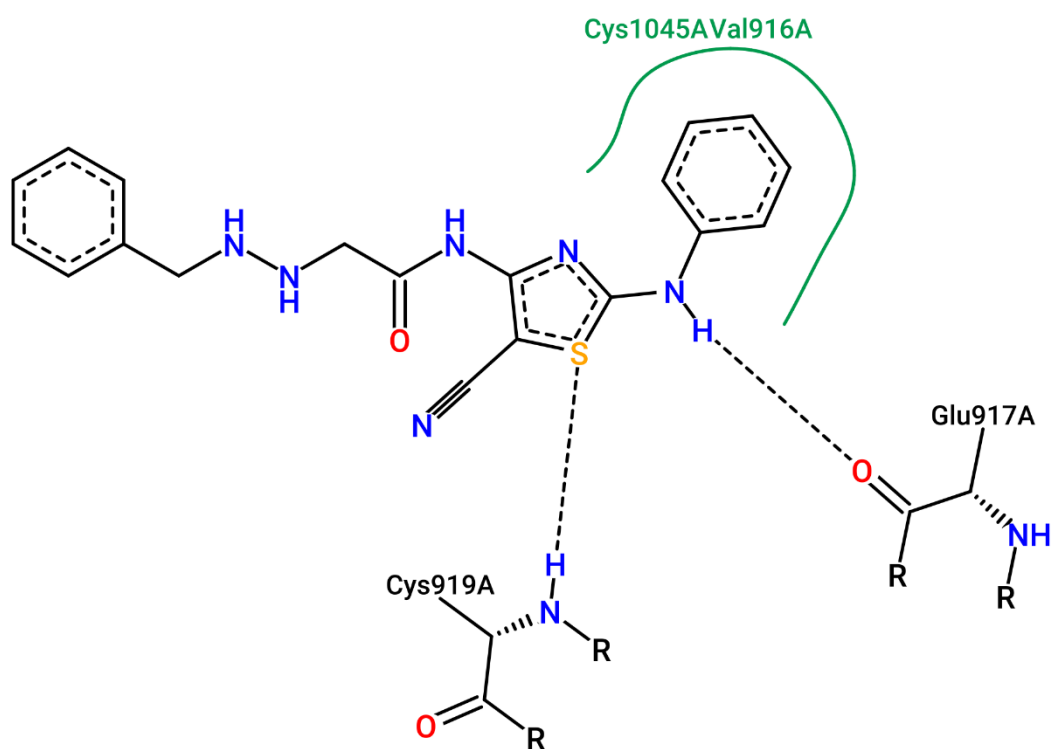

**Figure S6.** 3D and 2D Interaction pattern of compound **8a** with the binding site of VEGFR-2.

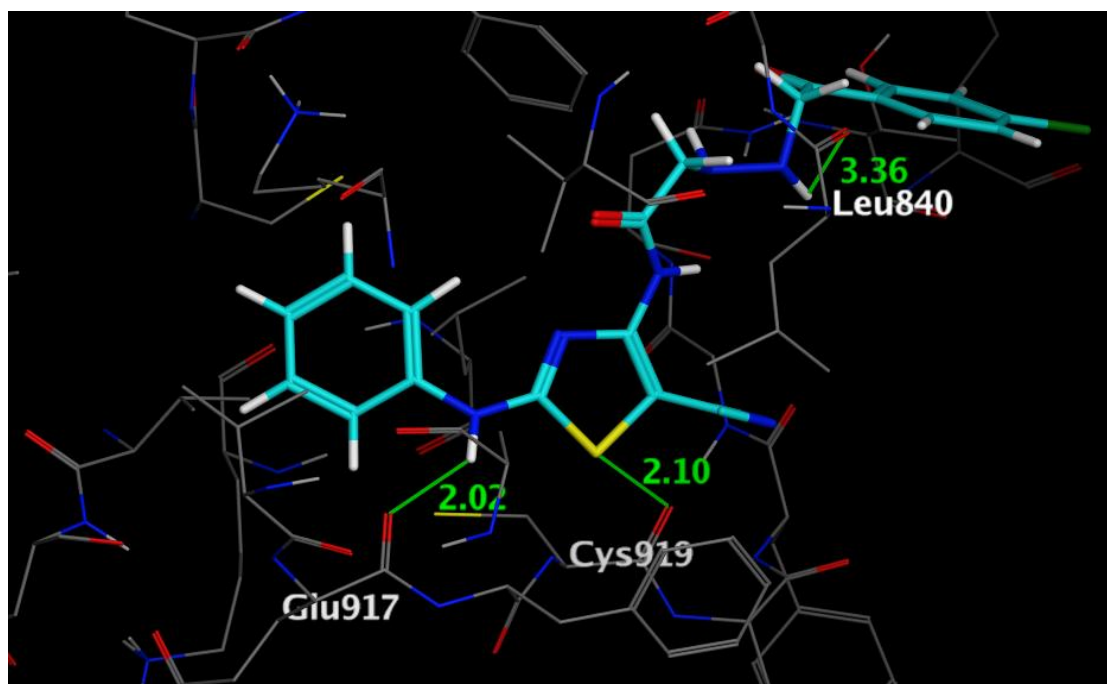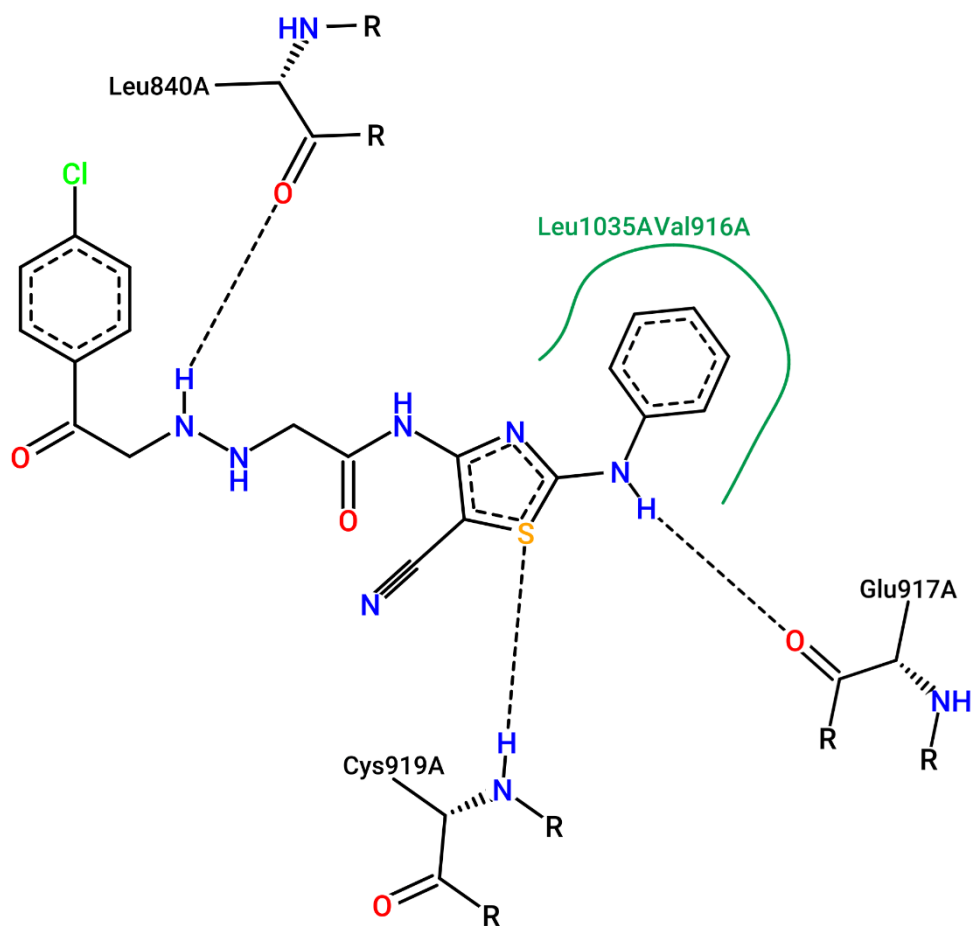

Figure S7. 3D and 2D Interaction pattern of compound 10c with the binding site of VEGFR-2.



**Table S1.** Body weight of mice for control, doxorubicin, and **10c**-treated groups at 0, 5, 10, 15 and 20 days of treatment.

| Group            | Body weight (g) |             |              |                |                 |
|------------------|-----------------|-------------|--------------|----------------|-----------------|
|                  | day 0           | day 5       | day 10       | day 15         | day 20          |
| Positive Control | 18.20±1.068     | 23.00±0.707 | 28.20±0.860  | 32.60±0.509    | 37.00±0.707     |
| Doxorubicin      | 20.00±0.707     | 21.60±0.927 | 24.40±1.030* | 26.40±0.979*** | 28.60±0.812**** |
| <b>10c</b>       | 19.20±0.734     | 23.00±1.140 | 27.00±0.948  | 30.20±0.583##  | 34.40±0.509*### |

Positive control: mice with cancer implants and receiving no drug.

\*\*\*\* p < 0.0001, \*\*\* p < 0.0005, \* p < 0.05 vs. Positive control group.

### p < 0.0005, ## p < 0.01 vs. doxorubicin group.

**Table S2.** Tumor volume of the mammary gland of mice for control, doxorubicin, and **10c**-treated groups at 0, 5, 10, 15 and 20 days of treatment.

| Group            | Tumor volume (mm <sup>3</sup> ) |                   |                 |                  |                  |
|------------------|---------------------------------|-------------------|-----------------|------------------|------------------|
|                  | day 0                           | day 5             | day 10          | day 15           | day 20           |
| Positive Control | 0.180±0.010                     | 0.680±0.039       | 1.322±0.151     | 2.250±0.129      | 3.078±0.160      |
| Doxorubicin      | 0.186±0.010                     | 0.268±0.010****   | 0.368±0.014**** | 0.484±0.016****  | 0.600±0.012****  |
| <b>10c</b>       | 0.188±0.010                     | 0.504±0.028****## | 0.680±0.050***  | 0.964±0.108****# | 1.024±0.088****# |

Positive control: mice with cancer implants and receiving no drug.

\*\*\*\* p < 0.0001, \*\*\* p < 0.001, \*\* p < 0.005 vs. Positive control group.

### p < 0.001, # p < 0.05 vs. doxorubicin group.

**Table S3.** % Tumor Growth Inhibition (%TGI) of breast solid tumor in mice after 5, 10, 15 and 20 days of treatment with doxorubicin and compound **10c**.

| <b>Group</b>       | <b>%TGI</b>  |               |               |               |
|--------------------|--------------|---------------|---------------|---------------|
|                    | <b>day 5</b> | <b>day 10</b> | <b>day 15</b> | <b>day 20</b> |
| <b>Doxorubicin</b> | 84.16        | 84.58         | 86.07         | 86.18         |
| <b>10c</b>         | 39.49        | 58.75         | 64.11         | 72.38         |

## References

- [1] T. Mosmann, Rapid colorimetric assay for cellular growth and survival: application to proliferation and cytotoxicity assays. *J. Immunol. Methods* 65 (1983) 55-63. [https://doi.org/10.1016/0022-1759\(83\)90303-4](https://doi.org/10.1016/0022-1759(83)90303-4).
- [2] F. Denizot, R. Lang, Rapid colorimetric assay for cell growth and survival. Modifications to the tetrazolium dye procedure giving improved sensitivity and reliability. *J. Immunol. Methods* 89 (1986) 271-277. [https://doi.org/10.1016/0022-1759\(86\)90368-6](https://doi.org/10.1016/0022-1759(86)90368-6).
- [3] D. Gerlier, N. Thomasset, Use of MTT colorimetric assay to measure cell activation. *J. Immunol. Methods* 94 (1986) 57-63. [https://doi.org/10.1016/0022-1759\(86\)90215-2](https://doi.org/10.1016/0022-1759(86)90215-2).
- [4] K. Sharma, P.S. Suresh, R. Mullangi, N.R. Srinivas, Quantitation of VEGFR2 (vascular endothelial growth factor receptor) inhibitors - review of assay methodologies and perspectives: Review of quantitation of VEGFR2 inhibitors, *Biomed. Chromatogr.* 29 (2015) 803-834. <https://doi.org/10.1002/bmc.3370>.
- [5] C. Fontanella, E. Ongaro, S. Bolzonello, M. Guardascione, G. Fasola, G. Aprile, Clinical advances in the development of novel VEGFR2 inhibitors, *Ann. Transl. Med.* 2 (2014) 123. <https://doi.org/10.3978/j.issn.2305-5839.2014.08.14>.
- [6] C. S. Devi, D. A. Kumar, S. S. Singh, N. Gabra, N. Deepika, Y. P. Kumar, S. Satyanarayana, Synthesis, interaction with DNA, cytotoxicity, cell cycle arrest and apoptotic inducing properties of ruthenium(II) molecular "light switch" complexes. *Eur. J. Med. Chem.* 64 (2013) 410-421. <https://doi.org/10.1016/j.ejmech.2013.04.006>.
- [7] K. K.-W. Lo, T. K.-M. Lee, J. S.-Y. Lau, W.-L. Poon, S.-H. Cheng, Luminescent biological probes derived from ruthenium(II) estradiol polypyridine complexes. *Inorg. Chem.* 47 (2008) 200-208. <https://doi.org/10.1021/ic701735q>.
- [8] P. D. Mace, S. J. Riedl, G. S. Salvesen, Caspase enzymology and activation mechanisms. *Methods Enzymol.* 544 (2014) 161-178. <https://doi.org/10.1016/B978-0-12-417158-9.00007-8>.
- [9] J. D. Bancroft, A. Stevens, D. R. Turner, Theory and practice of histological techniques, 4th ed., Churchill Livingstone, 1996.
- [10] A. Daina, V. Zoete, Application of the Swiss Drug Design online resources in virtual screening. *Int. J. Mol. Sci.* 20 (2019) Article ID: 4612. <https://doi.org/10.3390/ijms20184612>.
- [11] A. Grosdidier, V. Zoete, O. Michielin, SwissDock, a protein-small molecule docking web service based on EADock DSS. *Nucleic Acids Res.* 39 (2011) 270-277. <https://doi.org/10.1093/nar/gkr366>.
- [12] Molecular Modelling Group. <http://www.swissdock.ch/>.

- [13] C. C. Huang, E. C. Meng, J. H. Morris, E. F. Pettersen, T. E. Ferrin, Enhancing UCSF Chimera through web services. *Nucleic Acids Res.* 42 (2014) 478-484. <https://doi.org/10.1093/nar/gku377>.
- [14] E. F. Pettersen, T. D. Goddard, C. C. Huang, G.S. Couch, D. M. Greenblatt, E. C. Meng, T. E. Ferrin, UCSF Chimera-A visualization system for exploratory research and analysis. *J. Comput. Chem.* 25 (2004) 1605-1612. <https://doi.org/10.1002/jcc.20084>.
- [15] Extensible molecular modeling system. <https://www.cgl.ucsf.edu/chimera/>.
- [16] K. Schöning-Stierand, K. Diedrich, C. Ehrt, F. Flachsenberg, J. Graef, J. Sieg, P. Penner, M. Poppinga, A. Ungethüm, M. Rarey, ProteinsPlus: a comprehensive collection of web-based molecular modeling tools. *Nucleic Acids Res.* 50 (2022) 611-615. <https://doi.org/10.1093/nar/gkac305>.
- [17] K. Schöning-Stierand, K. Diedrich, R. Fährrolfes, F. Flachsenberg, A. Meyder, E. Nittinger, R. Steinegger, M. Rarey, ProteinsPlus: interactive analysis of protein-ligand binding interfaces. *Nucleic Acids Res.* 48 (2020) 48-53. <https://doi.org/10.1093/nar/gkaa235>.
- [18] R. Fährrolfes, S. Bietz, F. Flachsenberg, A. Meyder, E. Nittinger, T. Otto, A. Volkamer, M. Rarey, ProteinsPlus: a web portal for structure analysis of macromolecules. *Nucleic Acids Res.* 45 (2017) 337-343. <https://doi.org/10.1093/nar/gkx333>.
- [19] ProteinsPlus structure-based modeling support server. <https://proteins.plus/help/poseview>.
- [20] M. McTigue, Y. Deng, K. Ryan, A. Brooun, W. Diehl, A. Stewart, Crystal structure of vegfr2 (juxtamembrane and kinase domains) in complex with sunitinib (SU11248) (*N*-2-diethylaminoethyl)-5-((*Z*)-(5-fluoro-2-oxo-1*H*-indol-3-ylidene)methyl)-2,4-dimethyl-1*H*-pyrrole-3-carboxamide). (2012). <https://doi.org/10.2210/pdb4agd/pdb>.
- [21] M. McTigue, B. W. Murray, J. H. Chen, Y.-L. Deng, J. Solowiej, R. S. Kania, Molecular conformations, interactions, and properties associated with drug efficiency and clinical performance among VEGFR TK inhibitors. *Proc. Natl. Acad. Sci. U. S. A.* 109 (2012) 18281-18289. <https://doi.org/10.1073/pnas.1207759109>.

## السيد الأستاذ الدكتور / رئيس مجلس قسم الكيمياء الدوائية

تحية طيبة وبعد...

بناء على الخطاب الوارد من سيادتكم بشأن موافقة مجلس قسمكم الموقر في ٢٠٢٢/٨/١٠ علي الطلب المقدم من أ.د / سعيد محمد بيومي - المشرف الرئيسي علي رسالة الدكتوراه الخاصة بالصيدلانية / الاء عبدالله عبدالحمد محمد - المدرس المساعد بقسم الكيمياء الدوائية لإضافة جزء خاص بإجراء أبحاث علي الحيوان (الفران العملية) وكذلك تعديل عنوان الرسالة حتي يكون العنوان أكثر تحديدا ليتوافق مع ما تم تحضيره من مركبات وانجازه فعليا في خطة الرسالة.

عنوان الرسالة باللغة العربية والانجليزية قبل التعديل

تشبيد ودراسات حاسوبية لأنظمة نيتروجينية غير متجانسة جديدة متوقع لها فعالية بيولوجية

Synthesis and *in silico* studies of certain new nitrogenous heterocyclic systems of expected biological activity

عنوان الرسالة باللغة العربية والانجليزية بعد التعديل

"تصميم وتشبيد ودراسات حاسوبية لبعض مشتقات الثيازول ومشتقات الثيازول المدمجة الجديدة كمضادات محتملة للسرطان"

"Design, Synthesis and *in silico* studies of some new thiazole and fused thiazole derivatives as potential anticancer agents "

فان لجنة اخلاقيات البحث العلمي في اجتماعها بتاريخ ٢٠٢٢/٨/٢٤ قد احيطت علما بالتعديل الذي تم في عنوان الرسالة كما وافقت علي استمارة البحوث الحيوان المستوفاة بمعرفة وبتوقيع أ.د / المشرف الرئيسي وذلك بعد التأكد من توافق التجارب المقترحة مع معايير اخلاقيات البحث العلمي مع التزام المشرف الرئيسي بتقديم اسم الباحث الذي اجري جزء التجارب العملية علي الحيوان عند انتهاء البحث.

وتفضلوا سيادتكم بقبول وافر الاحترام والتقدير...

مقرر لجنة اخلاقيات البحث العلمي

أ.م.د / أمل احمد عطوه سلام

أ.م.د / أمل احمد عطوه سلام

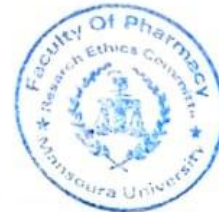

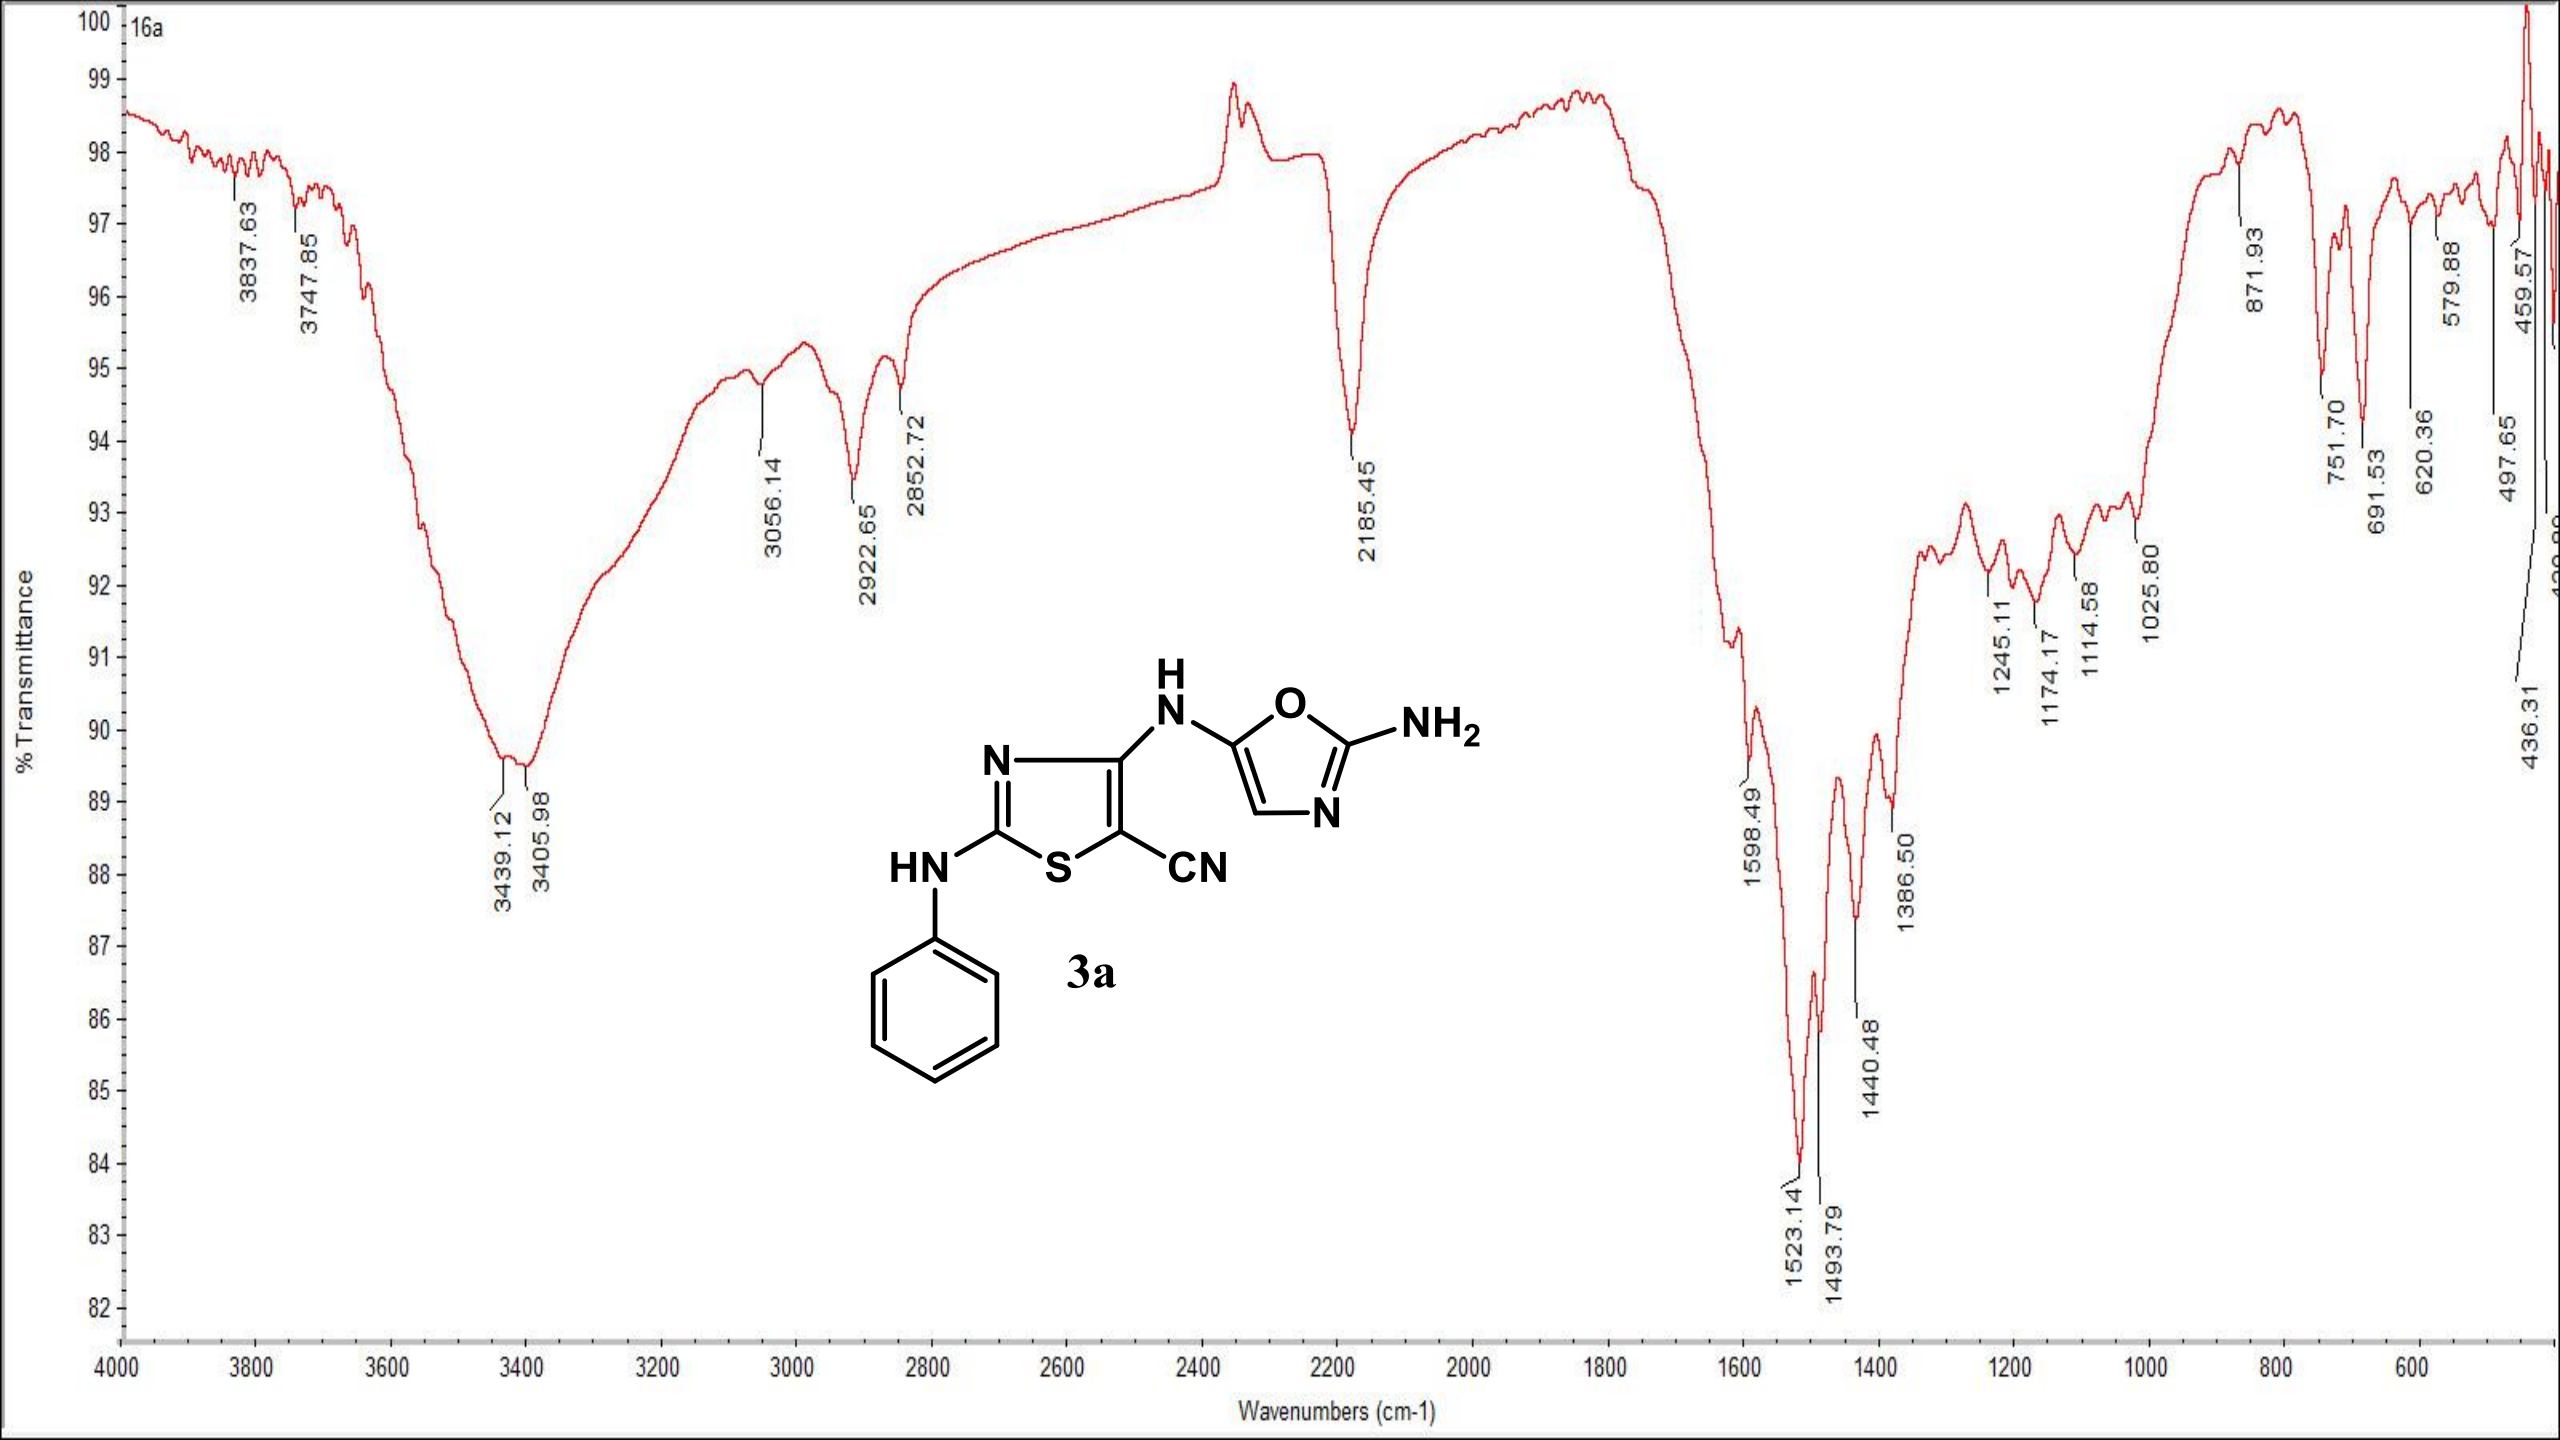

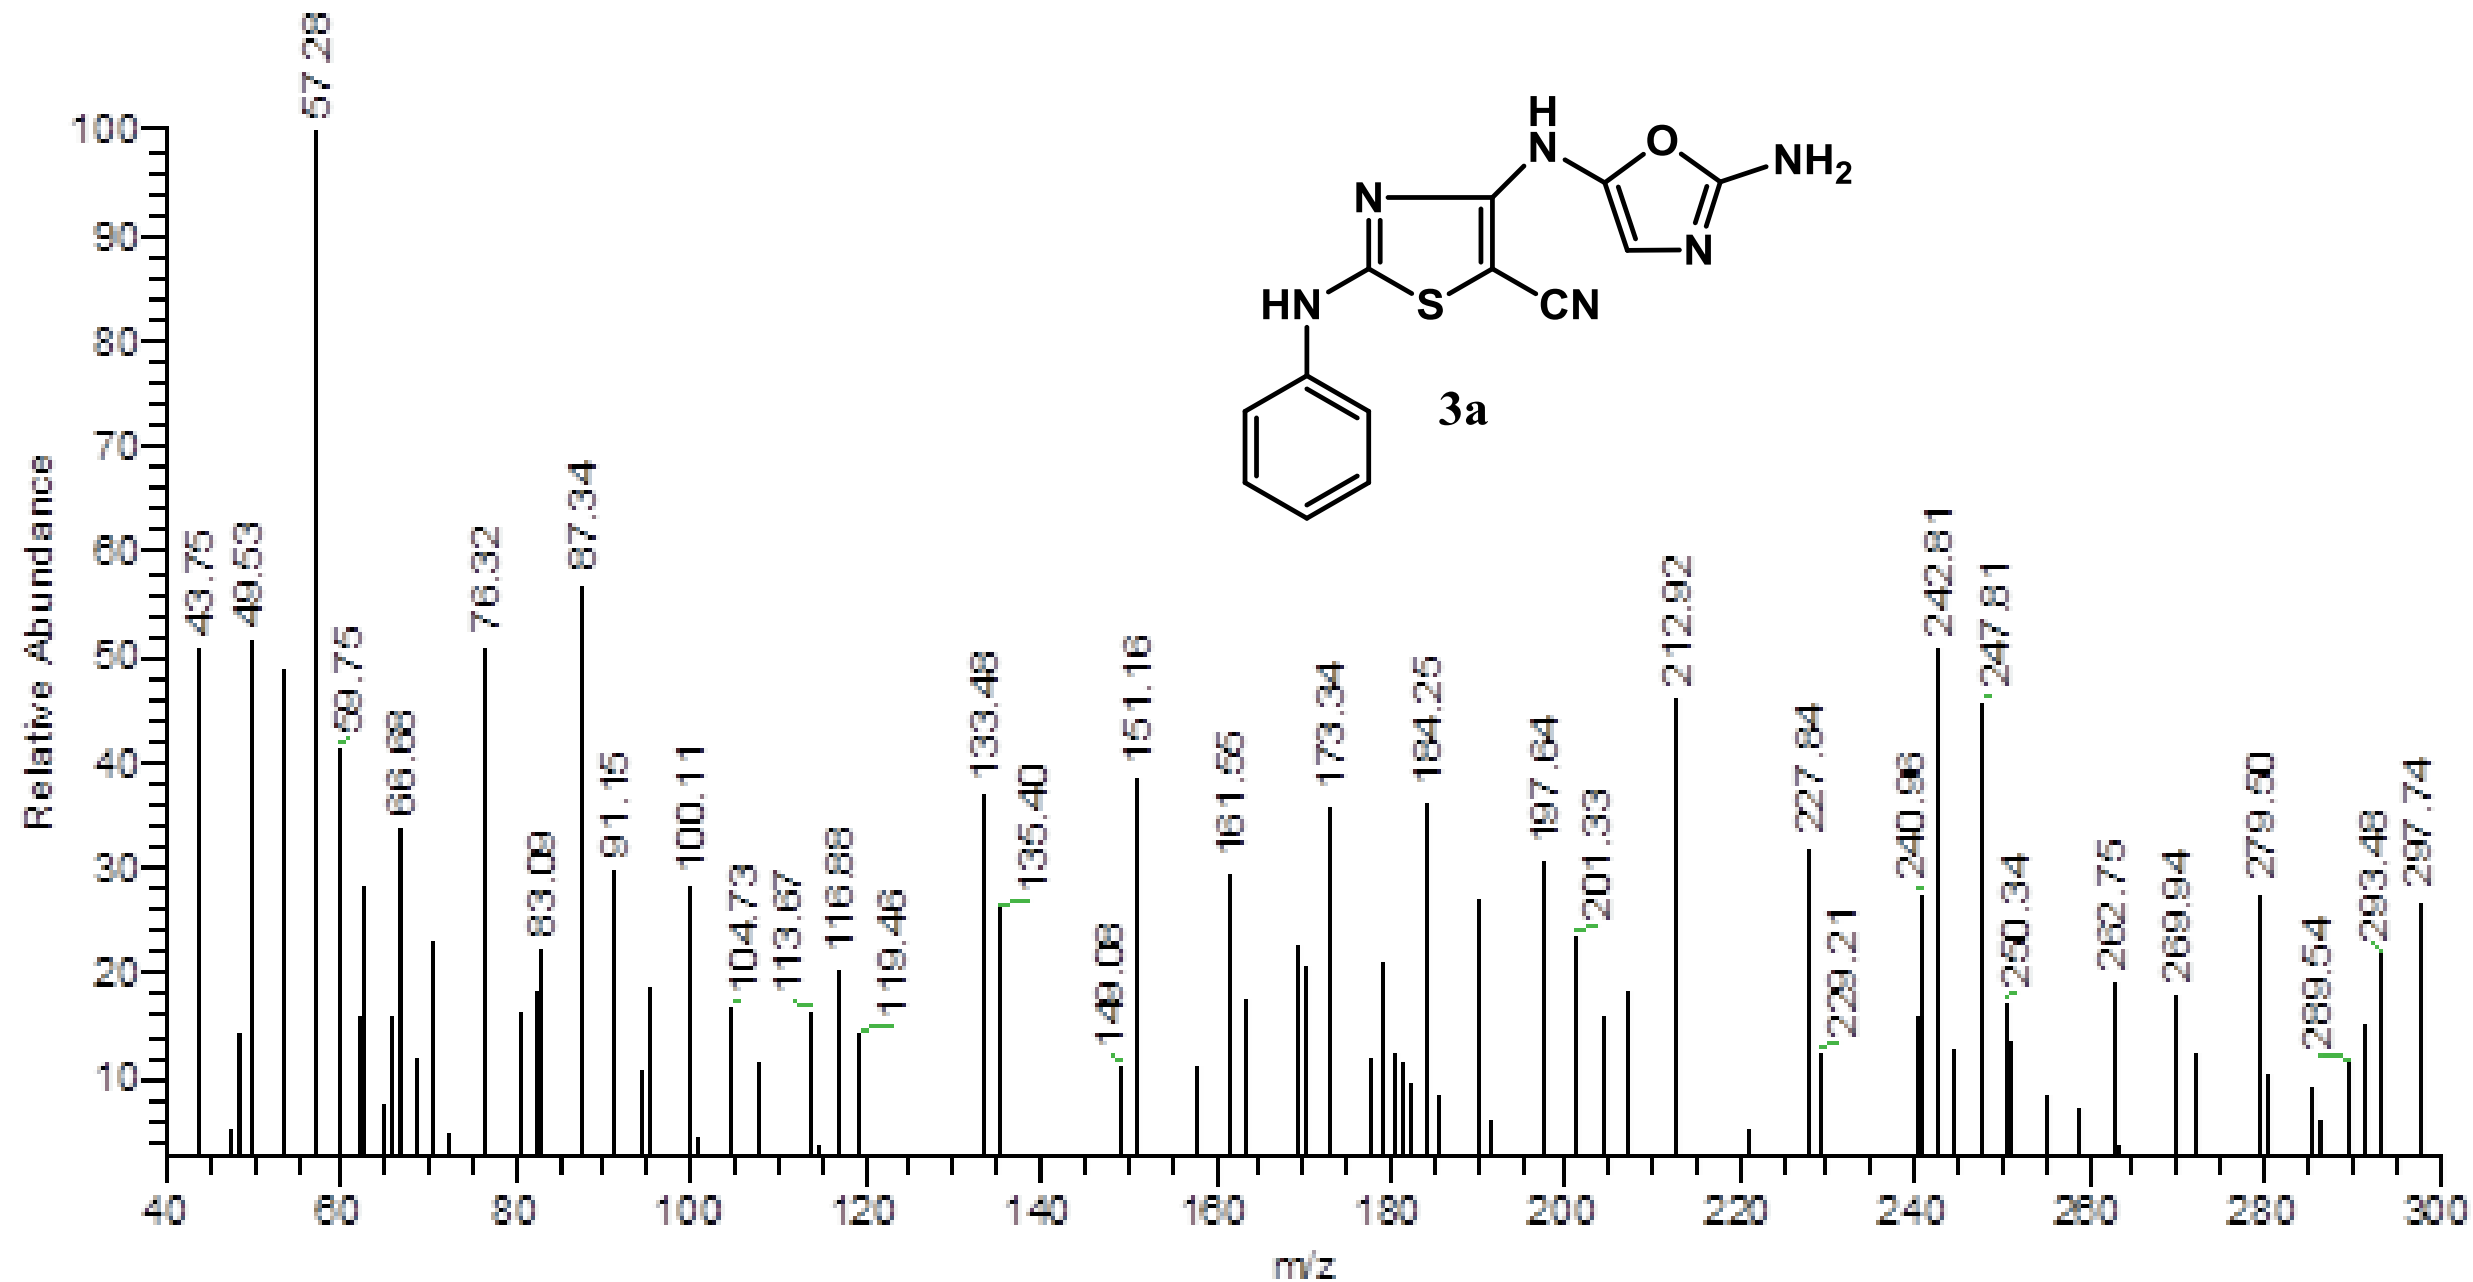



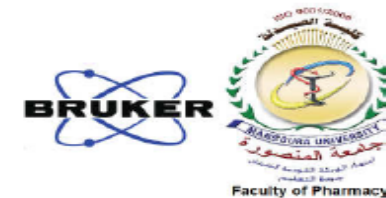

Current Data Parameters  
 NAME Alaa Abdullah-2-HNMR-  
 EXPNO 10  
 PROCNO 1

F2 - Acquisition Parameters  
 Date\_ 20220510  
 Time\_ 14.44 h  
 INSTRUM spect  
 PROBHD Z108618\_0945 (   
 PULPROG zg30  
 TD 65536  
 SOLVENT DMSO  
 NS 16  
 DS 2  
 SWH 8012.820 Hz  
 FIDRES 0.244532 Hz  
 AQ 4.0894465 sec  
 RG 158.72  
 DW 62.400 usec  
 DE 6.50 usec  
 TE 295.3 K  
 D1 1.00000000 sec  
 TD0 1  
 SFO1 400.2024712 MHz  
 NUC1 1H  
 P1 13.50 usec  
 PLW1 13.00000000 W

F2 - Processing parameters  
 SI 65536  
 SF 400.200000 MHz  
 WDW EM  
 SSB 0  
 LB 0.30 Hz  
 GB 0  
 PC 1.00

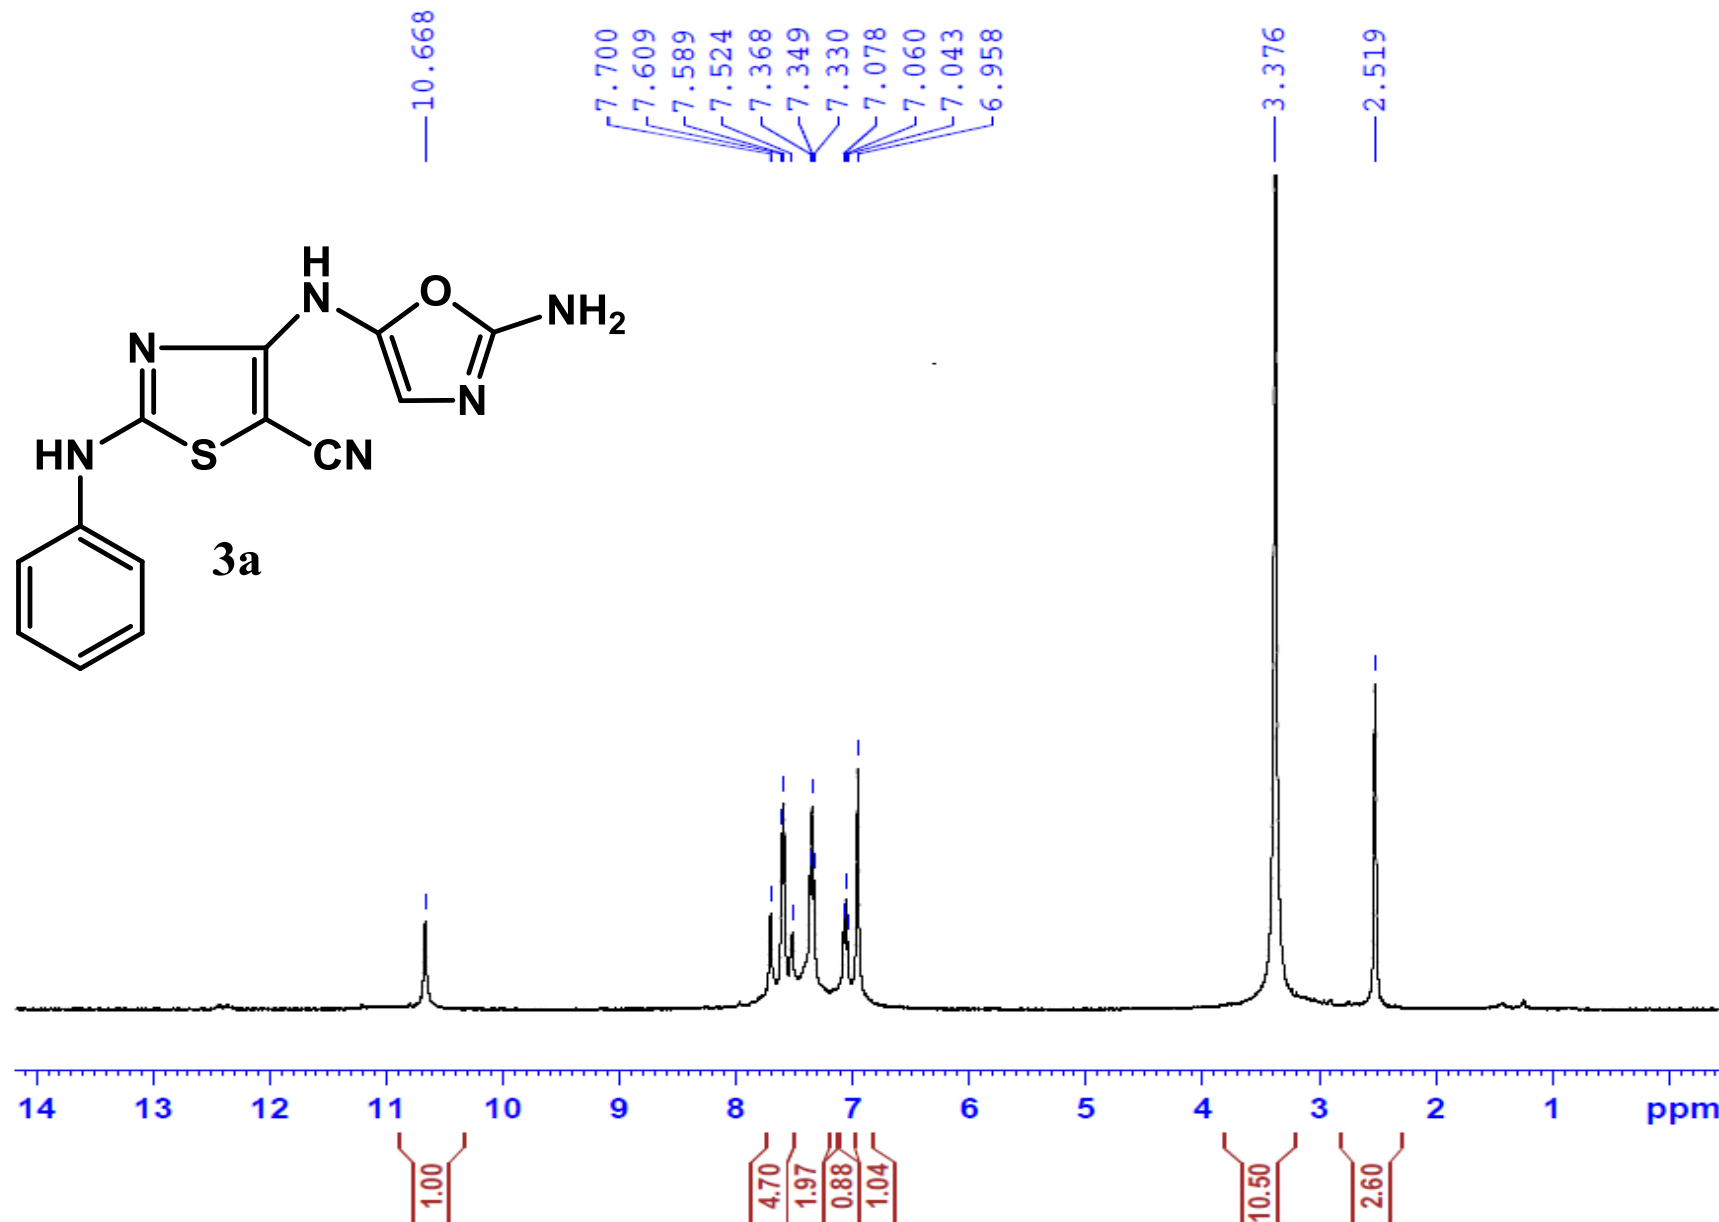

Alaa Abdullah-2-HNMR-DMSO-AF

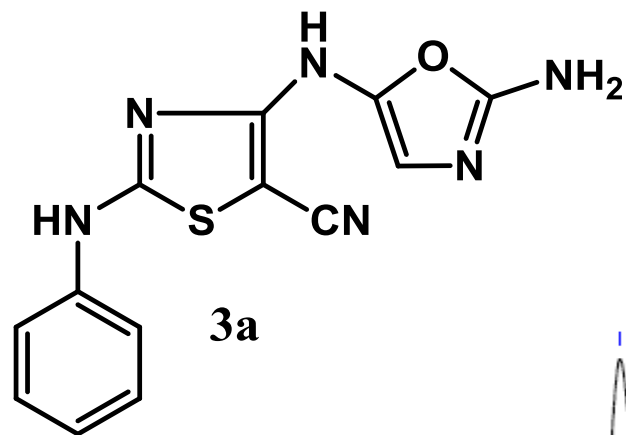

7.700  
7.609  
7.589  
7.524  
7.368  
7.349  
7.330  
7.078  
7.060  
7.043  
6.958

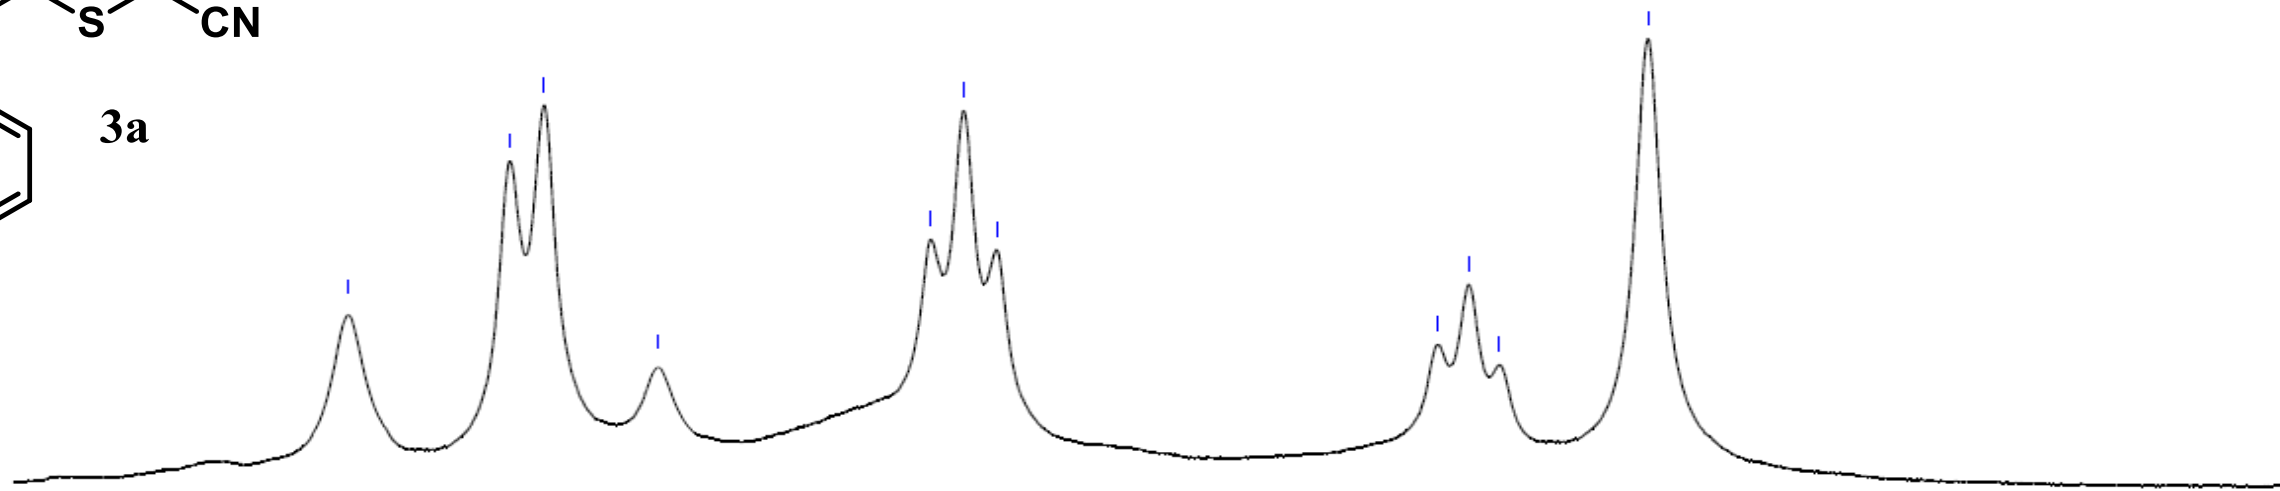

7.8 7.7 7.6 7.5 7.4 7.3 7.2 7.1 7.0 6.9 6.8 ppm

4.70 1.97 0.88 1.04

Alaa Abdullah - 2 - C13 - T

165.0596  
164.9646  
147.0877  
140.2231  
134.8854  
129.5556  
126.0447  
123.3769  
118.7428  
116.8362

57.1385  
40.5990  
40.3907  
40.1820  
39.9732  
39.7648  
39.5559  
39.3475

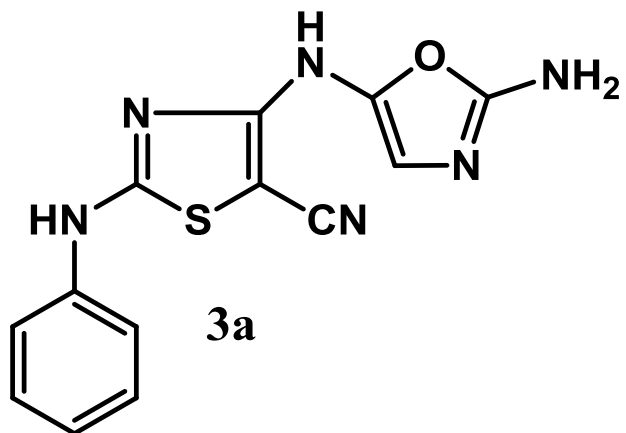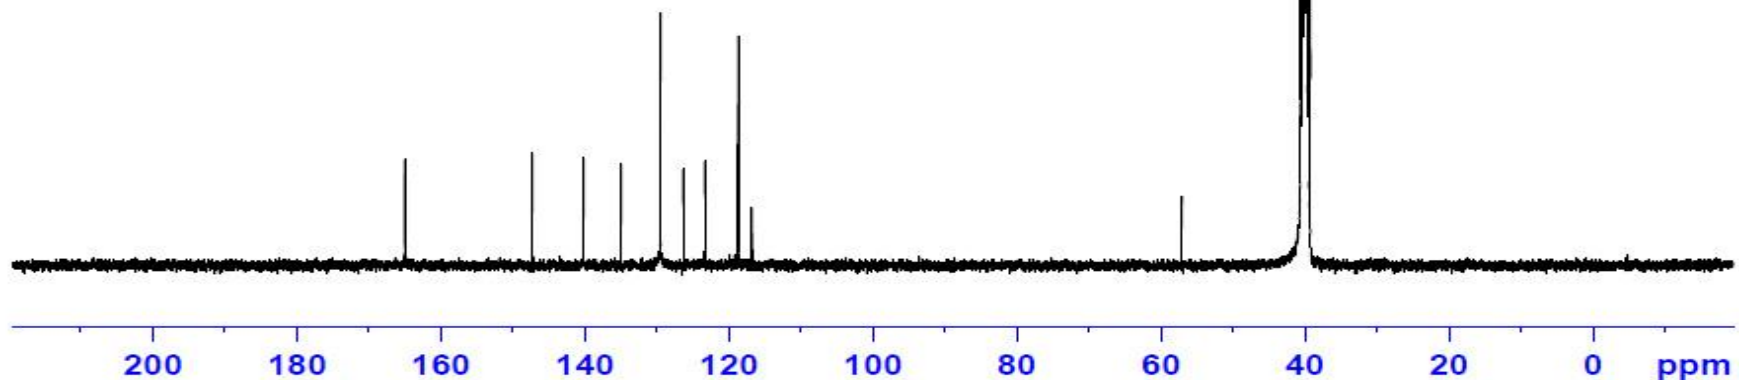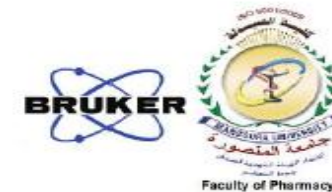

Current Data Parameters  
NAME Alaa Abdullah - 2 - C13 - T  
EXPNO 10  
PROCNO 1

F2 - Acquisition Parameters  
Date\_ 20220517  
Time 6.58 h  
INSTRUM spect  
PROBHD Z108618\_0945 f  
PULPROG zgpg30  
TD 65536  
SOLVENT DMSO  
NS 2100  
DS 4  
SWH 24038.461 Hz  
FIDRES 0.733596 Hz  
AQ 1.3631488 sec  
RG 197.77  
DW 20.800 usec  
DE 6.50 usec  
TE 296.6 K  
D1 2.00000000 sec  
D11 0.03000000 sec  
TDO 1  
SFO1 100.6404331 MHz  
NUC1 13C  
P1 10.00 usec  
PLW1 47.00000000 W  
SFO2 400.2016008 MHz  
NUC2 1H  
CPDPRG2 waltz16  
PCPD2 90.00 usec  
PLW2 13.00000000 W  
PLW12 0.29249999 W  
PLW13 0.14713000 W

F2 - Processing parameters  
SI 32768  
SF 100.6303700 MHz  
WDW EM  
SSB 0  
LB 1.00 Hz  
GB 0  
PC 1.40

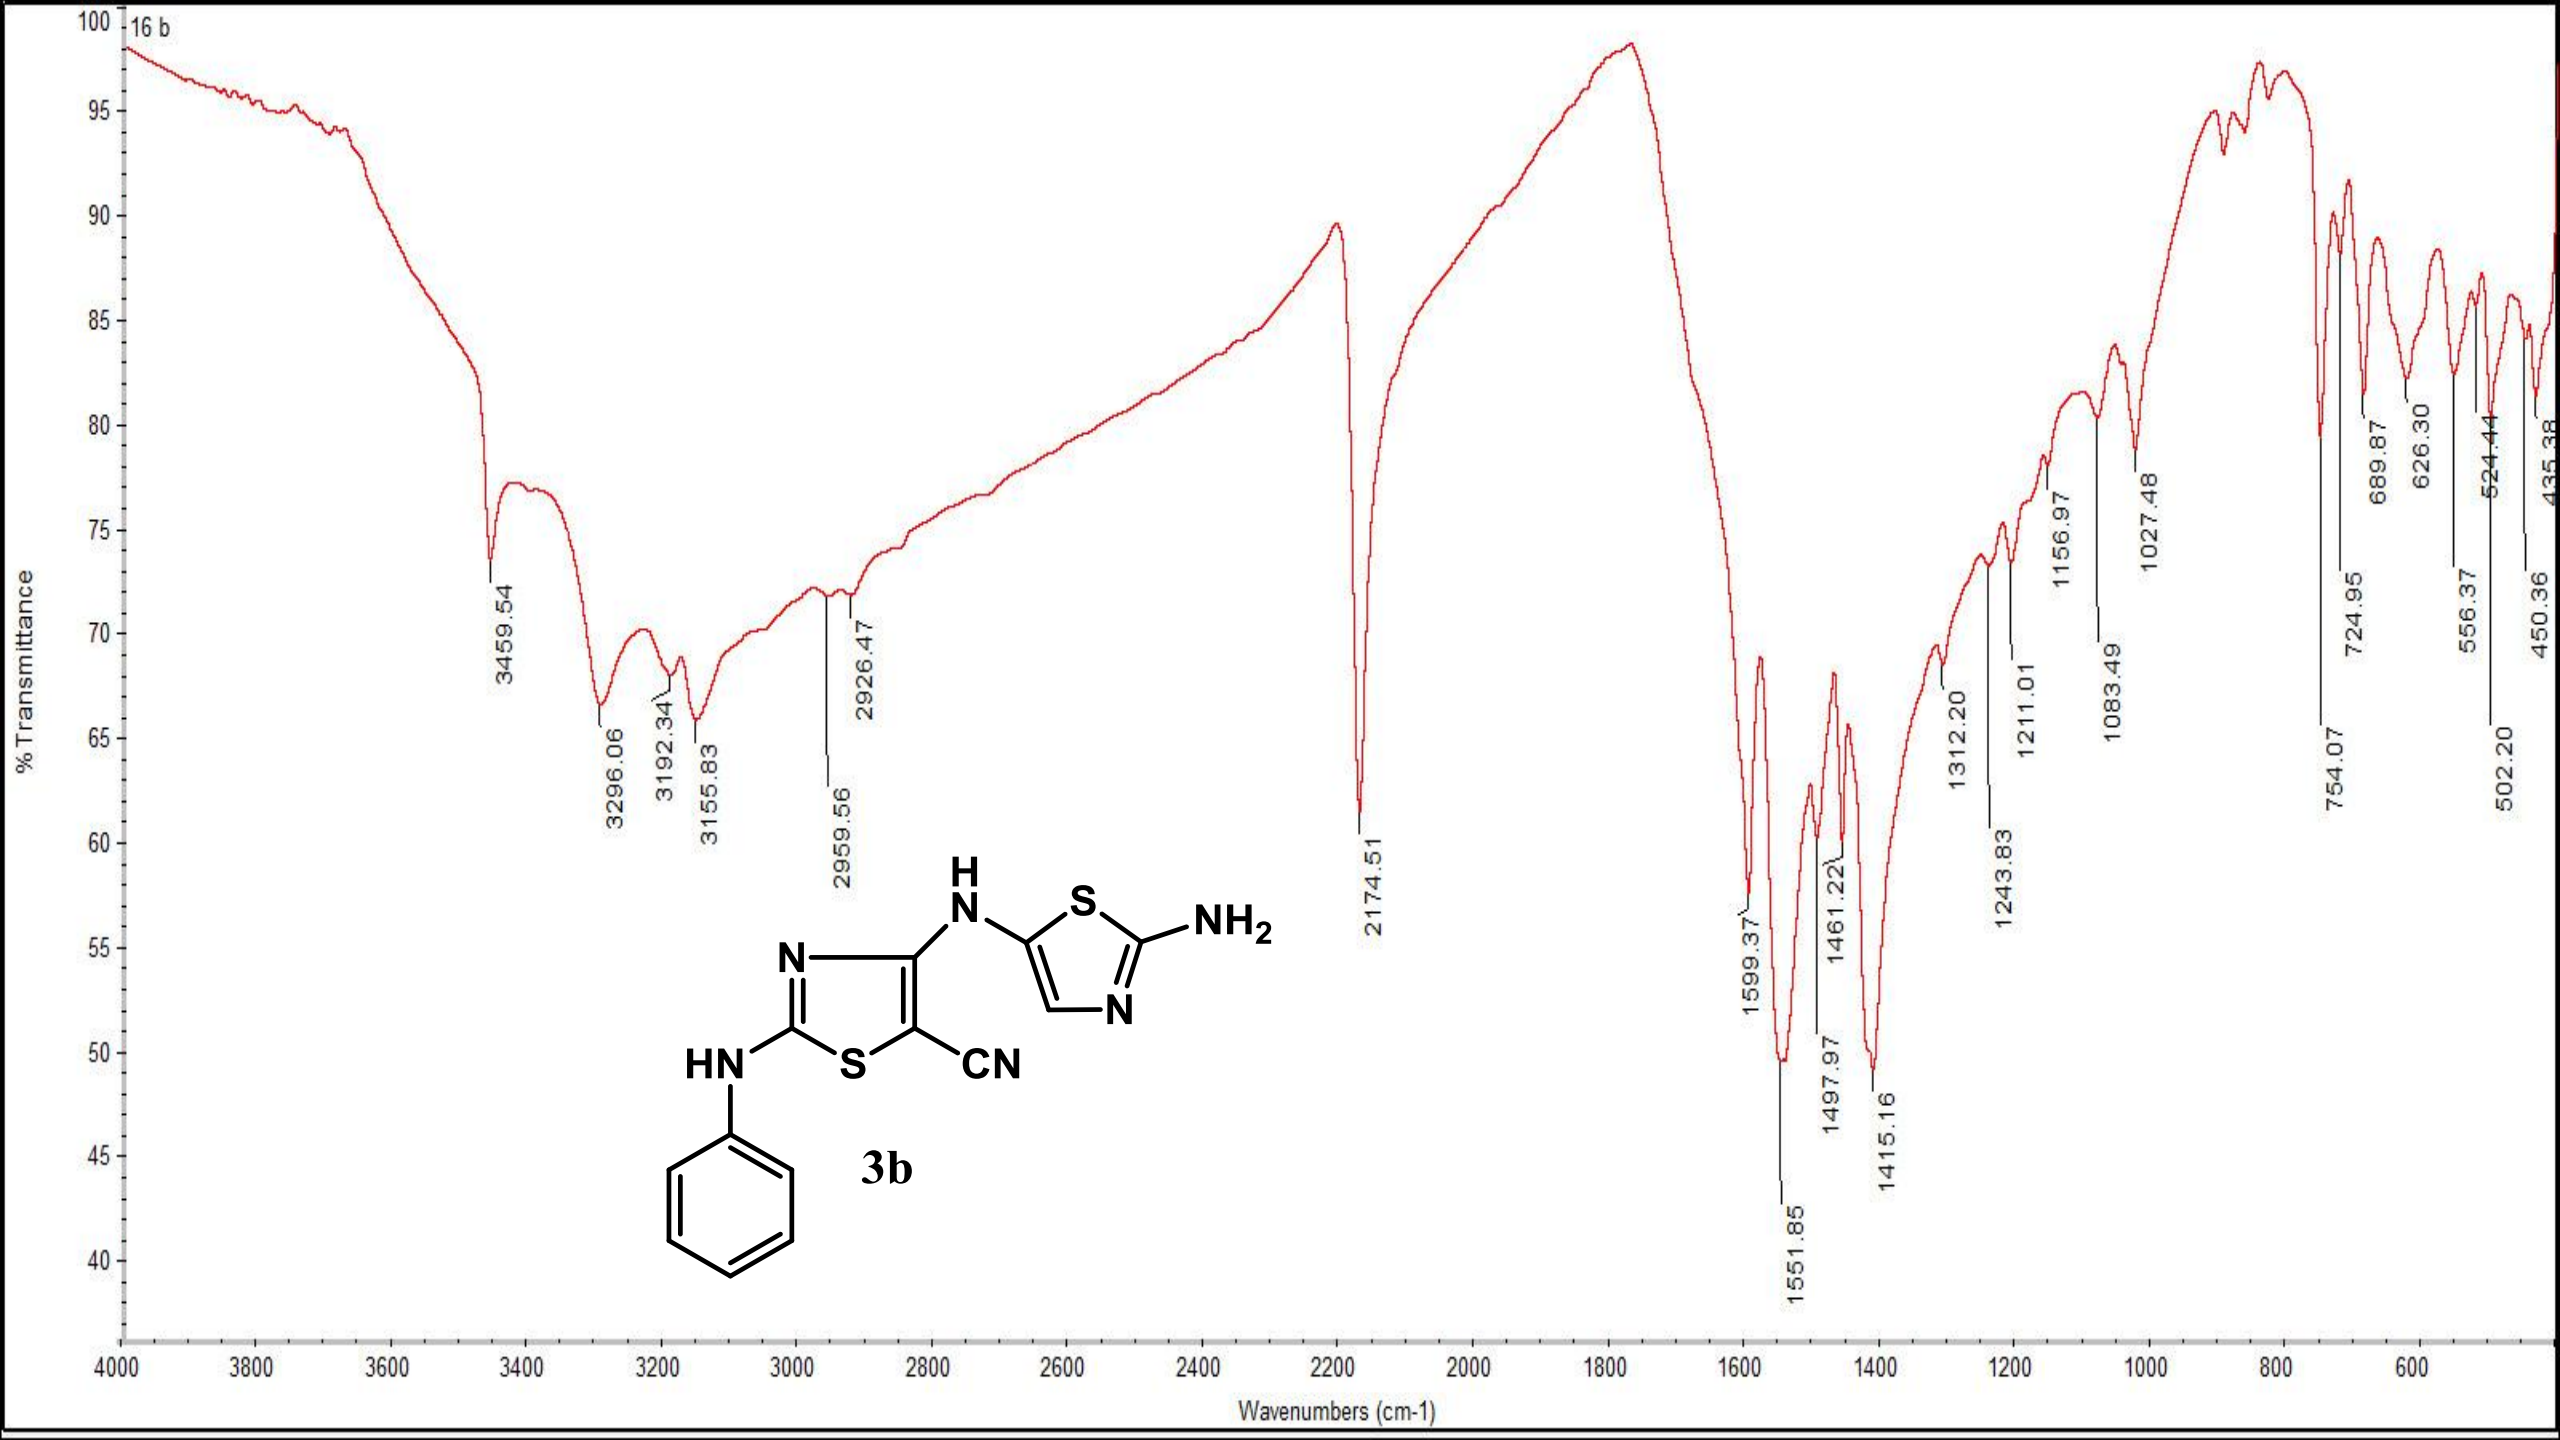

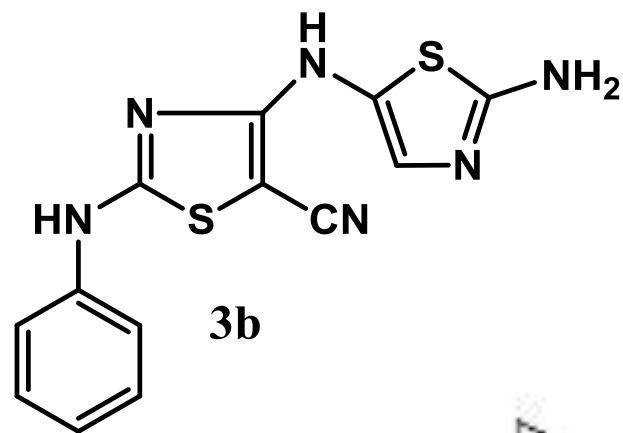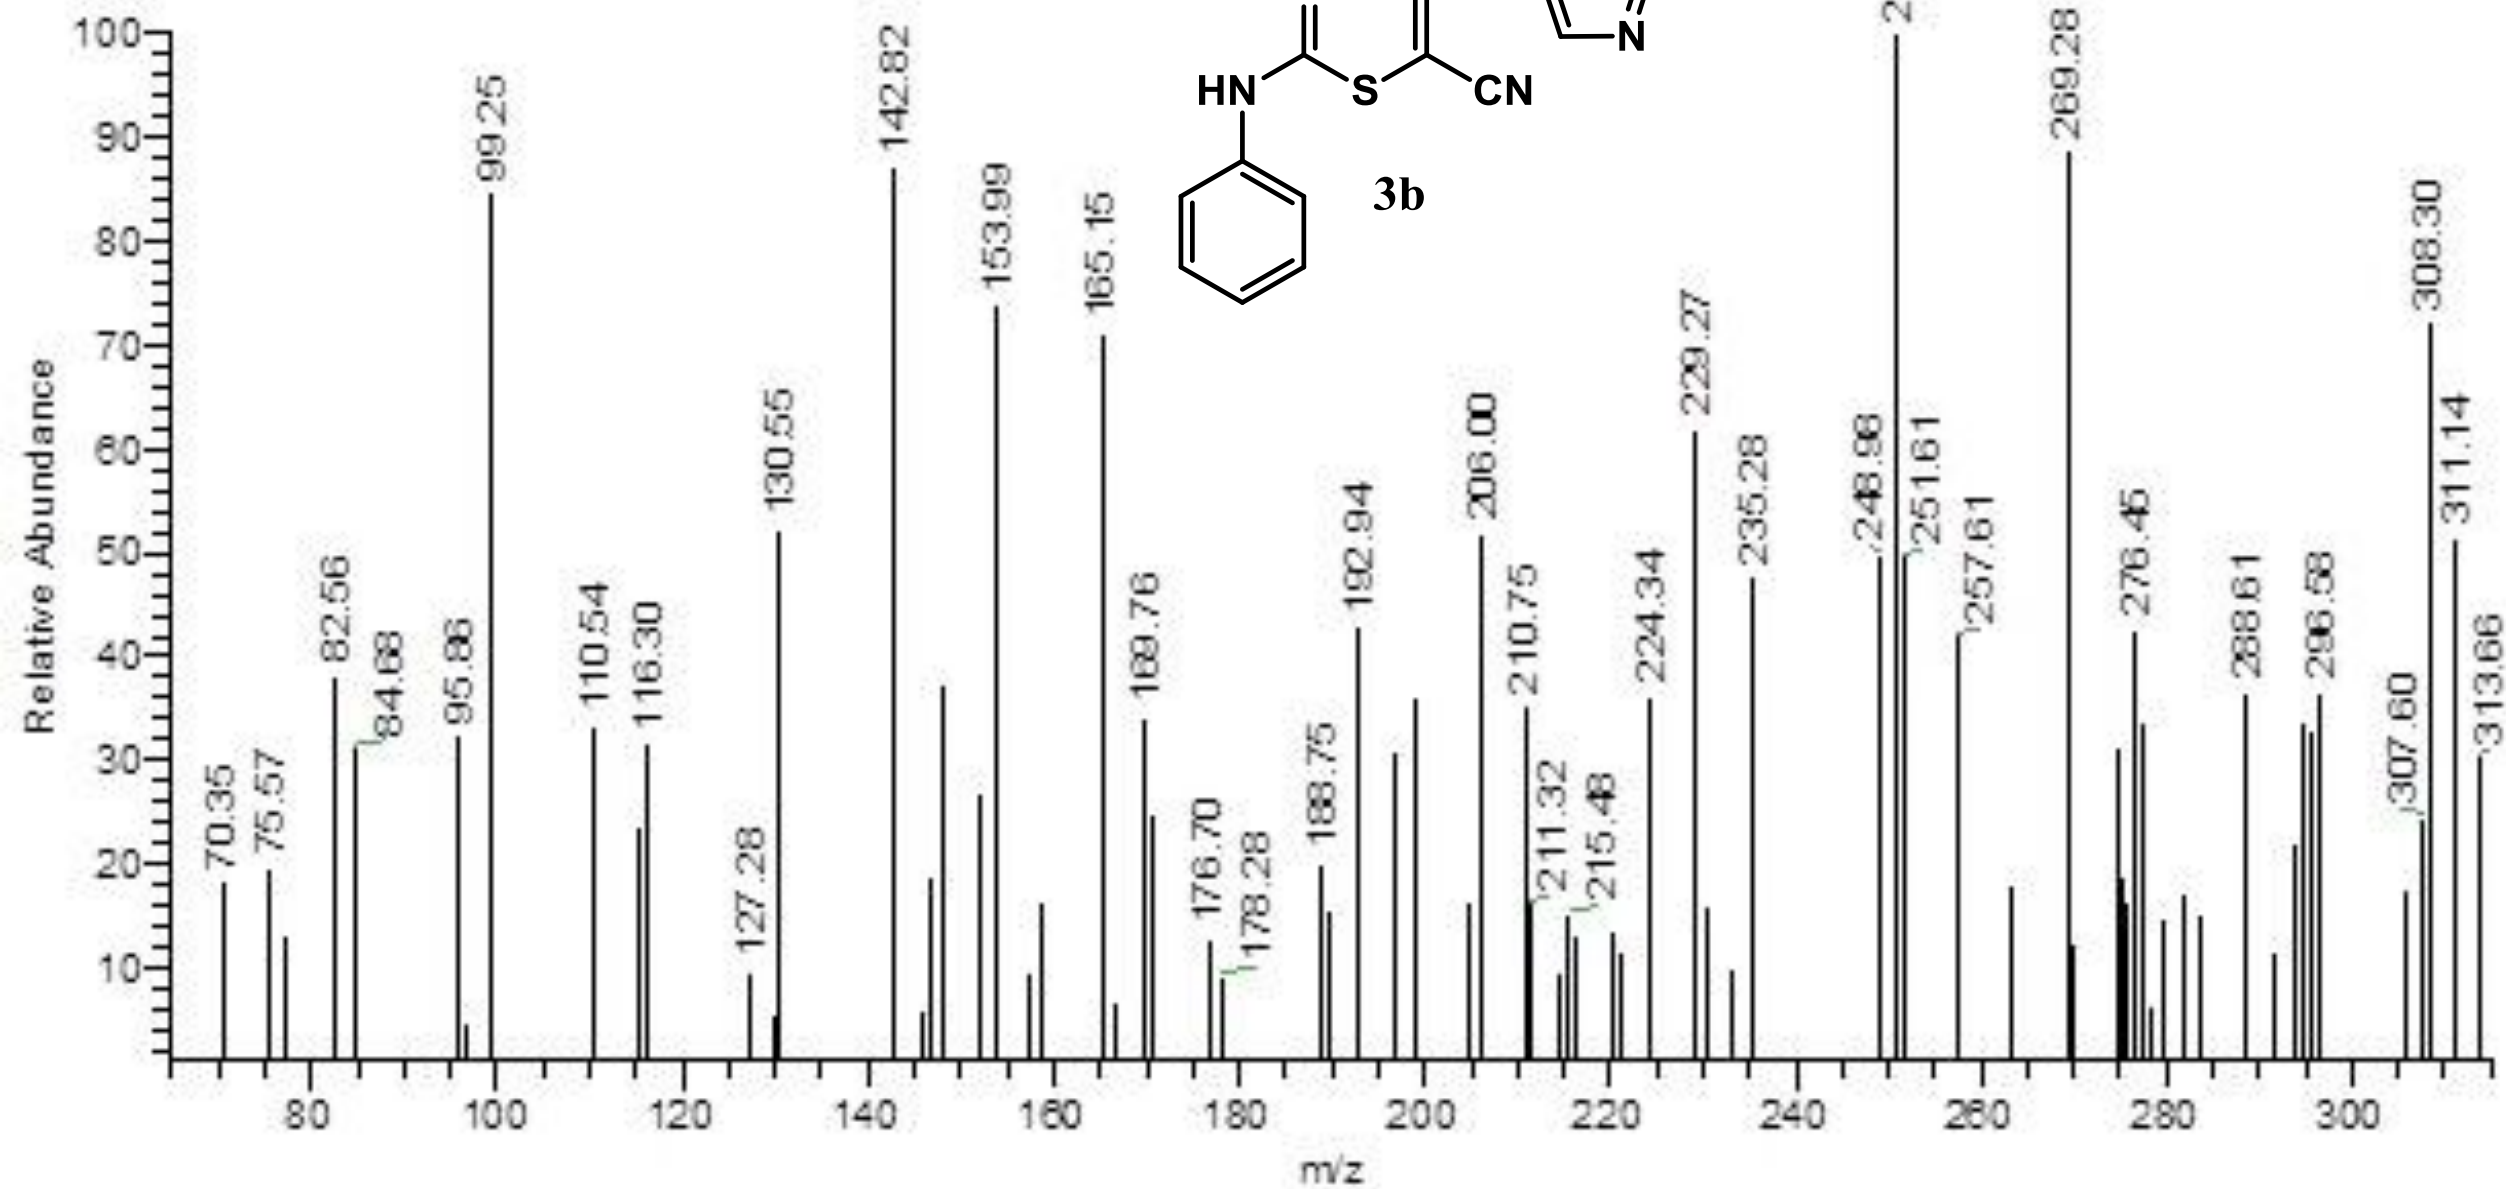

Alaa Abdullah-2-HNMR-DMSO-AF

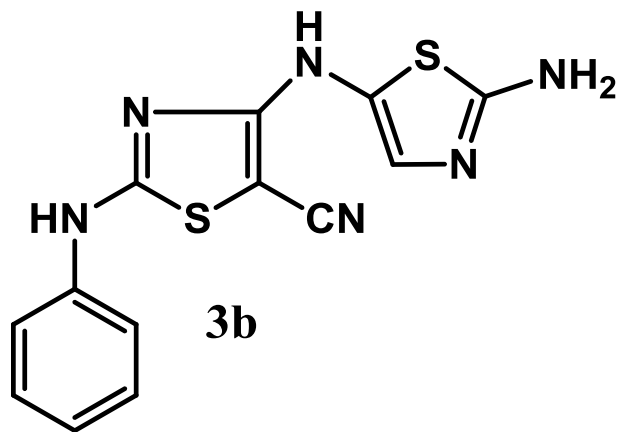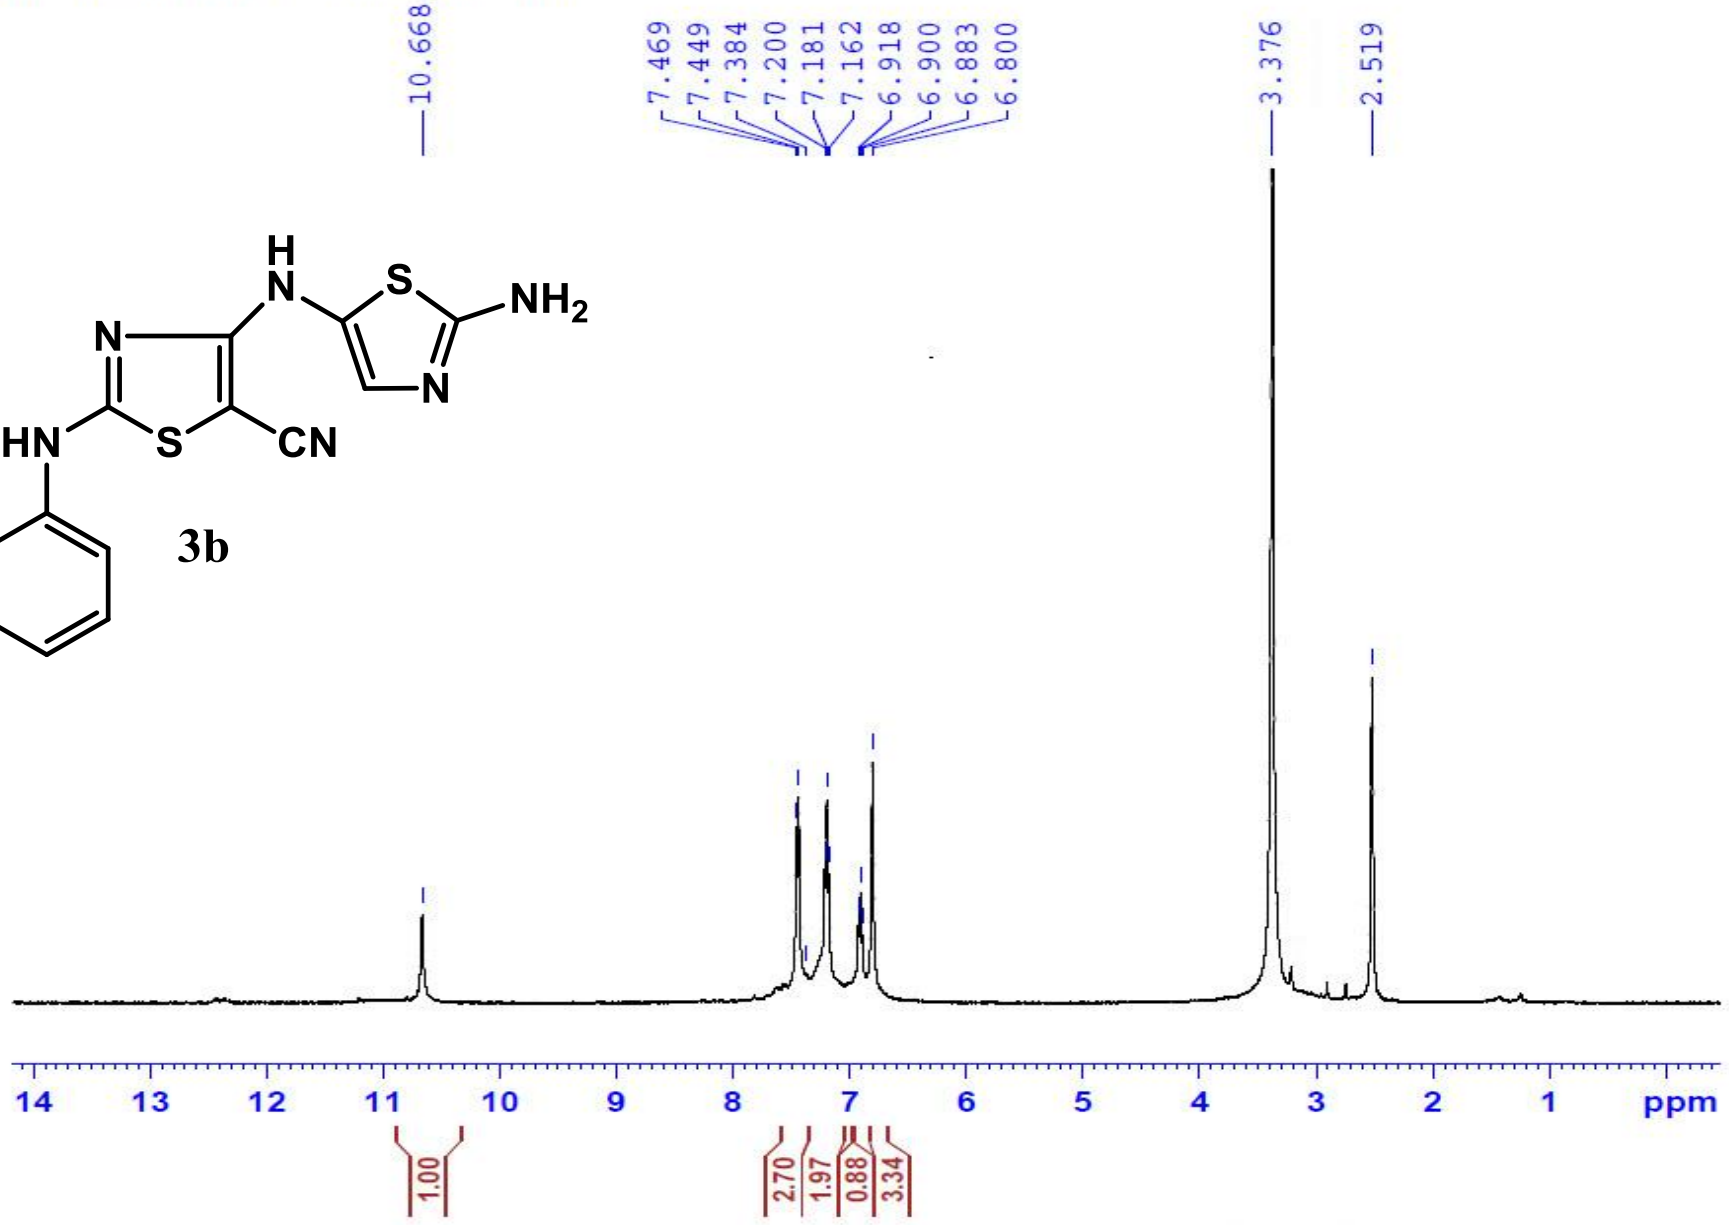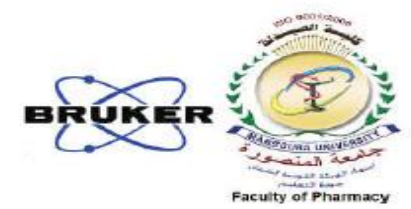

Current Data Parameters  
NAME Alaa Abdullah-2-HNMR-  
EXPNO 10  
PROCNO 1

F2 - Acquisition Parameters  
Date\_ 20220510  
Time\_ 14.44 h  
INSTRUM spect  
PROBHD Z108618\_0945 (   
PULPROG zg30  
TD 65536  
SOLVENT DMSO  
NS 16  
DS 2  
SWH 8012.820 Hz  
FIDRES 0.244532 Hz  
AQ 4.0894465 sec  
RG 158.72  
DW 62.400 usec  
DE 6.50 usec  
TE 295.3 K  
D1 1.00000000 sec  
TD0 1  
SFO1 400.2024712 MHz  
NUC1 1H  
P1 13.50 usec  
PLW1 13.00000000 W

F2 - Processing parameters  
SI 65536  
SF 400.200000 MHz  
WDW EM  
SSB 0  
LB 0.30 Hz  
GB 0  
PC 1.00



Alaa Abdullah-2-HNMR-DMSO-AF

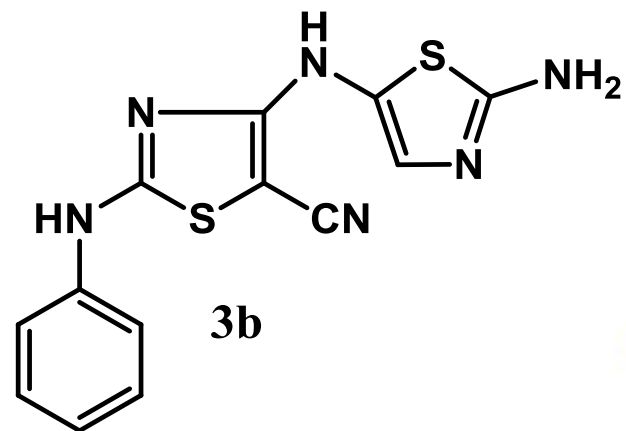

7.469  
7.449  
7.384  
7.200  
7.181  
7.162  
6.918  
6.900  
6.883  
6.800

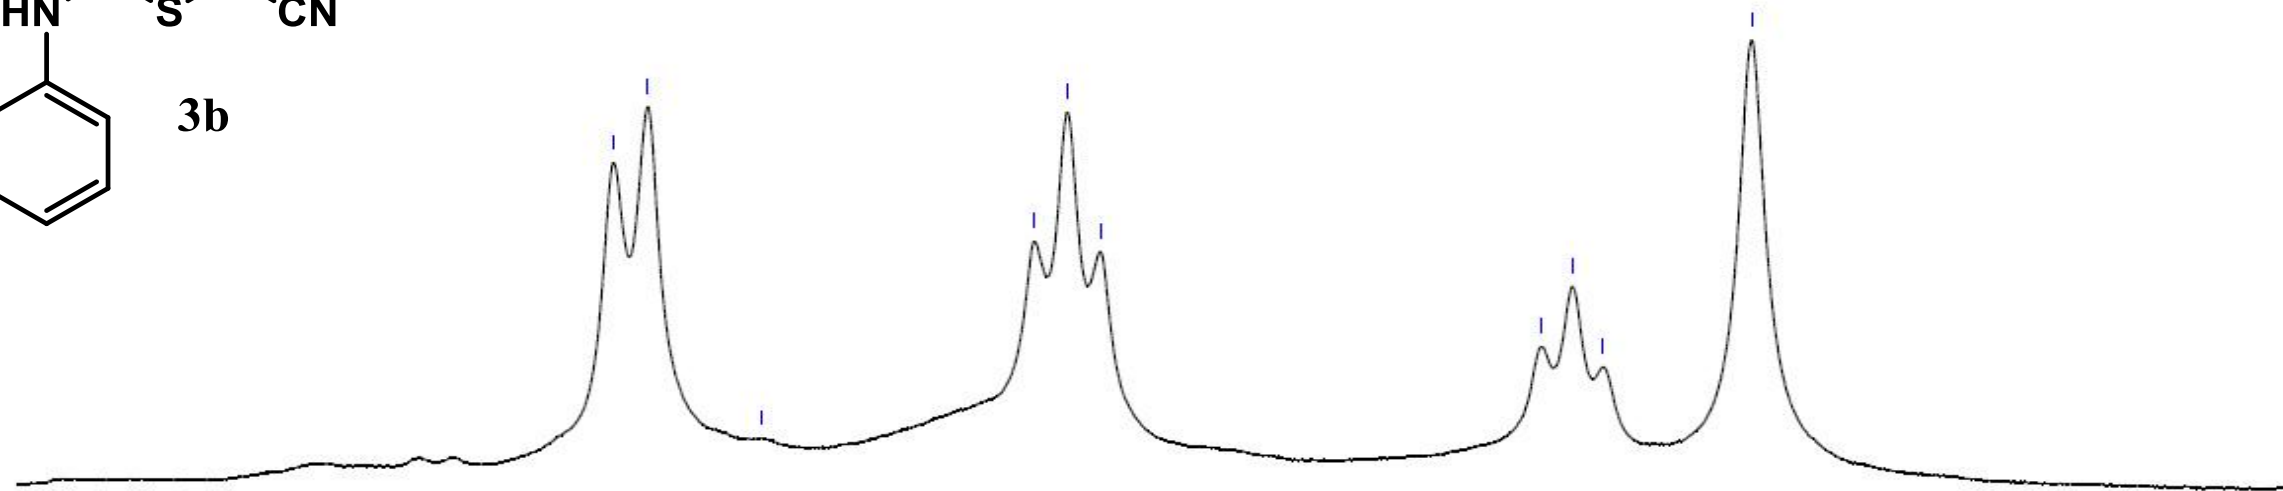

7.7 7.6 7.5 7.4 7.3 7.2 7.1 7.0 6.9 6.8 6.7 6.6 ppm

2.70 1.97 0.88 3.34

Alaa Abdullah - 2 - C13 - T

167.0566  
166.9745  
148.3200  
144.2743  
140.2531  
135.1141  
129.5256  
124.1769  
118.7628  
116.8662

57.1885  
40.5990  
40.3907  
40.1820  
39.9732  
39.7648  
39.5559  
39.3475

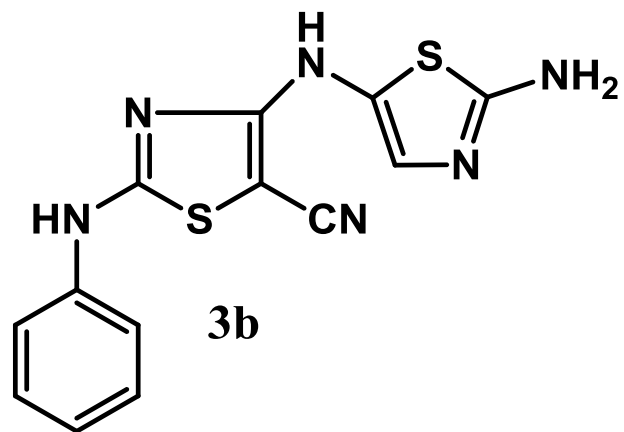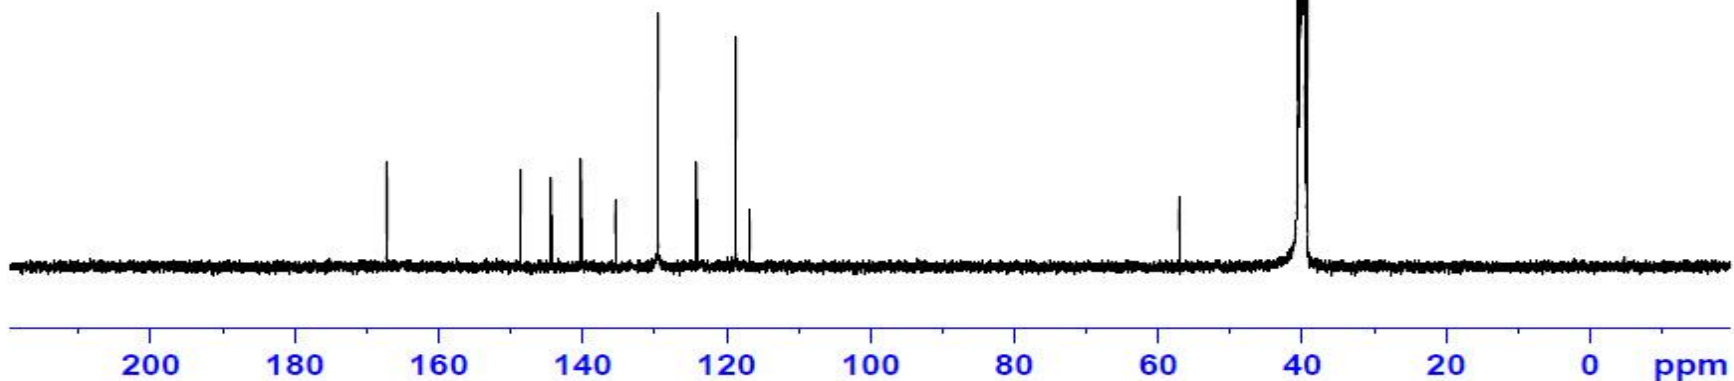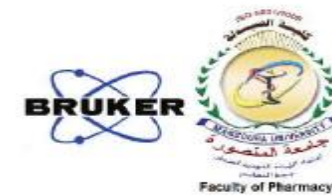

Current Data Parameters  
NAME Alaa Abdullah - 2 - C13 - T  
EXPNO 10  
PROCNO 1

F2 - Acquisition Parameters  
Date\_ 20220517  
Time 6.58 h  
INSTRUM spect  
PROBHD z108618\_0945 (1  
PULPROG zgpg30  
TD 65536  
SOLVENT DMSO  
NS 2100  
DS 4  
SWH 24038.461 Hz  
FIDRES 0.733596 Hz  
AQ 1.3631488 sec  
RG 197.77  
DW 20.800 usec  
DE 6.50 usec  
TE 296.6 K  
D1 2.00000000 sec  
D11 0.03000000 sec  
TDO 1  
SFO1 100.6404331 MHz  
NUC1 13C  
P1 10.00 usec  
PLW1 47.00000000 W  
SFO2 400.2016008 MHz  
NUC2 1H  
CPDPRG(2) waltz16  
PCPD2 90.00 usec  
PLW2 13.00000000 W  
PLW12 0.29249999 W  
PLW13 0.14713000 W

F2 - Processing parameters  
SI 32768  
SF 100.6303700 MHz  
WDW EM  
SFB 0  
LB 1.00 Hz  
GB 0  
PC 1.40



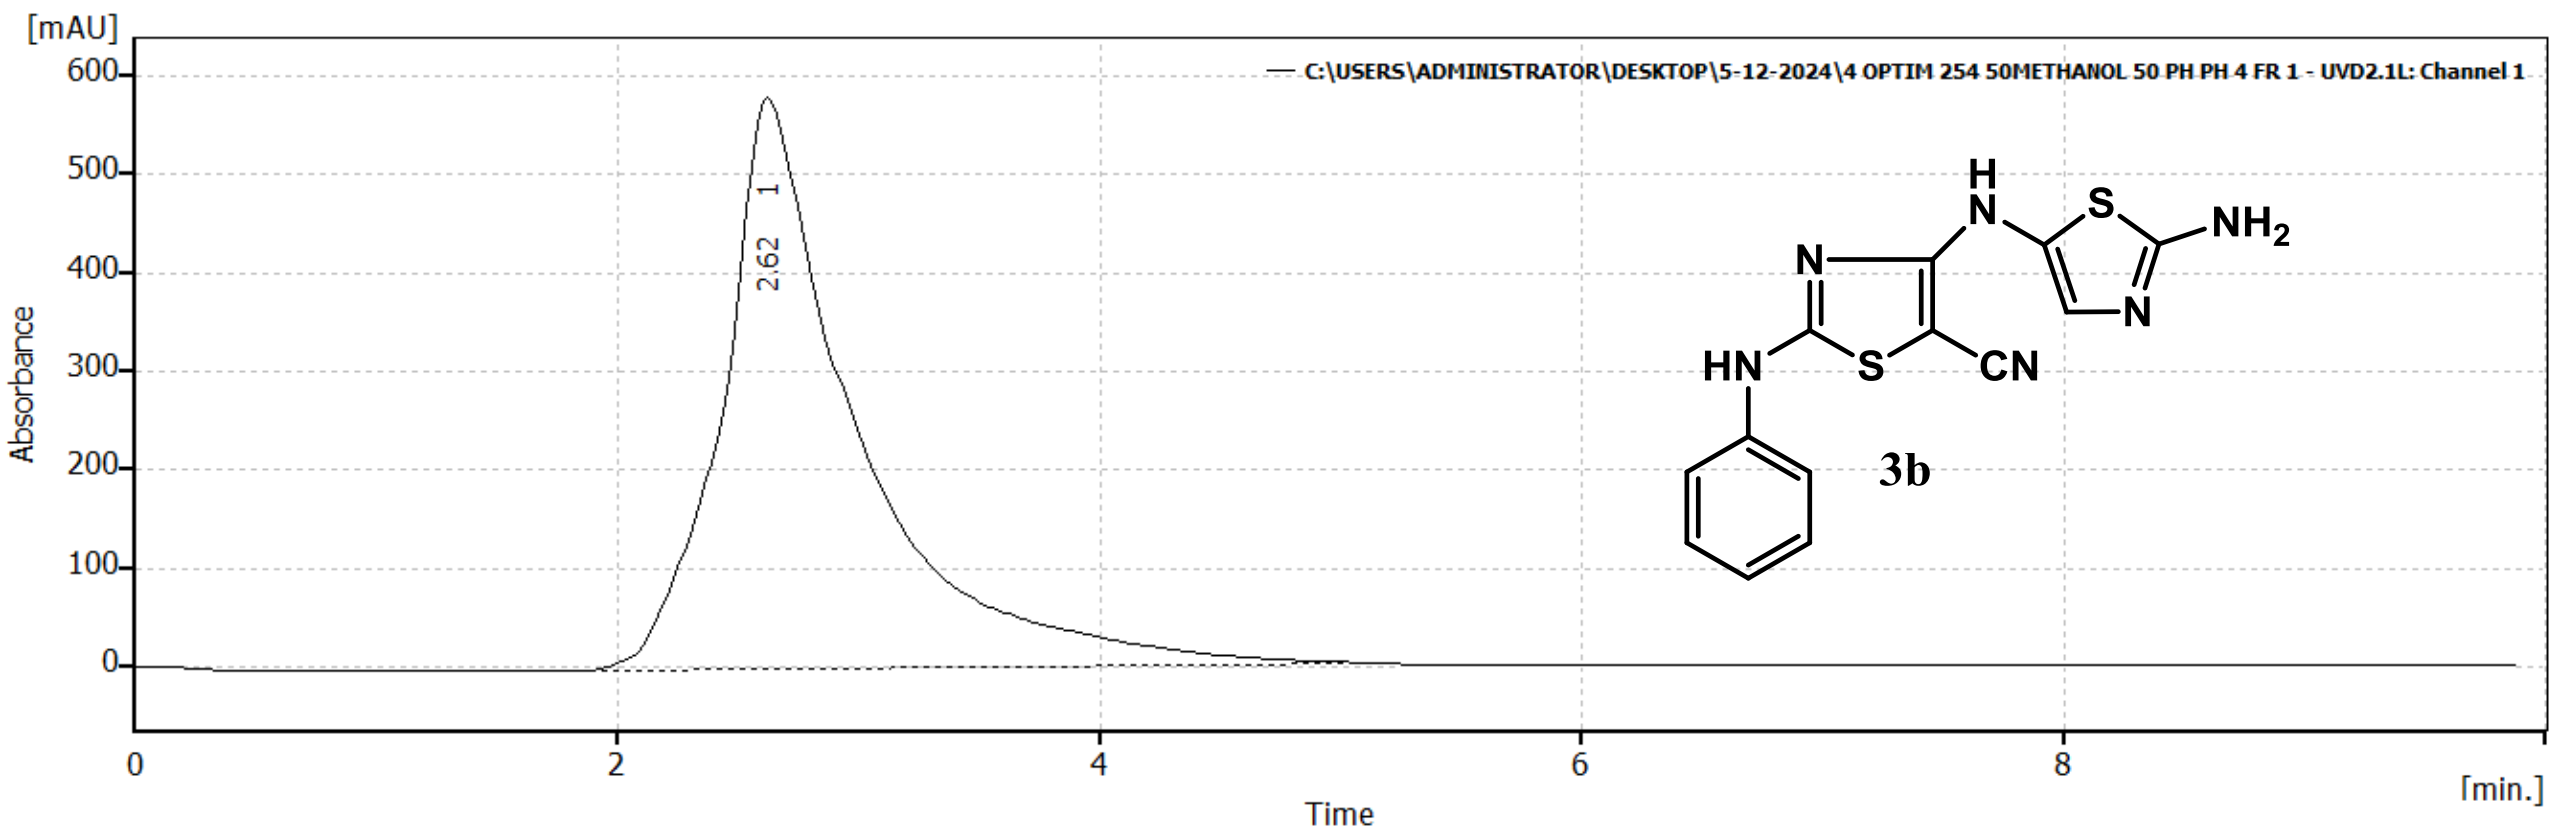

12

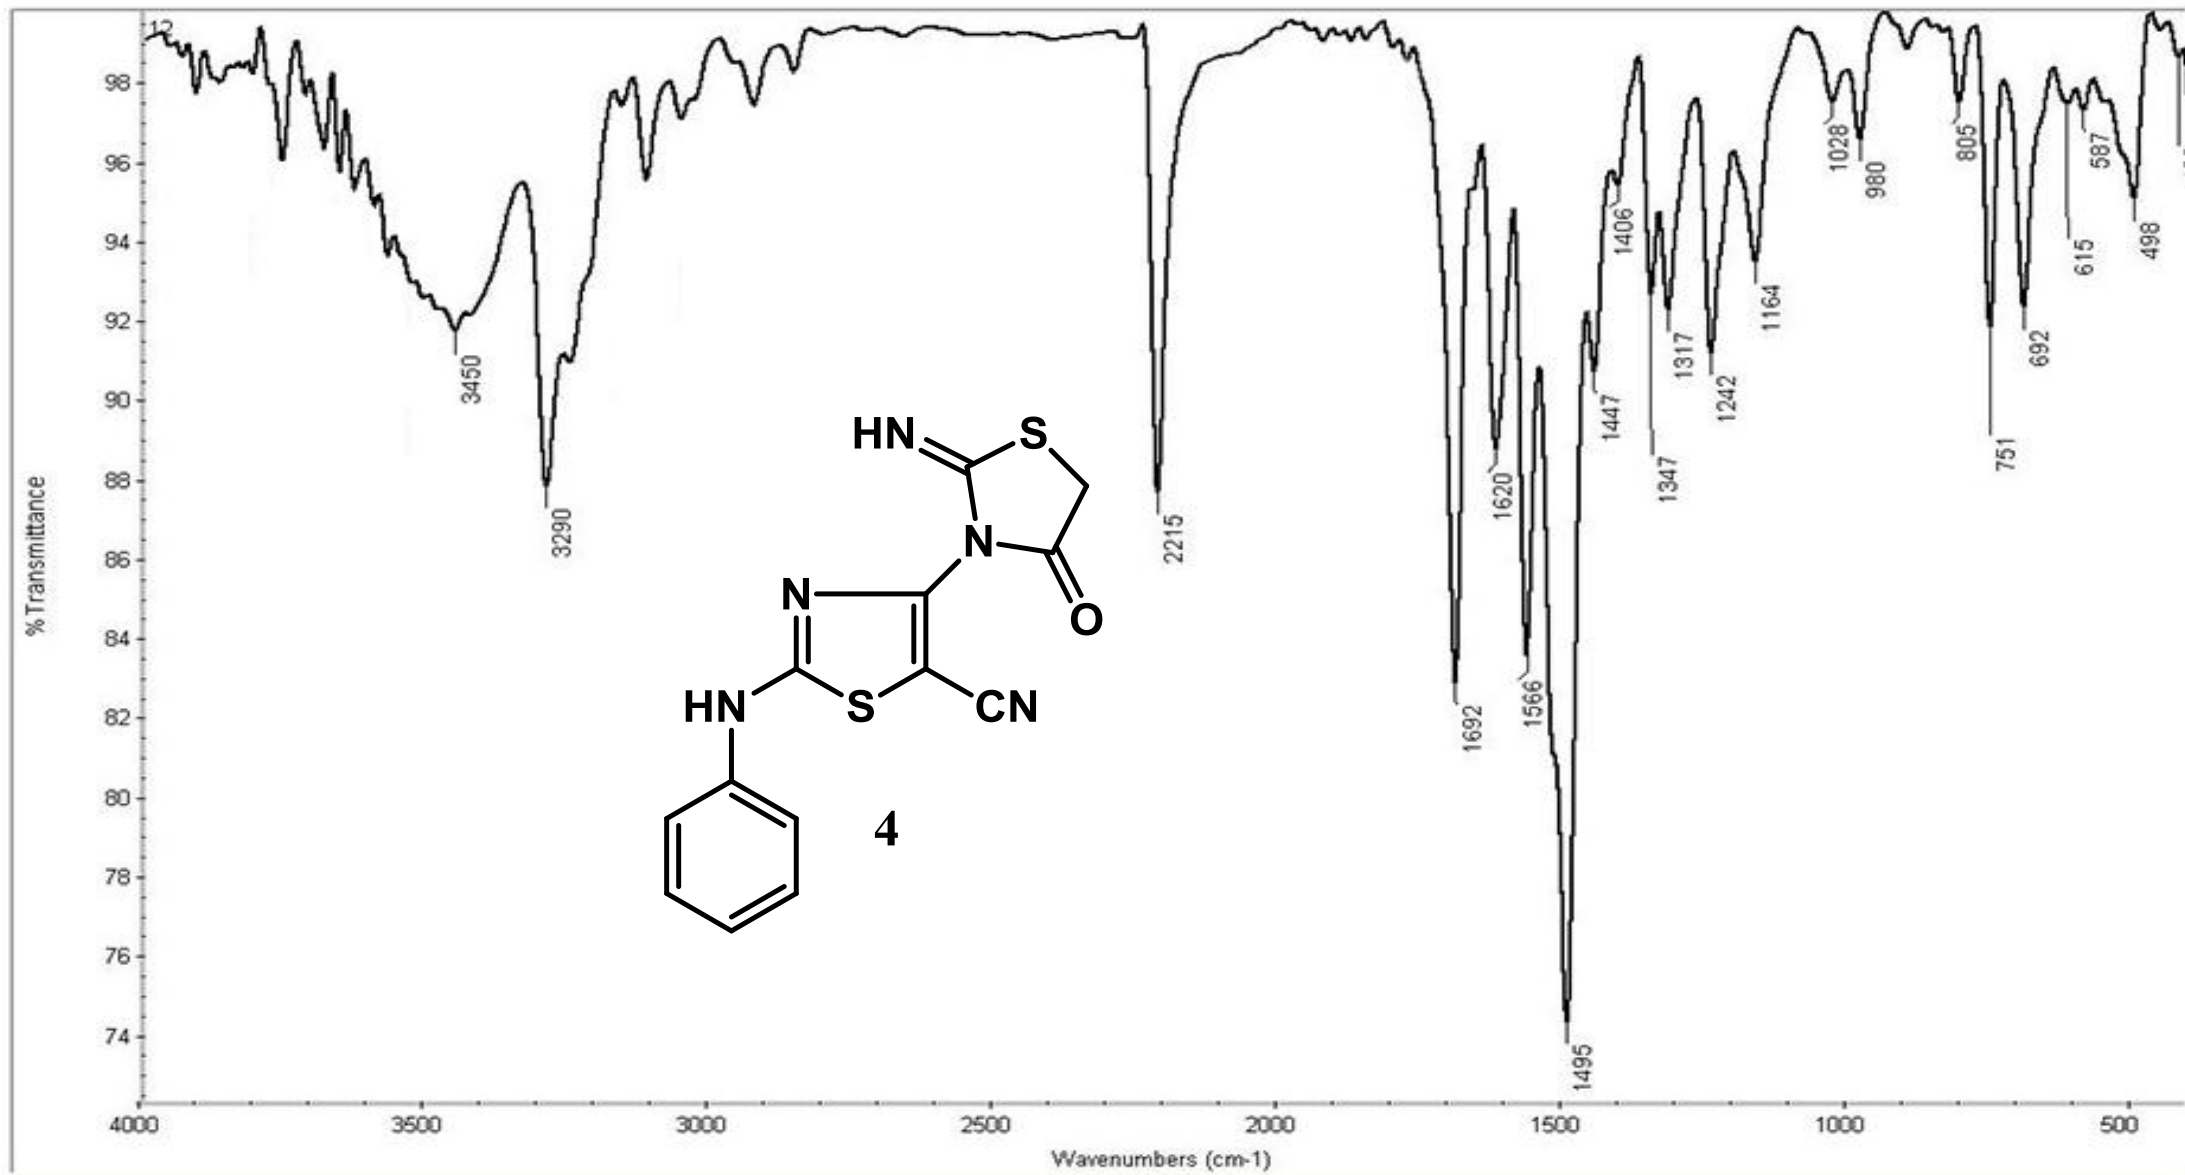

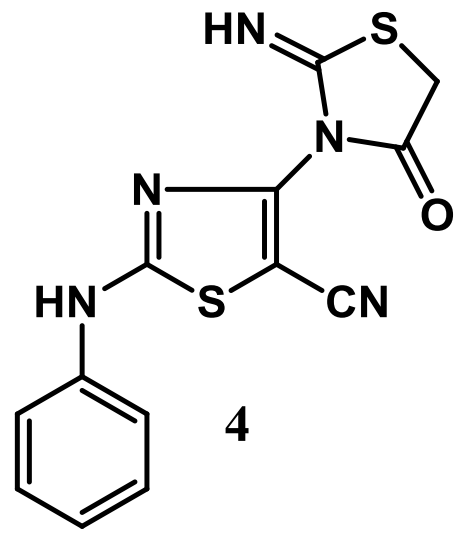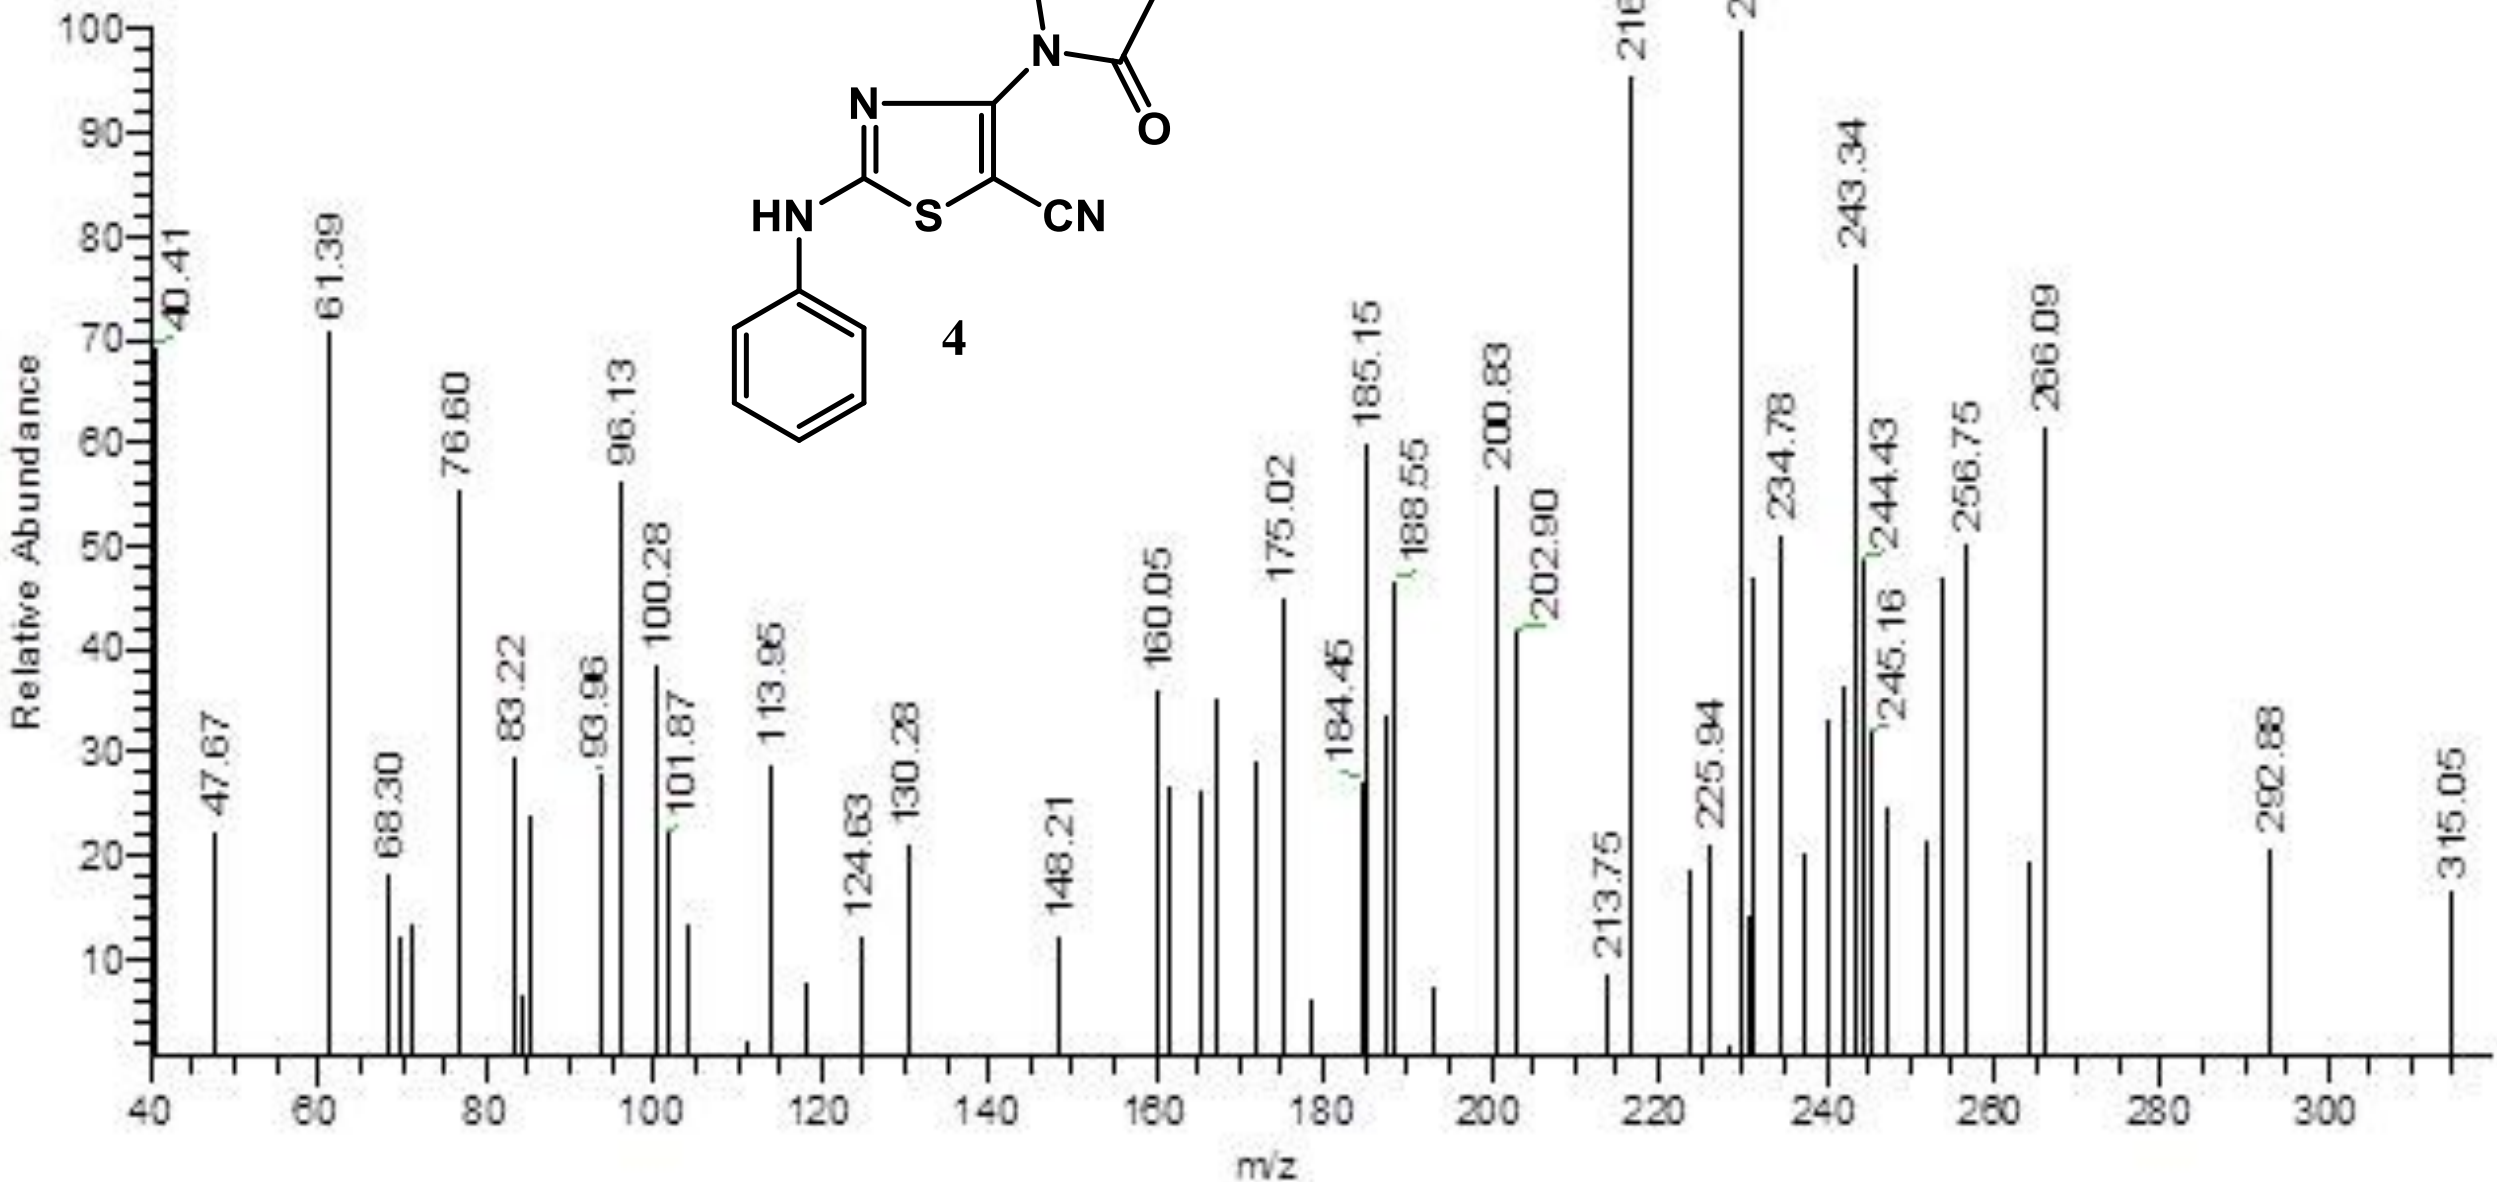

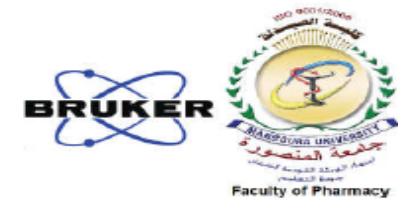

Current Data Parameters  
 NAME Alaa Abdullah-12-HNMF  
 EXPNO 10  
 PROCNO 1

F2 - Acquisition Parameters  
 Date\_ 20220510  
 Time\_ 15.42 h  
 INSTRUM spect  
 PROBHD Z108618\_0945 (   
 PULPROG zg30  
 TD 65536  
 SOLVENT DMSO  
 NS 16  
 DS 2  
 SWH 8012.820 HZ  
 FIDRES 0.244532 HZ  
 AQ 4.0894465 sec  
 RG 176.72  
 DW 62.400 usec  
 DE 6.50 usec  
 TE 295.3 K  
 D1 1.00000000 sec  
 TD0 1  
 SFO1 400.2024712 MHZ  
 NUC1 1H  
 P1 13.50 usec  
 PLW1 13.00000000 W

F2 - Processing parameters  
 SI 65536  
 SF 400.200000 MHZ  
 WDW EM  
 SSB 0  
 LB 0.30 Hz  
 GB 0  
 PC 1.00

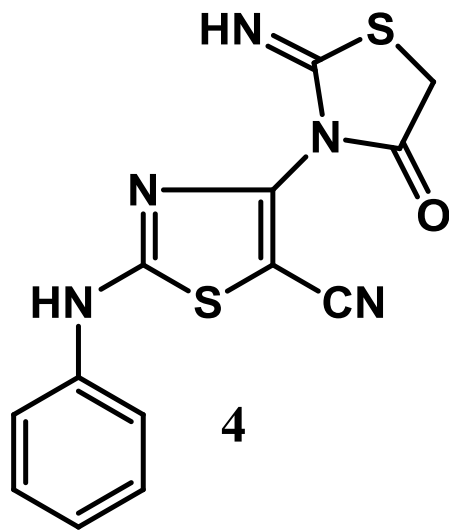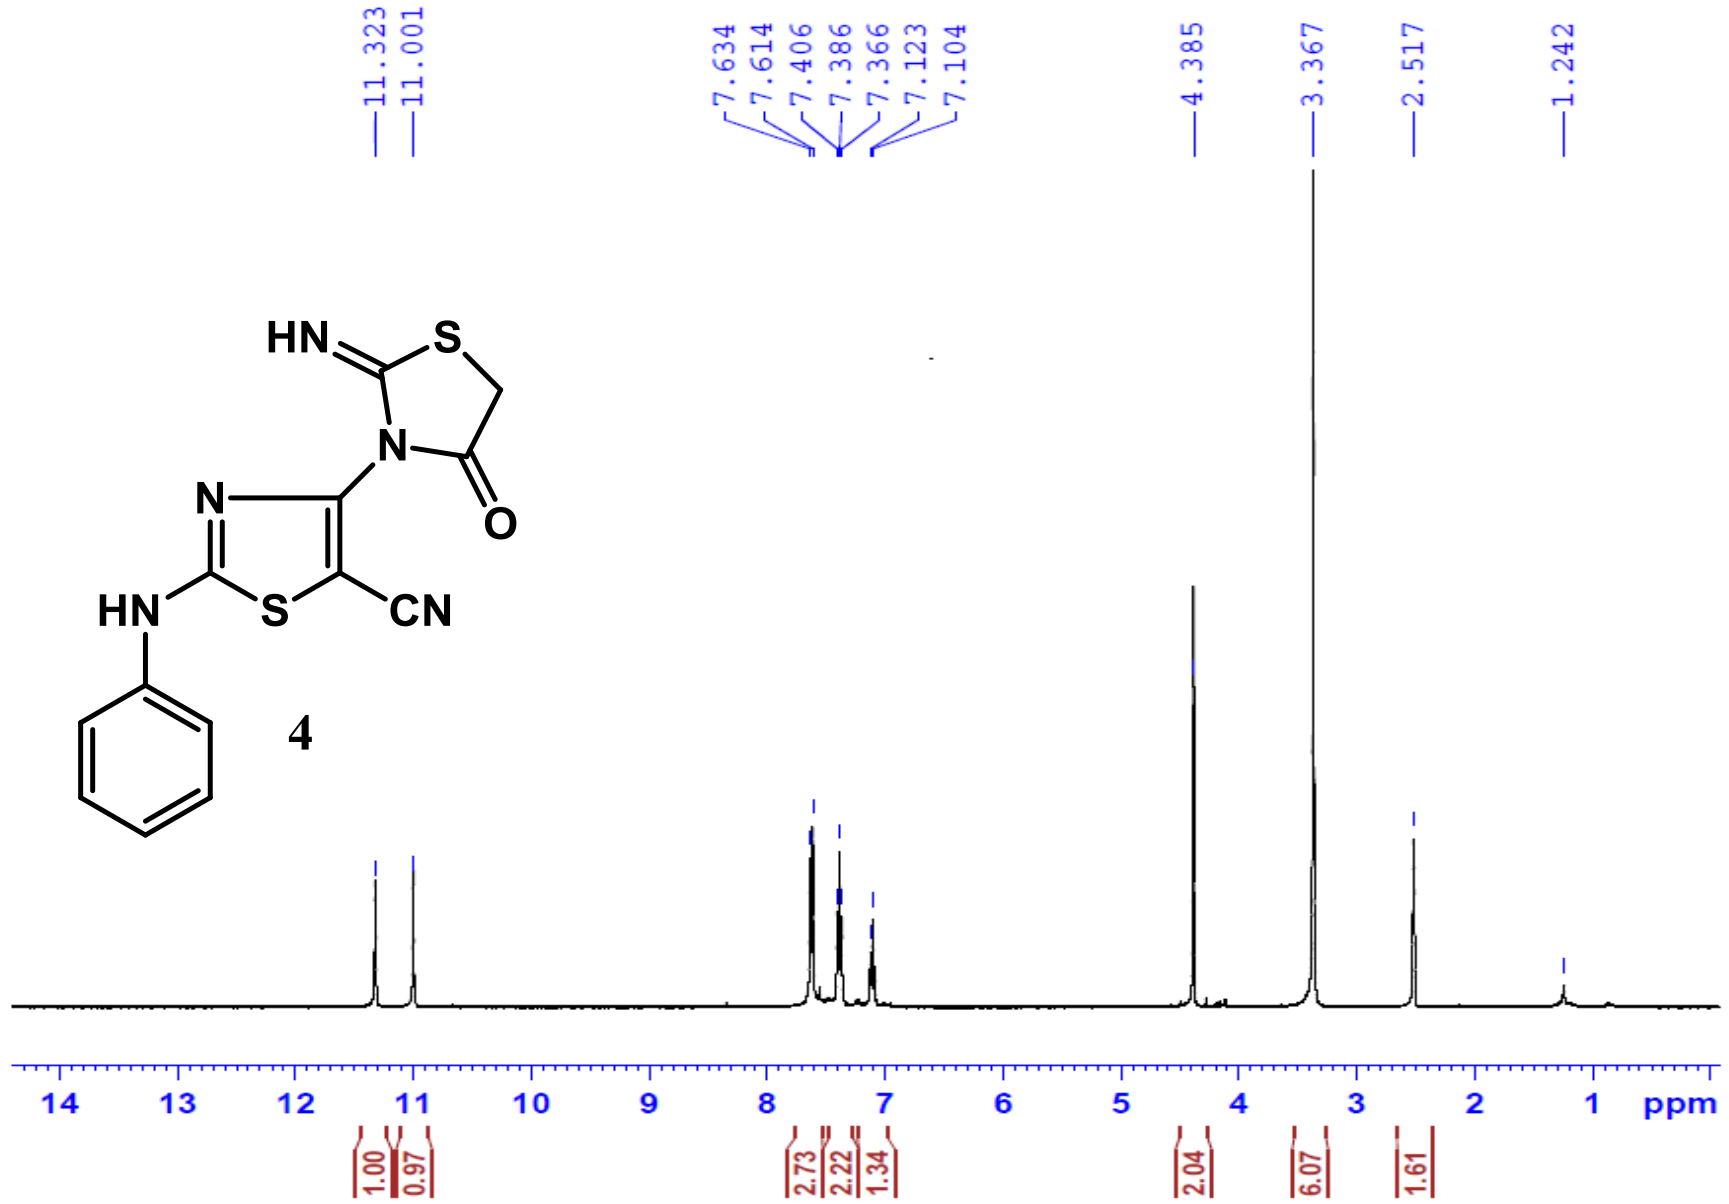

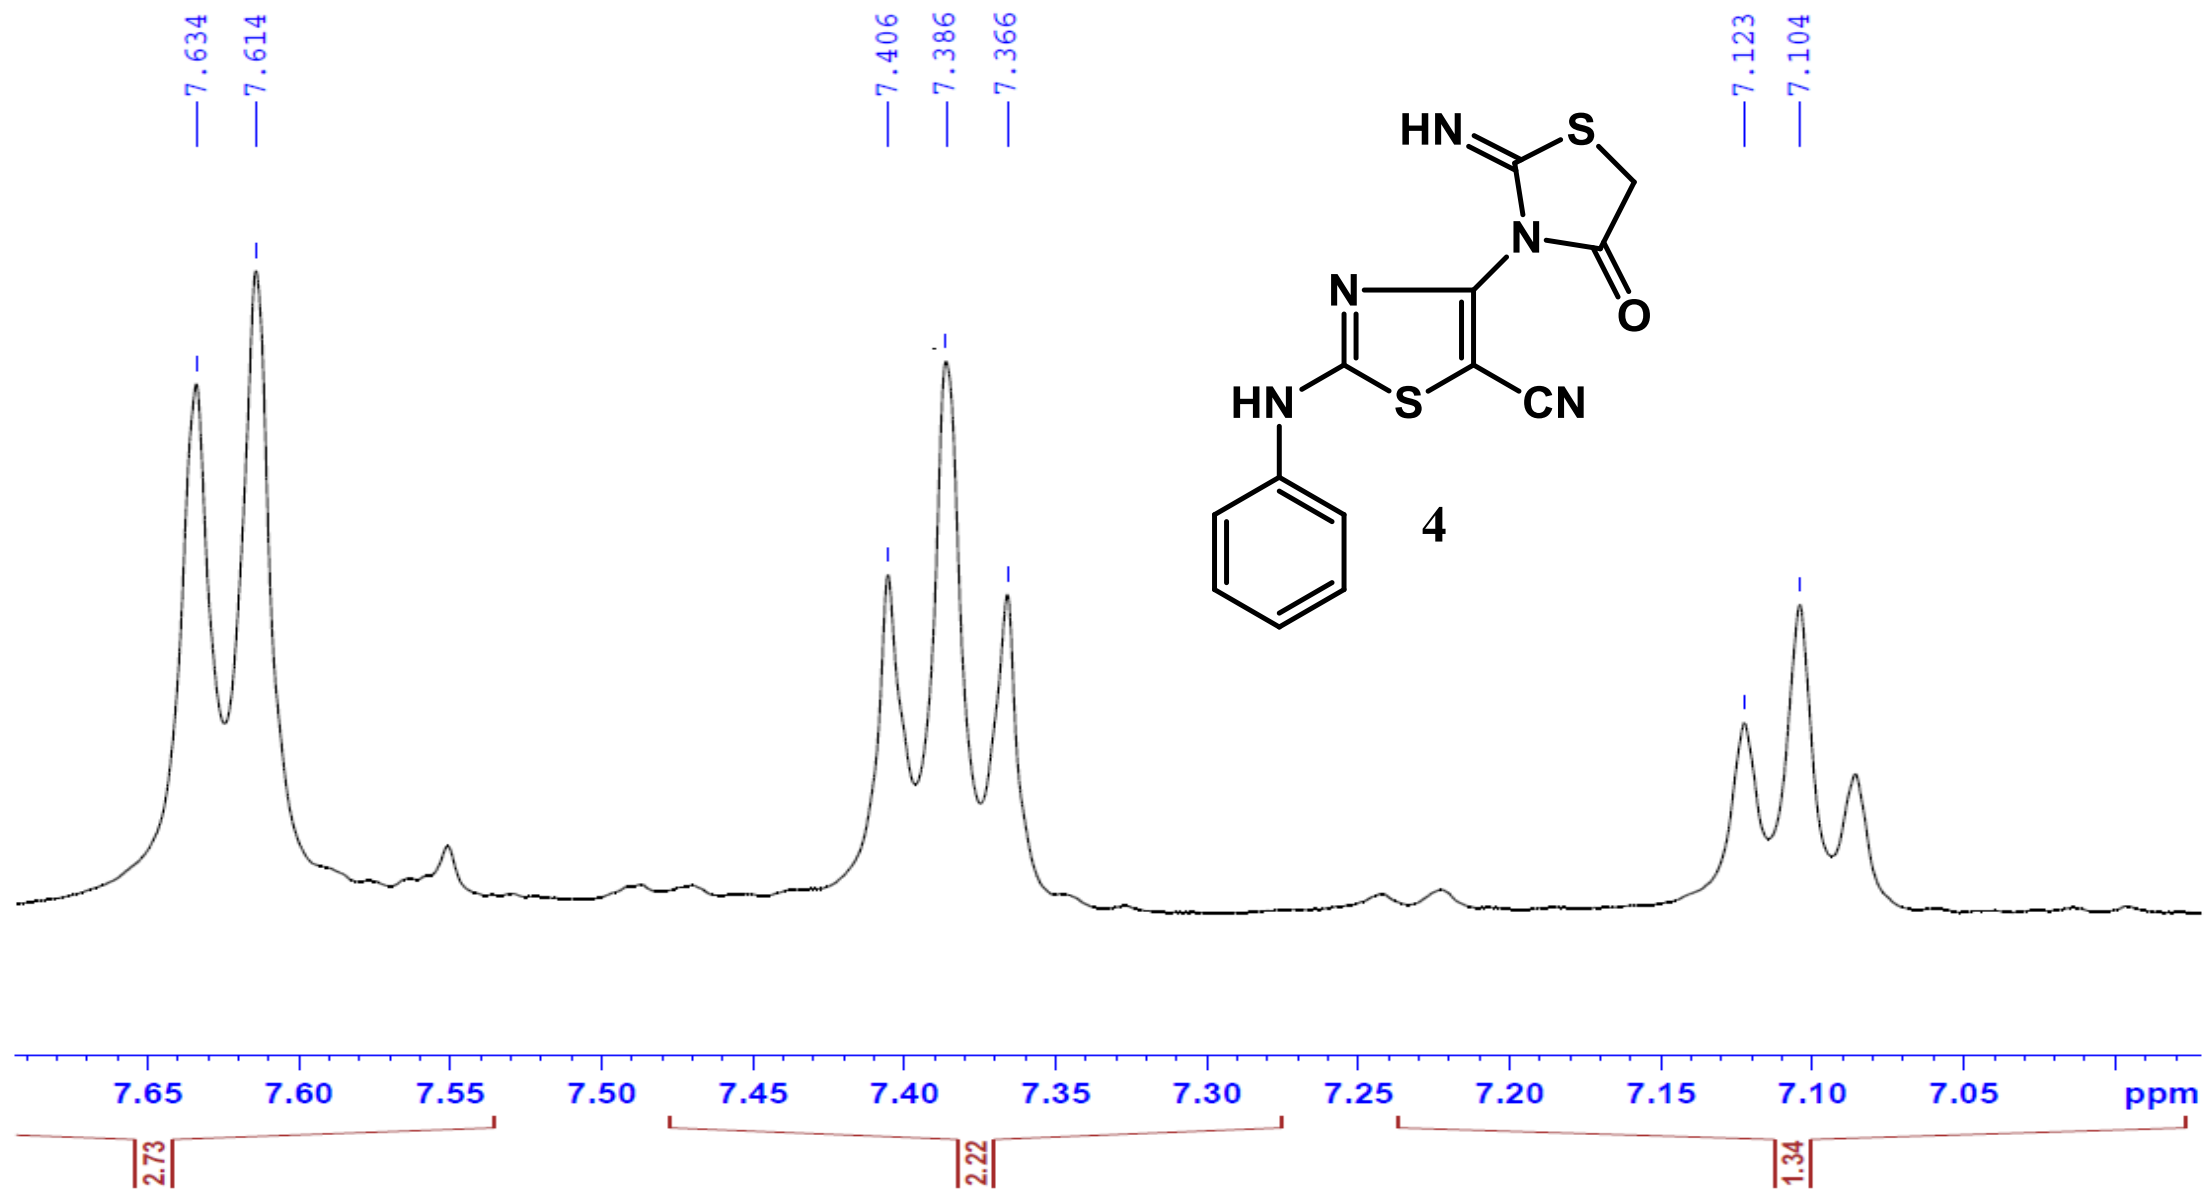

Alaa Abdullah - 12 - C13 - T

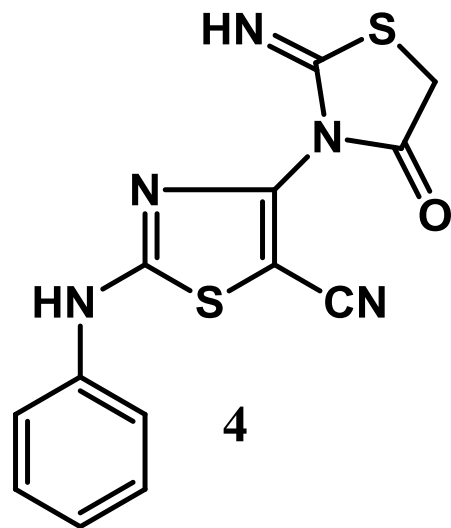

180.8208  
164.9187  
164.4798  
151.0414  
139.8444  
129.6935  
123.8778  
118.8865  
113.1780

77.7372

43.2238  
40.5392  
40.3307  
40.1221  
39.9132  
39.7045  
39.4958  
39.2872

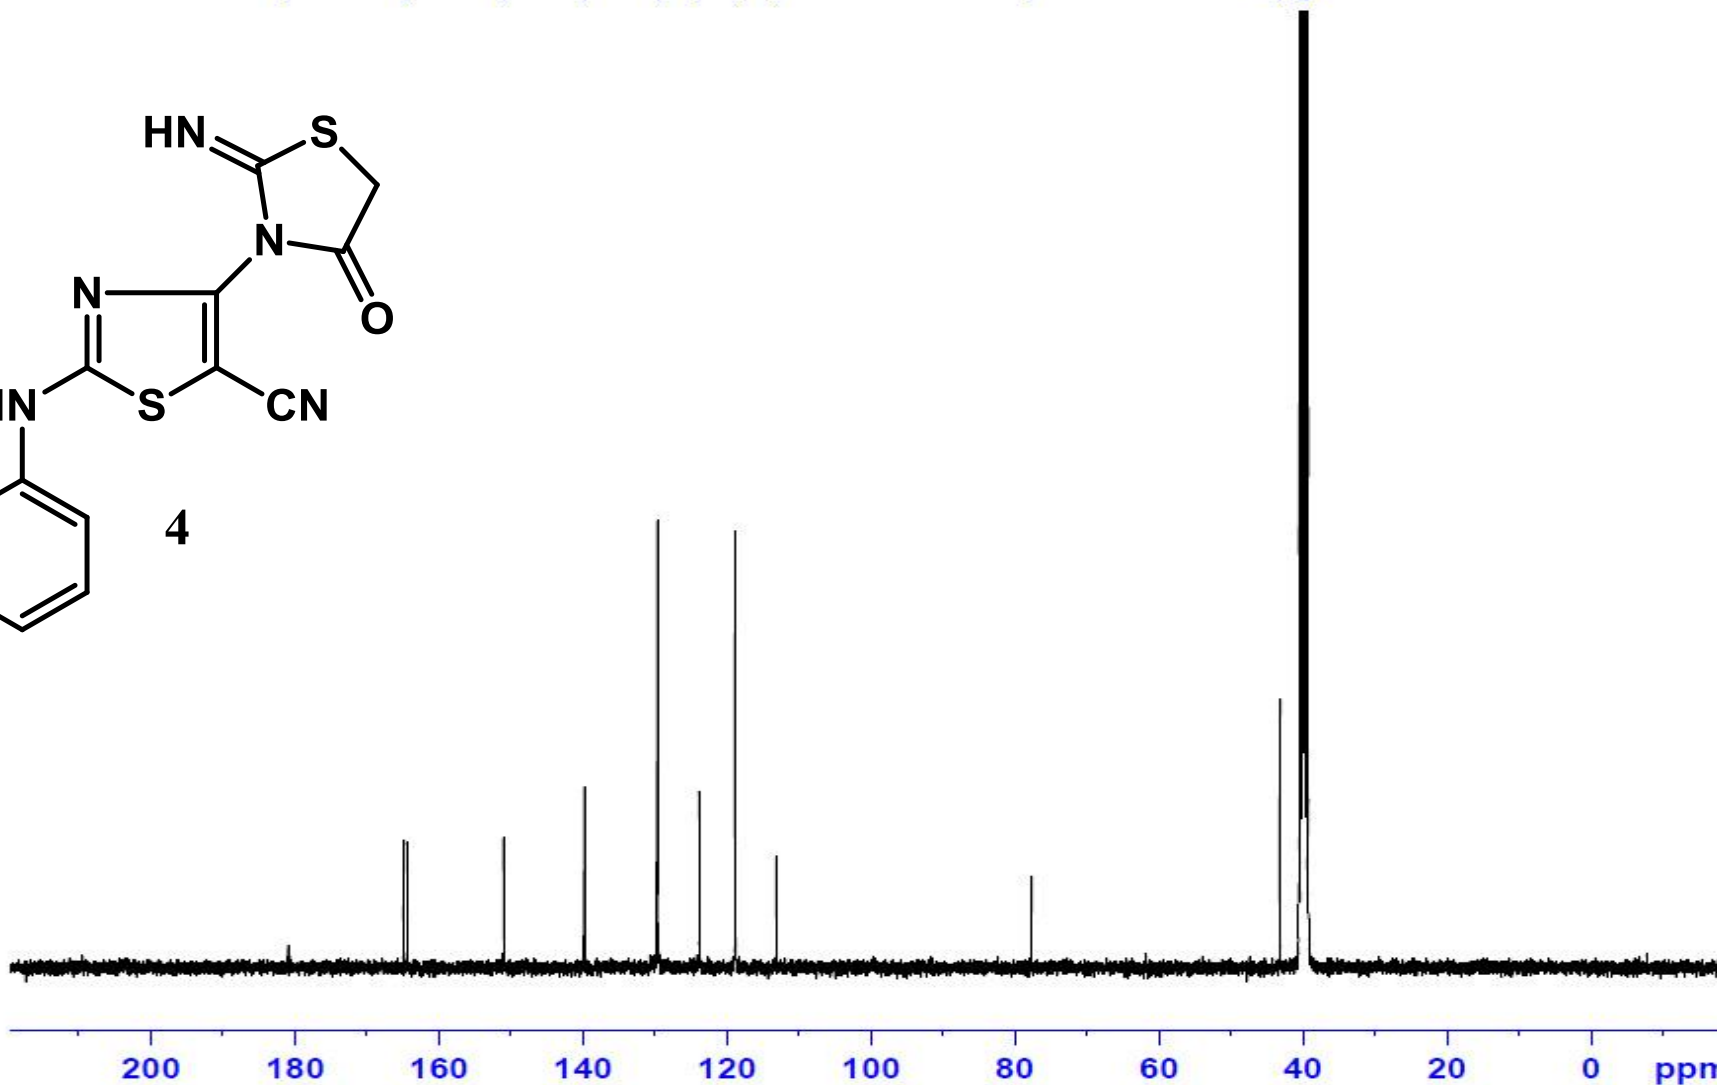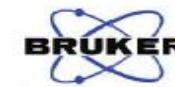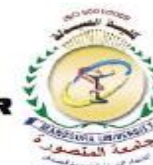

Faculty of Pharmacy

Current Data Parameters  
NAME Alaa Abdullah - 12 - C13 - T  
EXPNO 10  
PROCNO 1

F2 - Acquisition Parameters  
Date\_ 20220516  
Time 18:36 h  
INSTRUM spect  
PROBHD Z108618\_094S (   
PULPROG zgpg30  
TD 65536  
SOLVENT DMSO  
NS 2100  
DS 4  
SWH 24038.461 Hz  
FIDRES 0.733596 Hz  
AQ 1.3631488 sec  
RG 197.77  
DW 20.800 usec  
DE 6.50 usec  
TE 296.3 K  
D1 2.00000000 sec  
D11 0.03000000 sec  
TD0 1  
SFO1 100.6404331 MHz  
NUC1 13C  
P1 10.00 usec  
PLW1 47.00000000 W  
SFO2 400.2016008 MHz  
NUC2 1H  
PCPD2[2] waltz16  
PCPD2 90.00 usec  
PLW2 13.00000000 W  
PLW12 0.29249999 W  
PLW13 0.14713000 W

F2 - Processing parameters  
SI 32768  
SF 100.6303700 MHz  
WDW EM  
SSB 0  
LB 1.00 Hz  
GB 0  
PC 1.40

10

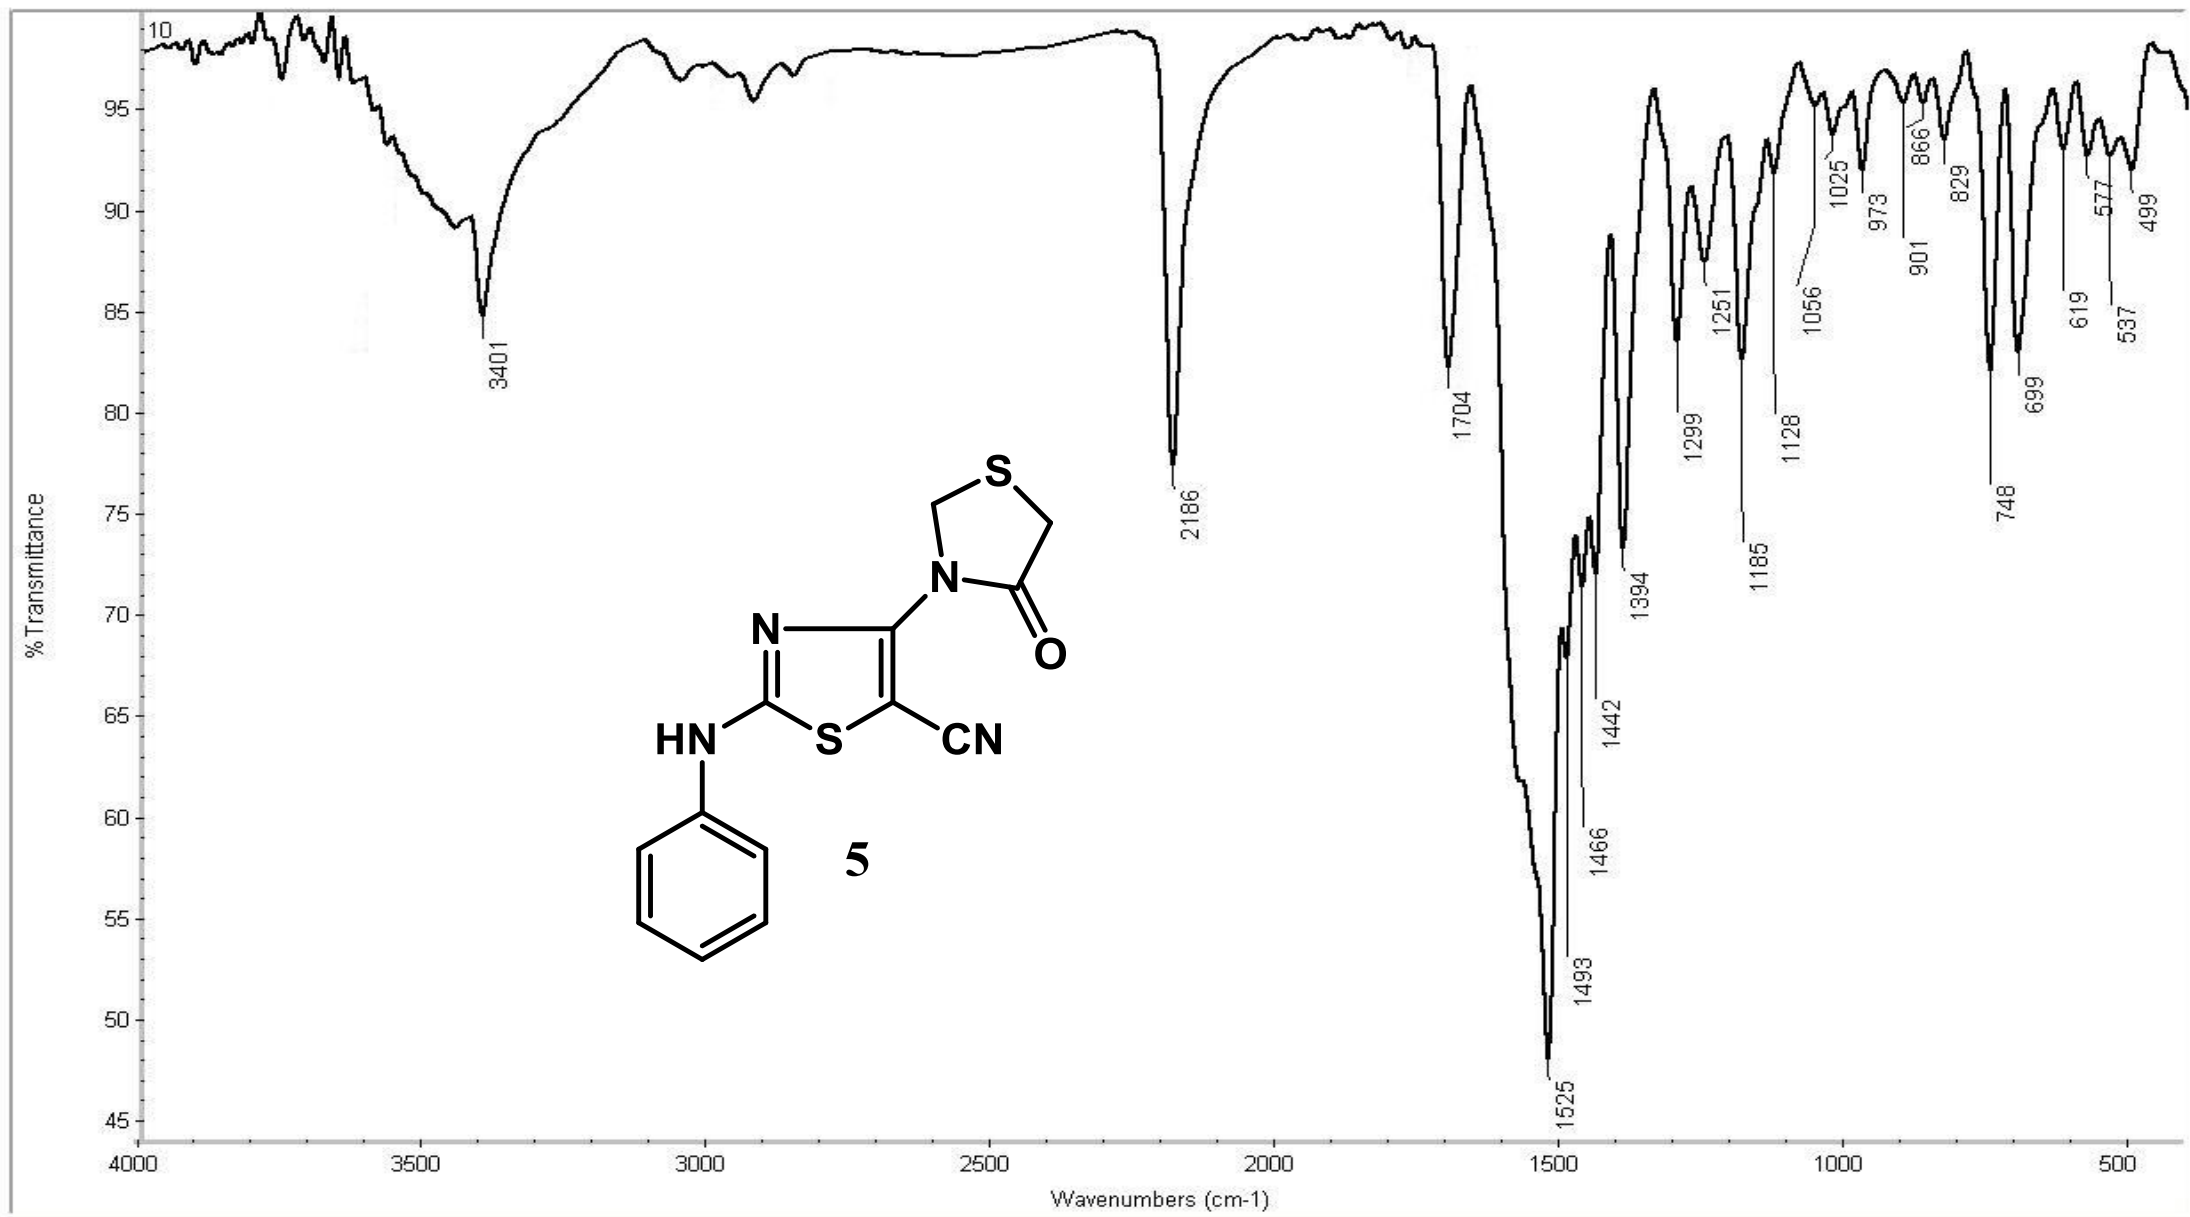

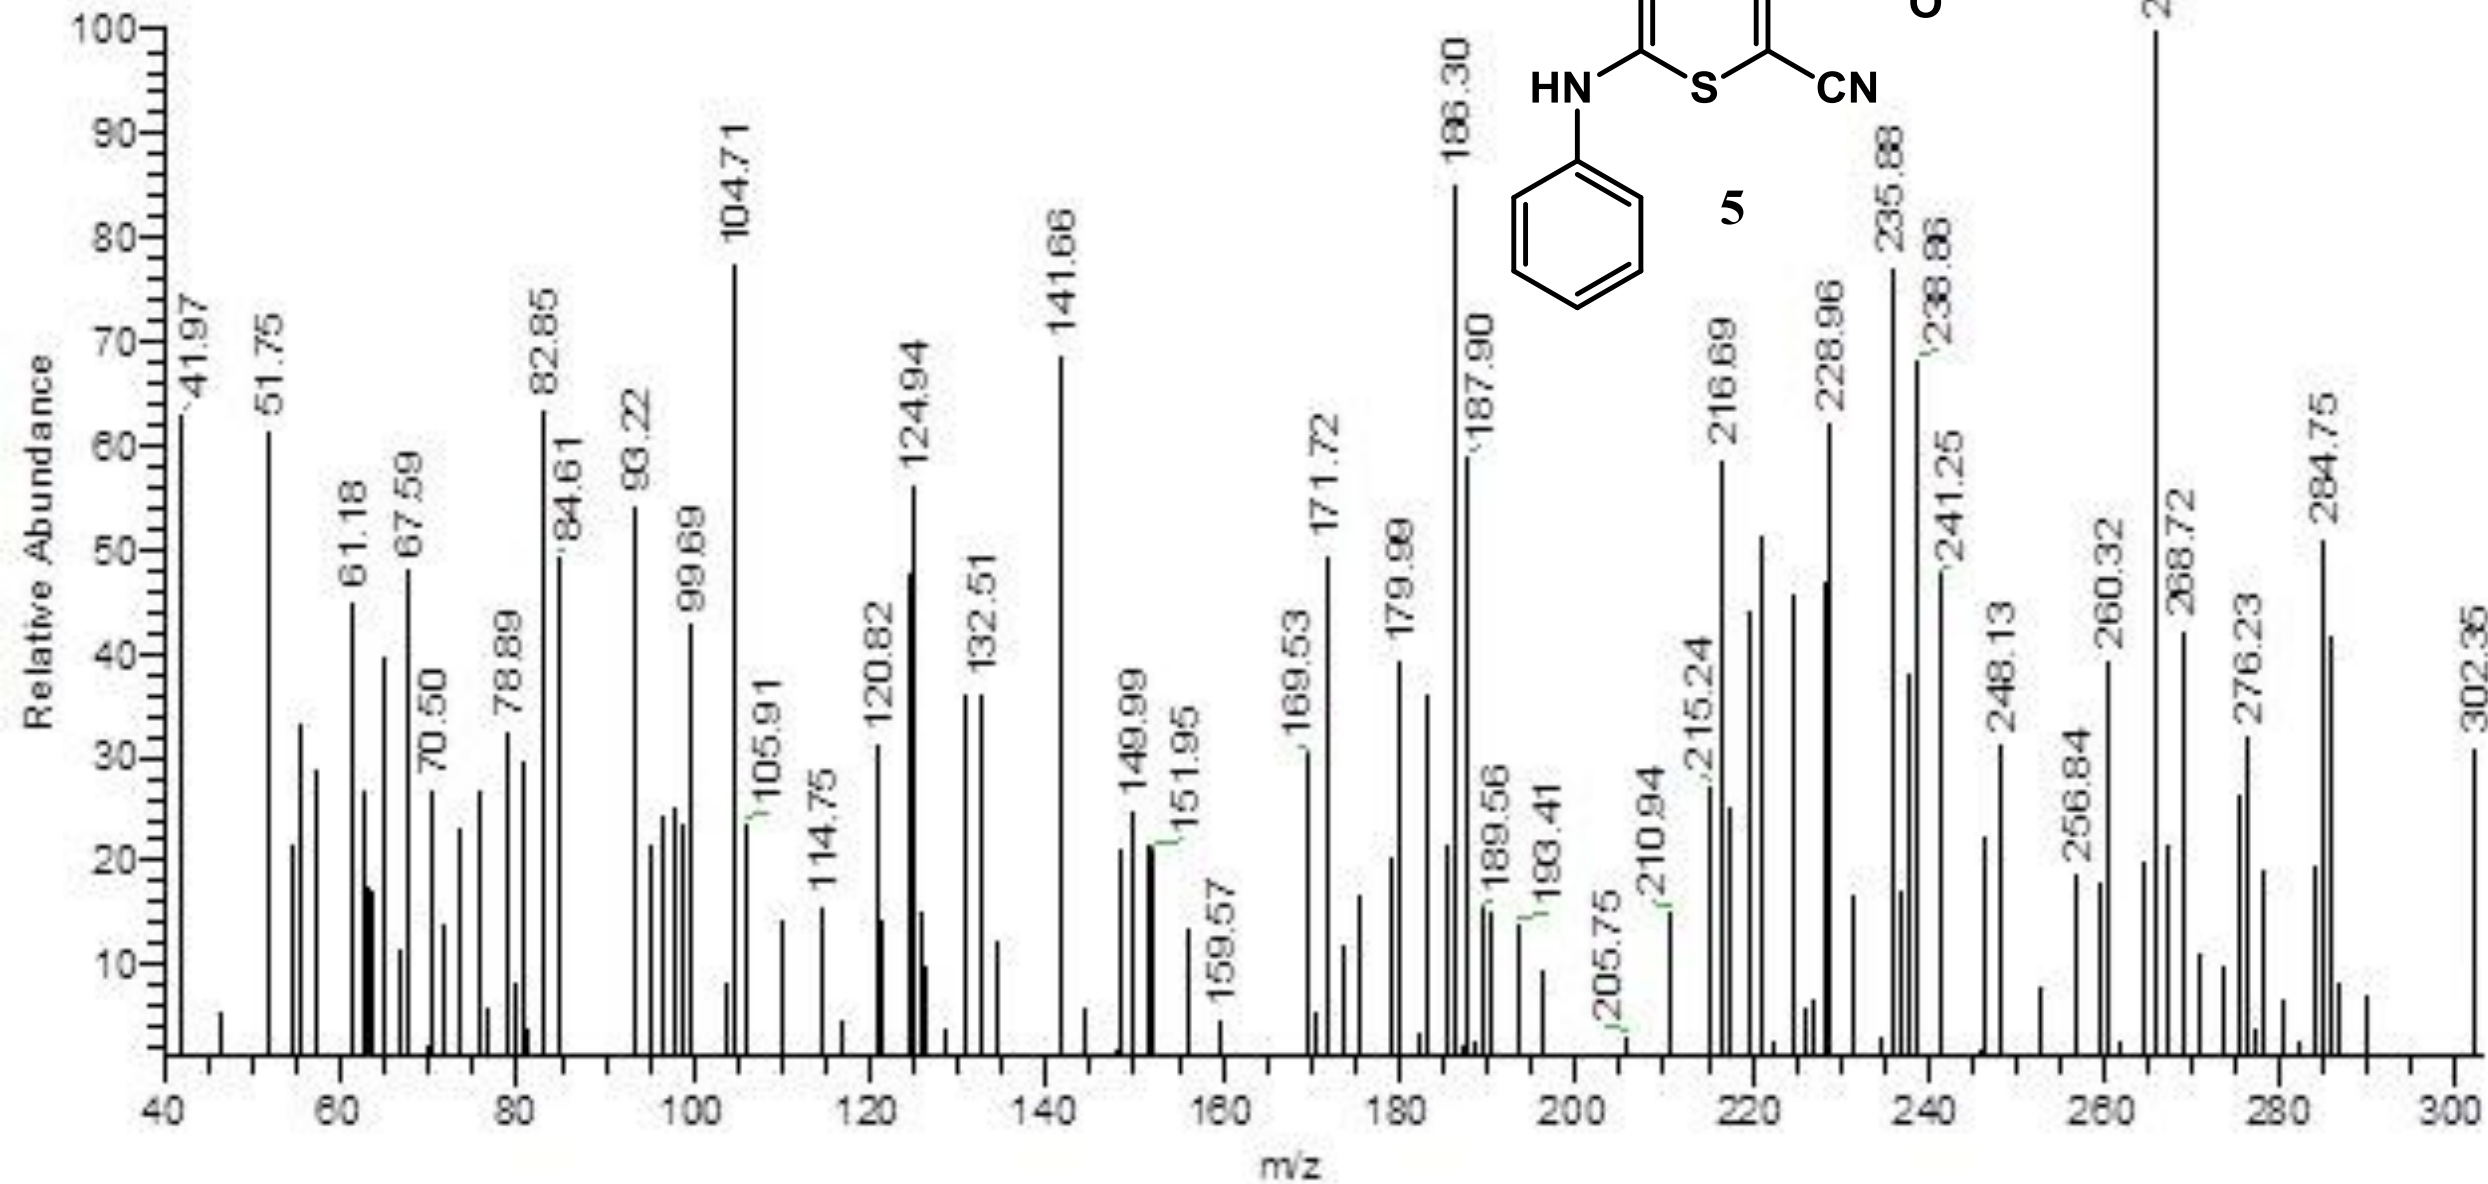



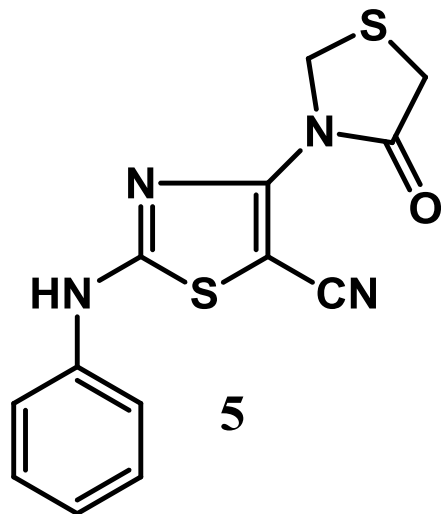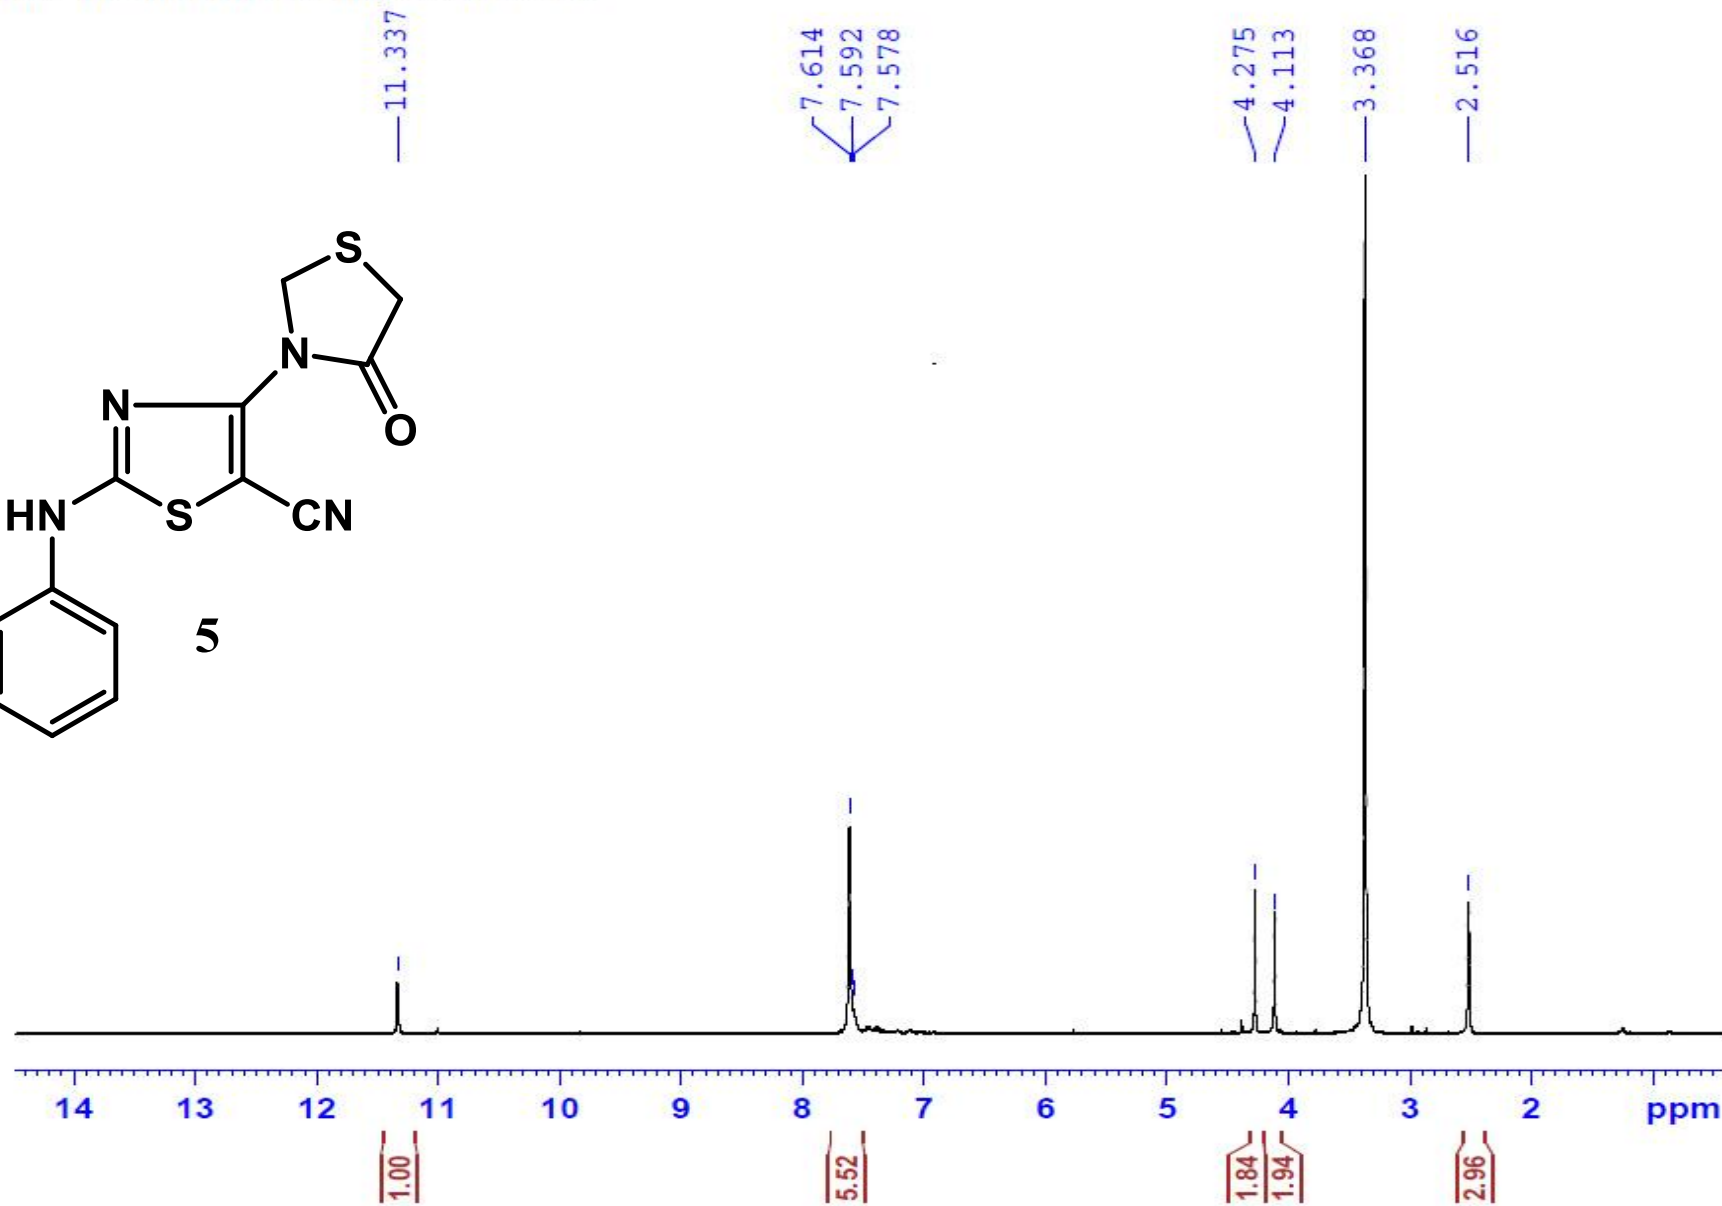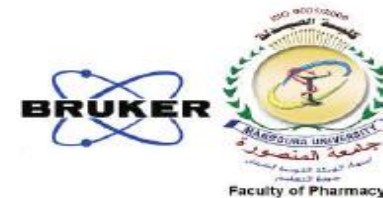

Current Data Parameters  
 NAME Alaa Abdullah-11-HNMF  
 EXPNO 10  
 PROCNO 1

F2 - Acquisition Parameters  
 Date\_ 20220510  
 Time\_ 15.37 h  
 INSTRUM spect  
 PROBHD Z108618\_0945 ( )  
 PULPROG zg30  
 TD 65536  
 SOLVENT DMSO  
 NS 16  
 DS 2  
 SWH 8012.820 Hz  
 FIDRES 0.244532 Hz  
 AQ 4.0894465 sec  
 RG 176.72  
 DW 62.400 usec  
 DE 6.50 usec  
 TE 295.4 K  
 D1 1.00000000 sec  
 TD0 1  
 SFO1 400.2024712 MHz  
 NUC1 1H  
 P1 13.50 usec  
 PLW1 13.00000000 W

F2 - Processing parameters  
 SI 65536  
 SF 400.200000 MHz  
 WDW EM  
 SSB 0  
 LB 0.30 Hz  
 GB 0  
 PC 1.00

Alaa Abdullah - 11 - C13 - T

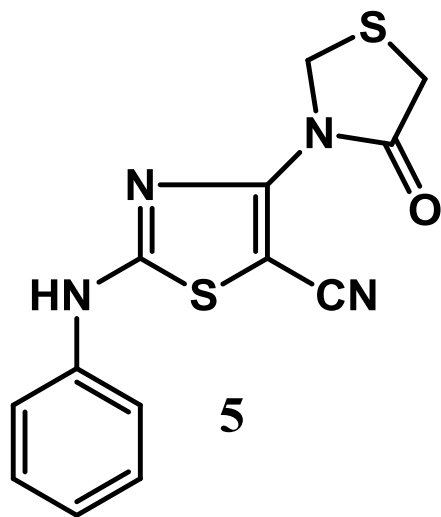

167.9487  
165.0603

148.6864

137.2500

130.7328

129.6389

118.8926

112.9950

85.8328

43.0082  
40.5302  
40.3217  
40.1131  
39.9043  
39.6955  
39.4869  
39.2780  
38.3018

200 180 160 140 120 100 80 60 40 20 0 ppm

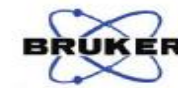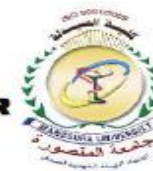

Faculty of Pharmacy

Current Data Parameters  
NAME Alaa Abdullah - 11 - C13 - T  
EXPNO 10  
PROCNO 1

F2 - Acquisition Parameters

Date\_ 20220516  
Time 16:32 h  
INSTRUM spect  
PROBHD Z108618\_0945 (   
PULPROG zgpg30  
TD 65536  
SOLVENT DMSO  
NS 2100  
DS 4  
SWH 24038.461 Hz  
FIDRES 0.733596 Hz  
AQ 1.3631488 sec  
RG 197.77  
DW 20.800 usec  
DE 6.50 usec  
TE 296.0 K  
D1 2.00000000 sec  
D11 0.03000000 sec  
TD0 1  
SFO1 100.6404331 MHz  
NUC1 13C  
P1 10.00 usec  
PLW1 47.00000000 W  
SFO2 400.2016008 MHz  
NUC2 1H  
CPDPRG[2] waltz16  
PCPD2 90.00 usec  
PLW2 13.00000000 W  
PLW12 0.29249999 W  
PLW13 0.14713000 W

F2 - Processing parameters

SI 32768  
SF 100.6303700 MHz  
WDW EM  
SSB 0  
LB 1.00 Hz  
GB 0  
PC 1.40

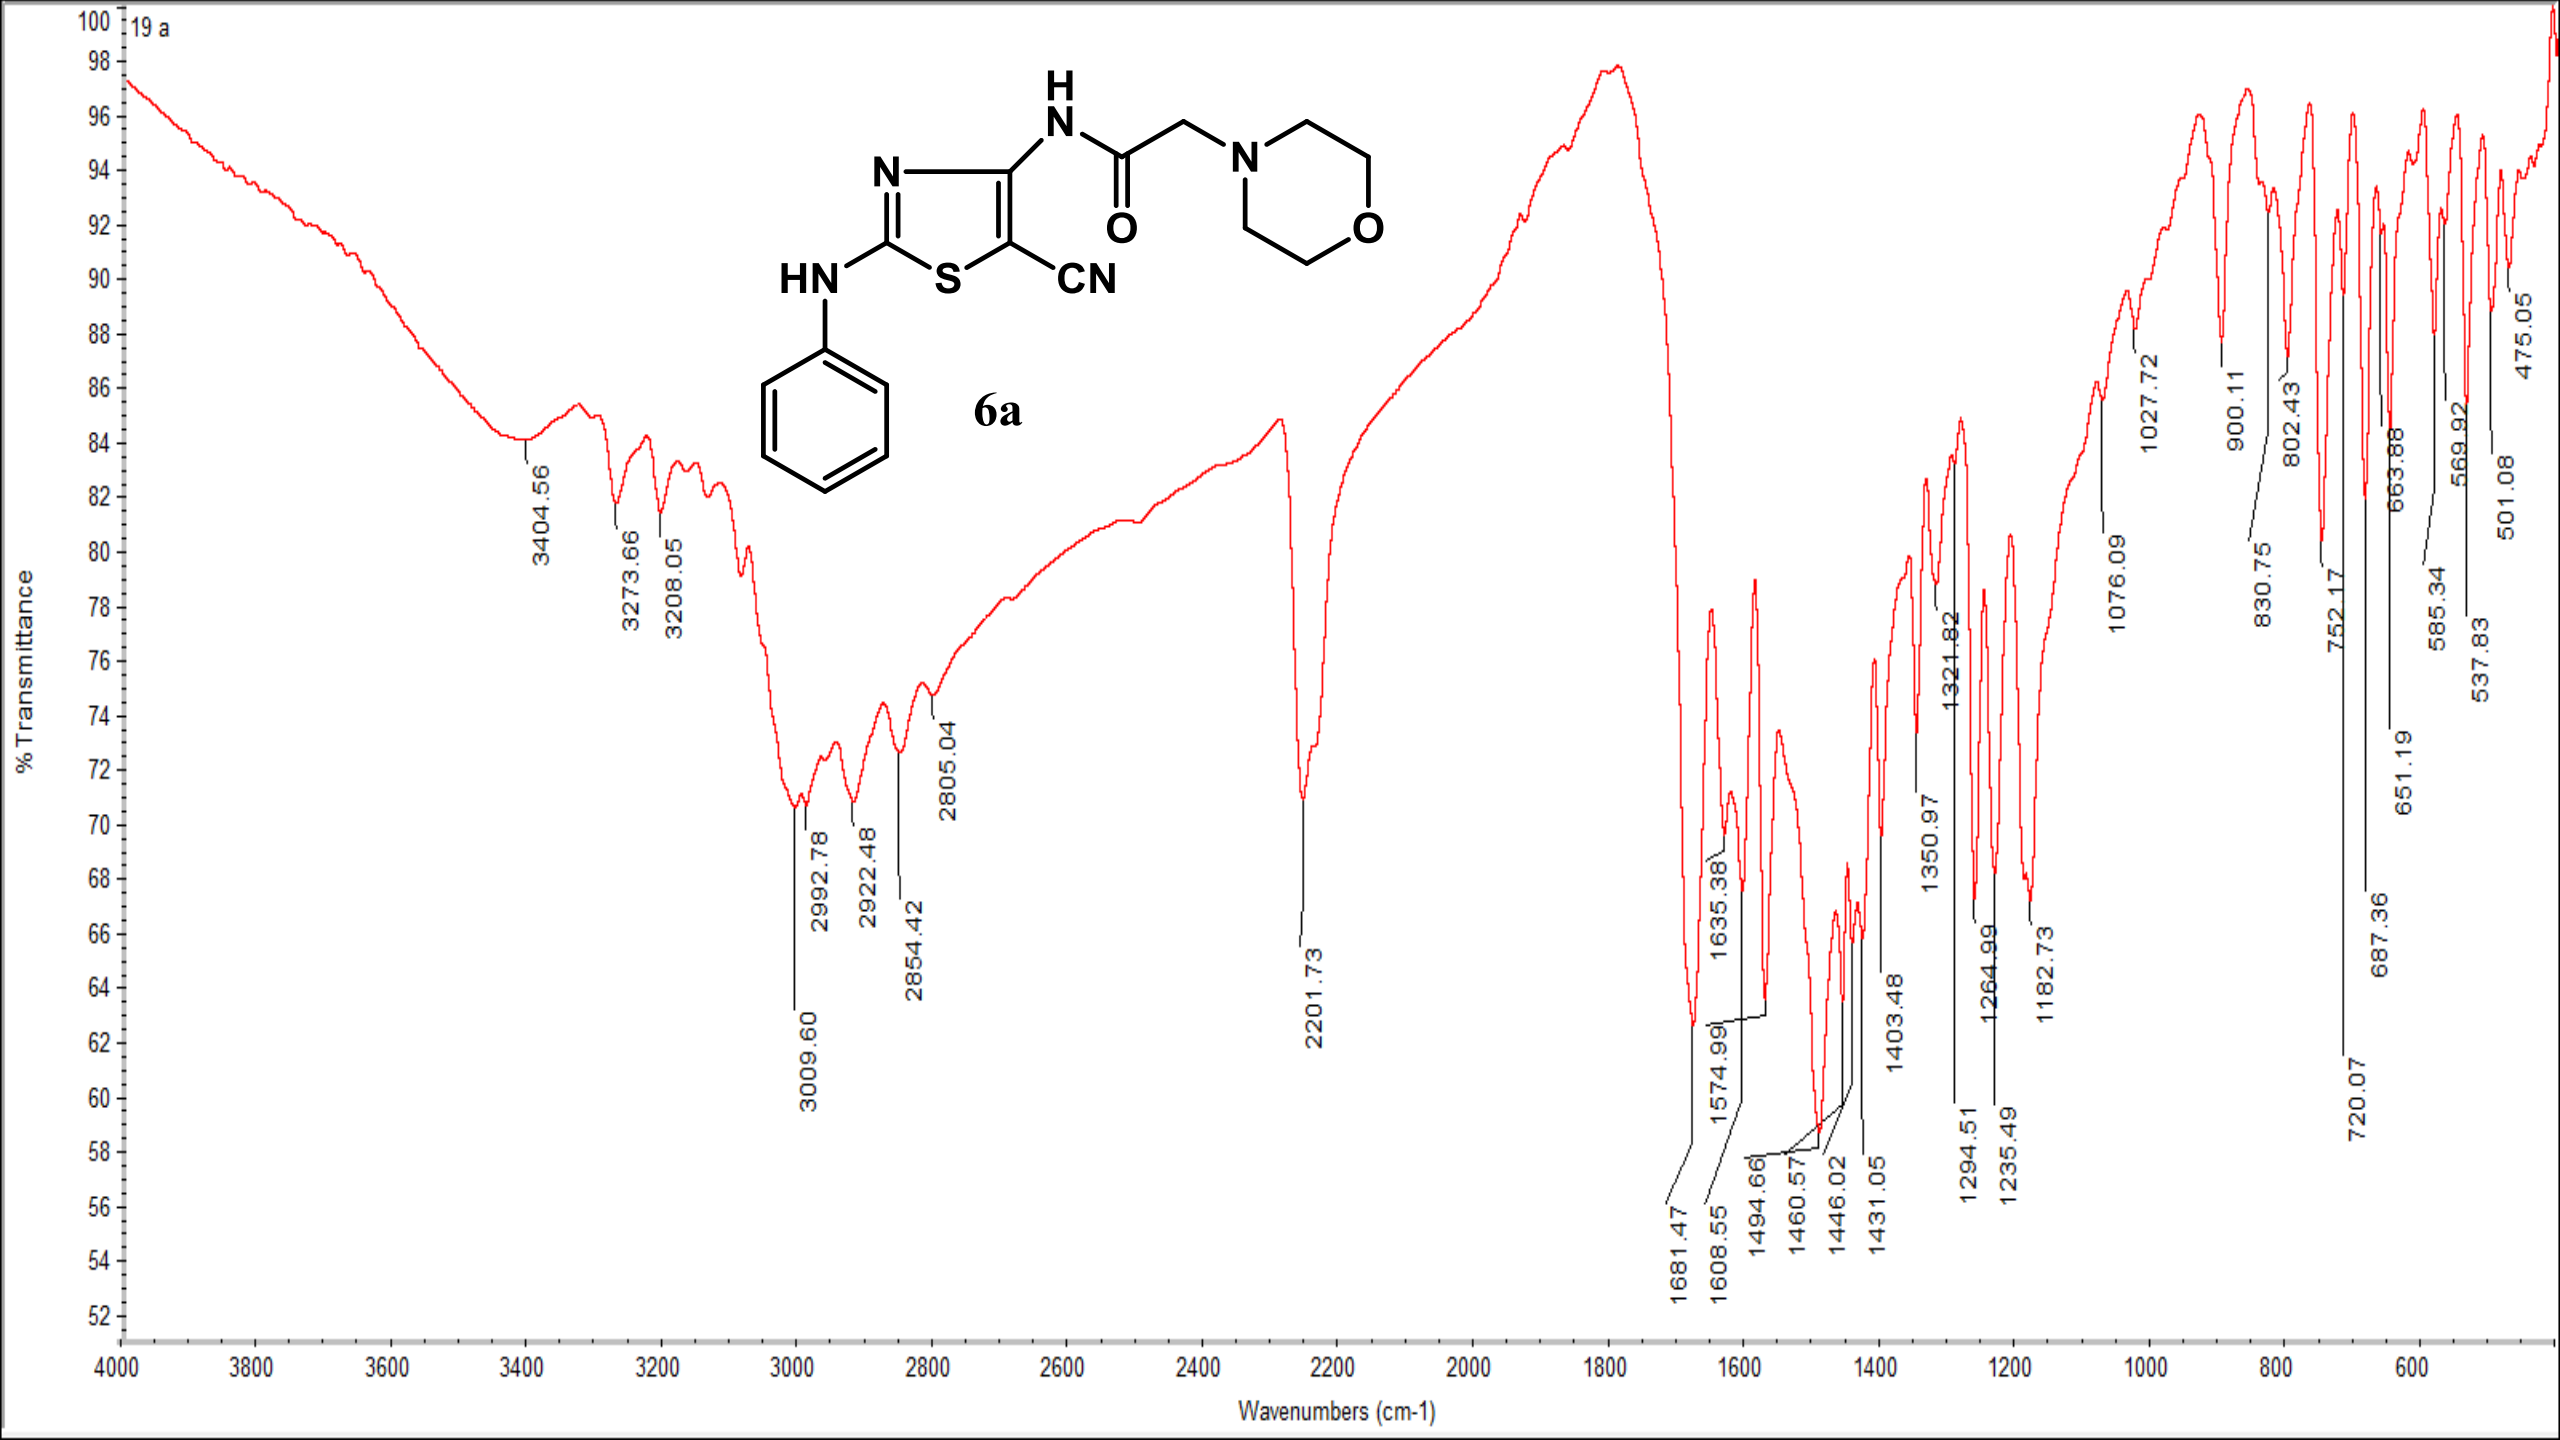

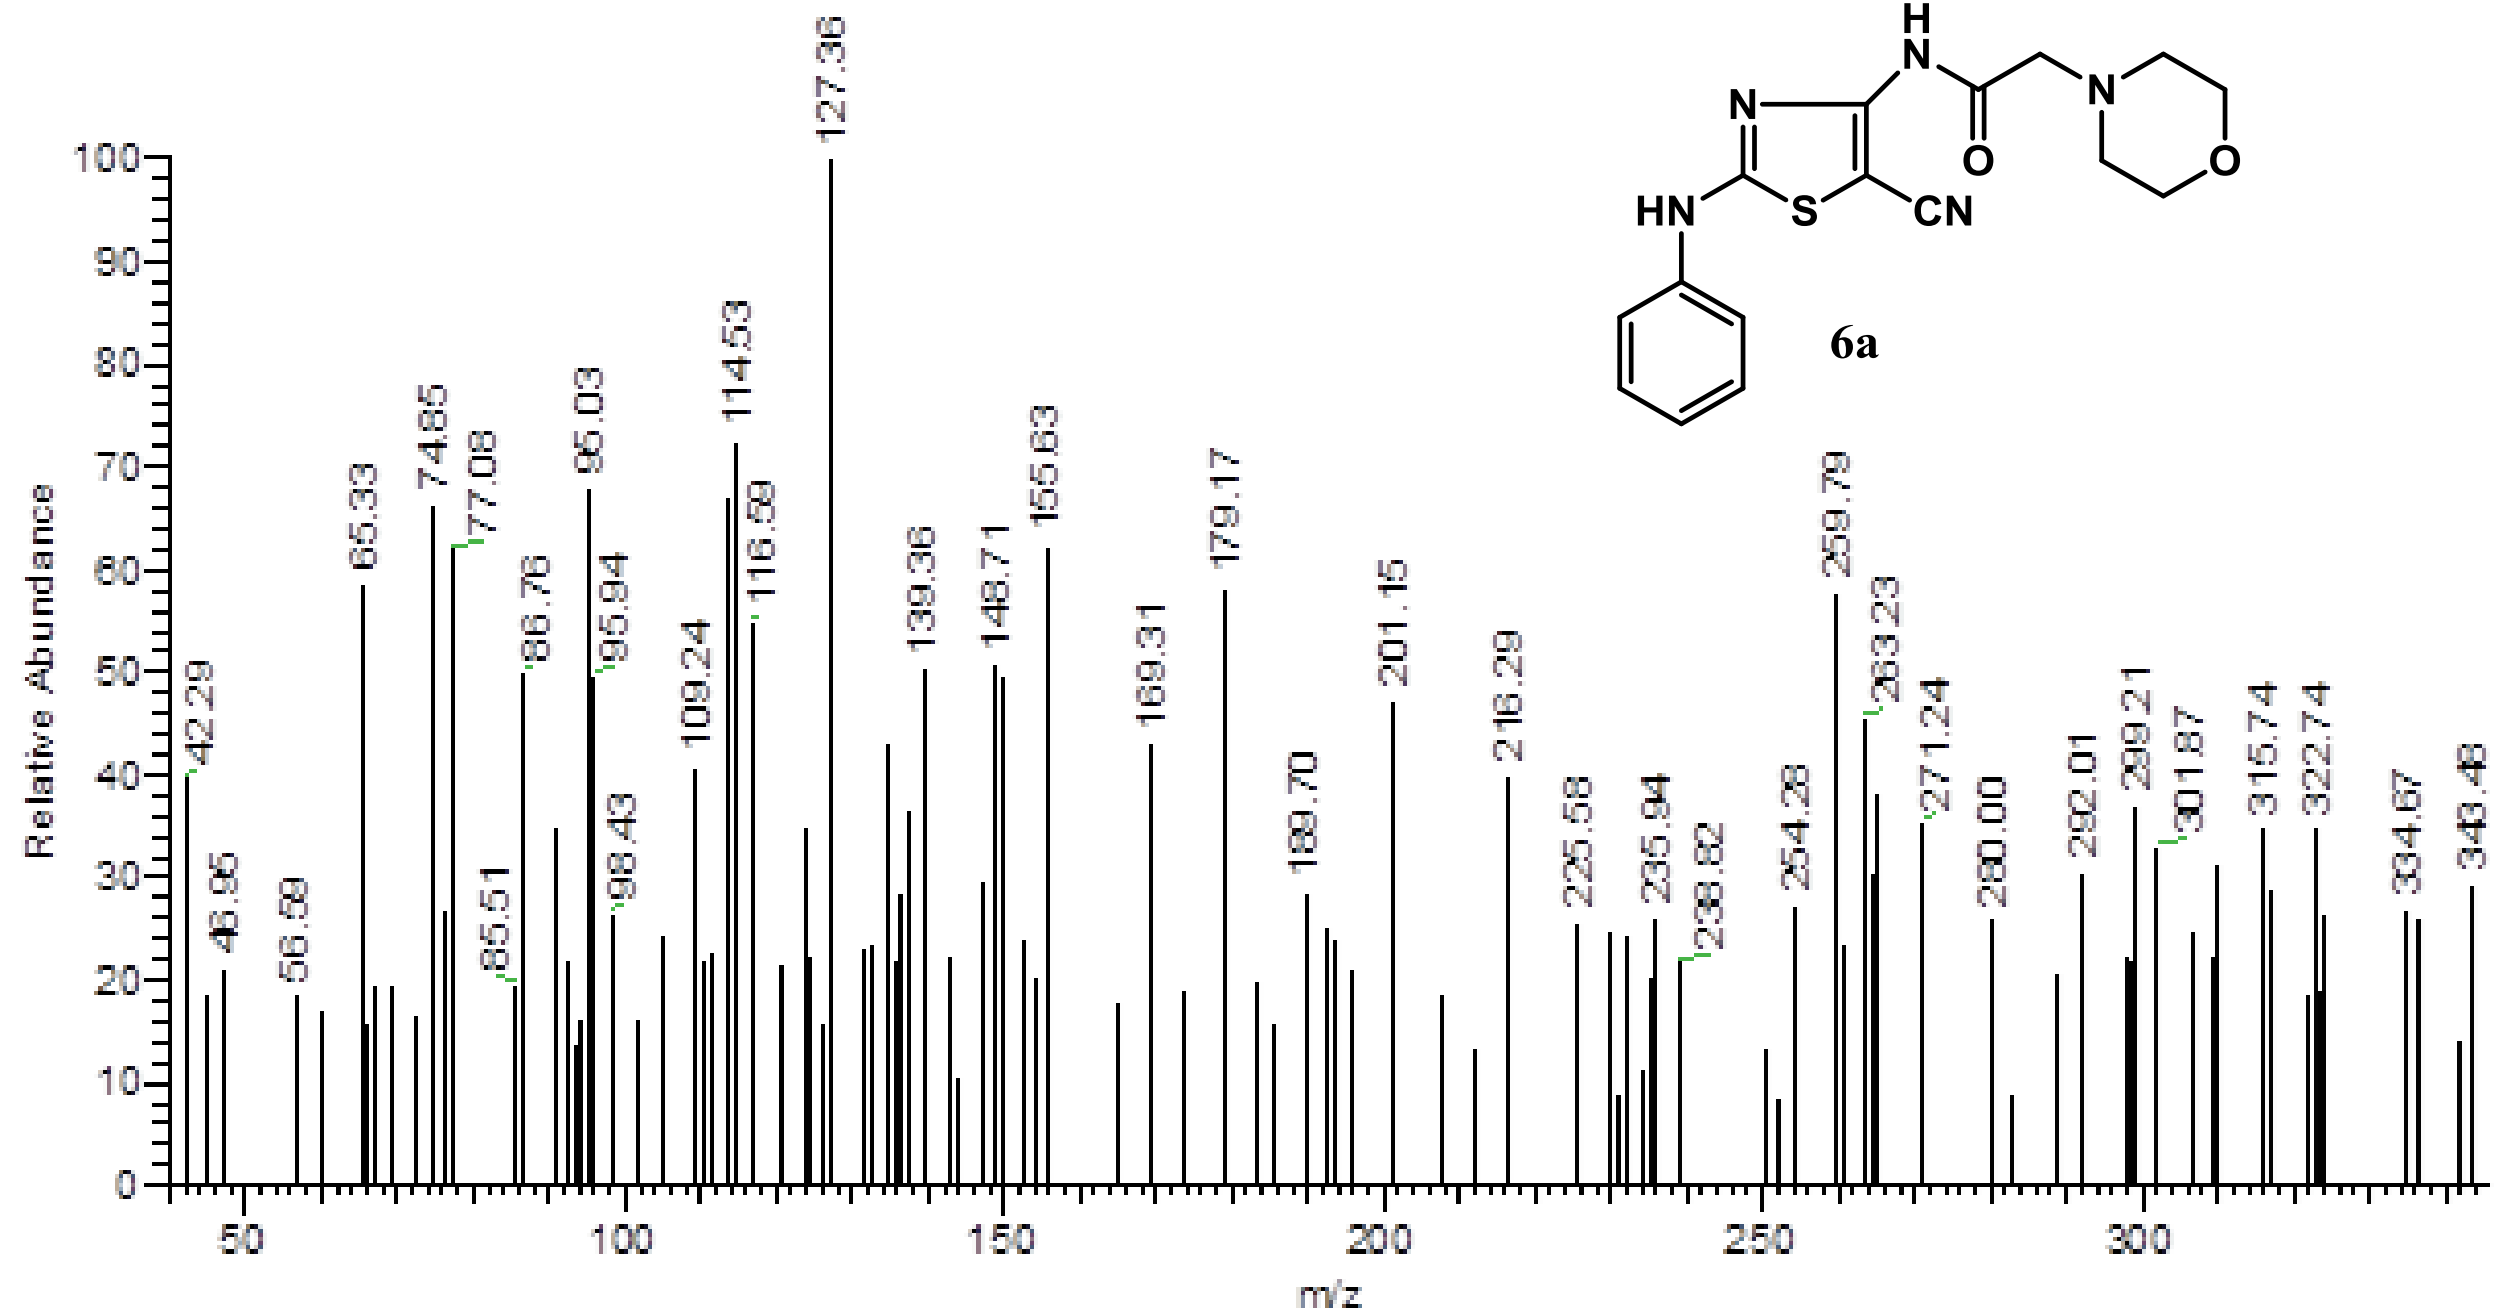

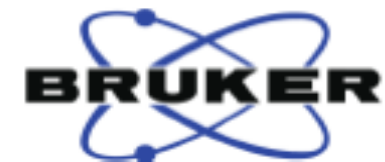

Current Data Parameters  
NAME Feb20-2020-nmr  
EXPNO 20  
PROCNO 1

F2 - Acquisition Parameters  
Date\_ 20200220  
Time 12.34  
INSTRUM spect  
PROBHD 5 mm PABBO BB/  
PULPROG zg30  
TD 65536  
SOLVENT DMSO  
NS 16  
DS 2  
SWH 8012.820 Hz  
FIDRES 0.122266 Hz  
AQ 4.0894465 sec  
RG 77.48  
DW 62.400 usec  
DE 6.50 usec  
TE 298.0 K  
D1 1.00000000 sec  
TD0 1

==== CHANNEL f1 =====  
SFO1 400.1724712 MHz  
NUC1 1H  
P1 10.00 usec  
PLW1 16.50000000 W

F2 - Processing parameters  
SI 65536  
SF 400.1700000 MHz  
WDW EM  
SSB 0  
LB 0.30 Hz  
GB 0  
PC 1.00

10.974  
10.668

7.620  
7.394  
7.111

3.642  
3.349  
3.252  
2.978  
2.547

morpholine-1H-DMSO-2022020

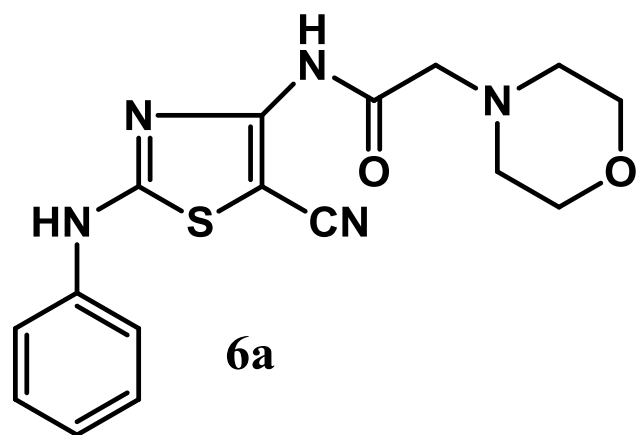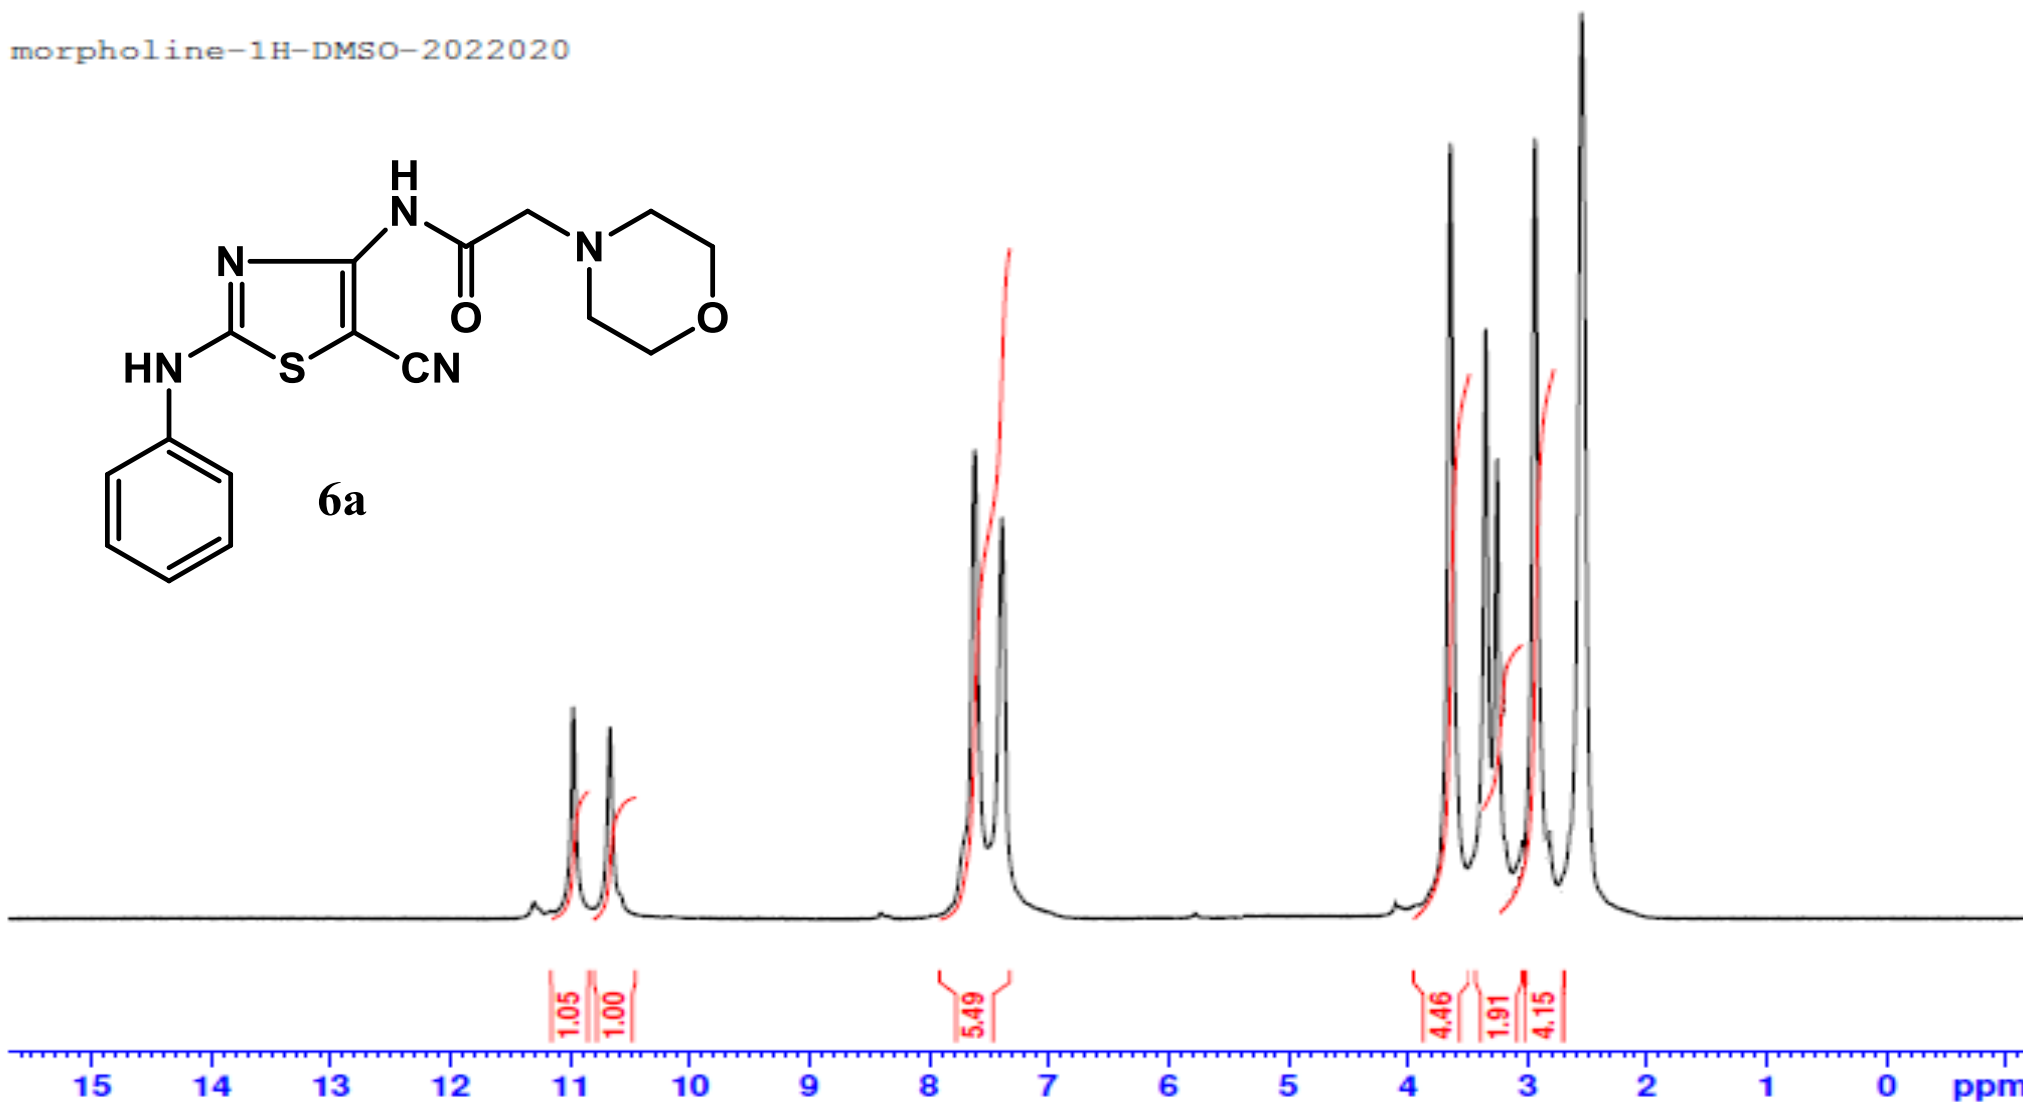

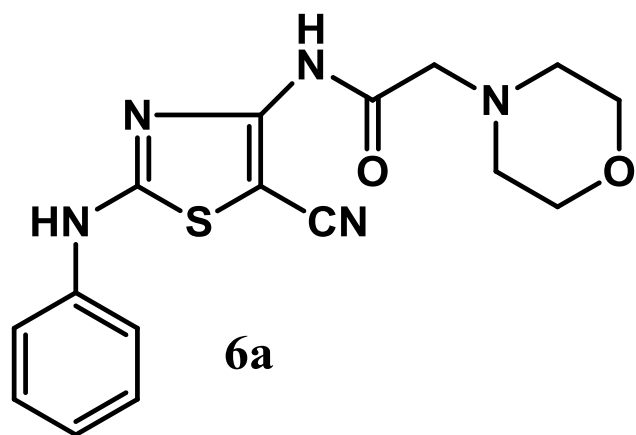

6a

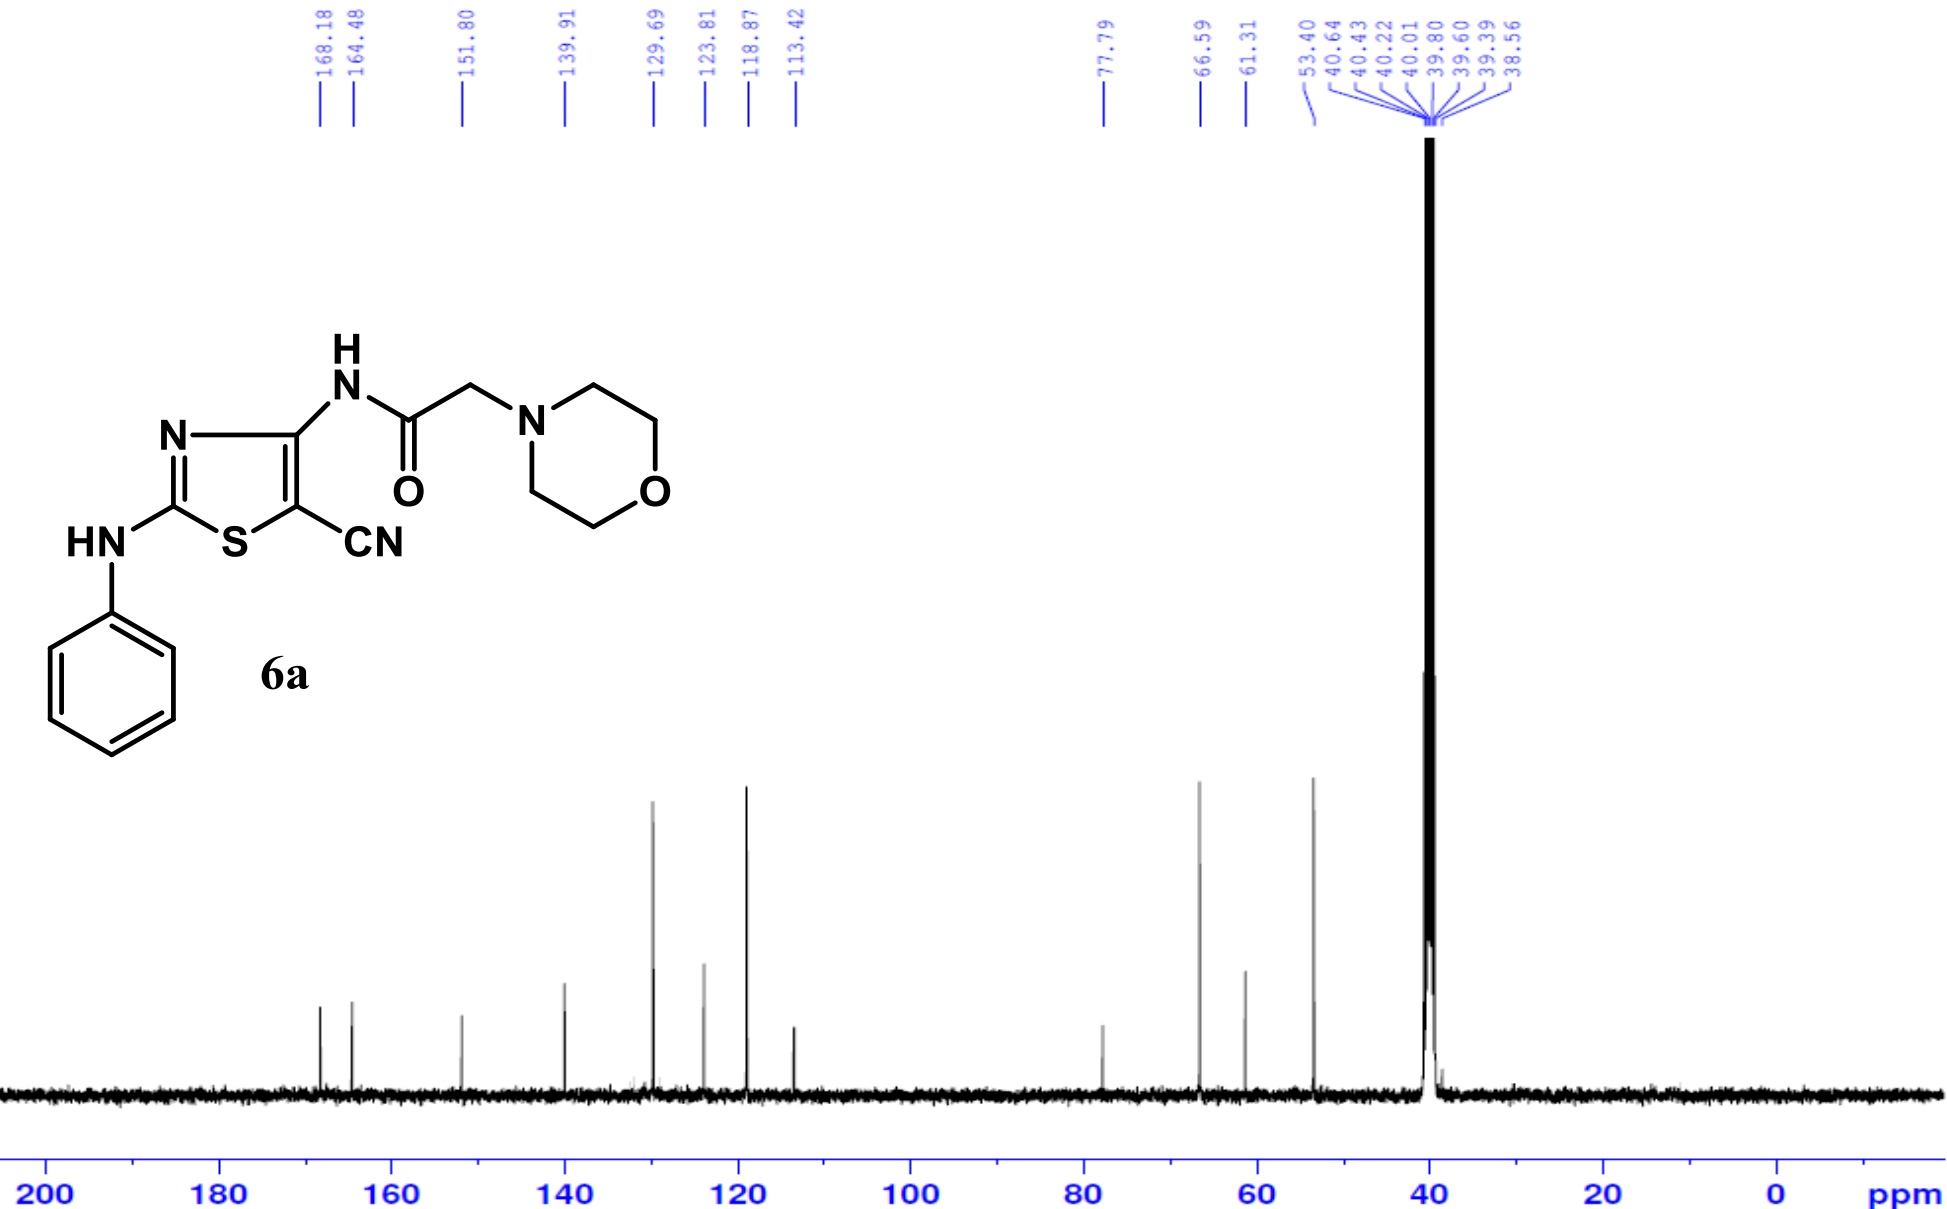

Current Data Parameters  
 NAME Mar01-2020-nmr  
 EXPNO 20  
 PROCNO 1

F2 - Acquisition Parameters  
 Date\_ 20200301  
 Time 13.36  
 INSTRUM spect  
 PROBHD 5 mm PABBO BB/  
 PULPROG zgpg30  
 TD 65536  
 SOLVENT DMSO  
 NS 1024  
 DS 4  
 SWH 24038.461 Hz  
 FIDRES 0.366798 Hz  
 AQ 1.3631488 sec  
 RG 194.81  
 DW 20.800 usec  
 DE 6.50 usec  
 TE 300.0 K  
 D1 2.00000000 sec  
 D11 0.03000000 sec  
 TD0 1

===== CHANNEL f1 =====  
 SFO1 100.6328883 MHz  
 NUC1 13C  
 P1 10.00 usec  
 PLW1 66.00000000 W

===== CHANNEL f2 =====  
 SFO2 400.1716007 MHz  
 NUC2 1H  
 CPDPRG[2] waltz16  
 PCPD2 90.00 usec  
 PLW2 16.50000000 W  
 PLW12 0.20370001 W  
 PLW13 0.16500001 W

F2 - Processing parameters  
 SI 32768  
 SF 100.6228270 MHz  
 WDW EM  
 SSB 0  
 LB 1.00 Hz  
 GB 0  
 PC 1.40

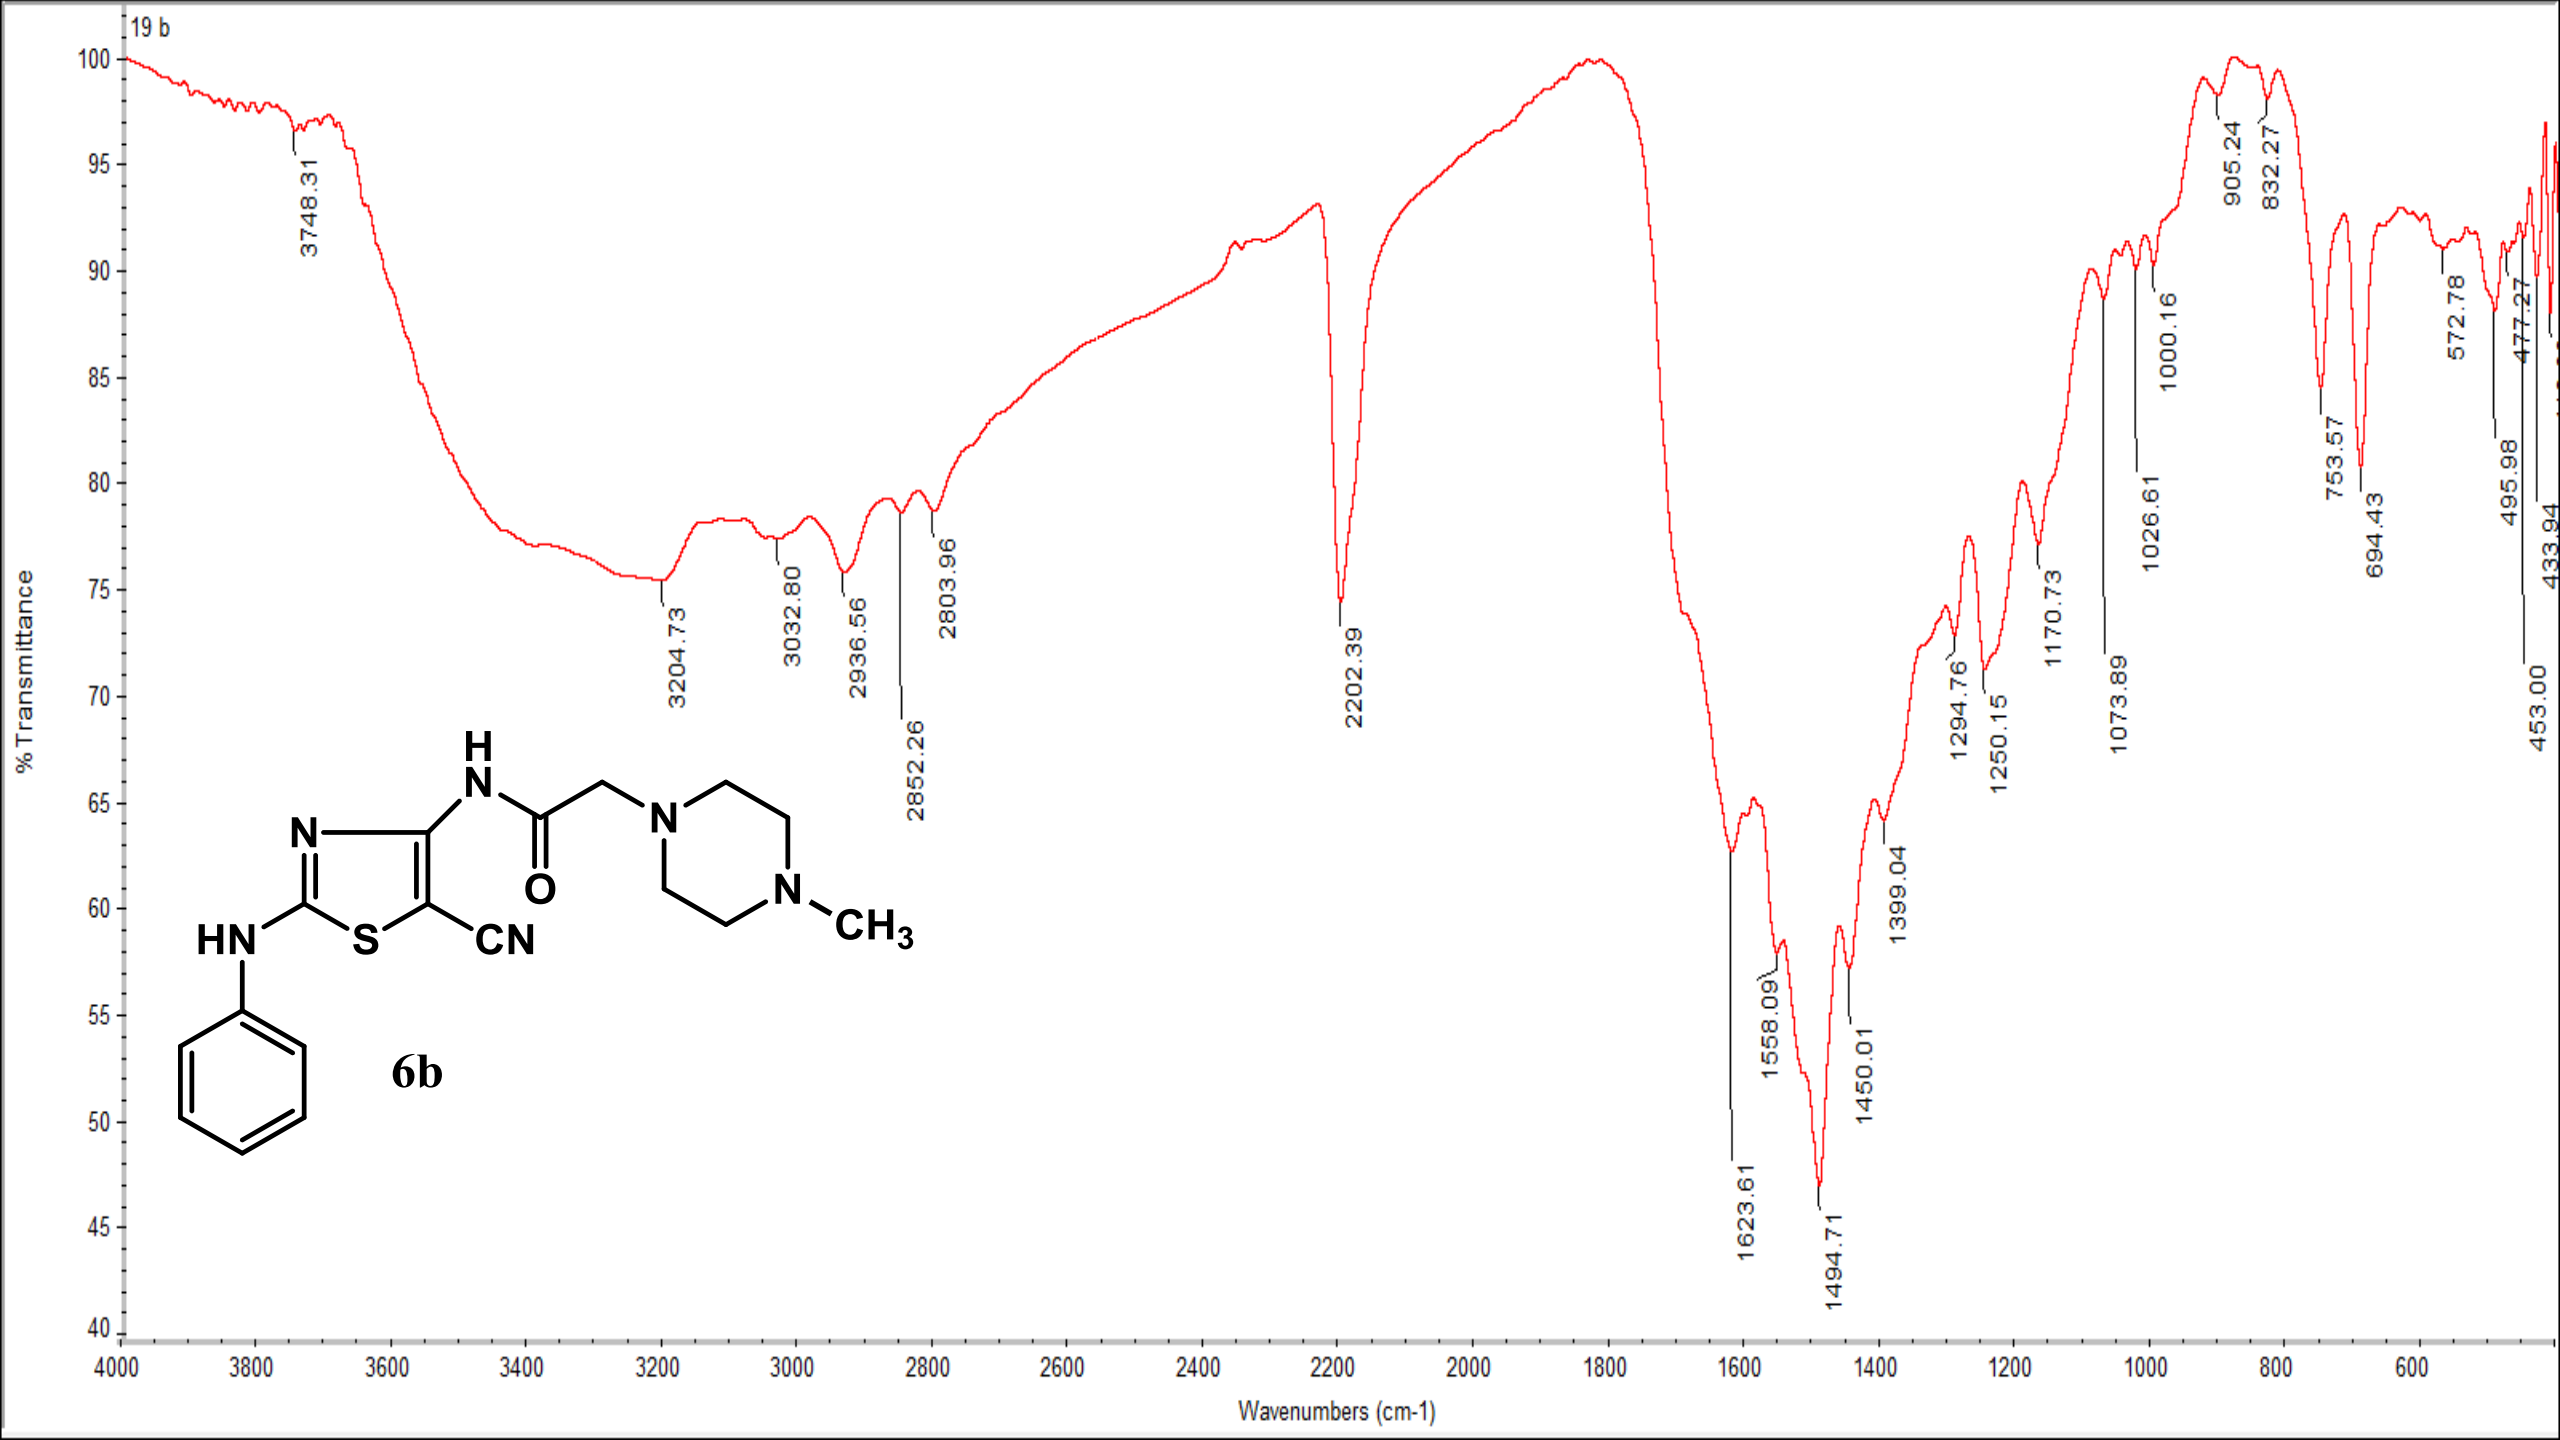

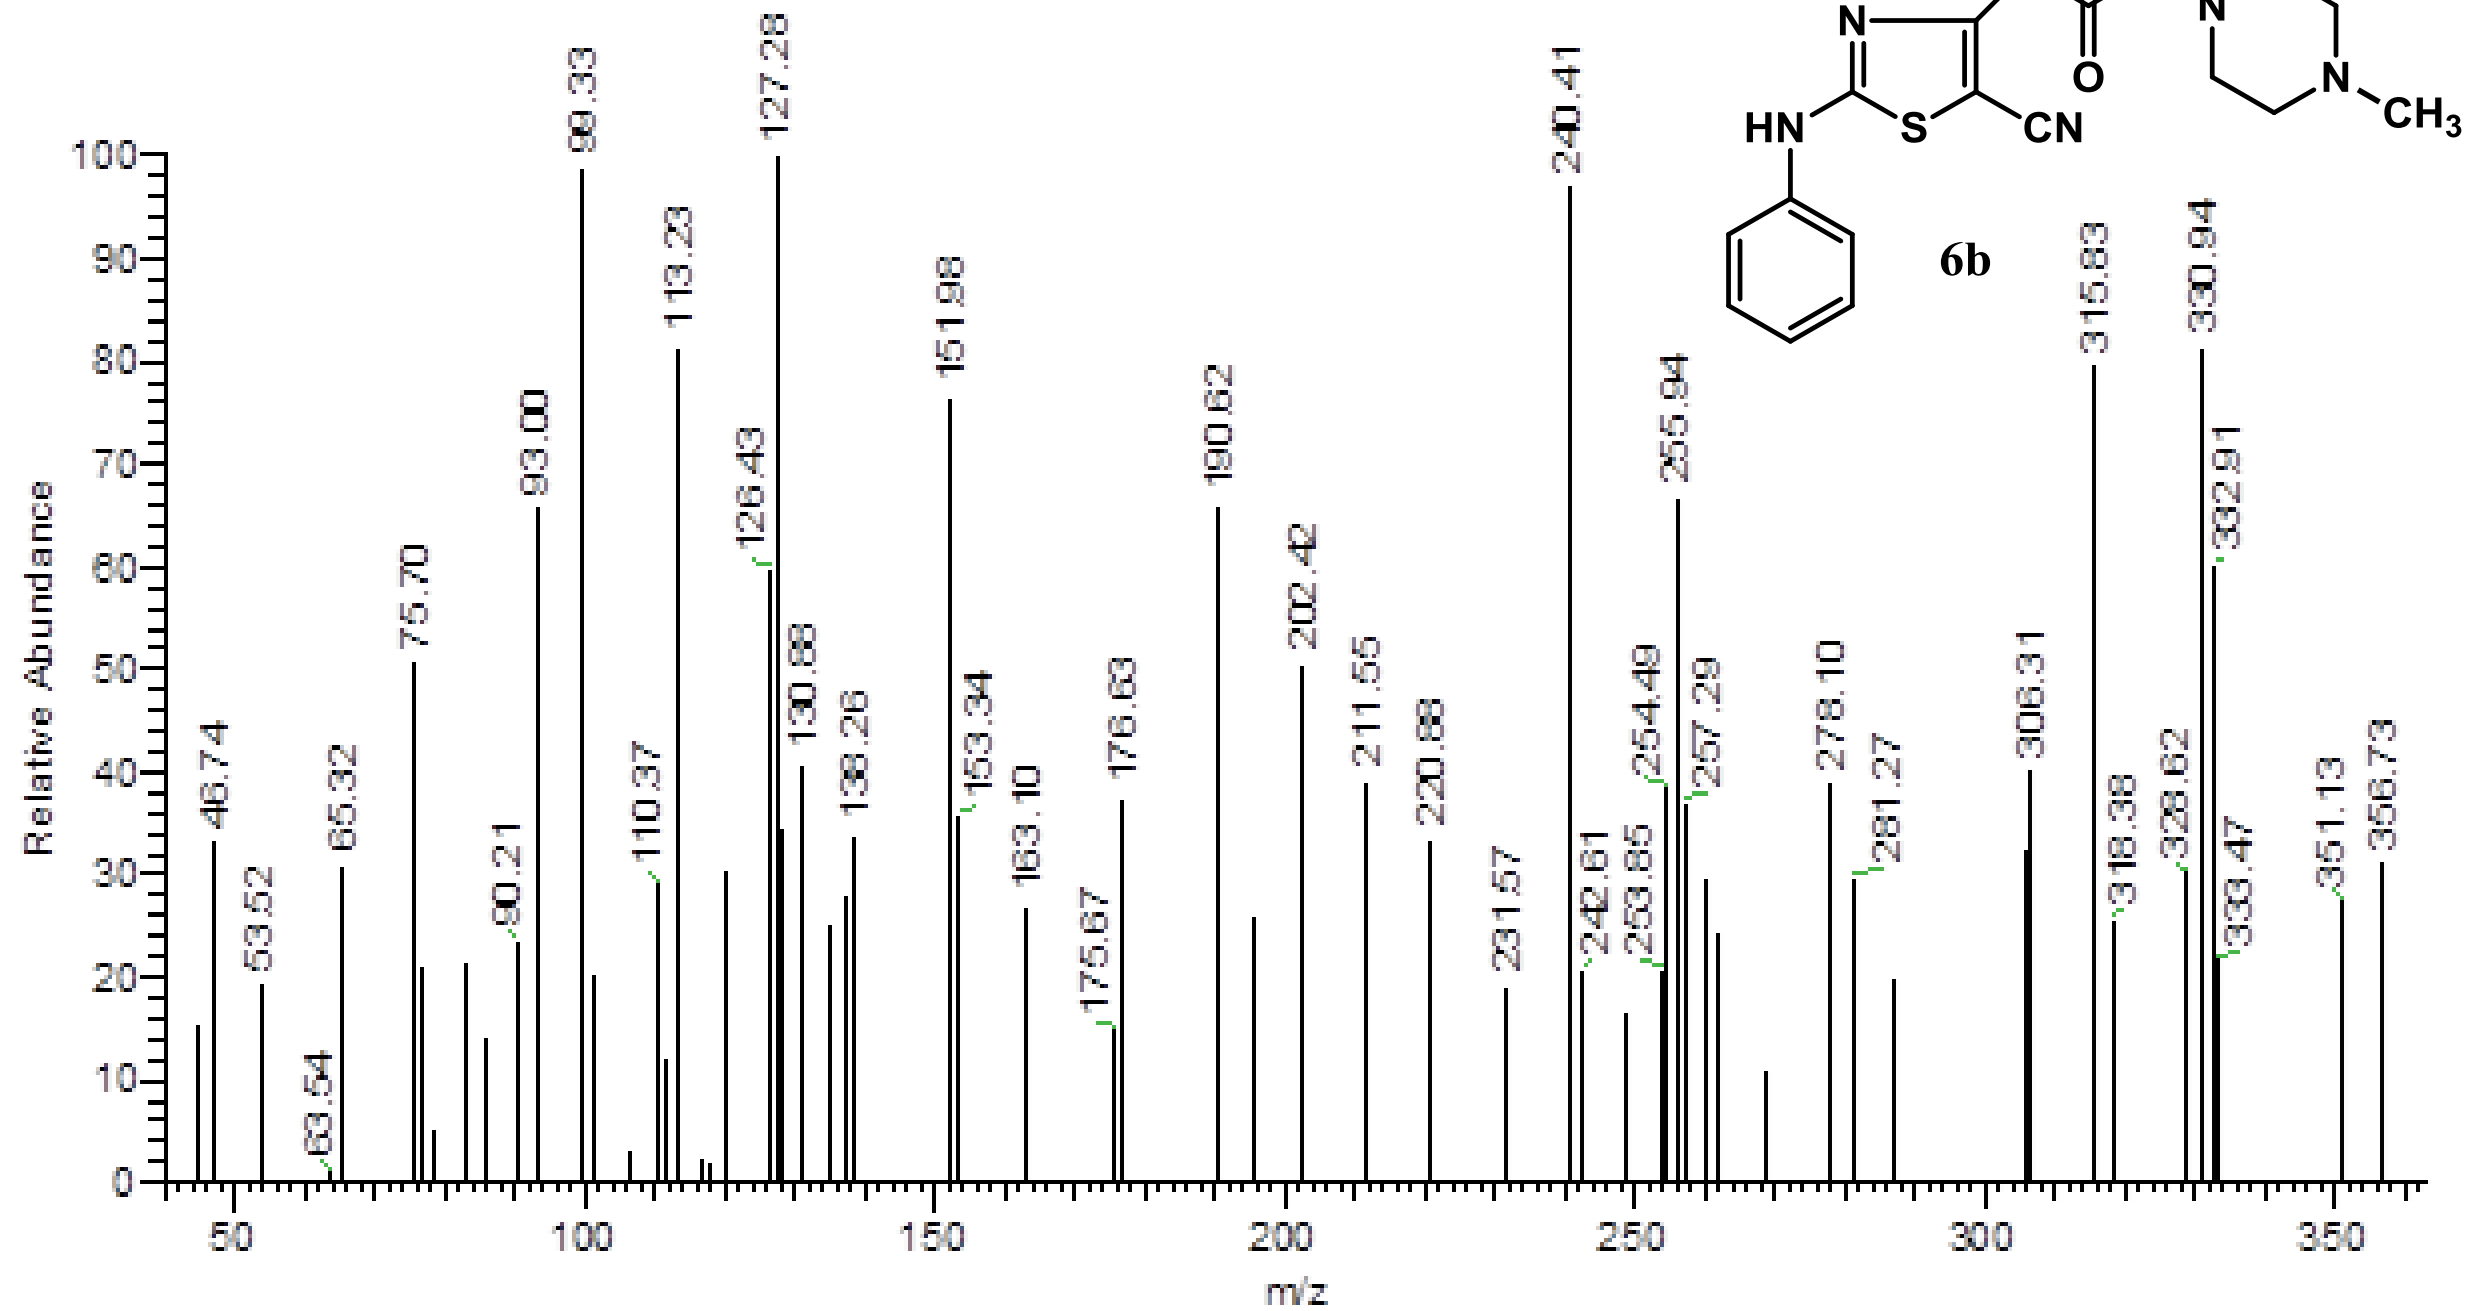



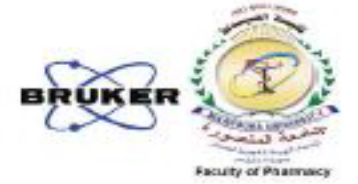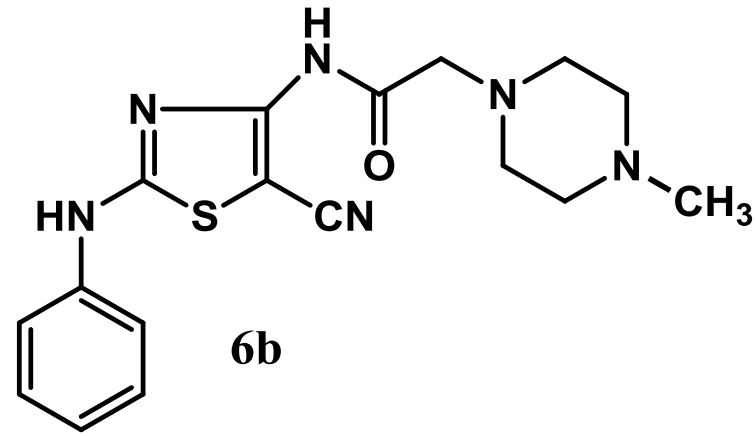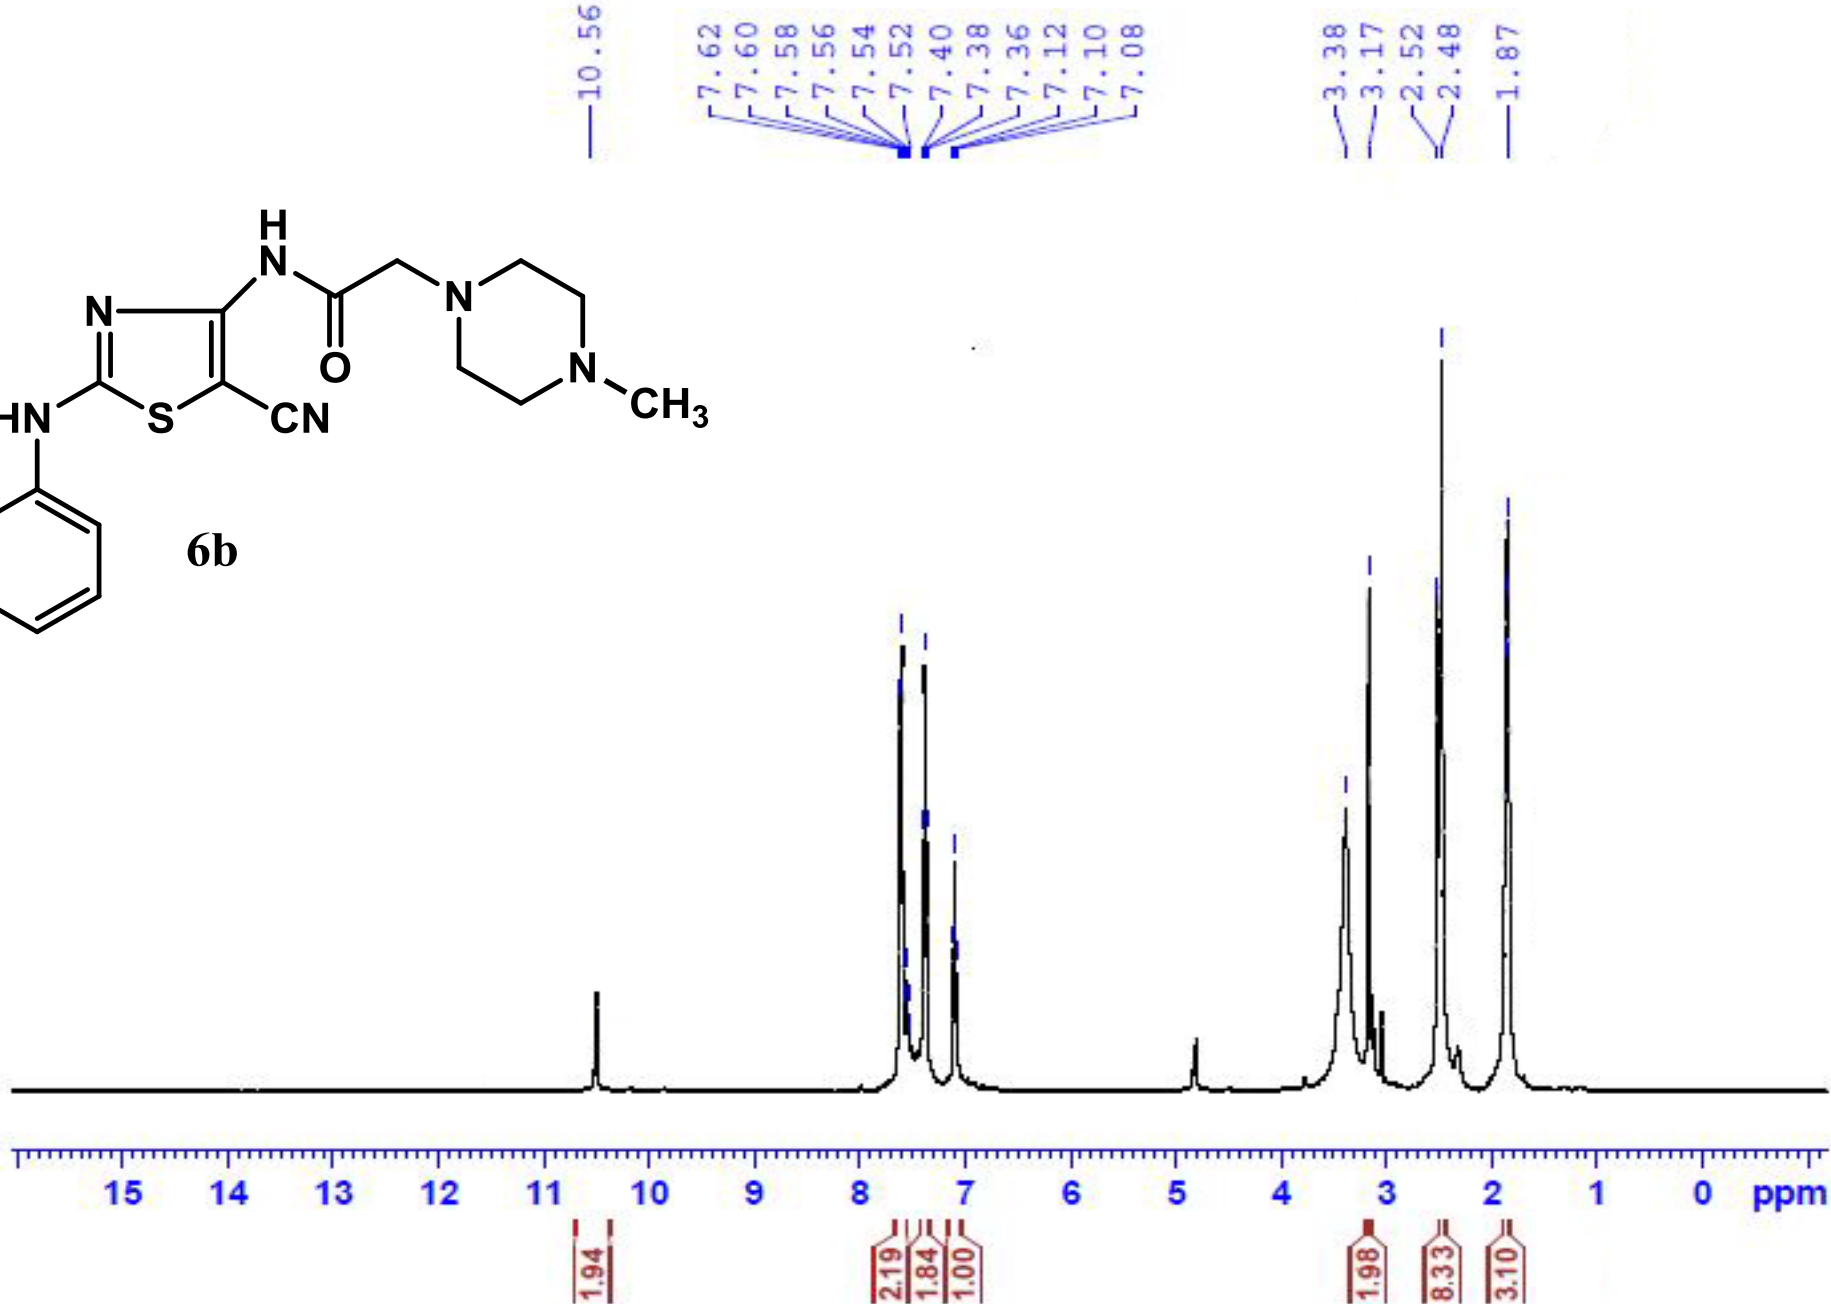

Current Data Parameters  
 NAME Alaa abdallah-2A-Hn  
 EXPNO 10  
 PROCNO 1

F2 - Acquisition Parameters  
 Date 20210211  
 Time 7.55 h  
 INSTRUM spect  
 PROBHD Z108618\_0945 ( )  
 PULPROG zg30  
 TD 65536  
 SOLVENT DMSO  
 NS 16  
 DS 2  
 SWH 8012.820 Hz  
 FIDRES 0.244532 Hz  
 AQ 4.0894465 sec  
 RG 99.3  
 DW 62.400 usec  
 DE 6.50 usec  
 TE 293.0 K  
 D1 1.00000000 sec  
 TDO 1  
 SPO1 400.2024712 MHz  
 NUC1 1H  
 P1 13.50 usec  
 PLW1 13.00000000 W

F2 - Processing parameters  
 SI 65536  
 SF 400.2000000 MHz  
 WDW EM  
 SSB 0  
 LB 0.30 Hz  
 GB 0  
 PC 1.00

alaa abdallah 6A -M c13

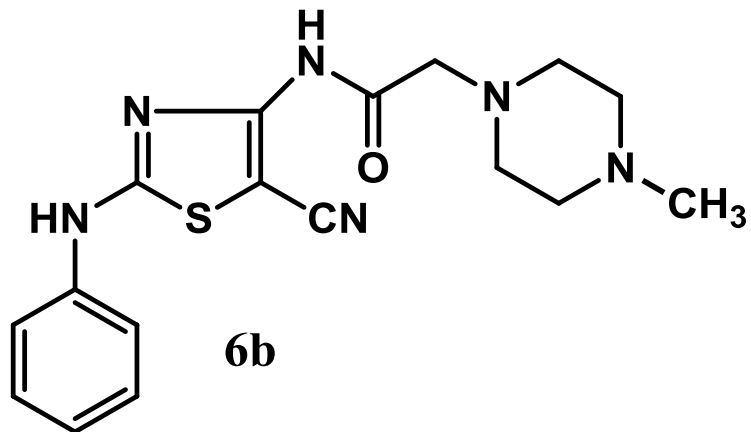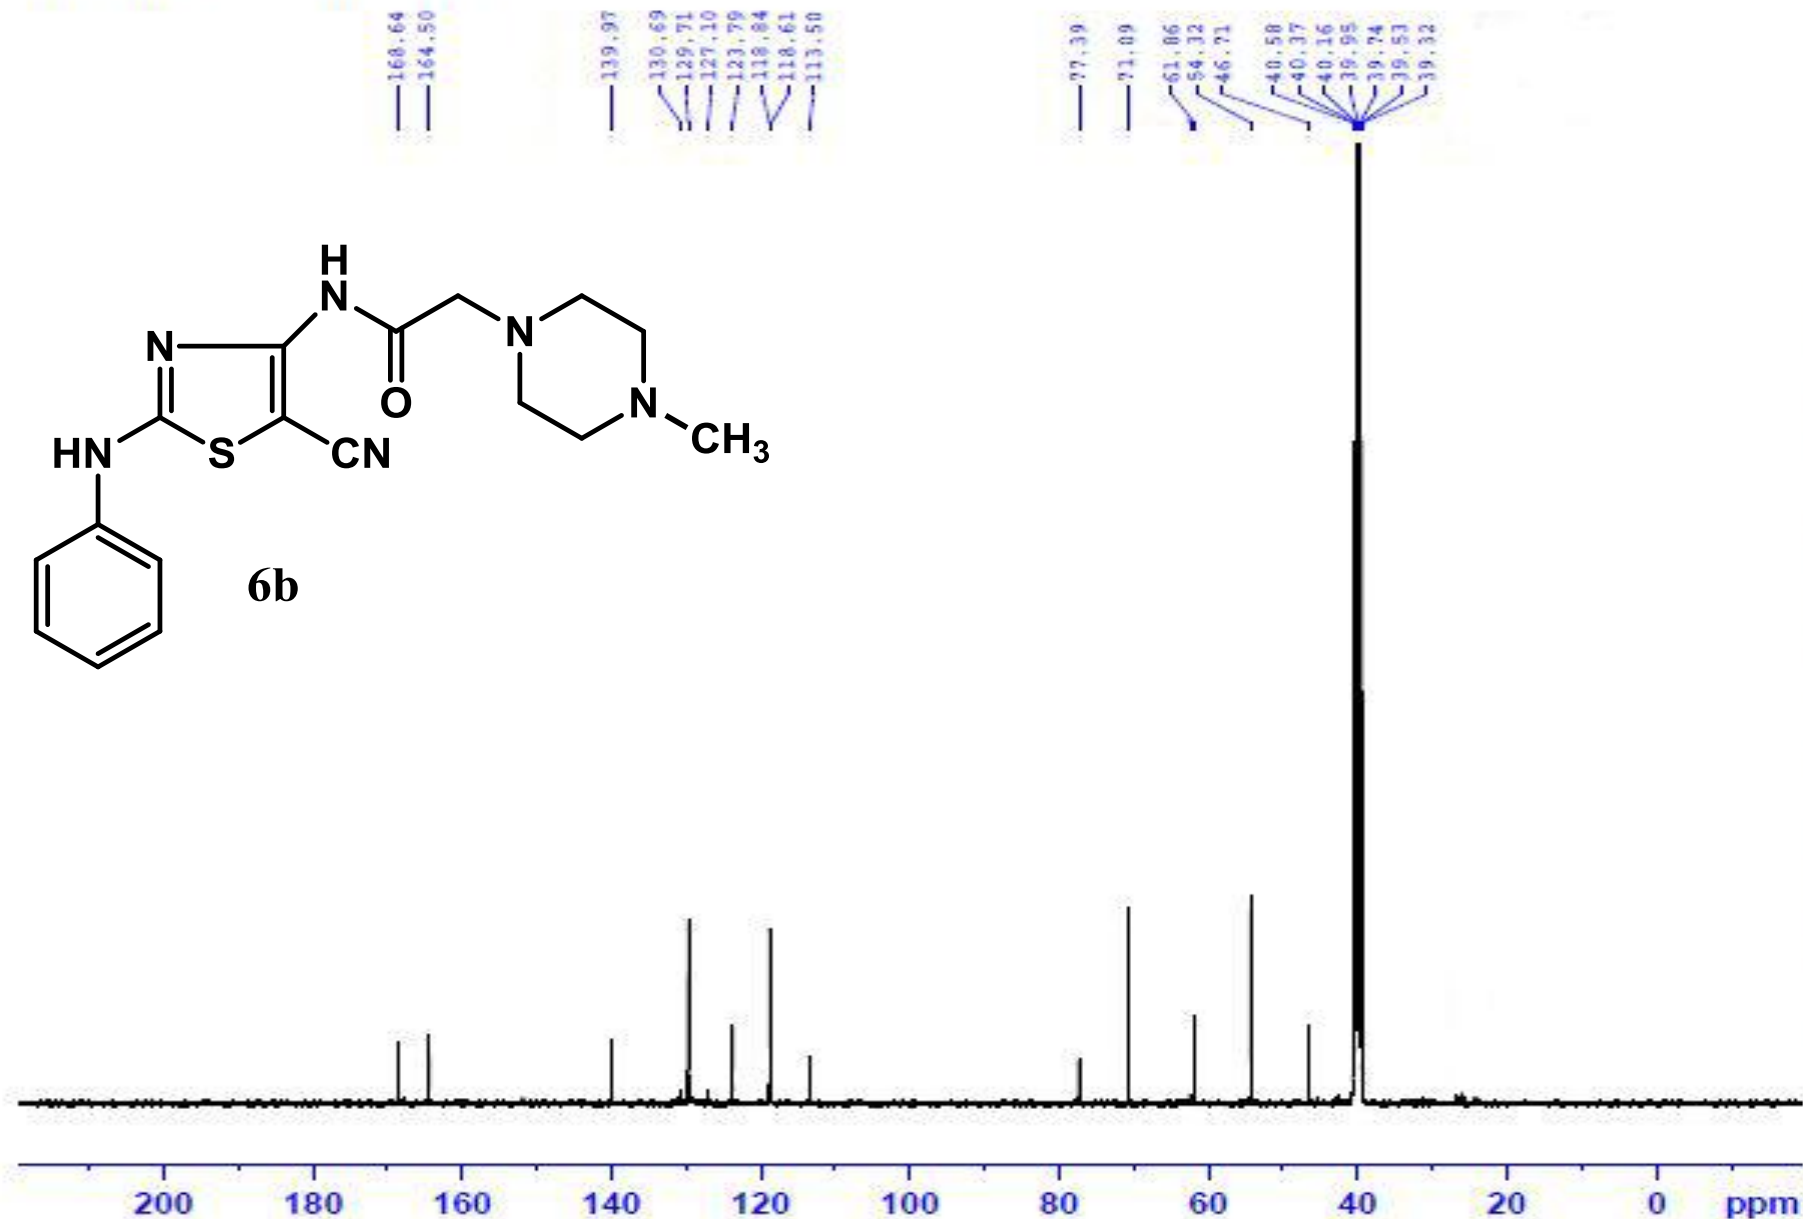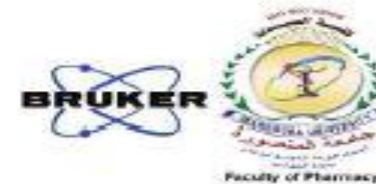

Current Data Parameters  
NAME alaa abdallah 6A -M c13  
EXPNO 10  
PROCNO 1

F2 - Acquisition Parameters  
Date\_ 20210302  
Time 3.27 h  
INSTRUM spect  
PROBHD Z108618\_0945 (   
PULPROG zgpg30  
TD 65536  
SOLVENT DMSO  
NS 2100  
DS 4  
SWH 24038.461 Hz  
FIDRES 0.733596 Hz  
AQ 1.3631488 sec  
RG 197.77  
DW 20.800 usec  
DE 6.50 usec  
TE 293.8 K  
D1 2.00000000 sec  
D11 0.03000000 sec  
TD0 1  
SFO1 100.6404331 MHz  
NUC1 13C  
P1 10.00 usec  
PLW1 47.00000000 W  
SFO2 400.2016008 MHz  
NUC2 1H  
CVDPRG[2] waltz16  
PCPD2 90.00 usec  
PLW2 13.00000000 W  
PLW12 0.29249999 W  
PLW13 0.14713000 W

F2 - Processing parameters  
SI 32768  
SF 100.6303700 MHz  
WDW EM  
SSB 0  
LB 1.00 Hz  
GB 0  
PC 1.40

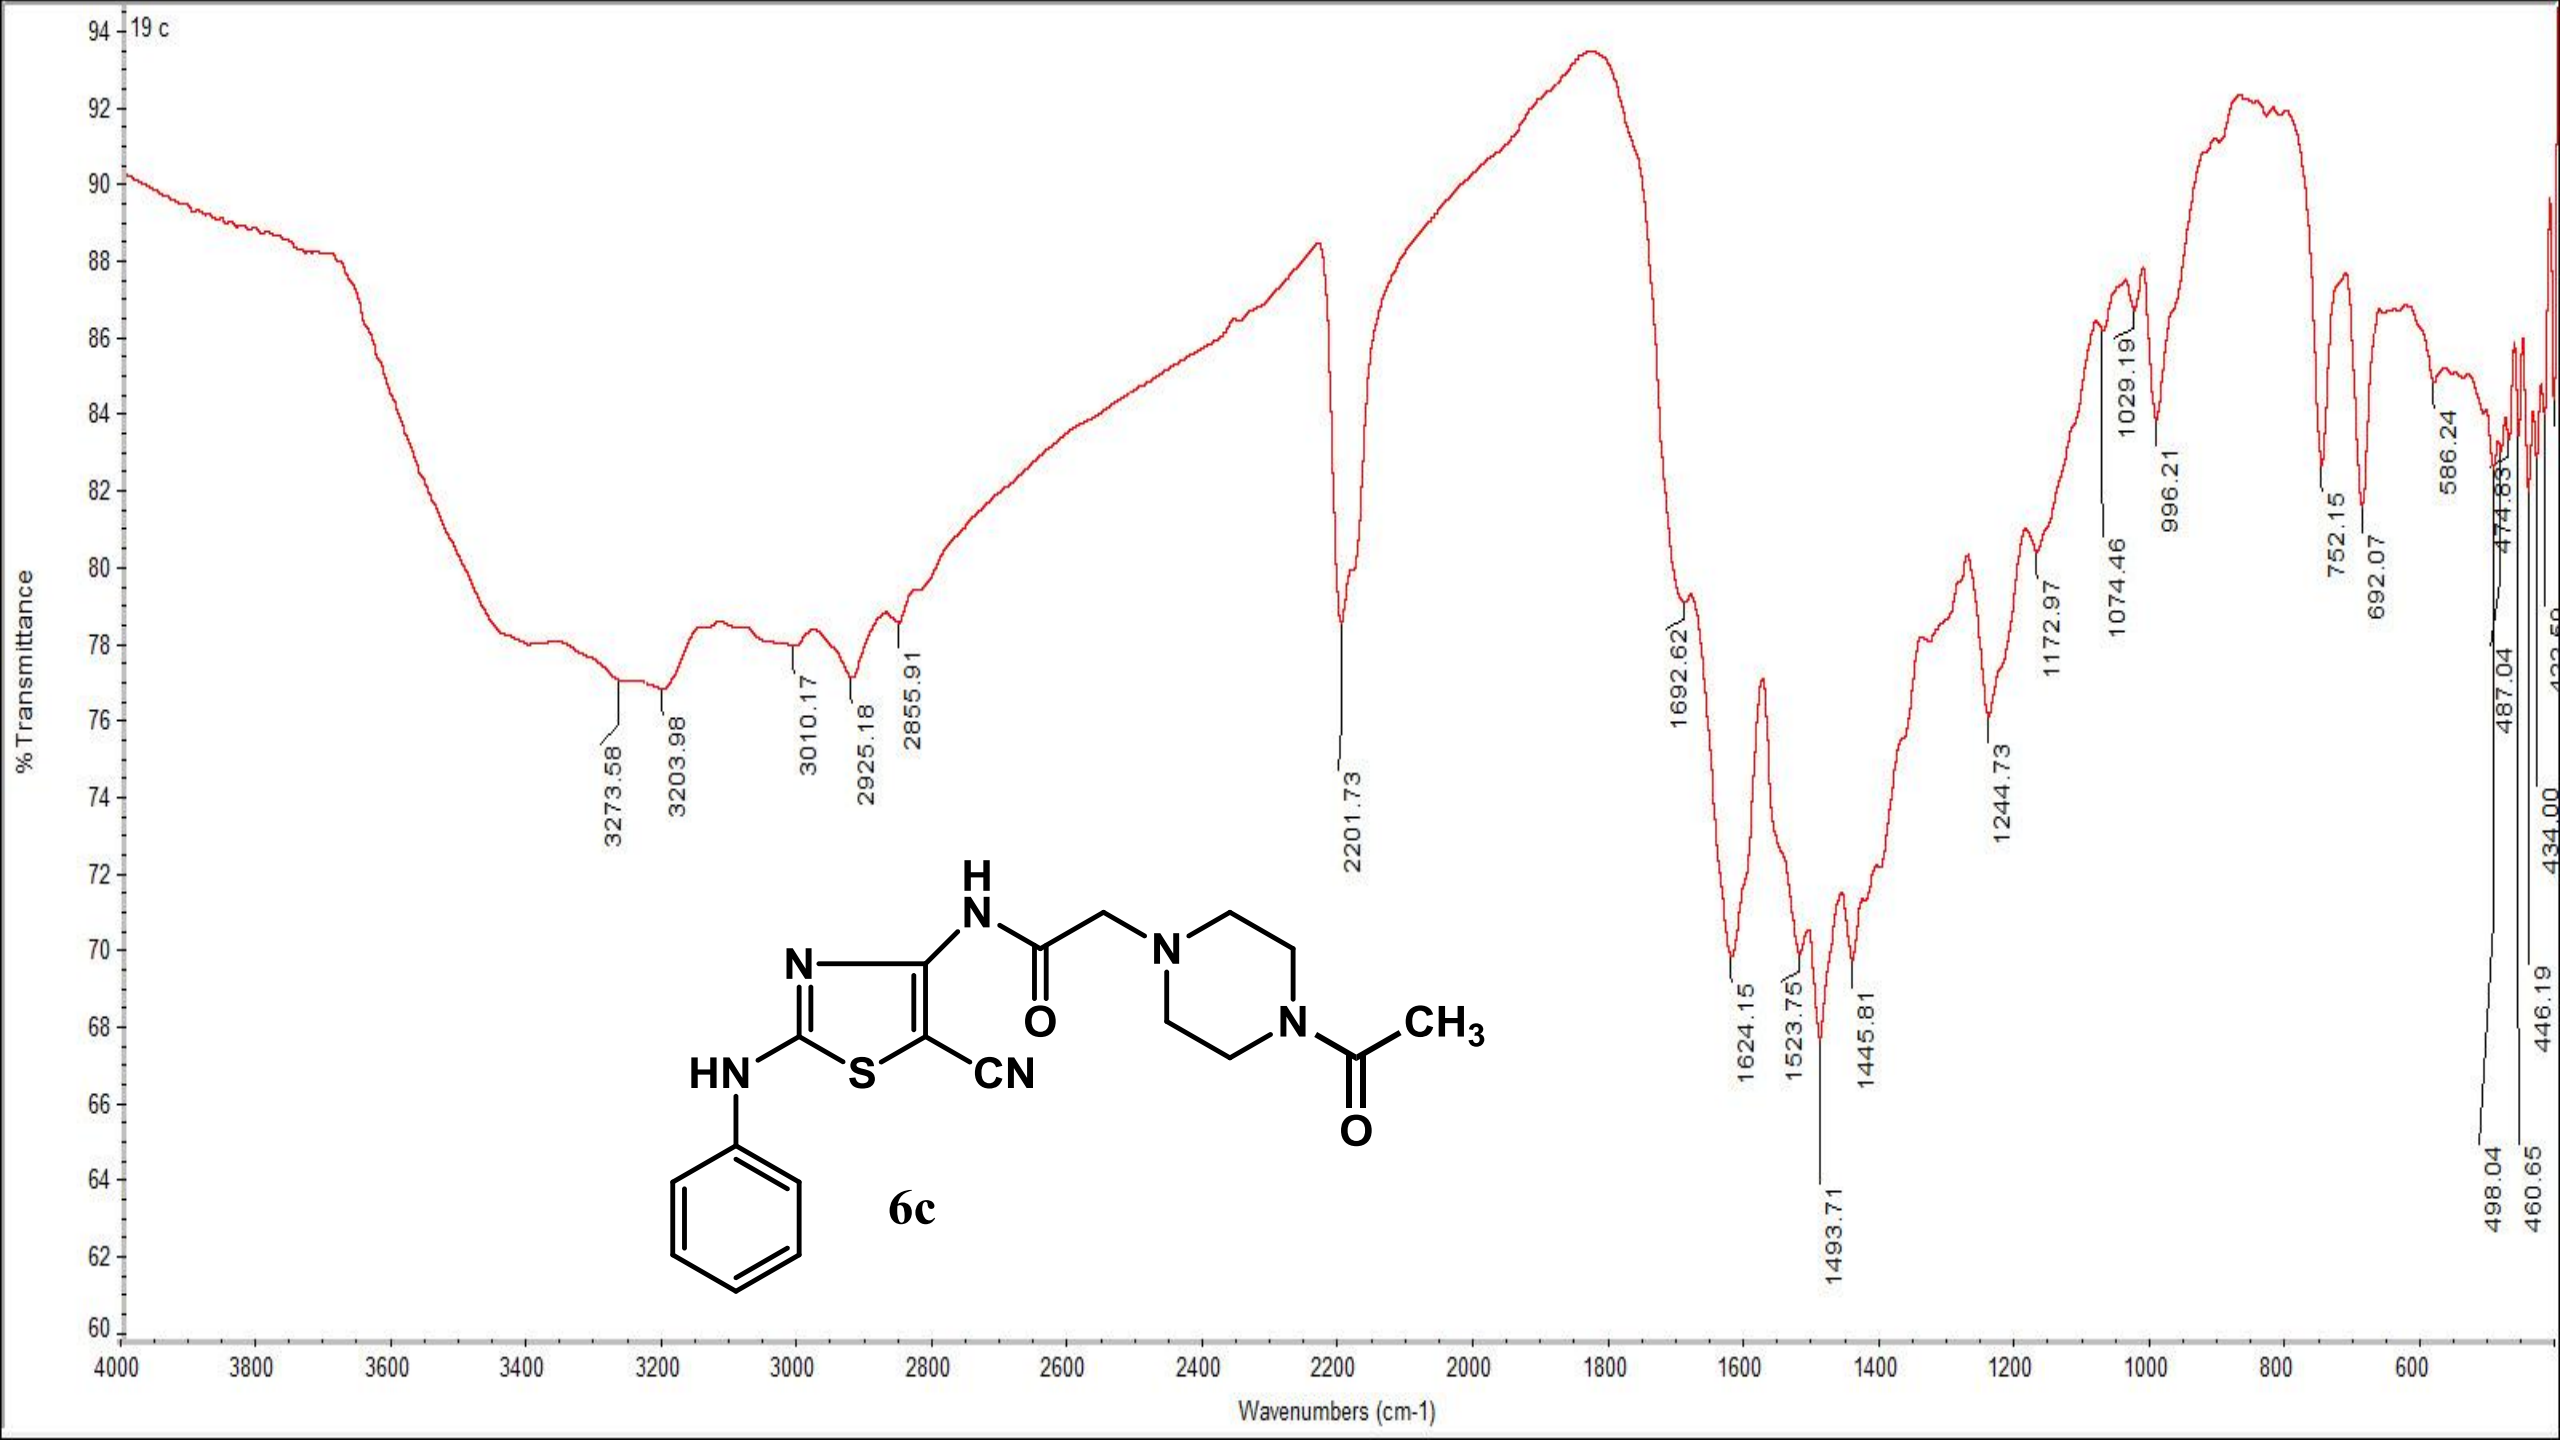

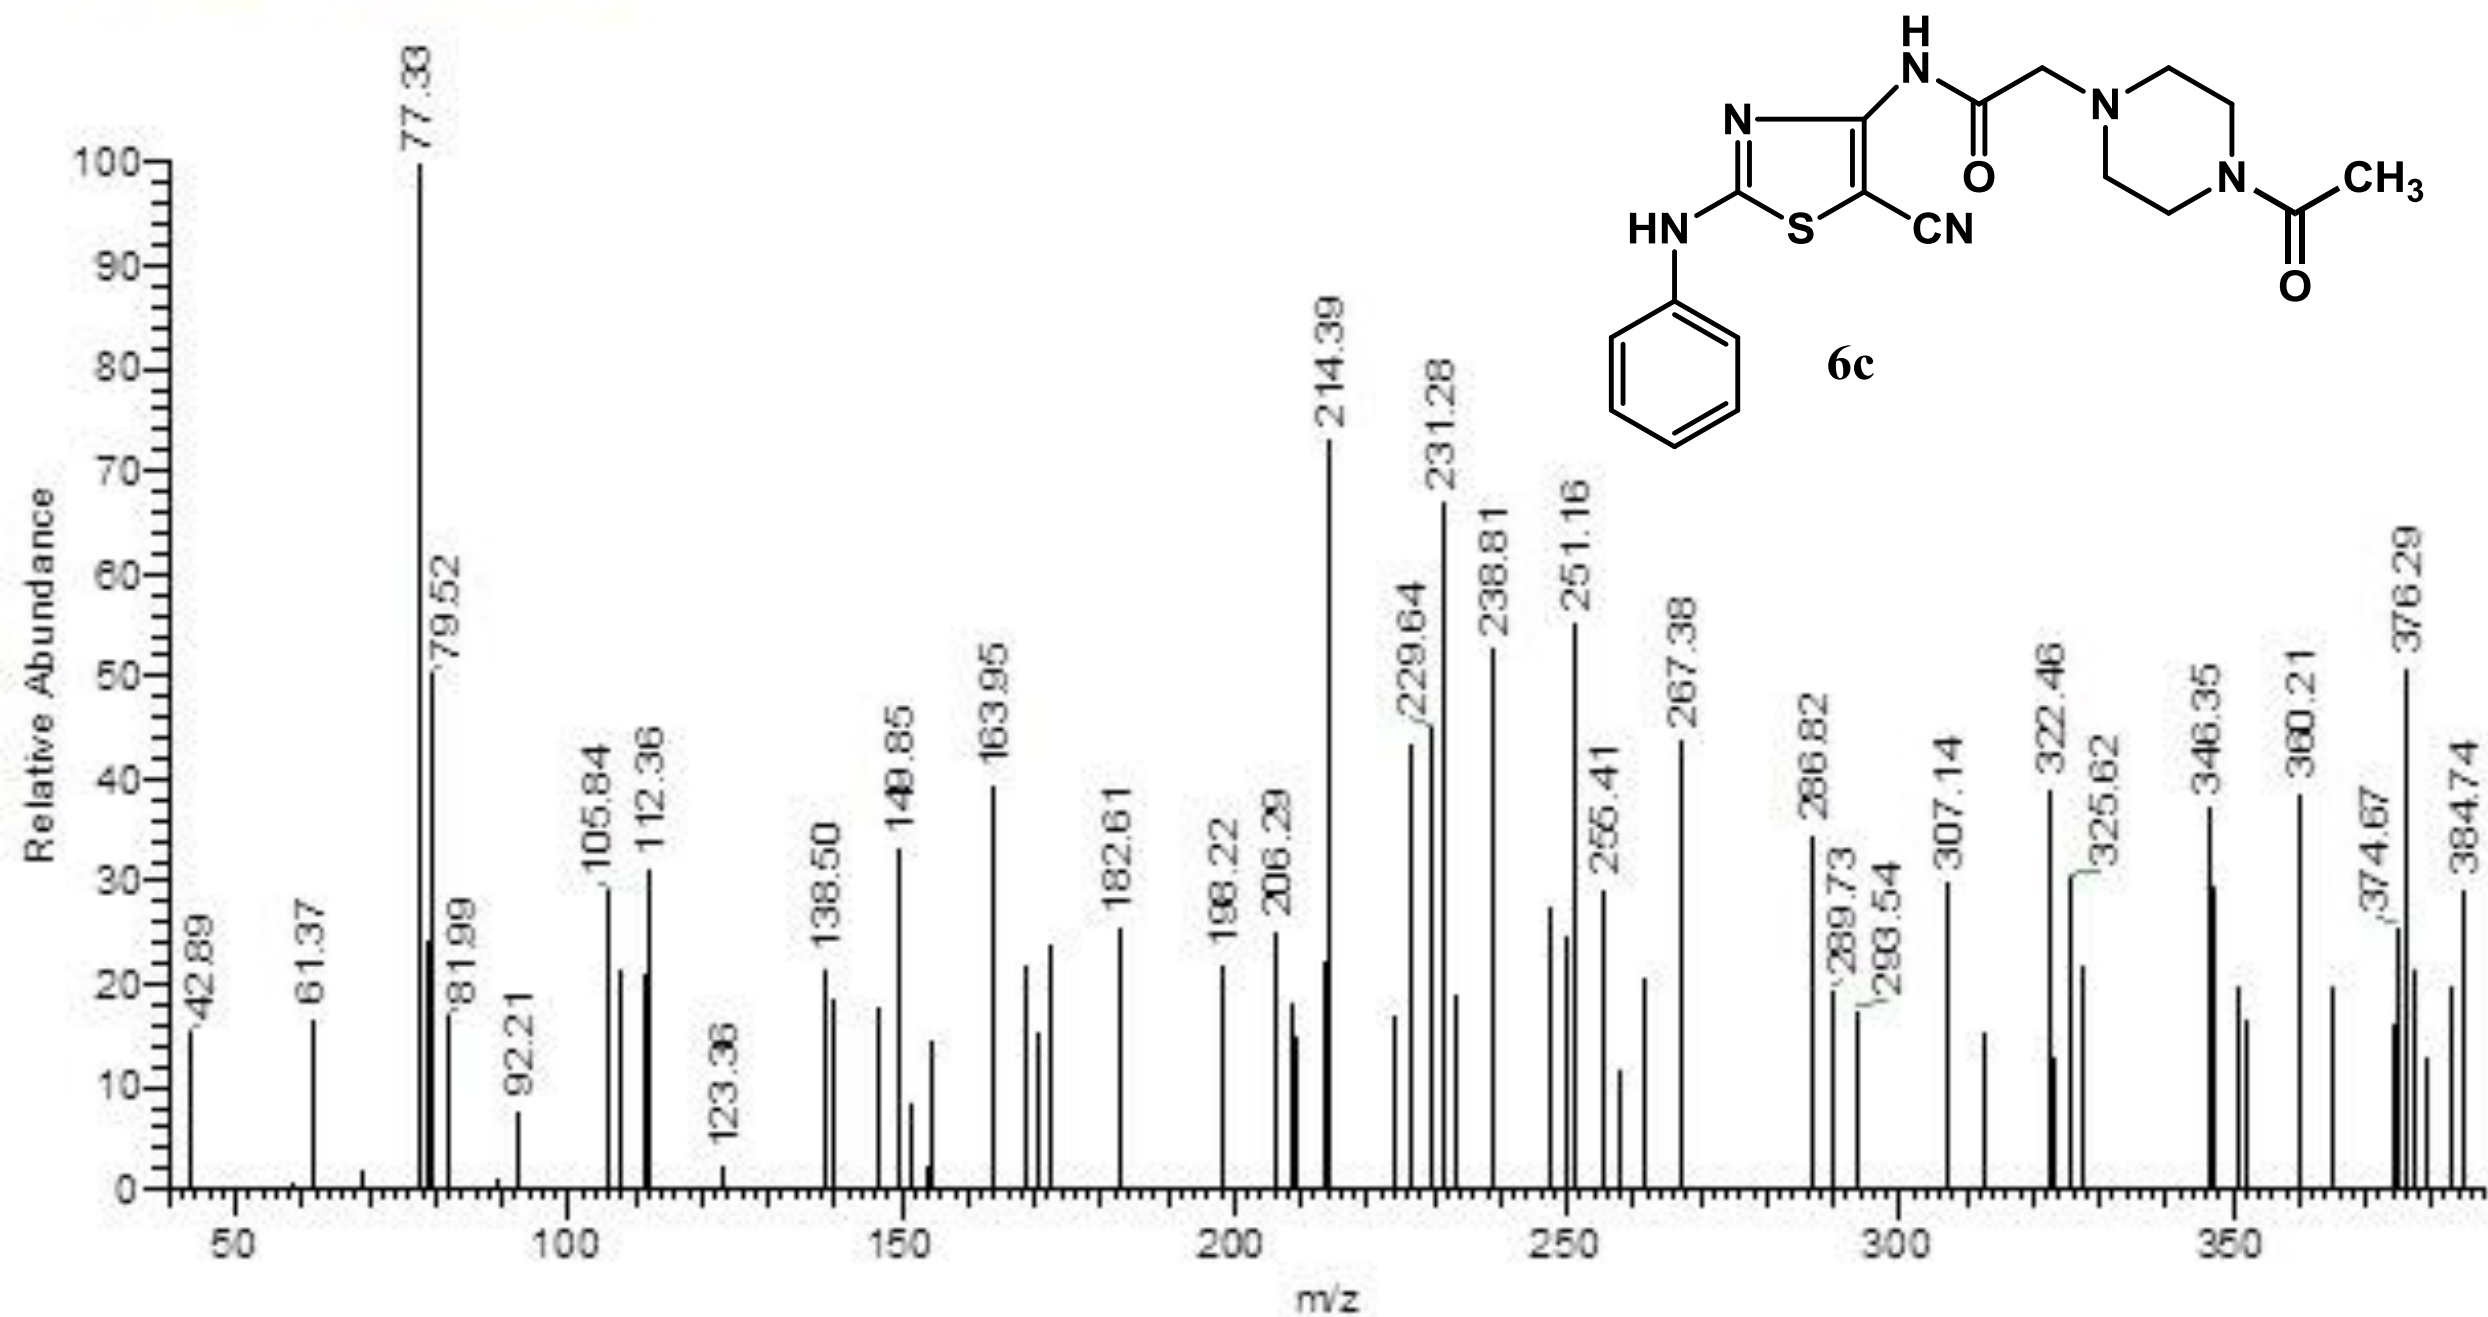

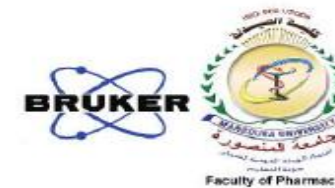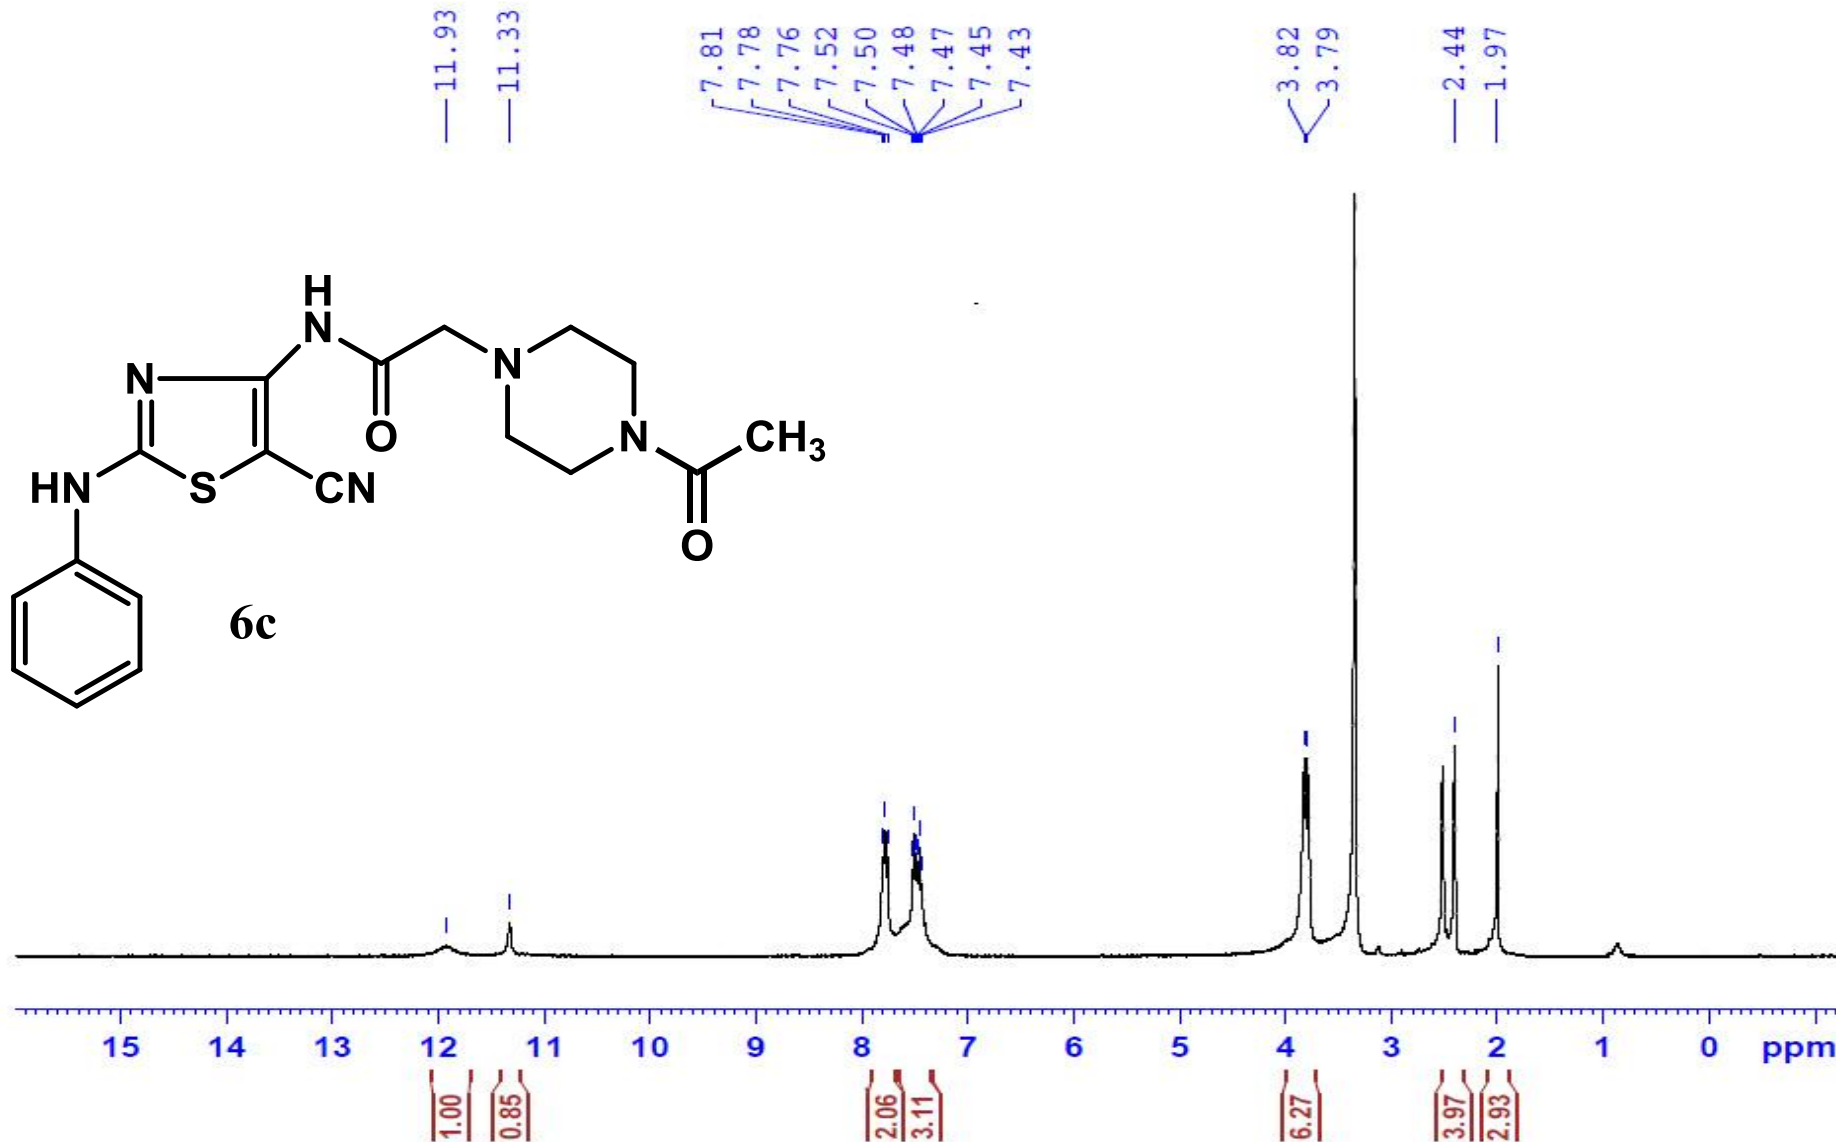

Current Data Parameters  
 NAME Alaa abdallah-poc  
 EXPNO 10  
 PROCNO 1

F2 - Acquisition Parameters  
 Date\_ 20210427  
 Time 12.06 h  
 INSTRUM spect  
 PROBHD Z108618\_0945 (   
 PULPROG zg30  
 TD 65536  
 SOLVENT DMSO  
 NS 16  
 DS 2  
 SWH 8012.820 Hz  
 FIDRES 0.244532 Hz  
 AQ 4.0894465 se  
 RG 176.72  
 DW 62.400 us  
 DE 6.50 us  
 TE 298.0 K  
 D1 1.00000000 se  
 TD0 1  
 SFO1 400.2024712 MH  
 NUC1 1H  
 P1 13.50 us  
 PLW1 13.00000000 W

F2 - Processing parameters  
 SI 65536  
 SF 400.2000000 MH  
 WDW EM  
 SSB 0  
 LB 0.30 Hz  
 GB 0  
 PC 1.00



Alaa abdallah-3-M c13

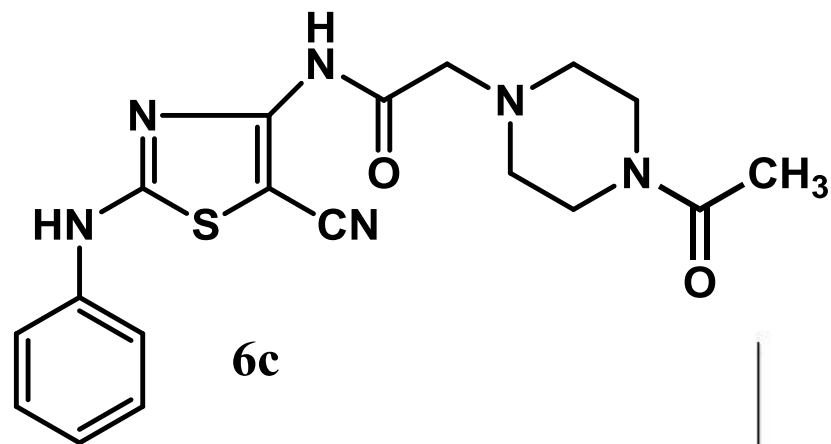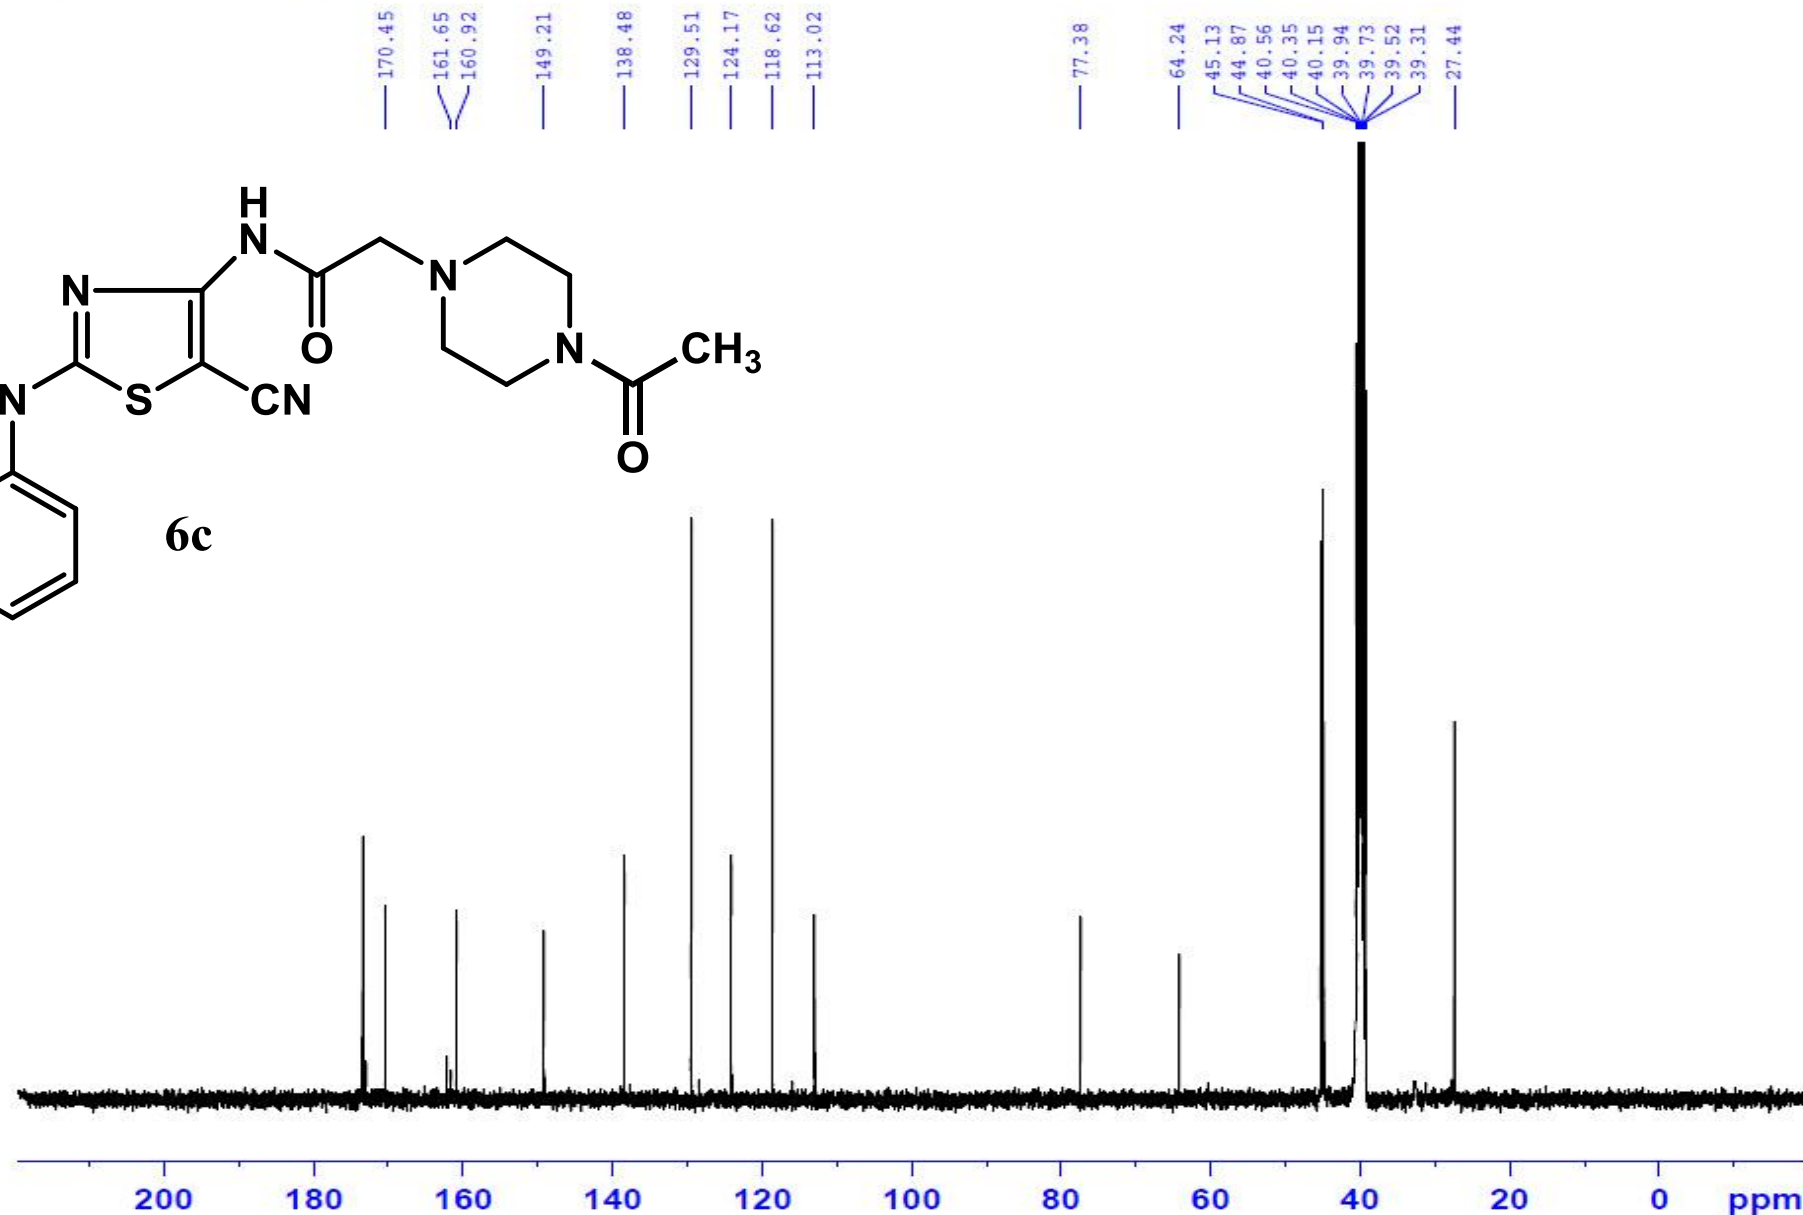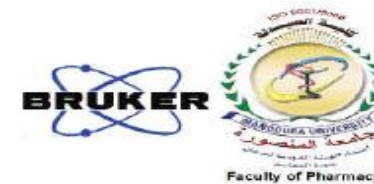

Current Data Parameters  
NAME alaa abdallah cibcl -M c13  
EXPNO 10  
PROCNO 1

F2 - Acquisition Parameters  
Date\_ 20210302  
Time\_ 9.37 h  
INSTRUM spect  
PROBHD Z108618\_0945 (  
PULPROG zgpg30  
TD 65536  
SOLVENT DMSO  
NS 2100  
DS 4  
SWH 24038.461 Hz  
FIDRES 0.733596 Hz  
AQ 1.3631488 sec  
RG 197.77  
DW 20.800 usec  
DE 6.50 usec  
TE 0 K  
D1 2.00000000 sec  
D11 0.03000000 sec  
TD0 1  
SFO1 100.6404331 MHz  
NUC1 13C  
P1 10.00 usec  
PLW1 47.00000000 W  
SFO2 400.2016008 MHz  
NUC2 1H  
CPDPRG[2] waltz16  
PCPD2 90.00 usec  
PLW2 13.00000000 W  
PLW12 0.29249999 W  
PLW13 0.14713000 W

F2 - Processing parameters  
SI 32768  
SF 100.6303700 MHz  
WDW EM  
SSB 0  
LB 1.00 Hz  
GB 0  
PC 1.40

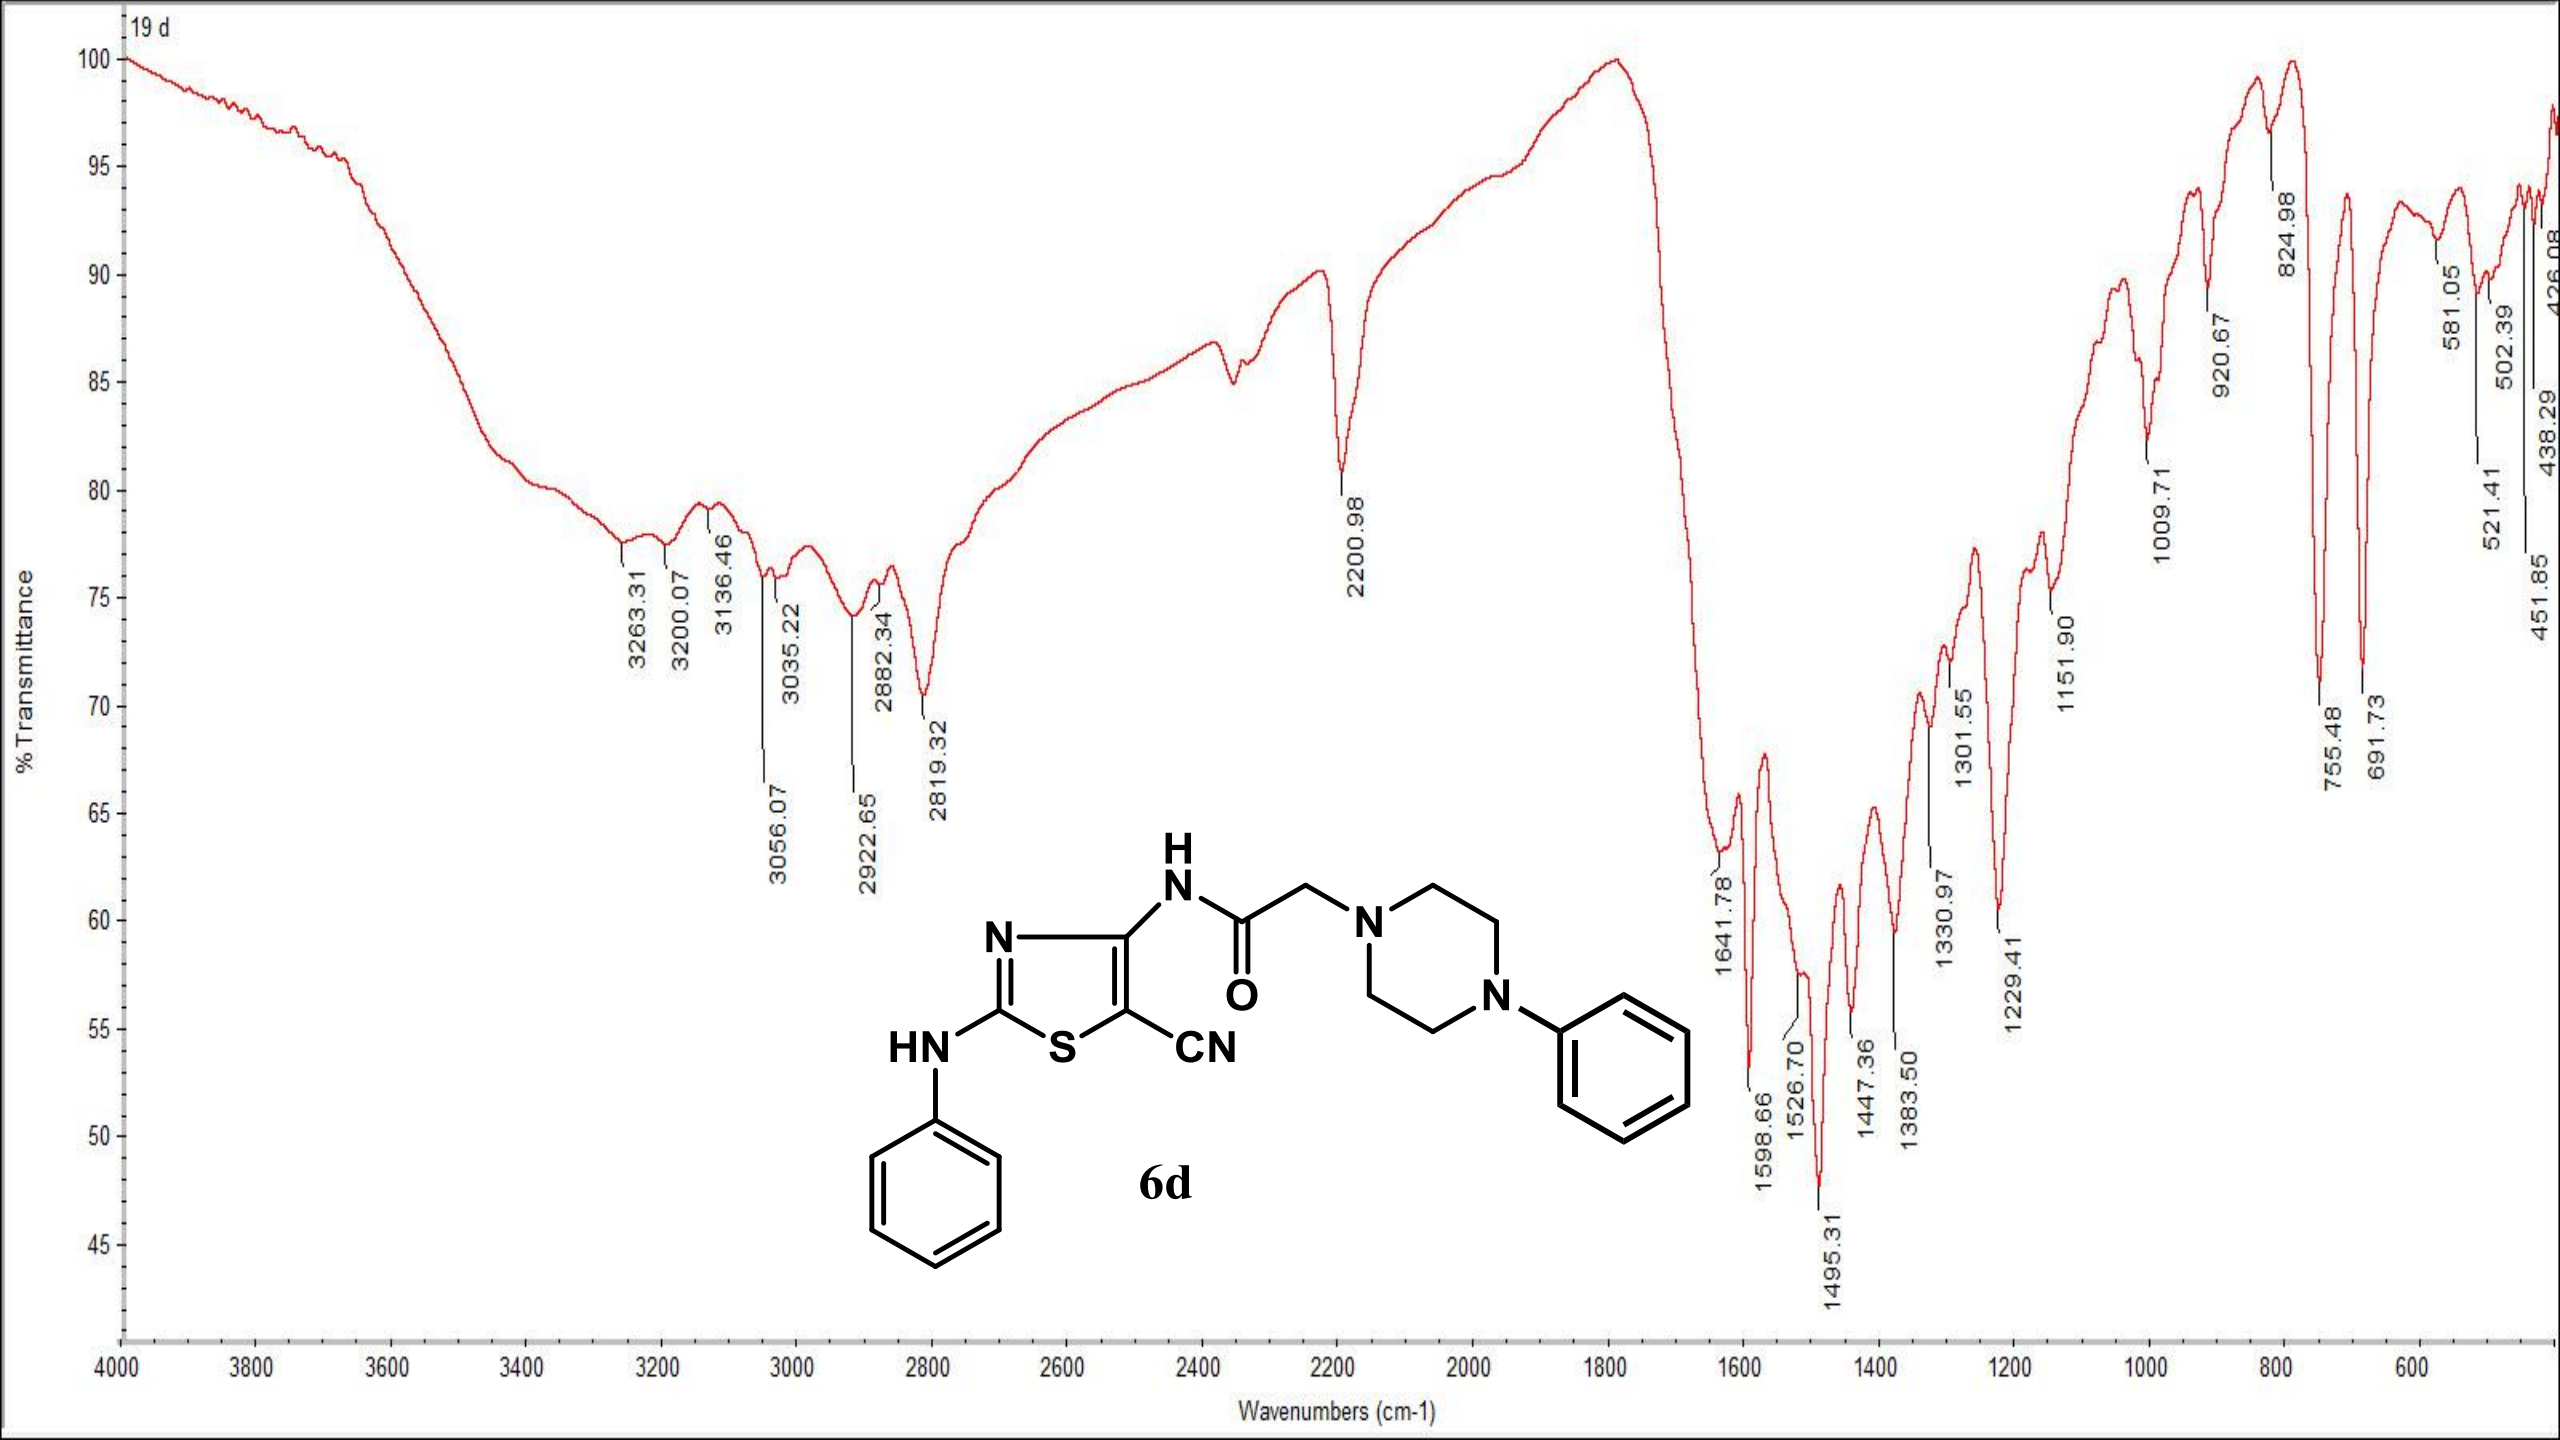

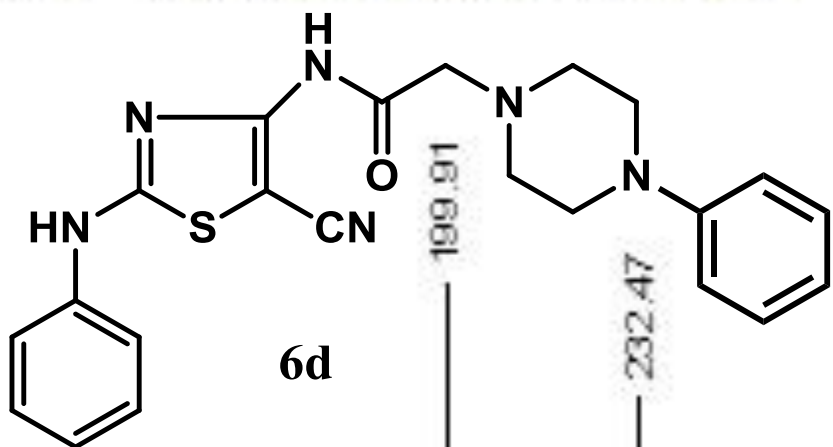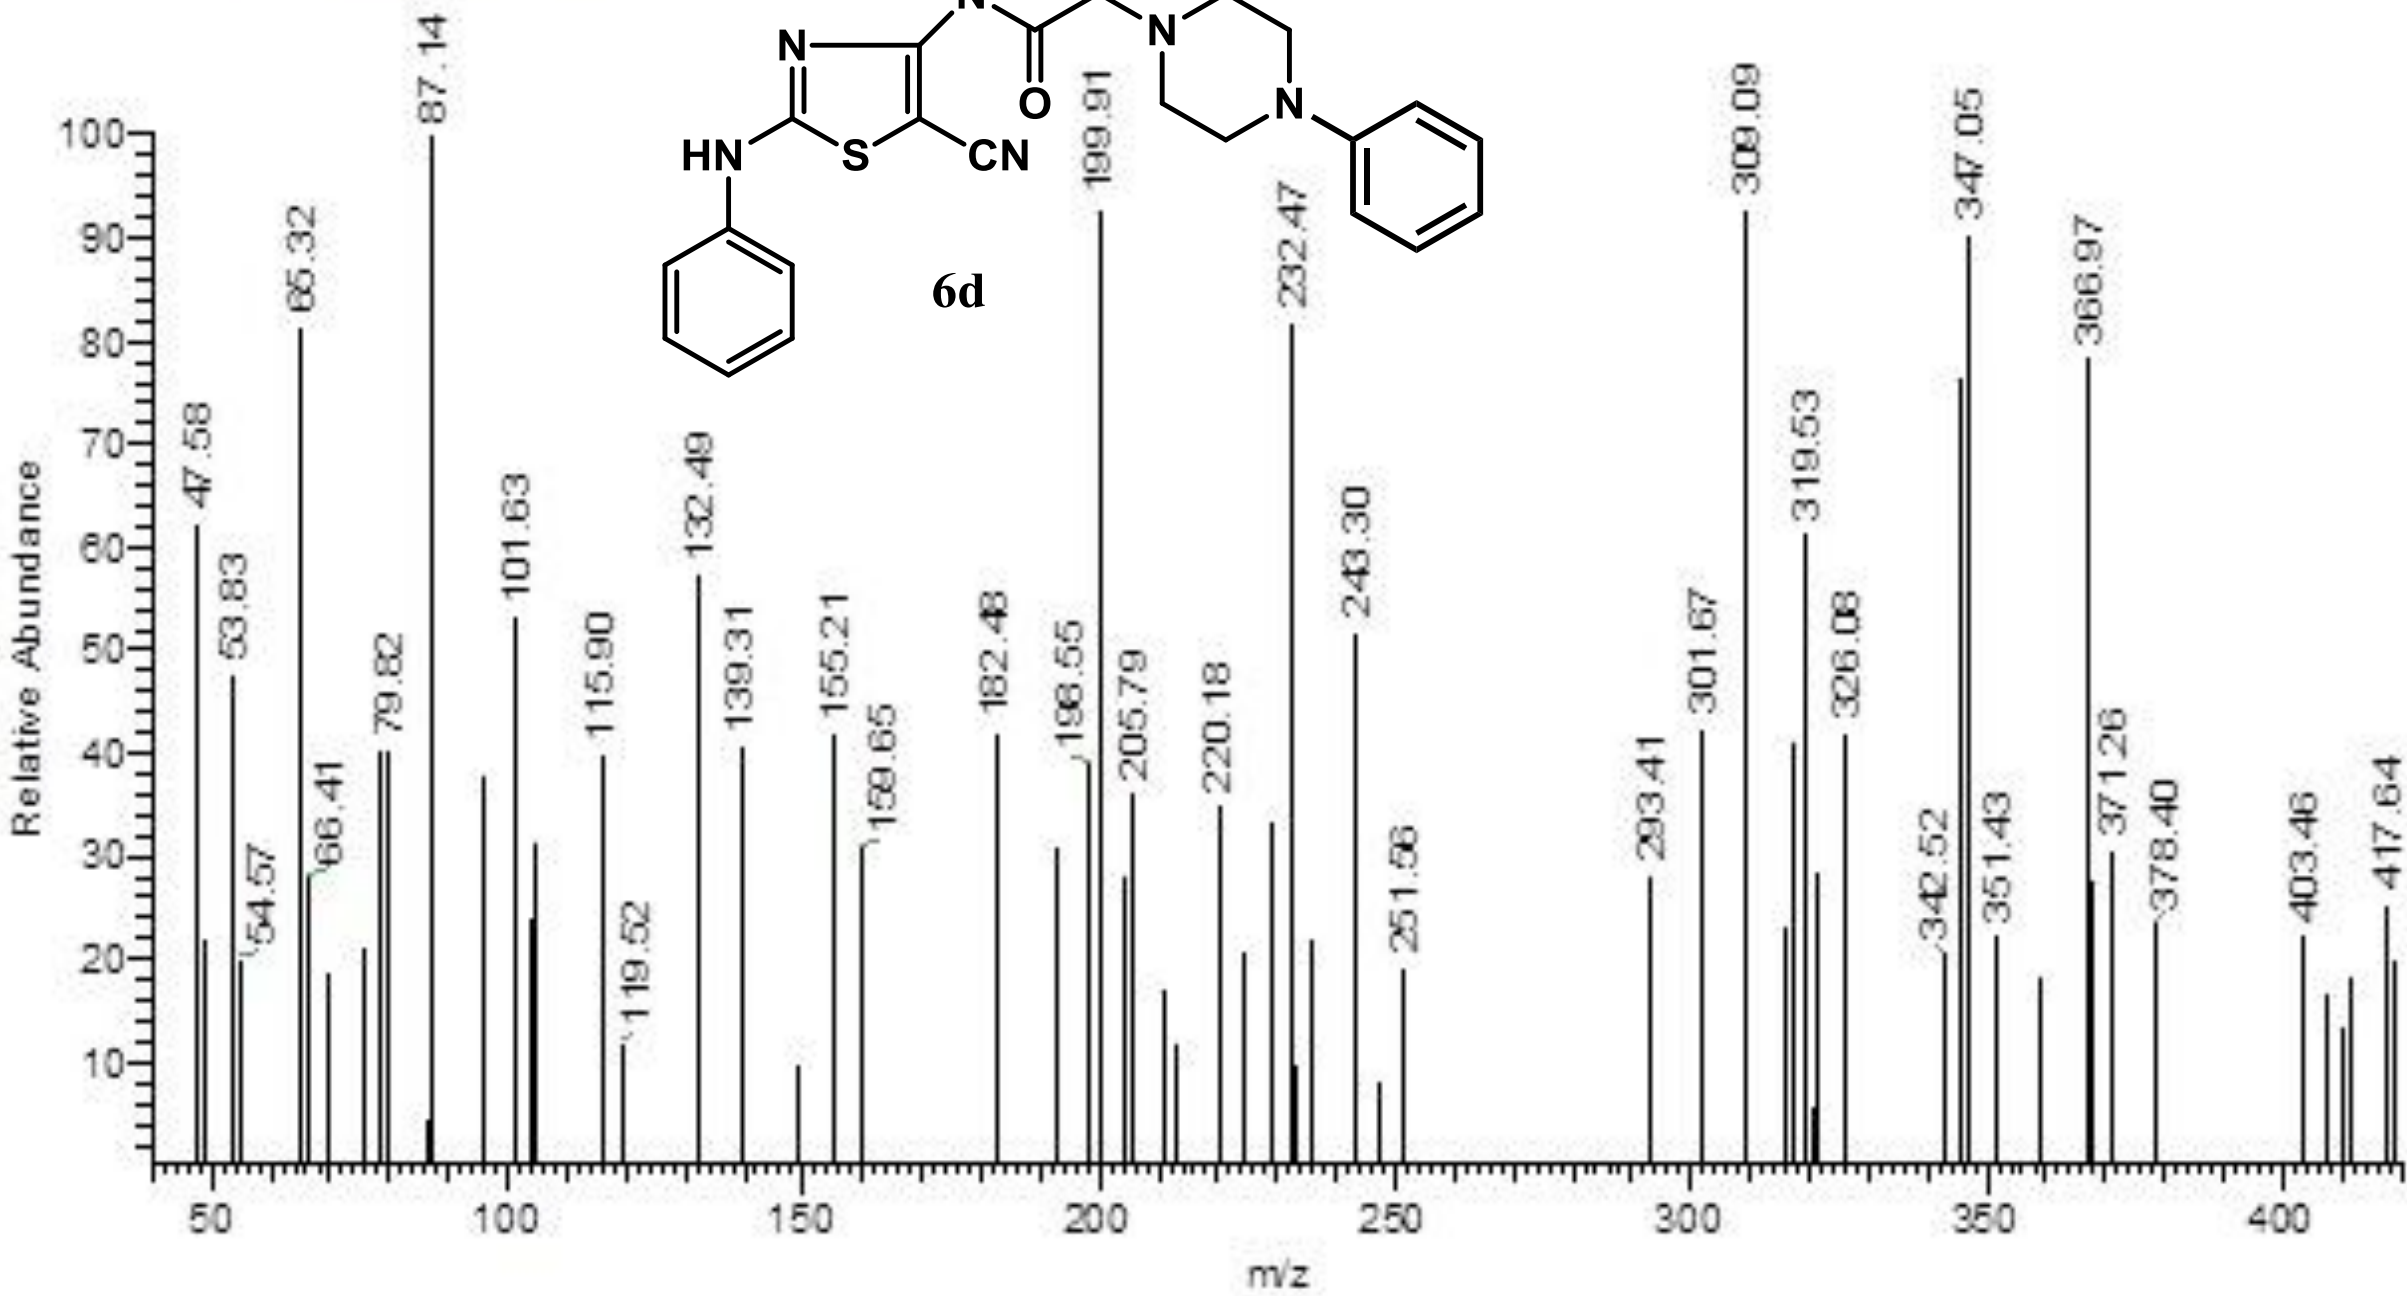



alaa abdallah 4A -M hnmr

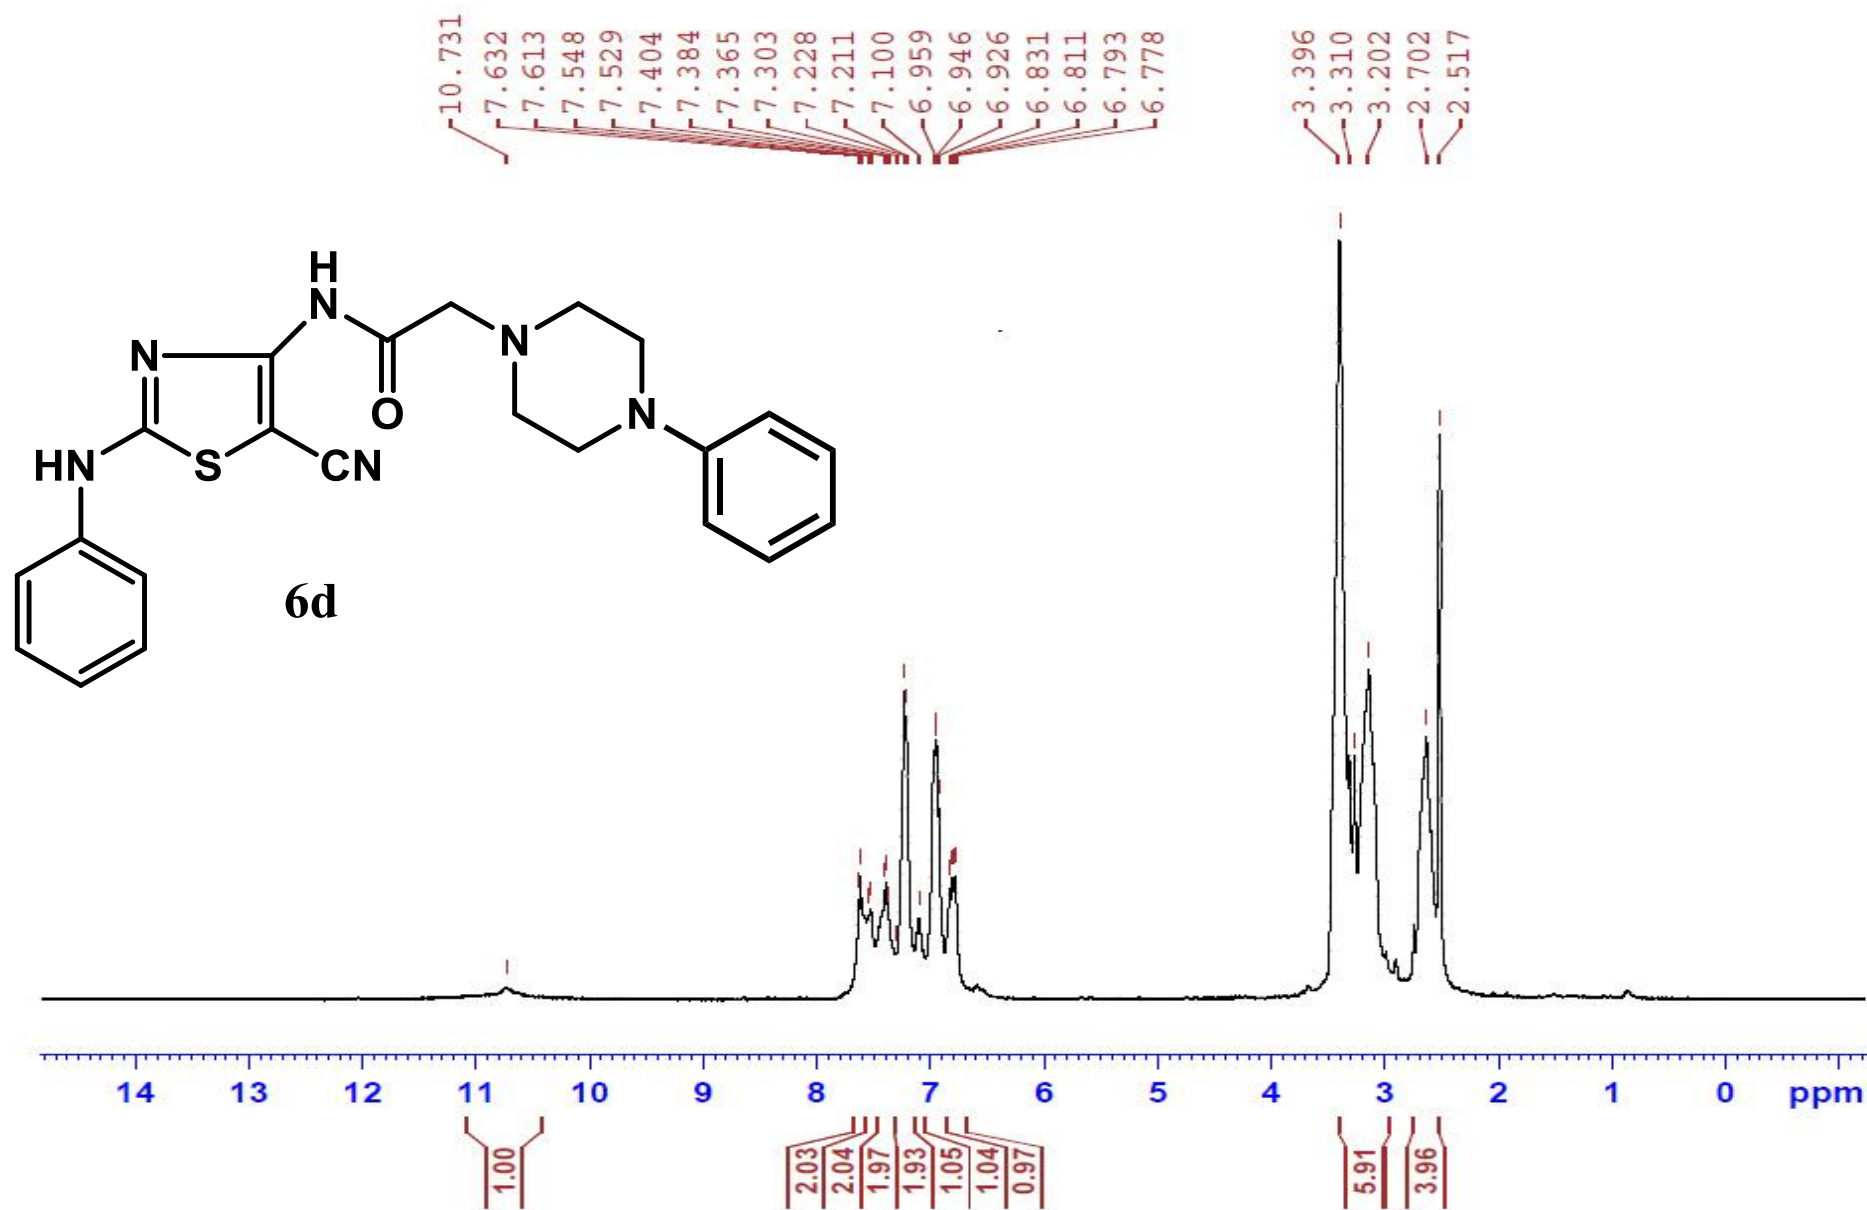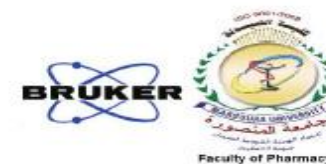

Current Data Parameters  
NAME alaa abdallah 4A -M  
EXPNO 10  
PROCNO 1

F2 - Acquisition Parameters  
Date\_ 20201130  
Time 13.32 h  
INSTRUM spect  
PROBHD Z108618\_0945 (  
PULPROG zg30  
TD 65536  
SOLVENT DMSO  
NS 16  
DS 2  
SWH 8012.820 Hz  
FIDRES 0.244532 Hz  
AQ 4.0894465 sec  
RG 112.56  
DW 62.400 usec  
DE 6.50 usec  
TE 292.9 K  
D1 1.00000000 sec  
TD0 1  
SFO1 400.2024712 MHz  
NUC1 1H  
P1 13.50 usec  
PLW1 13.00000000 W

F2 - Processing parameters  
SI 65536  
SF 400.2000000 MHz  
WDW EM  
SSB 0  
LB 0.30 Hz  
GB 0  
PC 1.00

alaa abdallah 6 -M c13

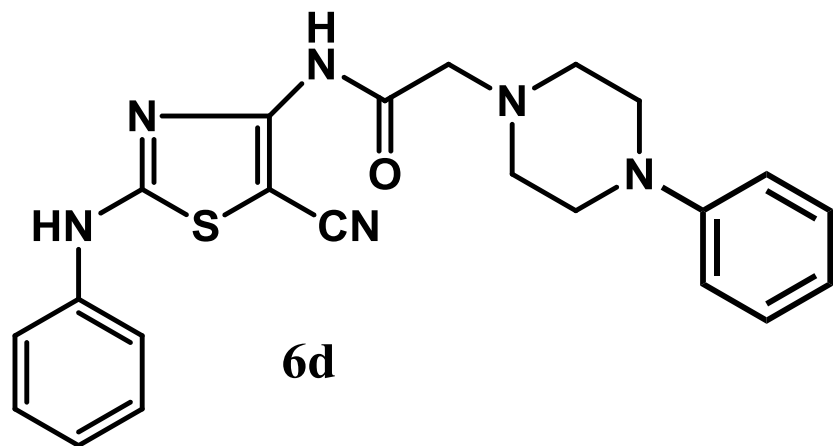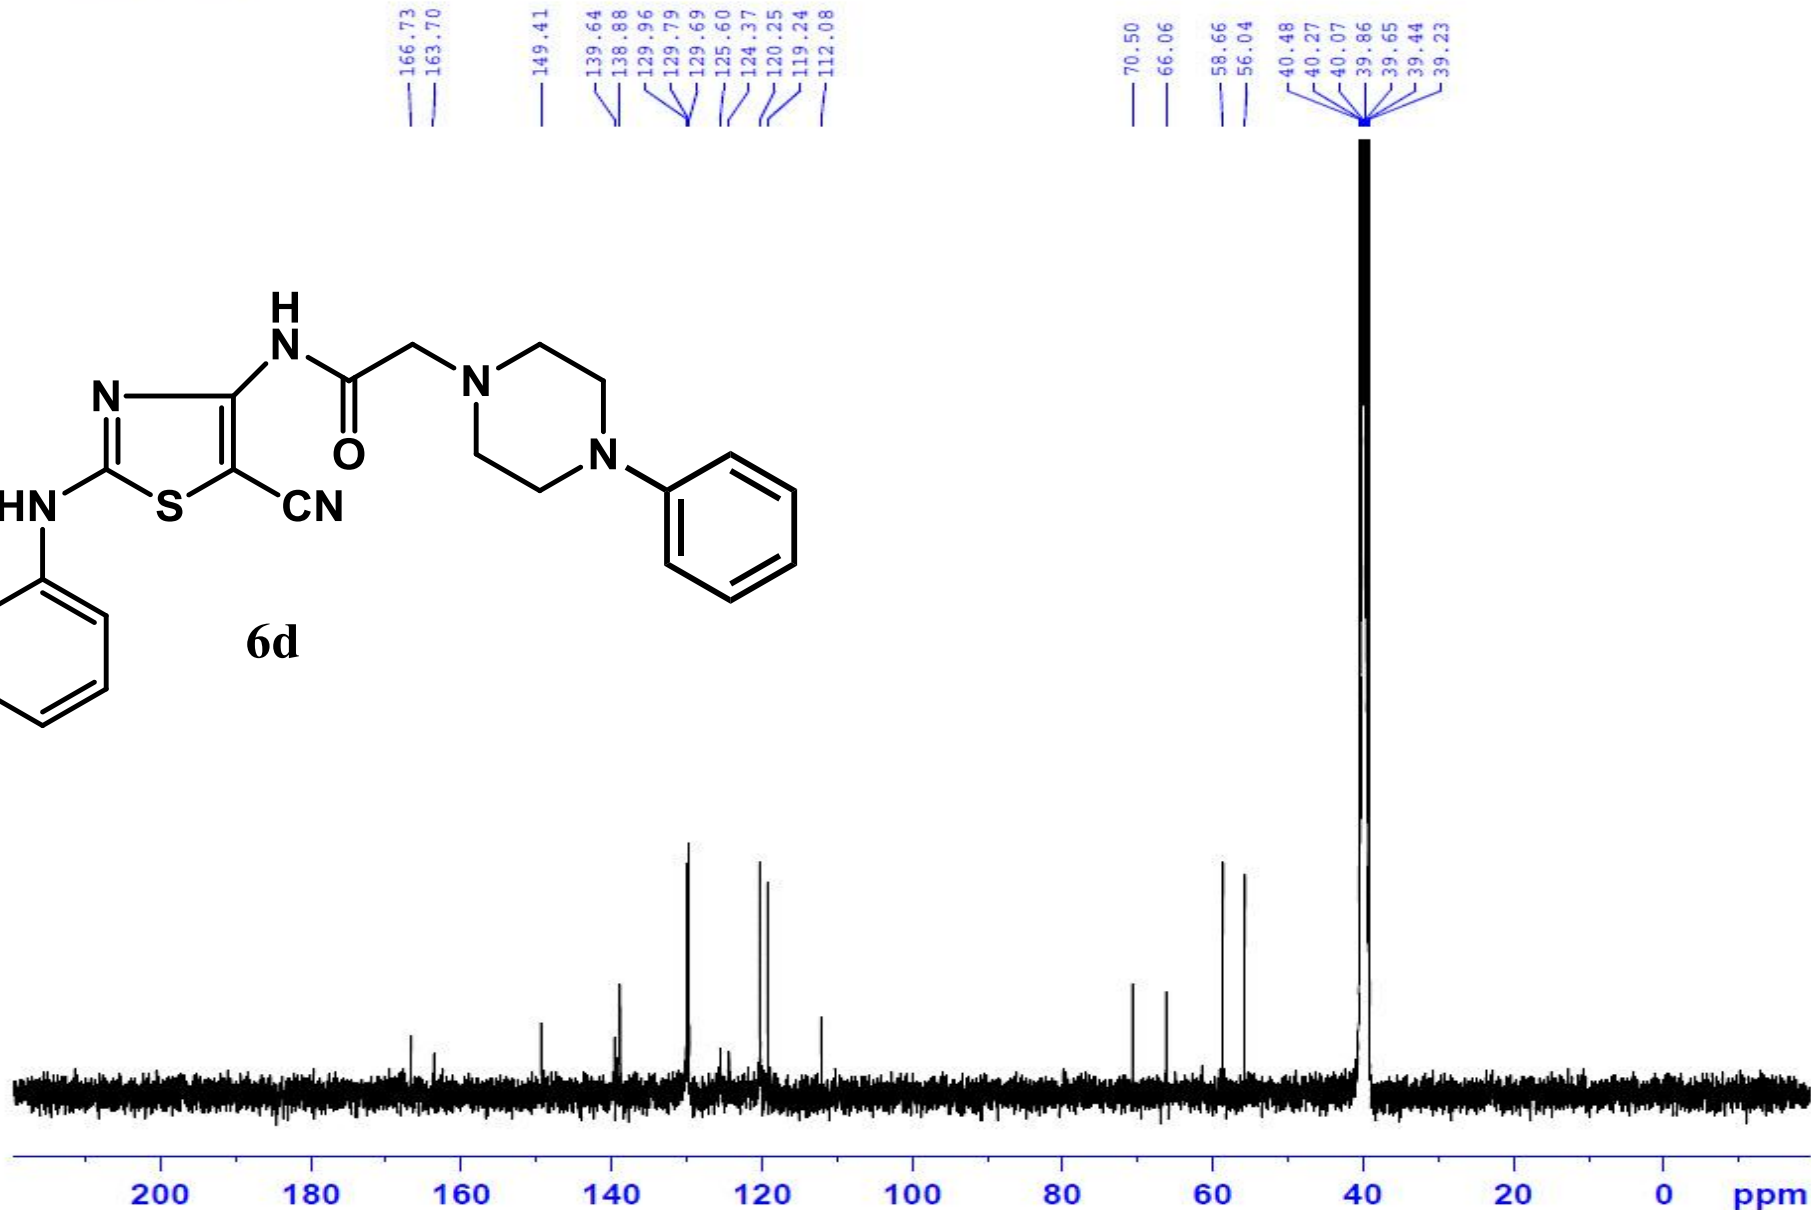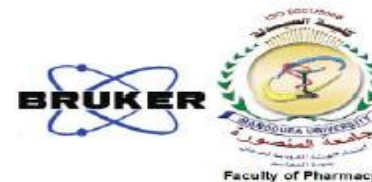

Current Data Parameters  
NAME alaa abdallah 6 -M c13  
EXPNO 10  
PROCNO 1

F2 - Acquisition Parameters  
Date\_ 20210302  
Time\_ 1.23 h  
INSTRUM spect  
PROBHD Z108618\_0945 (   
PULPROG zgpg30  
TD 65536  
SOLVENT DMSO  
NS 2100  
DS 4  
SWH 24038.461 Hz  
FIDRES 0.733596 Hz  
AQ 1.3631488 sec  
RG 197.77  
DW 20.800 usec  
DE 6.50 usec  
TE 293.9 K  
D1 2.00000000 sec  
D11 0.03000000 sec  
TD0 1  
SFO1 100.6404331 MHz  
NUC1 13C  
P1 10.00 usec  
PLW1 47.00000000 W  
SFO2 400.2016008 MHz  
NUC2 1H  
CPDPRG[2] waltz16  
PCPD2 90.00 usec  
PLW2 13.00000000 W  
PLW12 0.29249999 W  
PLW13 0.14713000 W

F2 - Processing parameters  
SI 32768  
SF 100.6303700 MHz  
WDW EM  
SSB 0  
LB 1.00 Hz  
GB 0  
PC 1.40

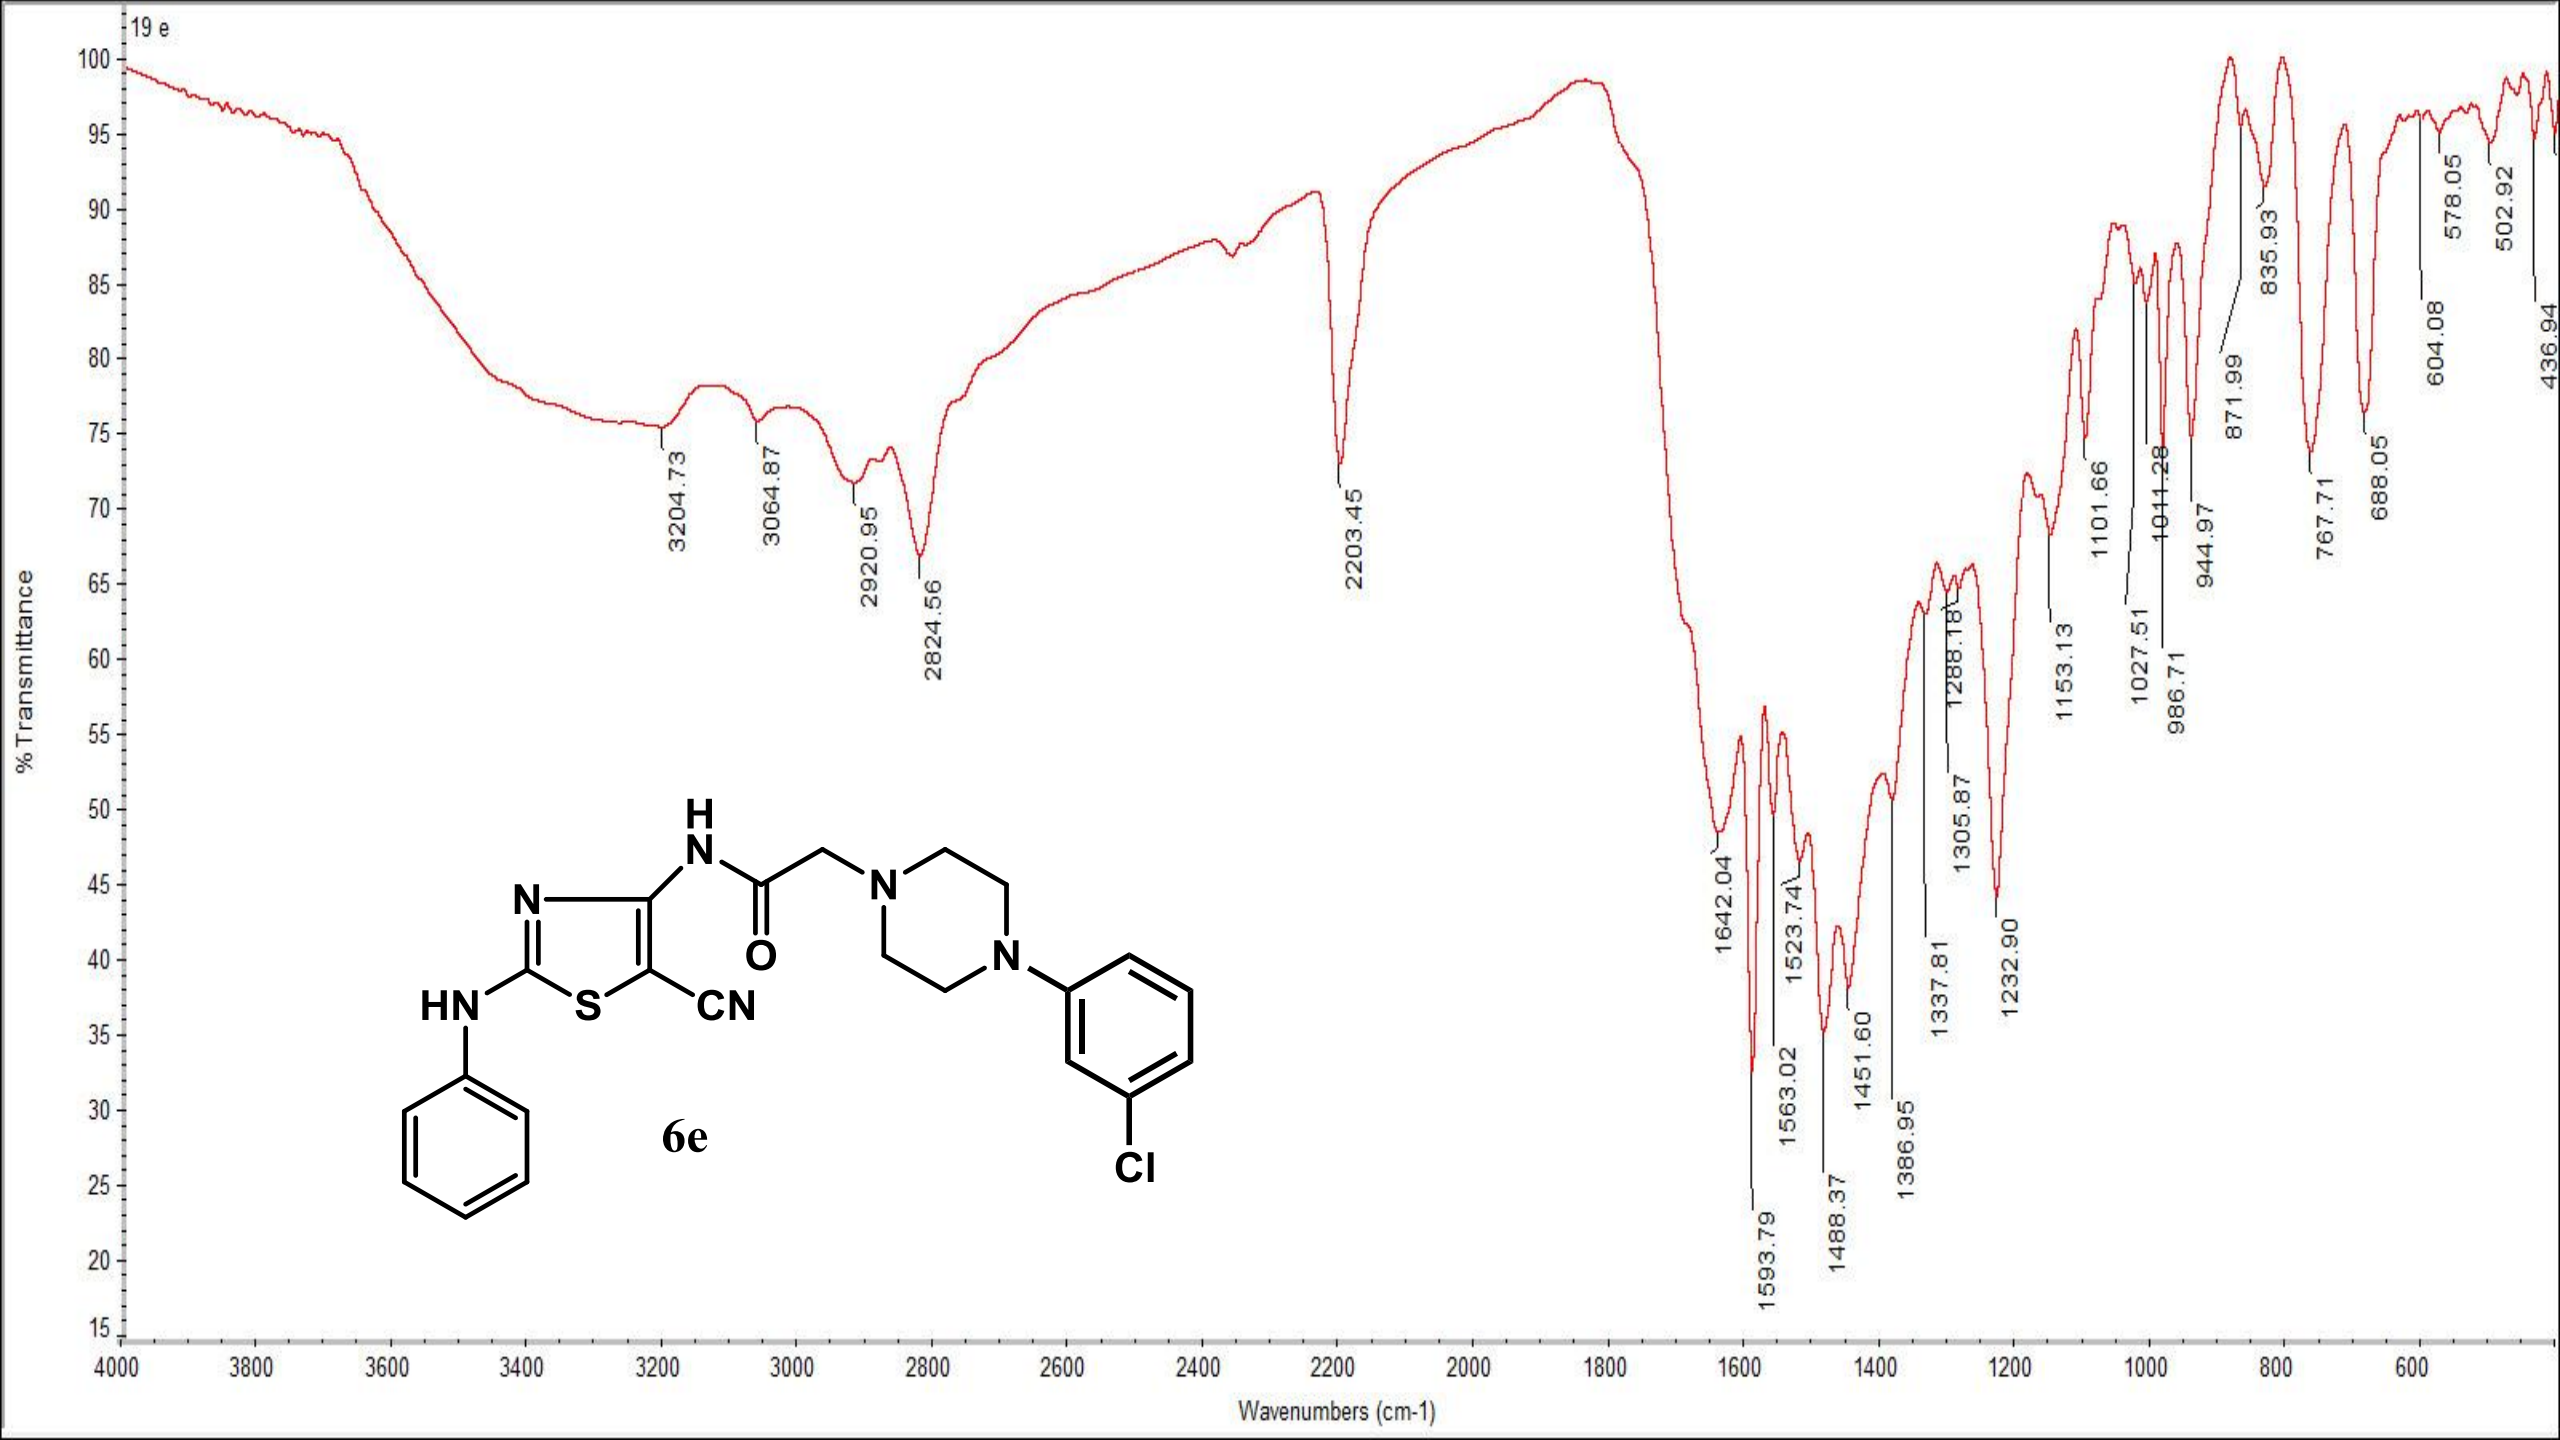

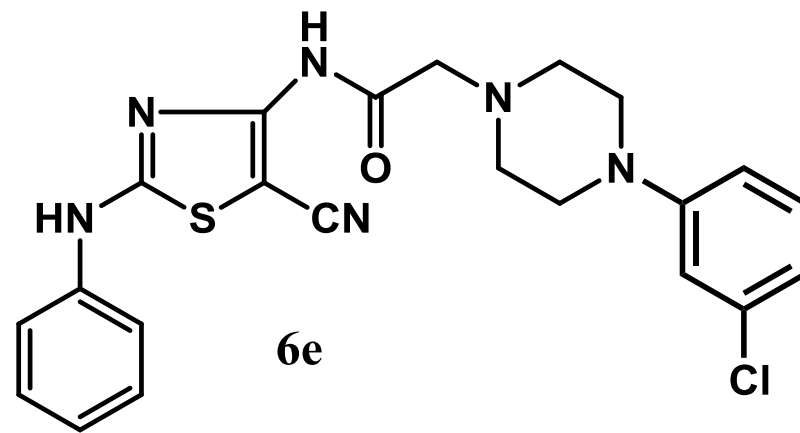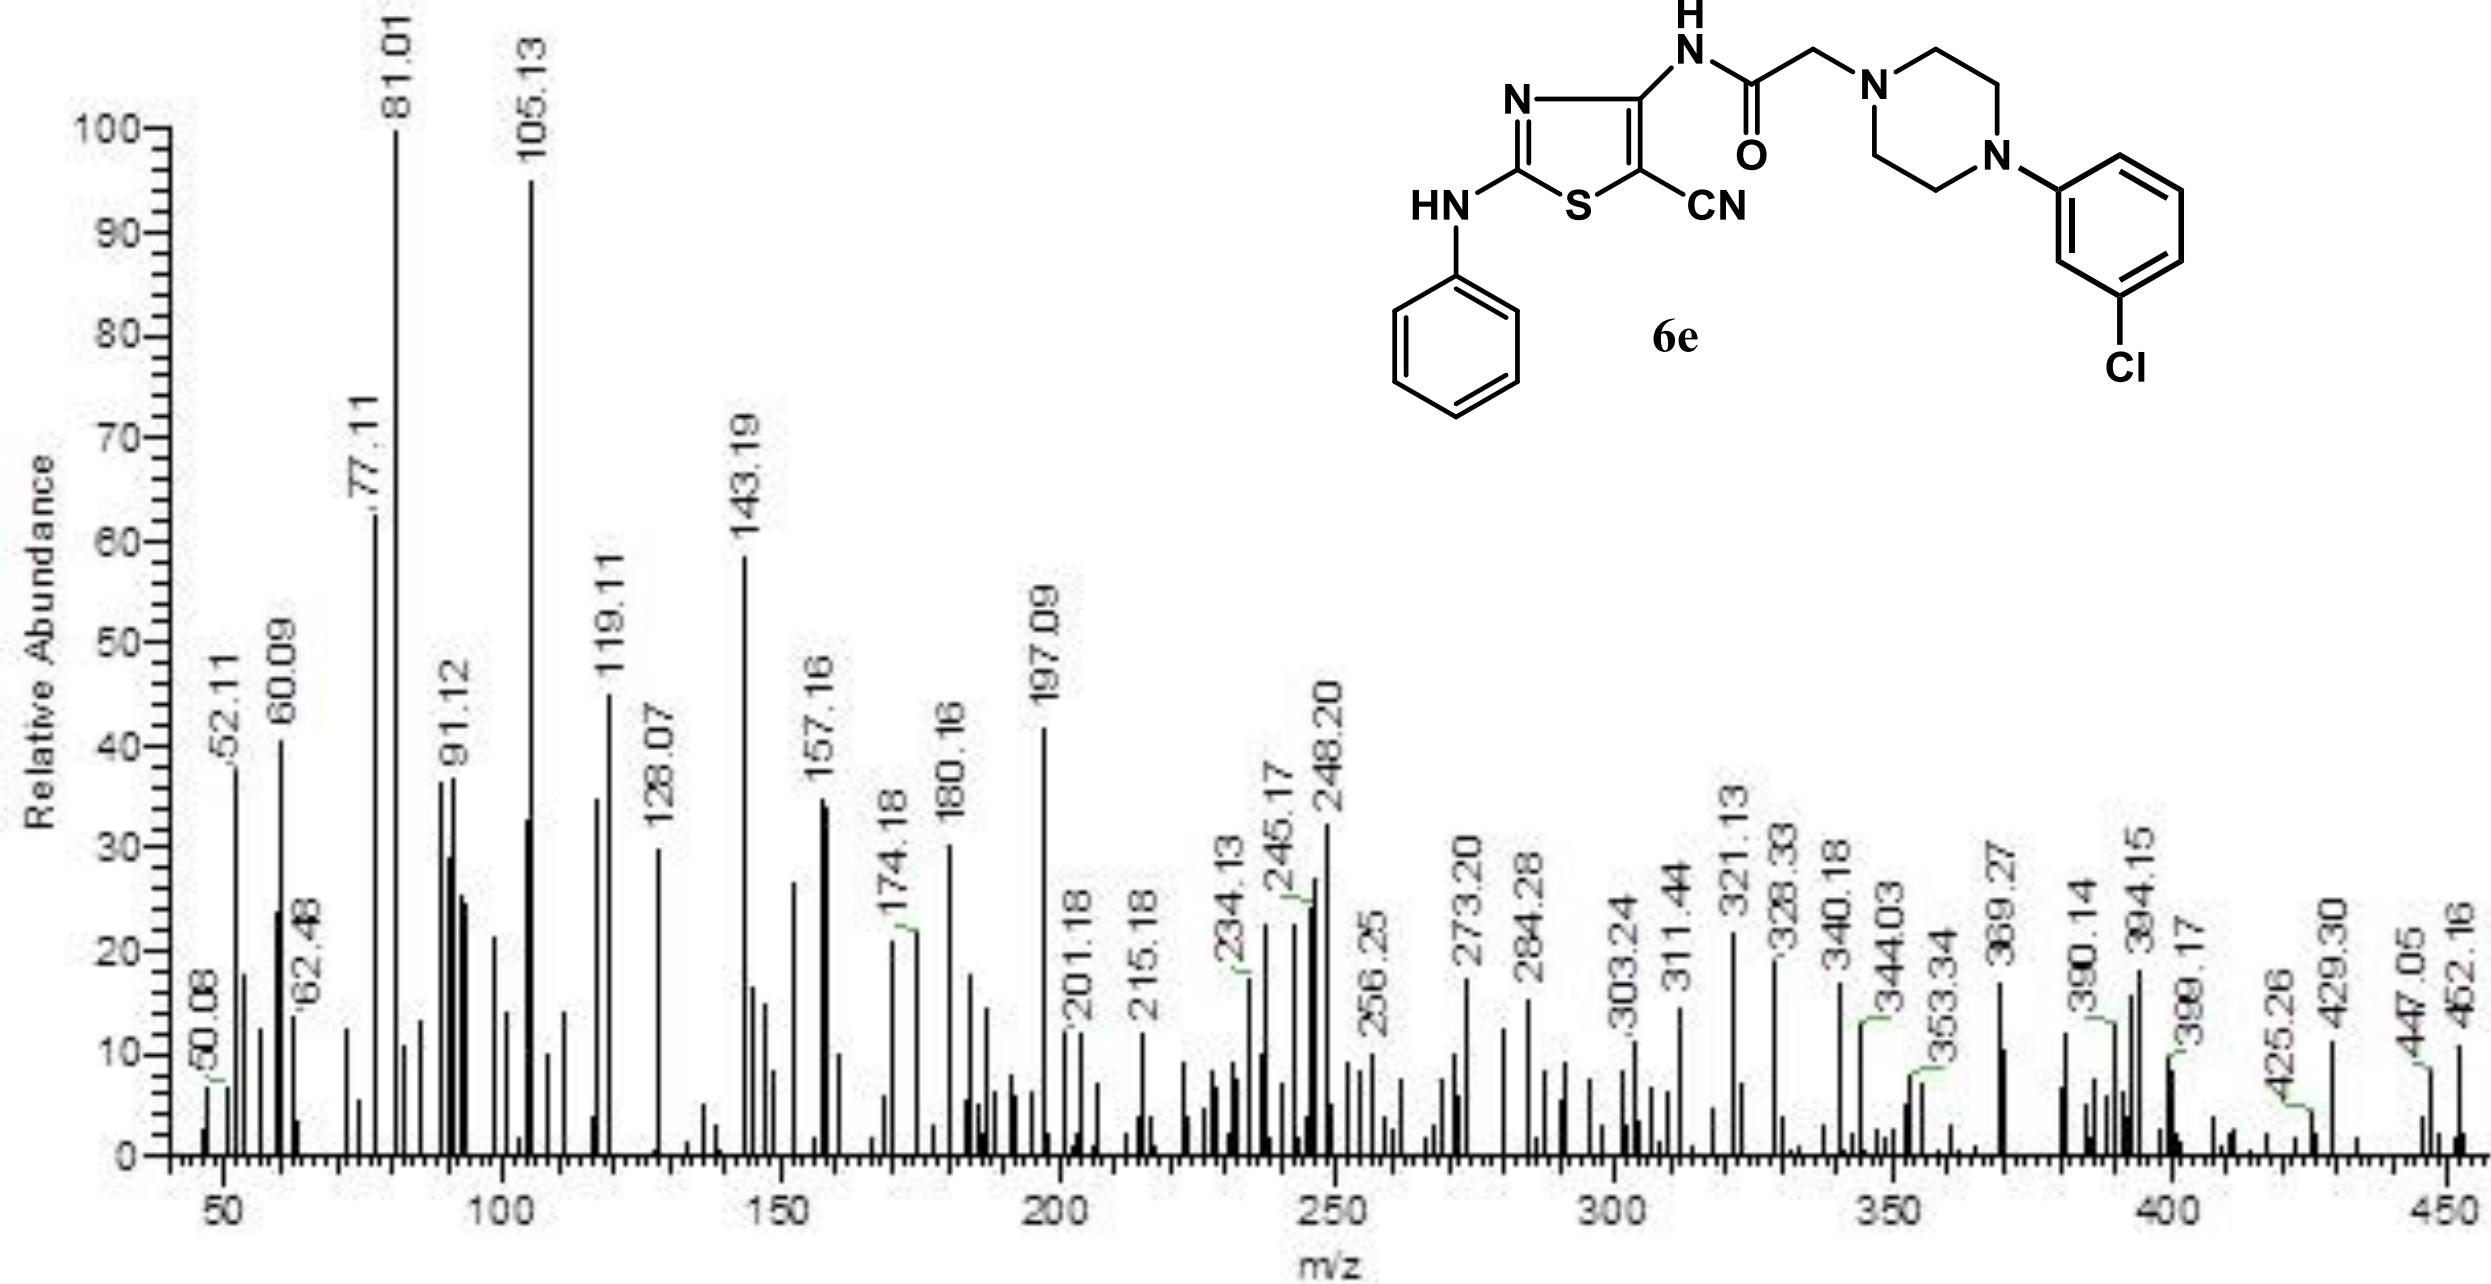



Alaa abdallah-7A-Hnmr-Es

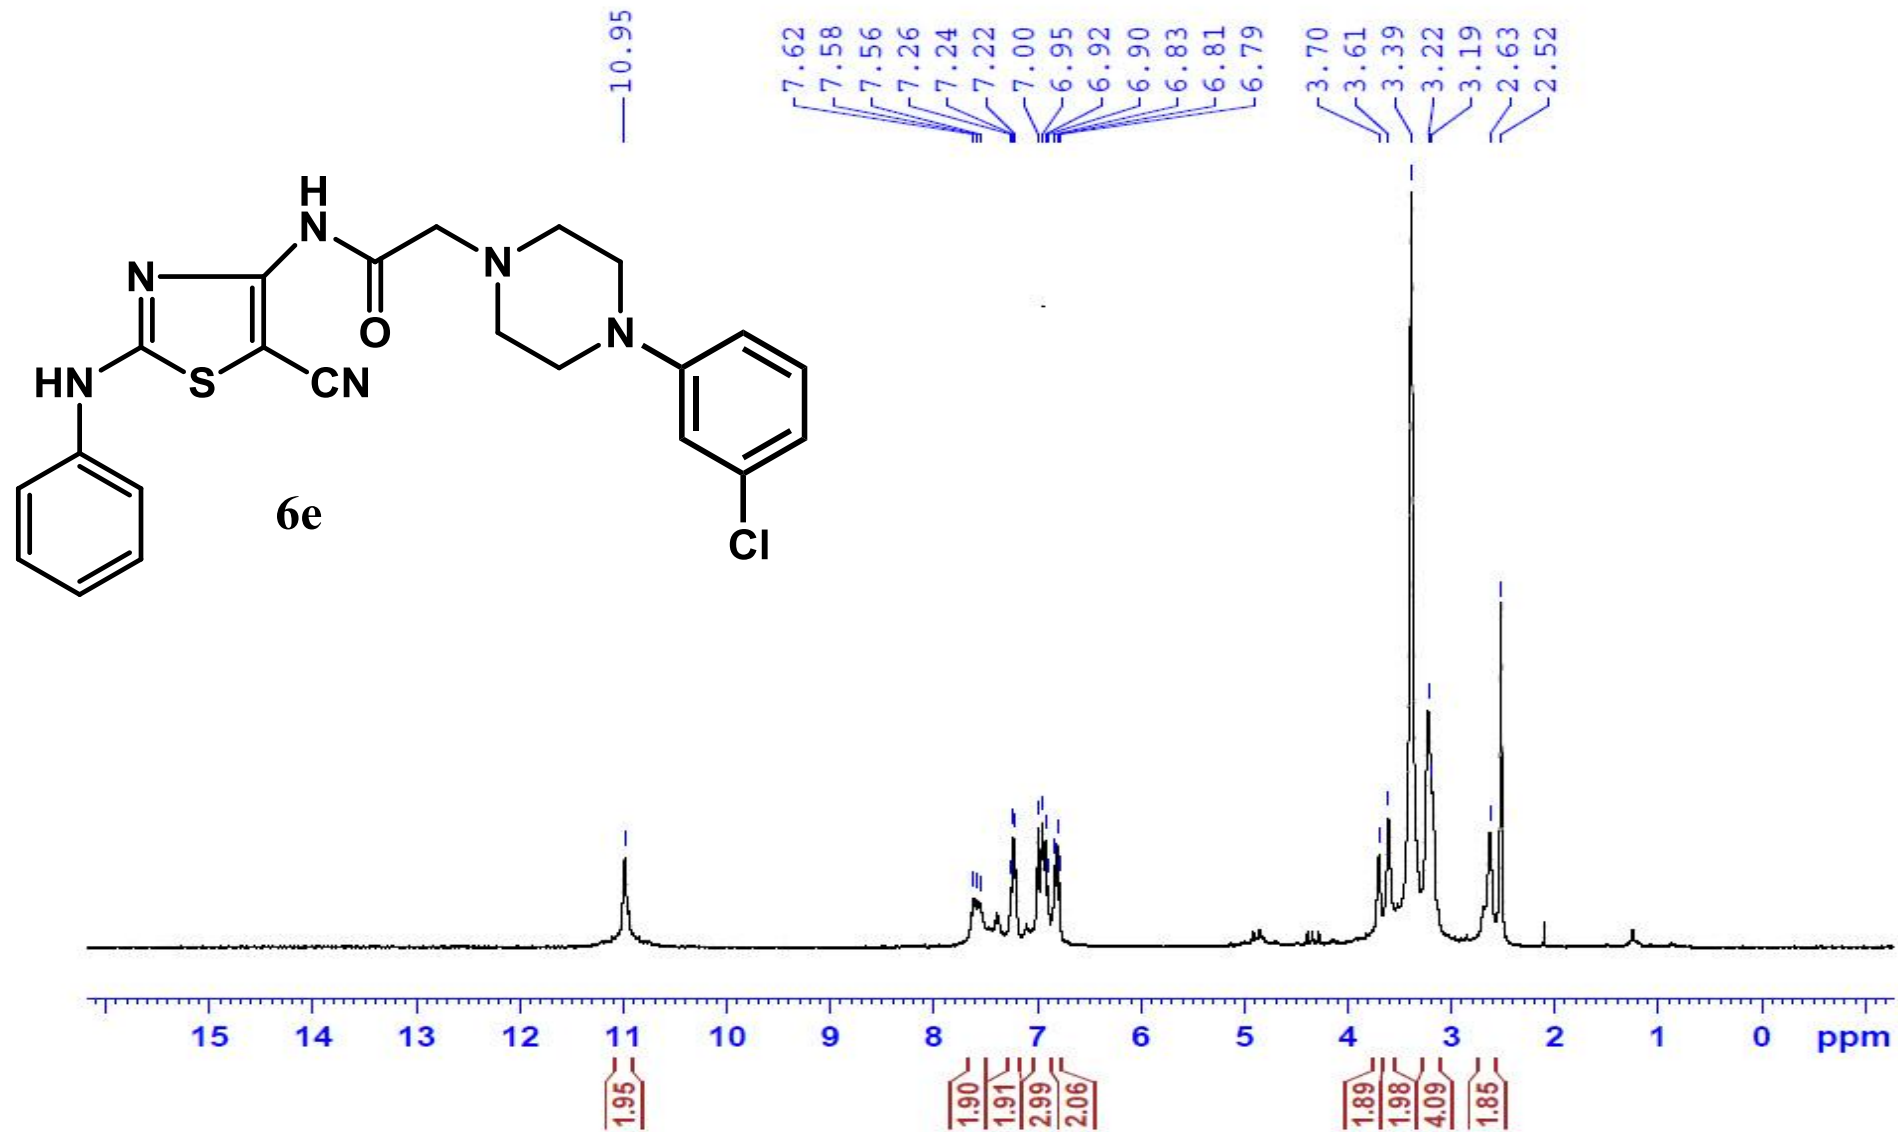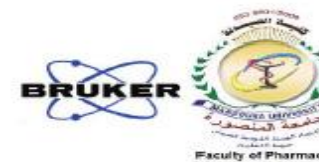

Current Data Parameters  
NAME Alaa abdallah-7A-Hr  
EXPNO 10  
PROCNO 1

F2 - Acquisition Parameters  
Date\_ 20210211  
Time 8.00 h  
INSTRUM spect  
PROBHD Z108618\_0945 (   
PULPROG zg30  
TD 65536  
SOLVENT DMSO  
NS 16  
DS 2  
SWH 8012.820 Hz  
FIDRES 0.244532 Hz  
AQ 4.0894465 sec  
RG 120.93  
DW 62.400 usec  
DE 6.50 usec  
TE 292.9 K  
D1 1.0000000 sec  
TD0 1  
SFO1 400.2024712 MHz  
NUC1 1H  
P1 13.50 usec  
PLW1 13.0000000 W

F2 - Processing parameters  
SI 65536  
SF 400.2000000 MHz  
WDW EM  
SSB 0  
LB 0.30 Hz  
GB 0  
PC 1.00

alaa abdallah 7a -M c13

168.43  
163.66  
152.46

134.30  
131.00  
130.95  
129.74  
118.97  
118.70  
115.39  
115.08  
114.49  
114.21

71.57  
62.63  
57.39  
53.43  
40.41  
40.20  
39.99  
39.78  
39.57  
39.37  
39.16

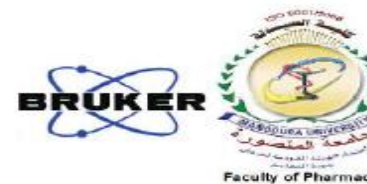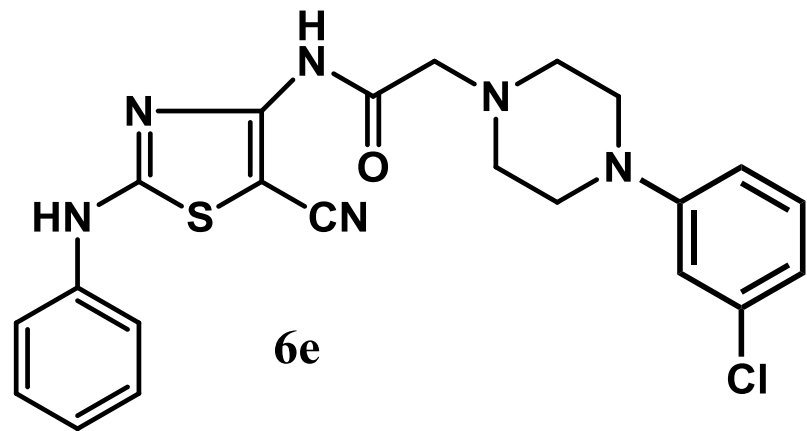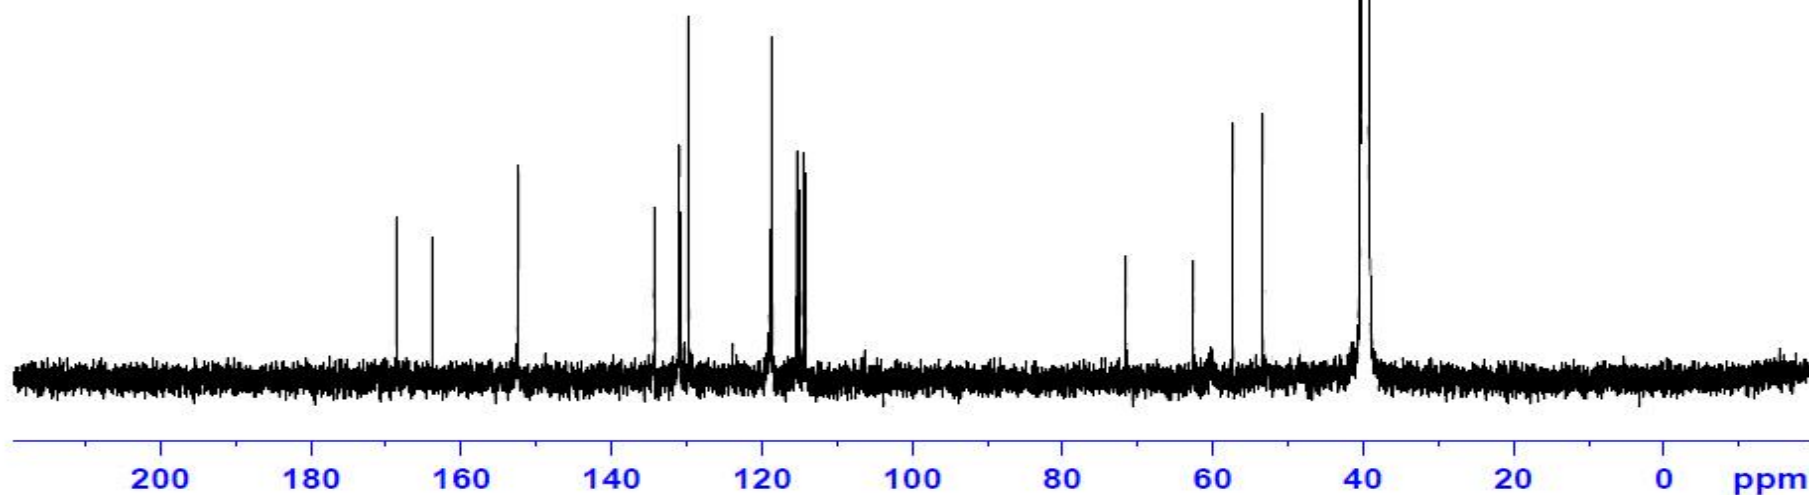

Current Data Parameters  
NAME alaa abdallah 7a -M c13  
EXPNO 10  
PROCNO 1

F2 - Acquisition Parameters  
Date\_ 20210302  
Time 5.30 h  
INSTRUM spect  
PROBHD Z108618\_0945 (   
PULPROG zgpg30  
TD 65536  
SOLVENT DMSO  
NS 2100  
DS 4  
SWH 24038.461 Hz  
FIDRES 0.733596 Hz  
AQ 1.3631488 sec  
RG 197.77  
DW 20.800 usec  
DE 6.50 usec  
TE 294.1 K  
D1 2.00000000 sec  
D11 0.03000000 sec  
TD0 1  
SFO1 100.6404331 MHz  
NUC1 13C  
P1 10.00 usec  
PLW1 47.00000000 W  
SFO2 400.2016008 MHz  
NUC2 1H  
CPDPRG[2] waltz16  
PCPD2 90.00 usec  
PLW2 13.00000000 W  
PLW12 0.29249999 W  
PLW13 0.14713000 W

F2 - Processing parameters  
SI 32768  
SF 100.6303700 MHz  
WDW EM  
SSB 0  
LB 1.00 Hz  
GB 0  
PC 1.40

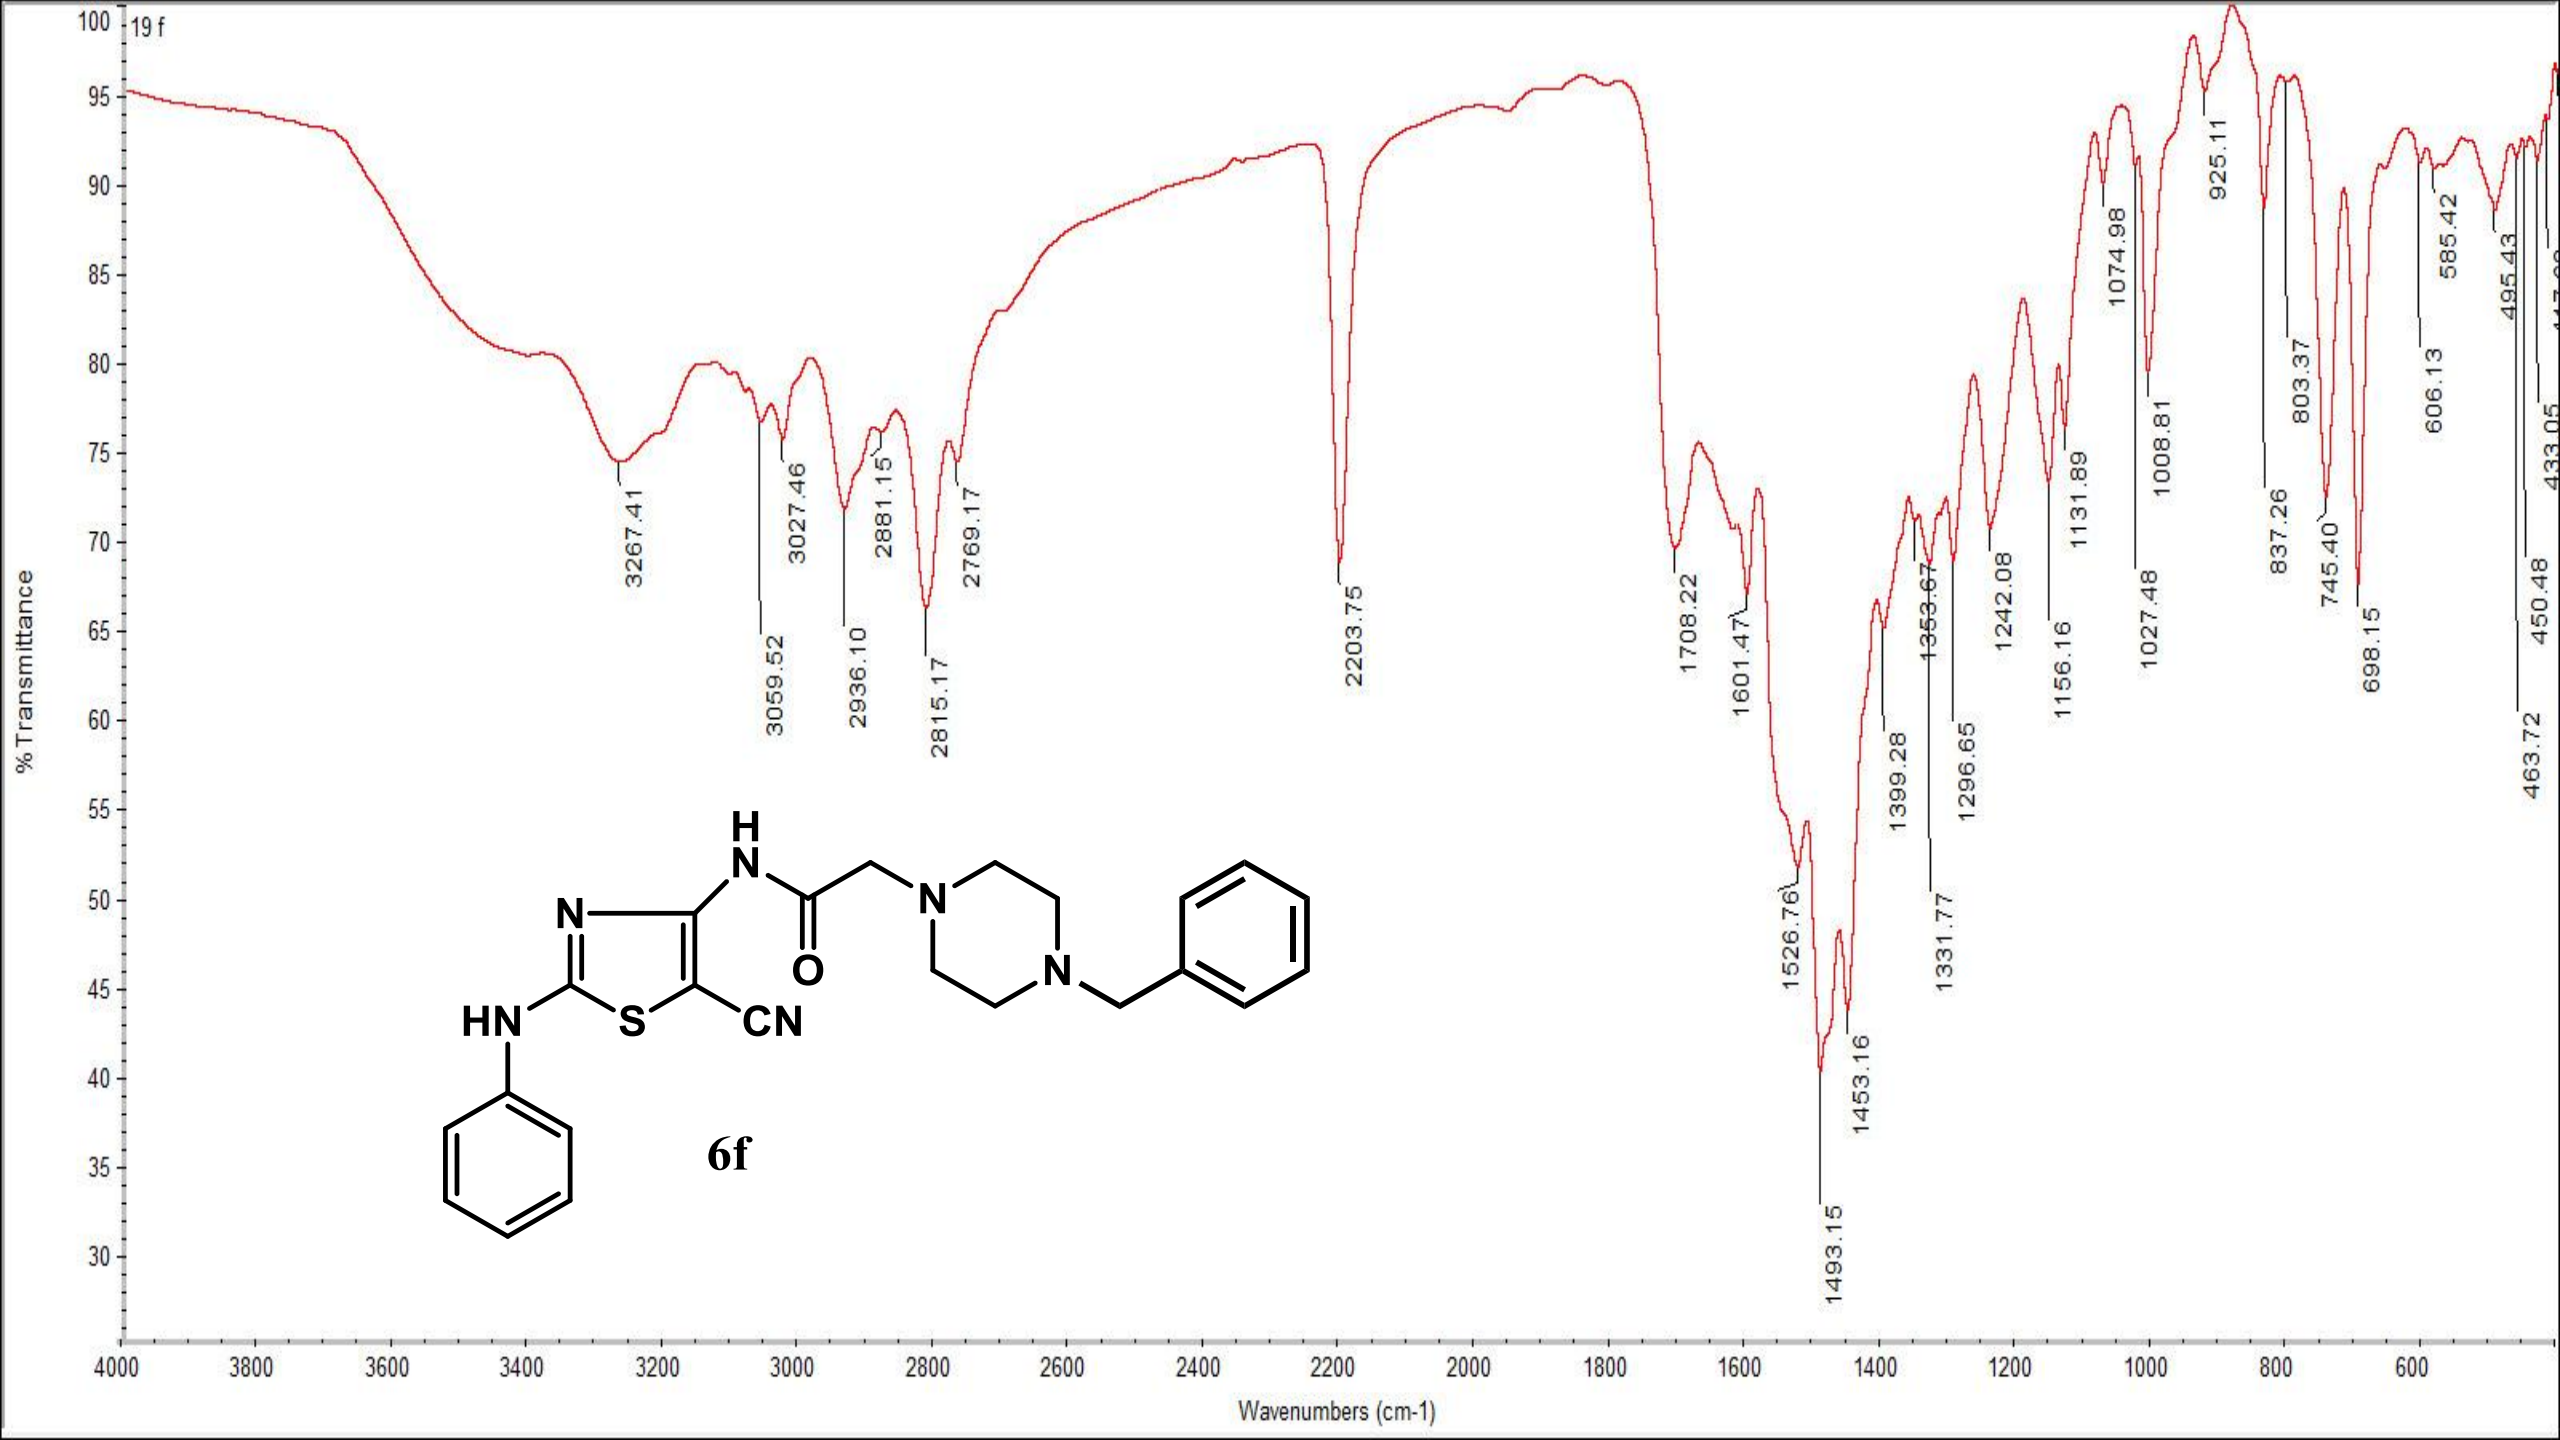

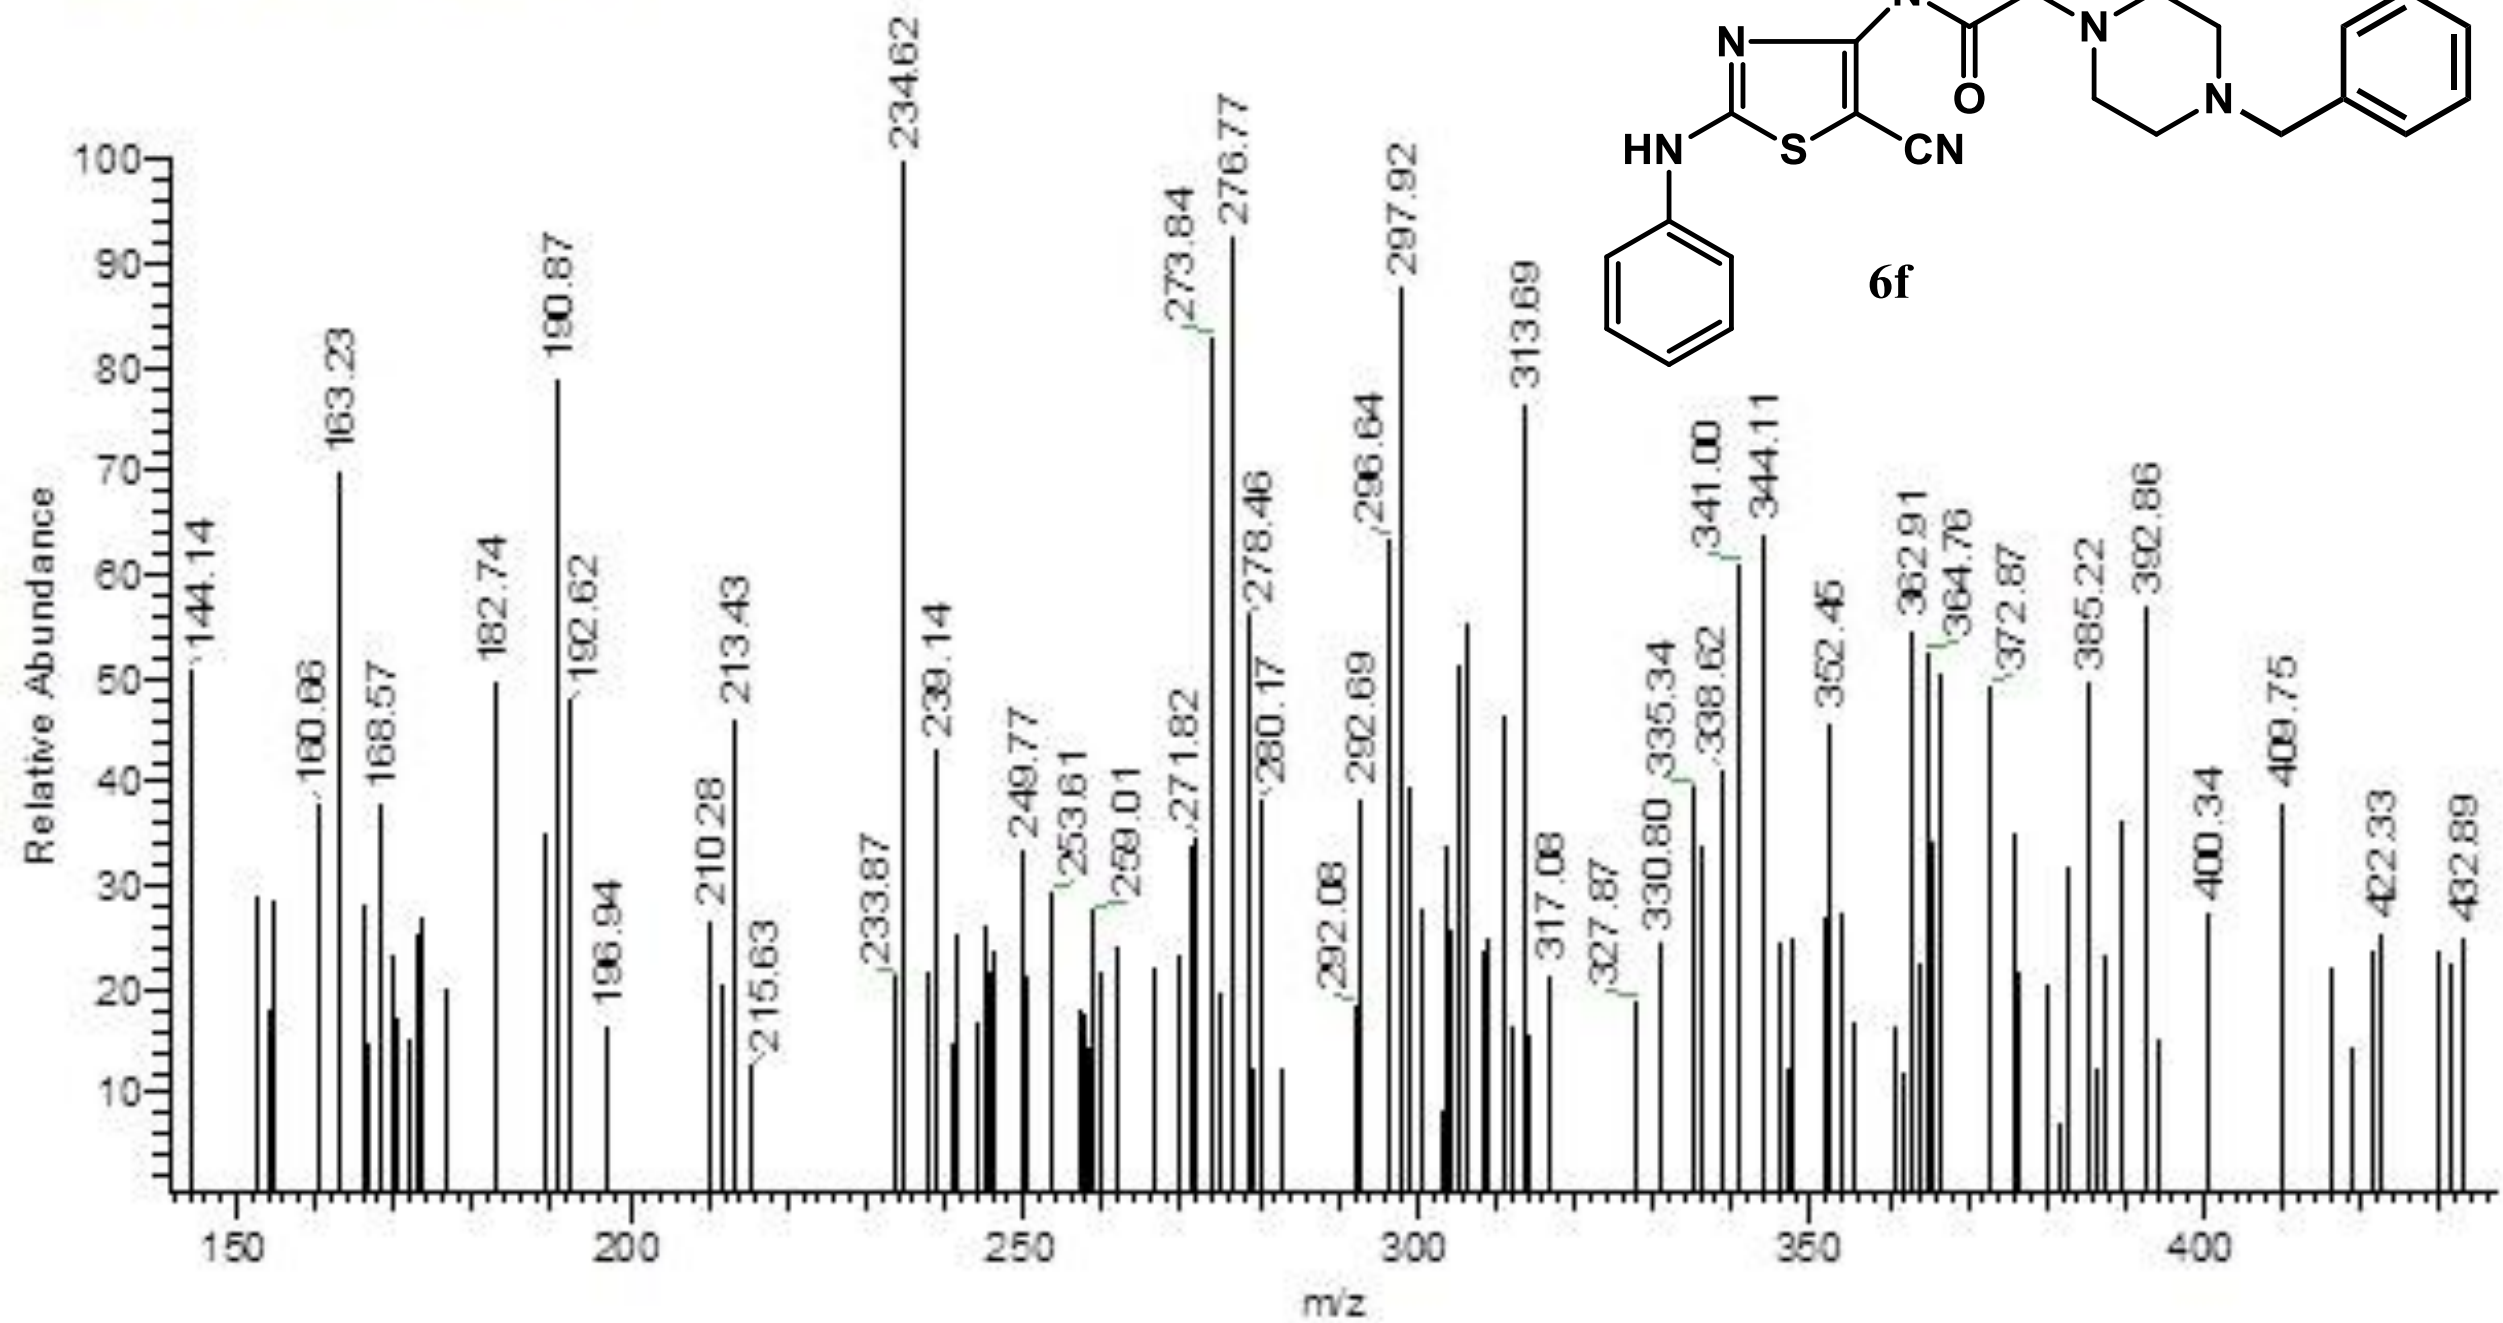



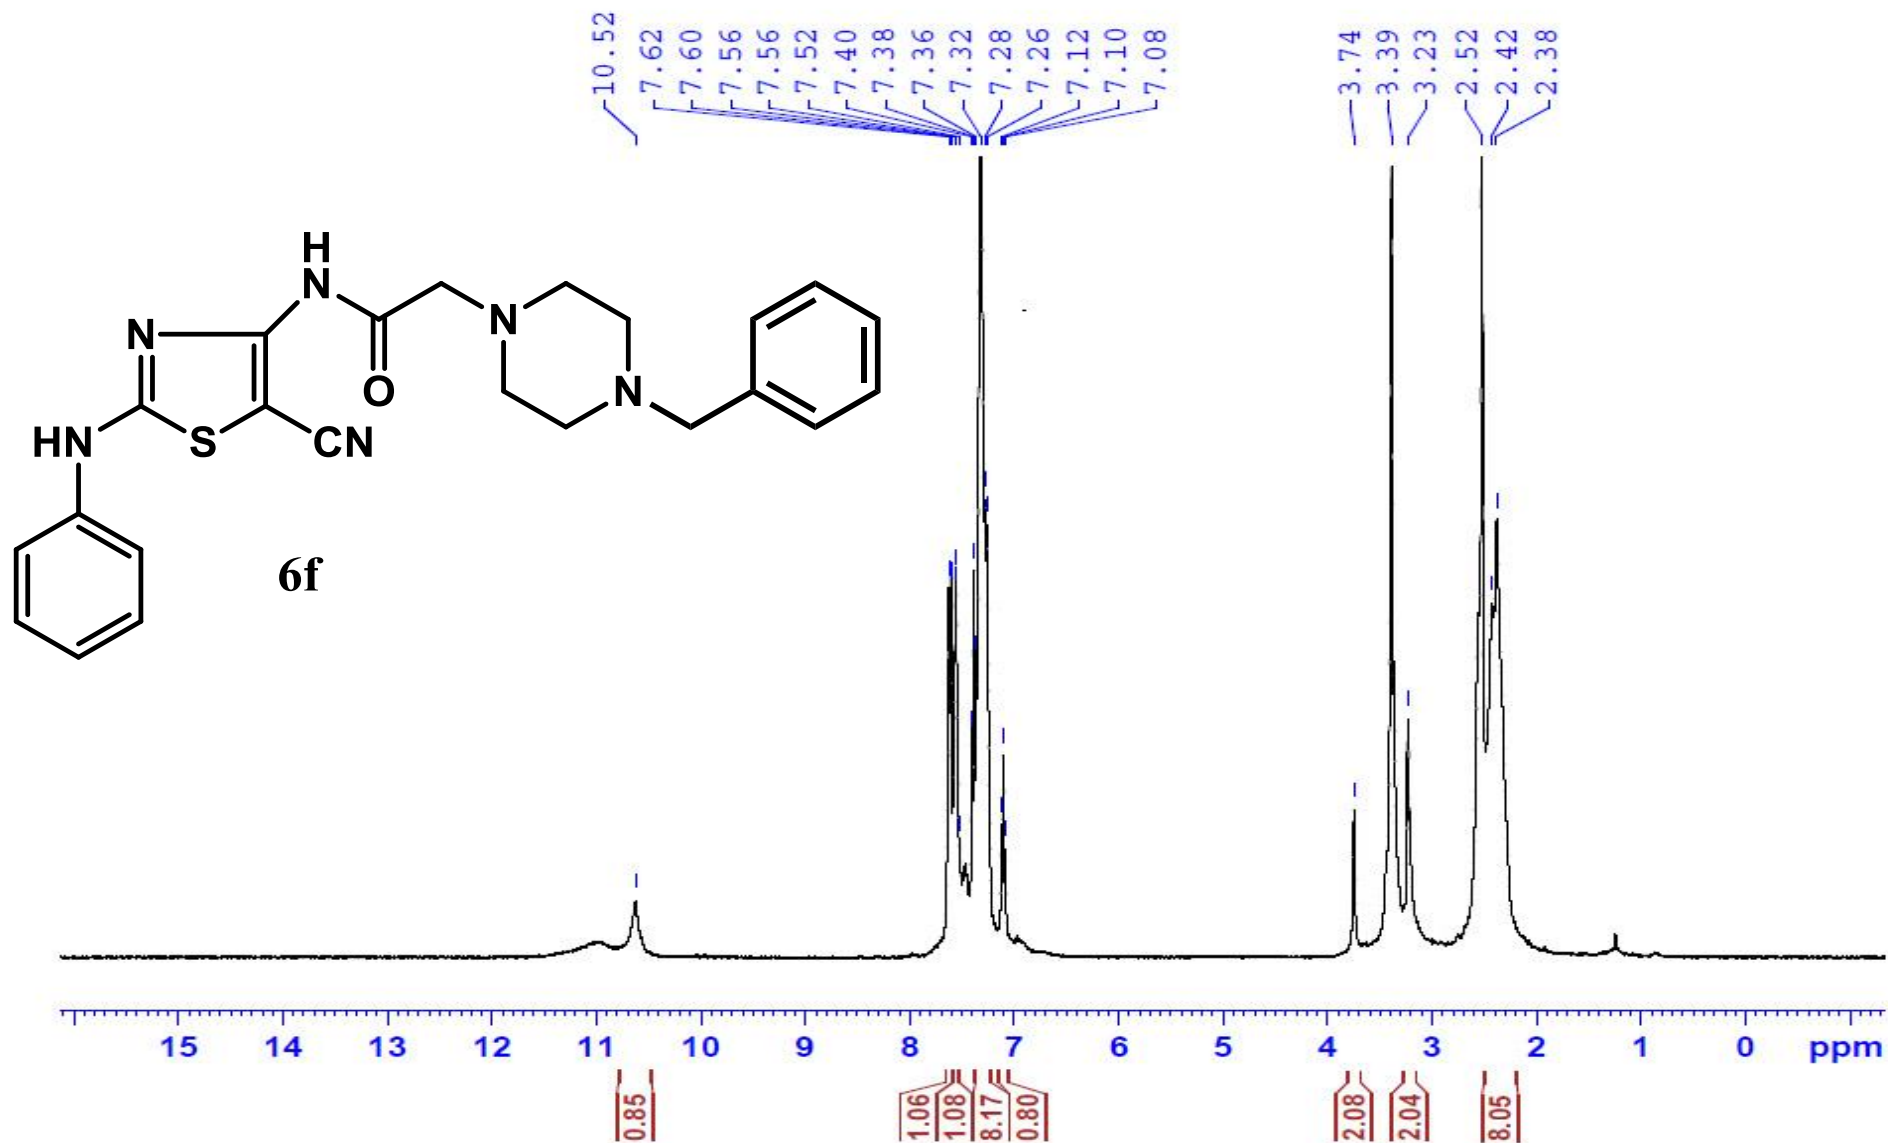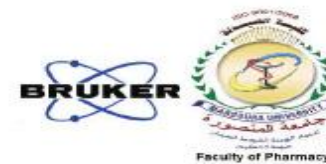

Current Data Parameters  
 NAME Alaa abdallah-8A-HR  
 EXPNO 10  
 PROCNO 1

F2 - Acquisition Parameters  
 Date\_ 20210211  
 Time 8.05 h  
 INSTRUM spect  
 PROBHD Z108618\_0945 ( )  
 PULPROG zg30  
 TD 65536  
 SOLVENT DMSO  
 NS 16  
 DS 2  
 SWH 8012.820 HZ  
 FIDRES 0.244532 HZ  
 AQ 4.0894465 sec  
 RG 99.3  
 DW 62.400 usec  
 DE 6.50 usec  
 TE 293.0 K  
 D1 1.0000000 sec  
 TD0 1  
 SFO1 400.2024712 MHz  
 NUC1 1H  
 P1 13.50 usec  
 PLW1 13.0000000 W

F2 - Processing parameters  
 SI 65536  
 SF 400.2000000 MHz  
 WDW EM  
 SSB 0  
 LB 0.30 HZ  
 GB 0  
 PC 1.00

alaa abdallah 8a -M c13

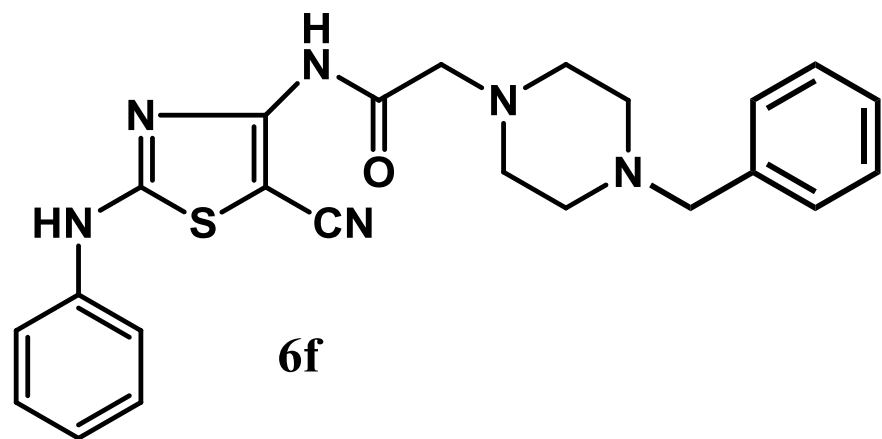

—168.38  
—164.43  
—151.73  
—144.96  
—138.63  
129.36  
128.68  
128.64  
127.39  
123.80  
—118.82  
—113.47  
—77.46  
61.19  
60.94  
53.02  
52.75  
40.58  
40.37  
40.16  
39.95  
39.74  
39.53  
39.33

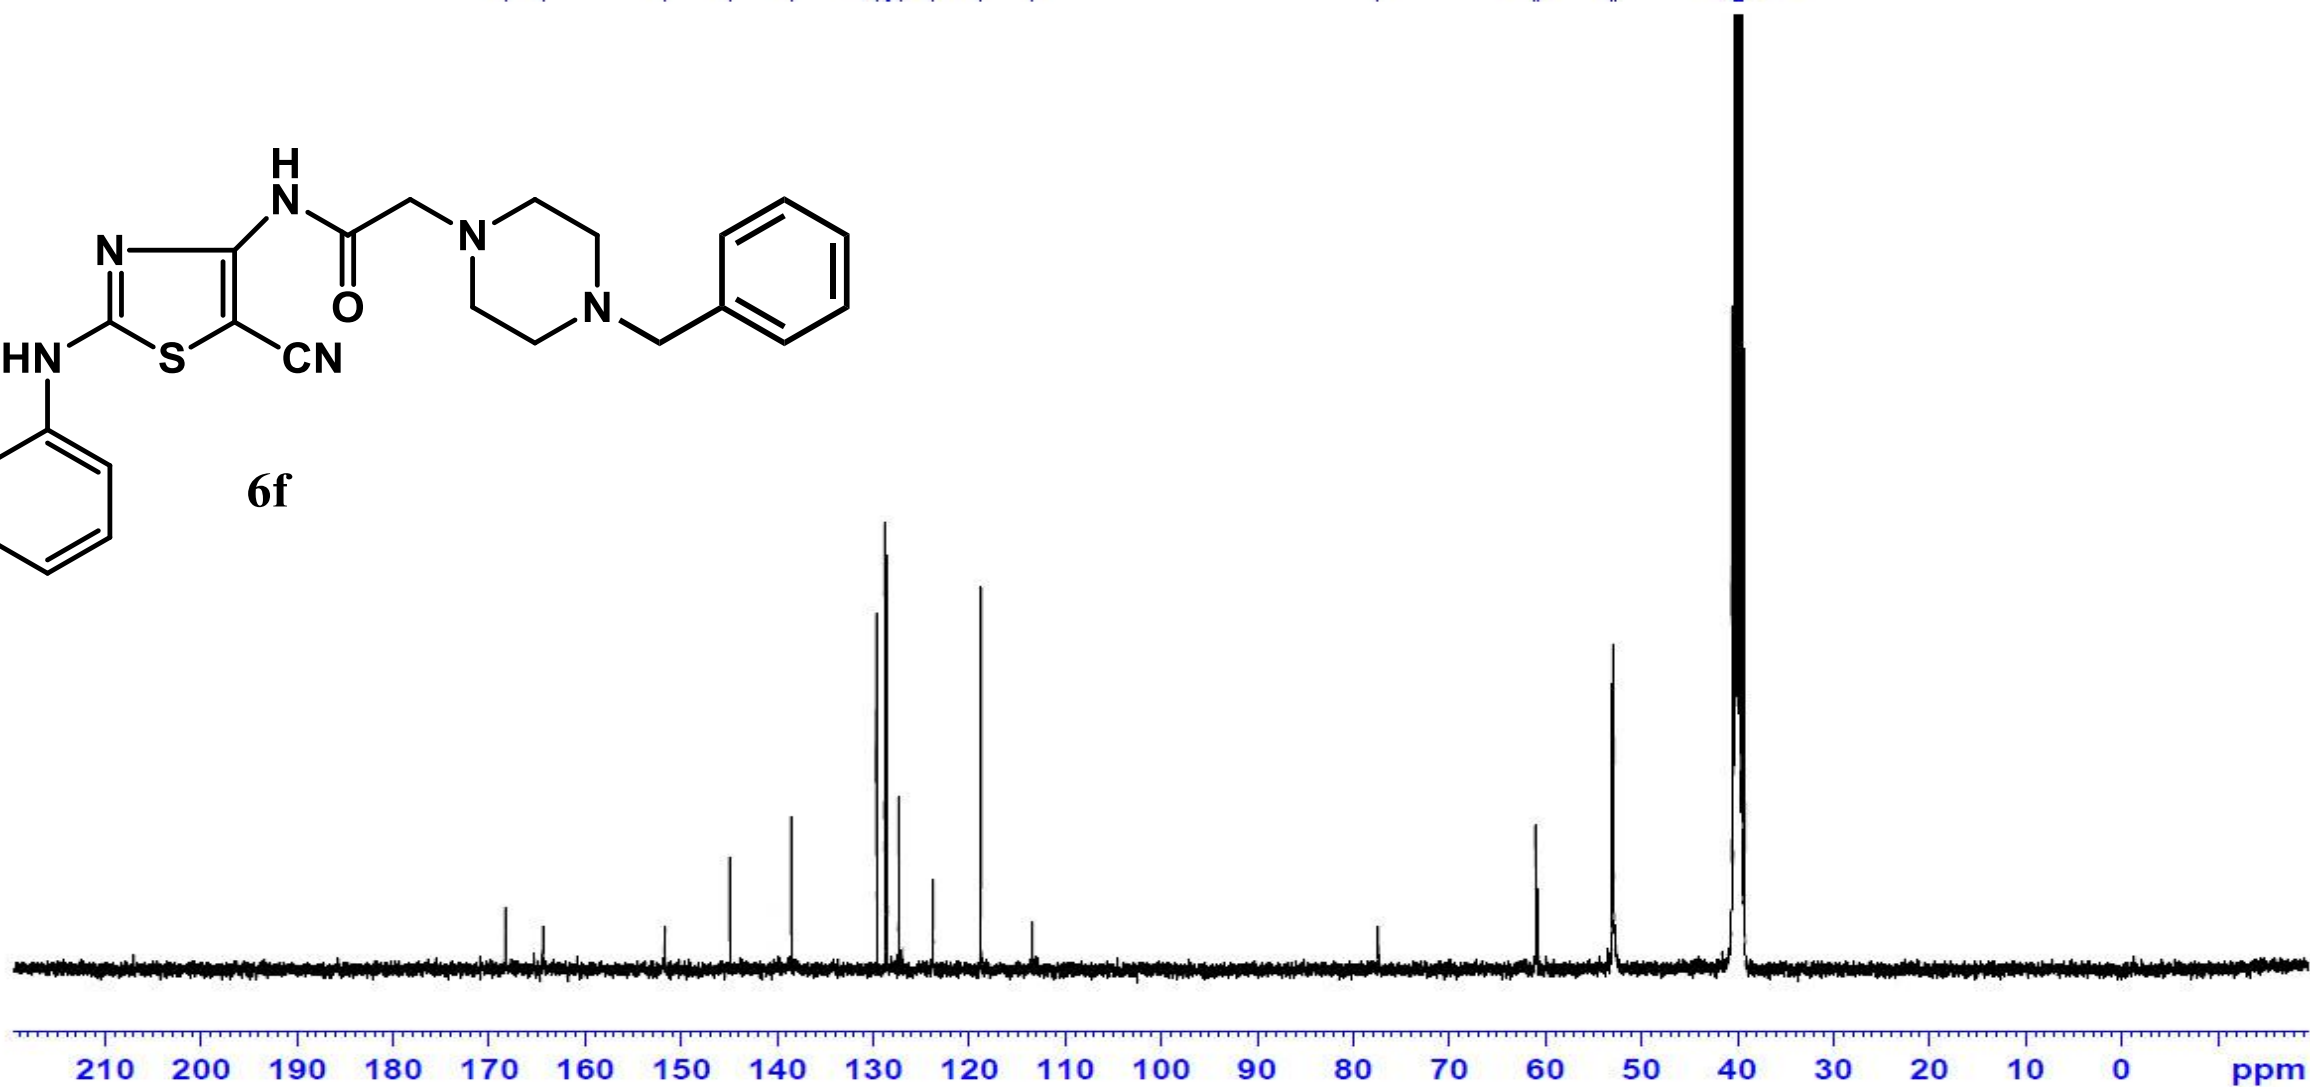

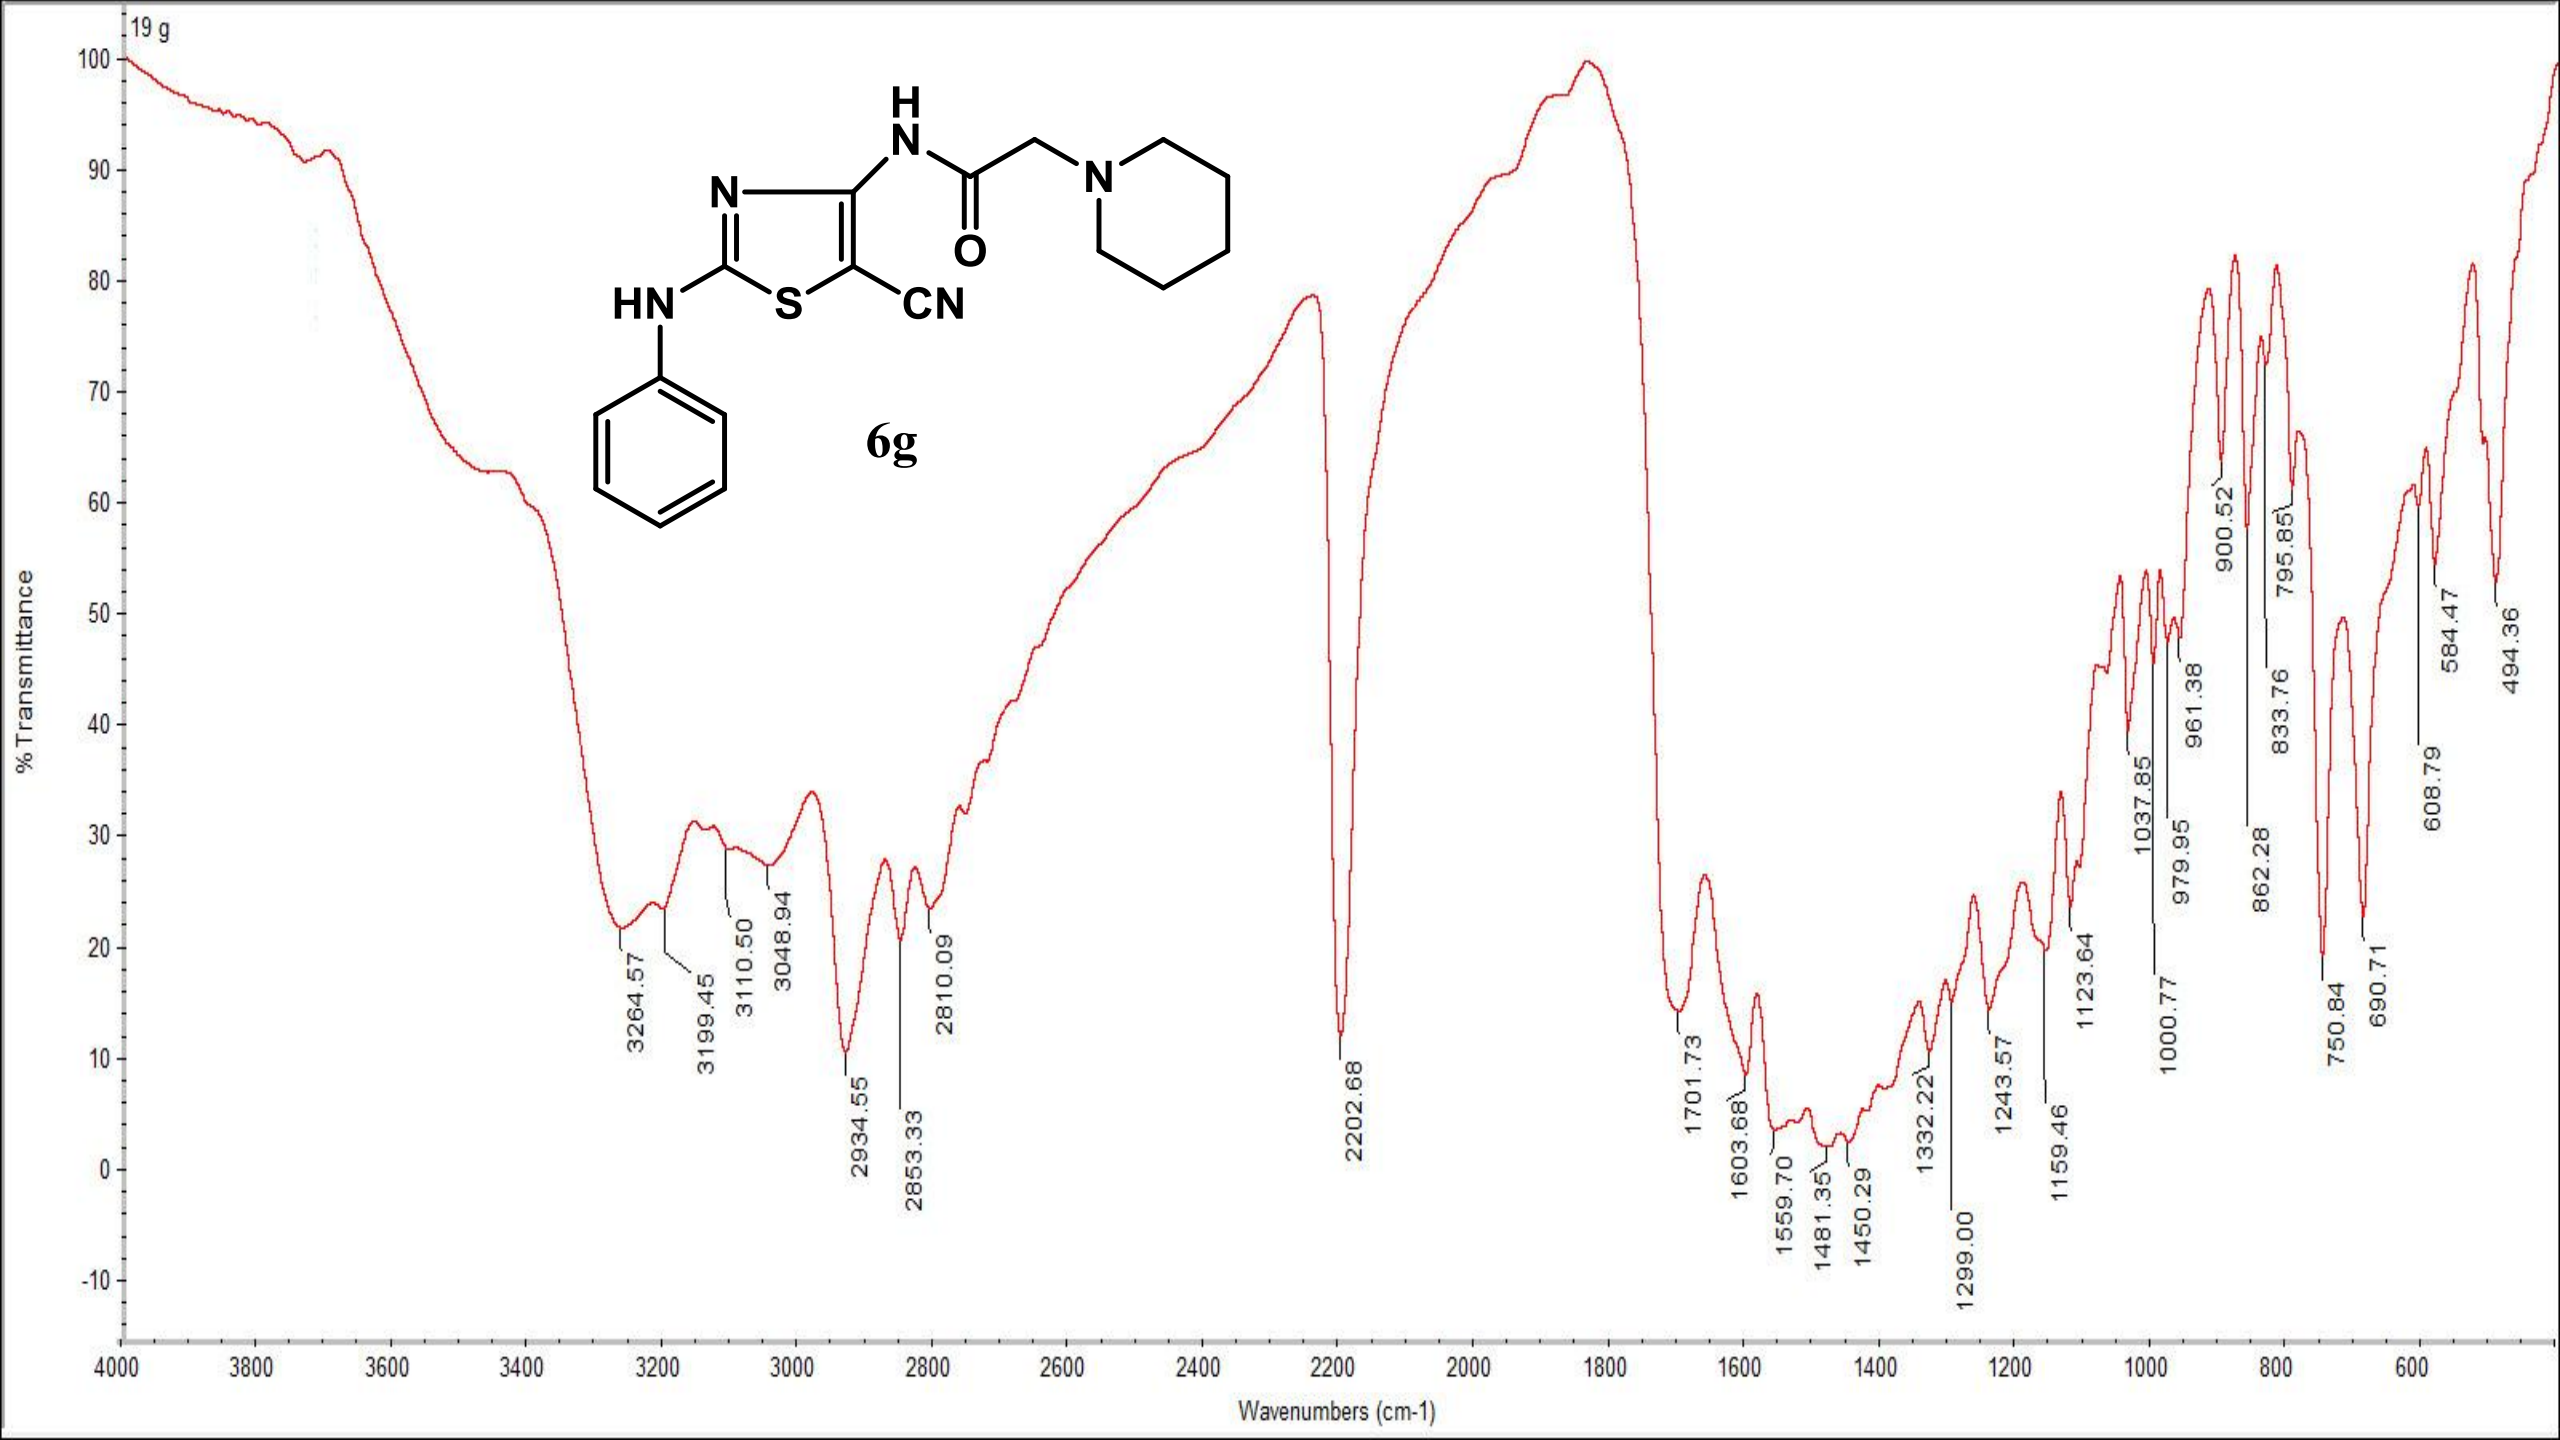

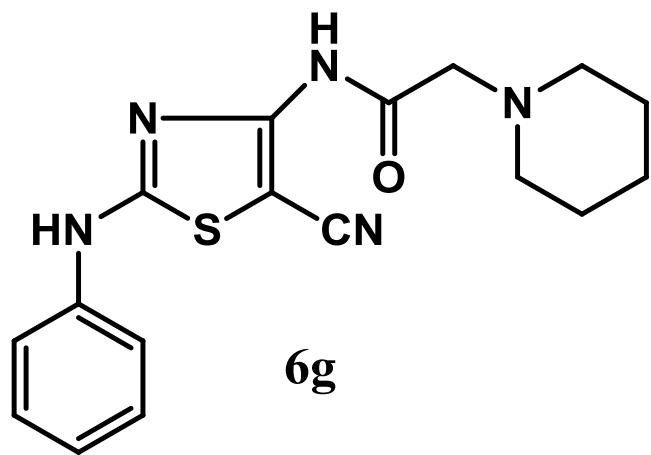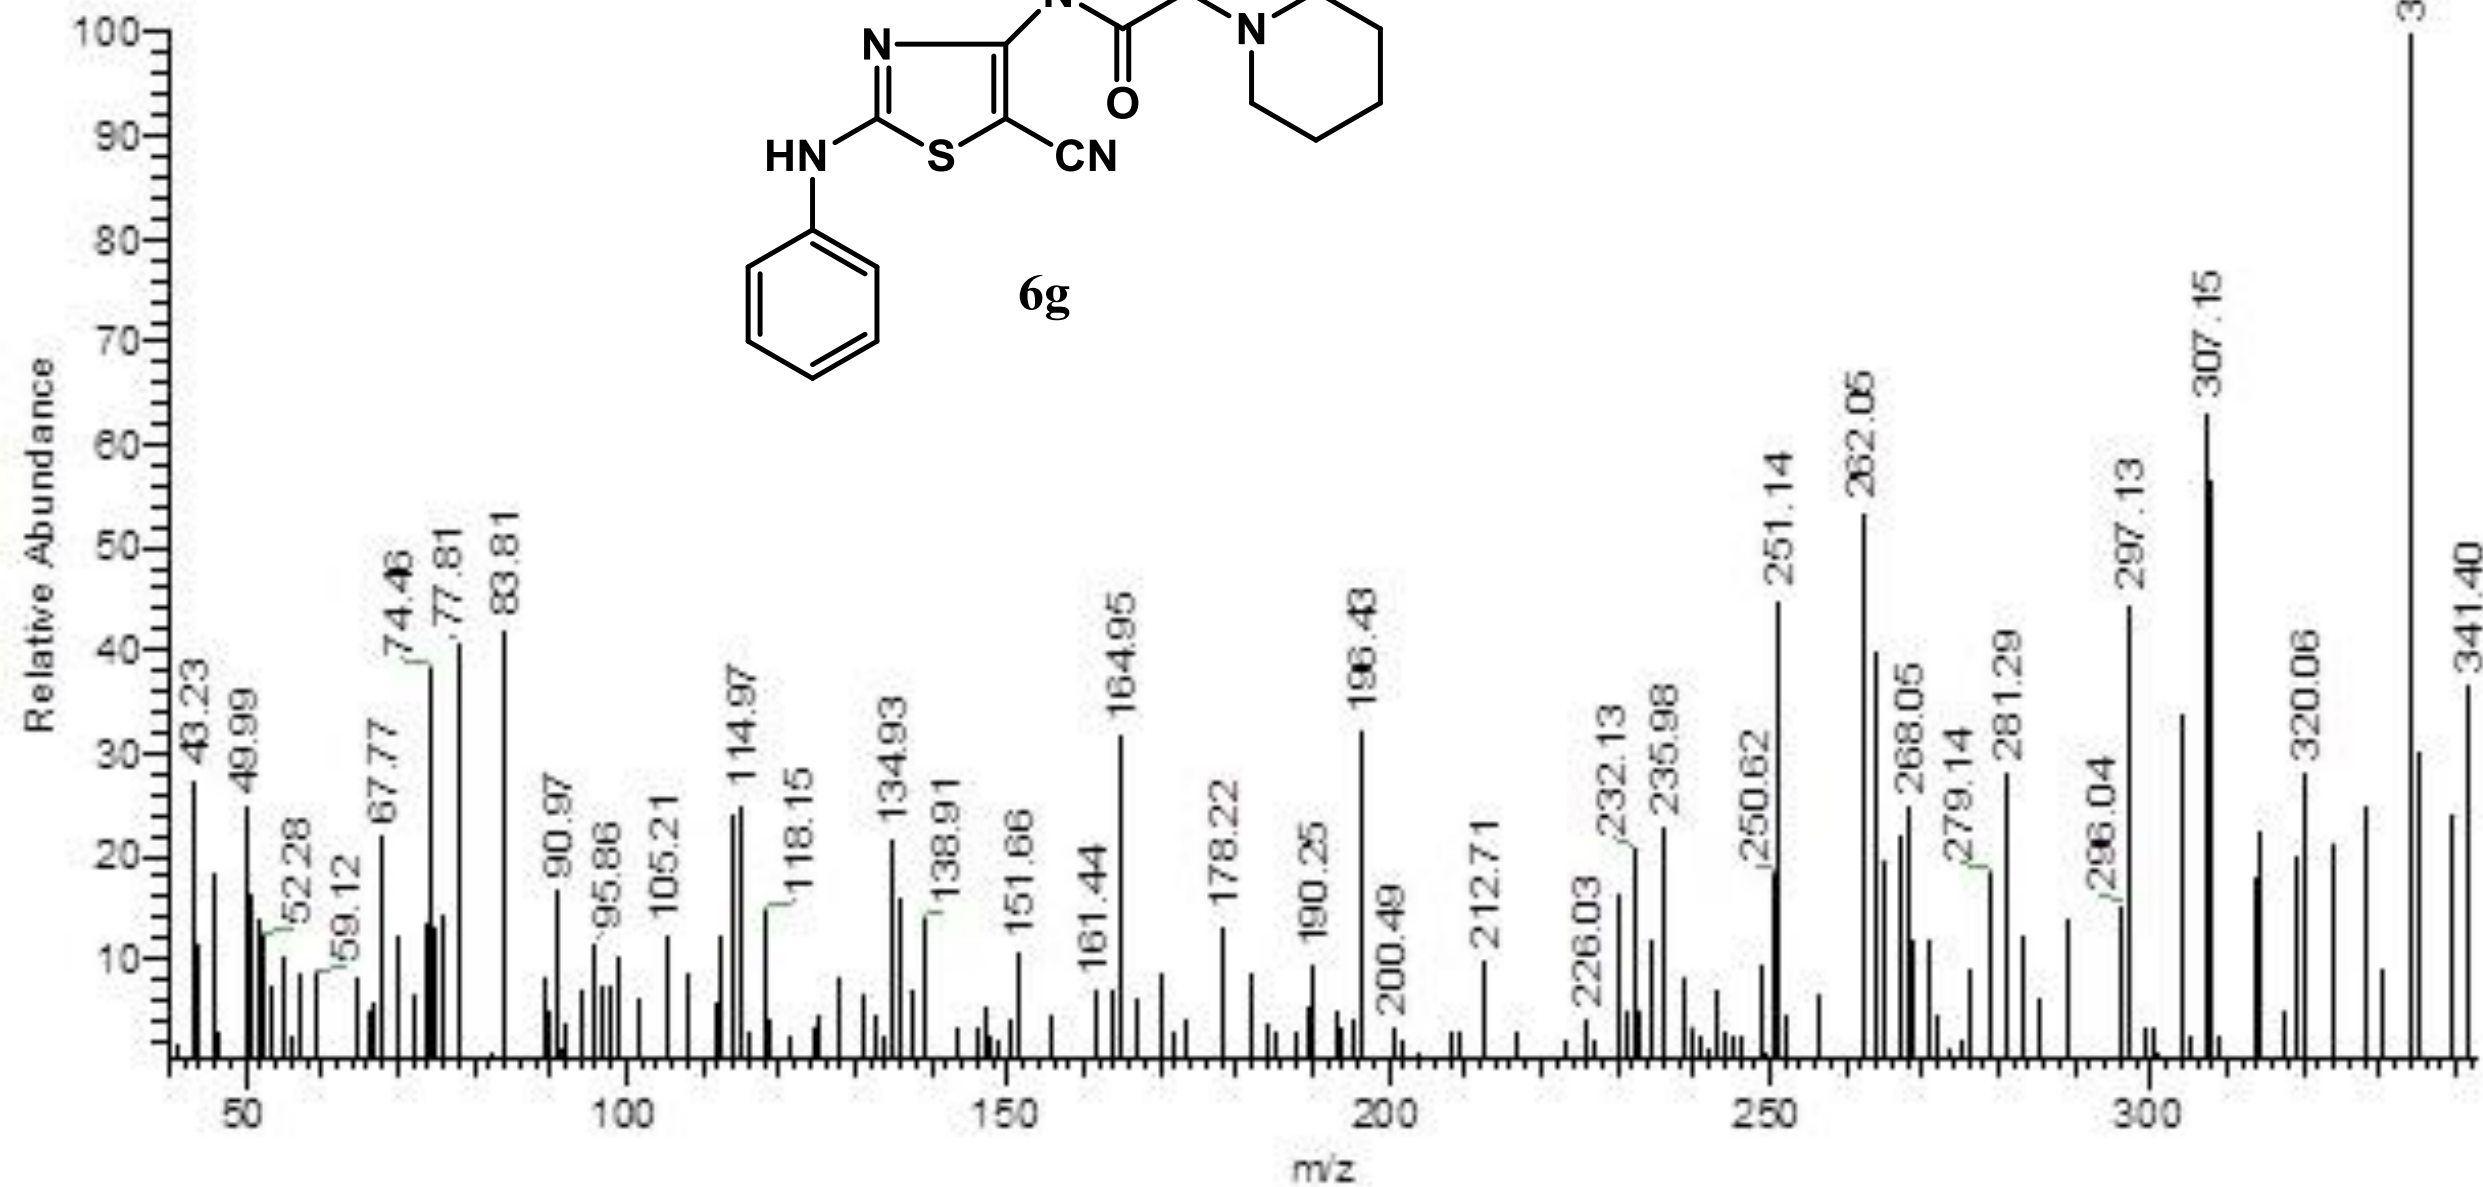

Alaa abdallah-6A-Hnmr-Es

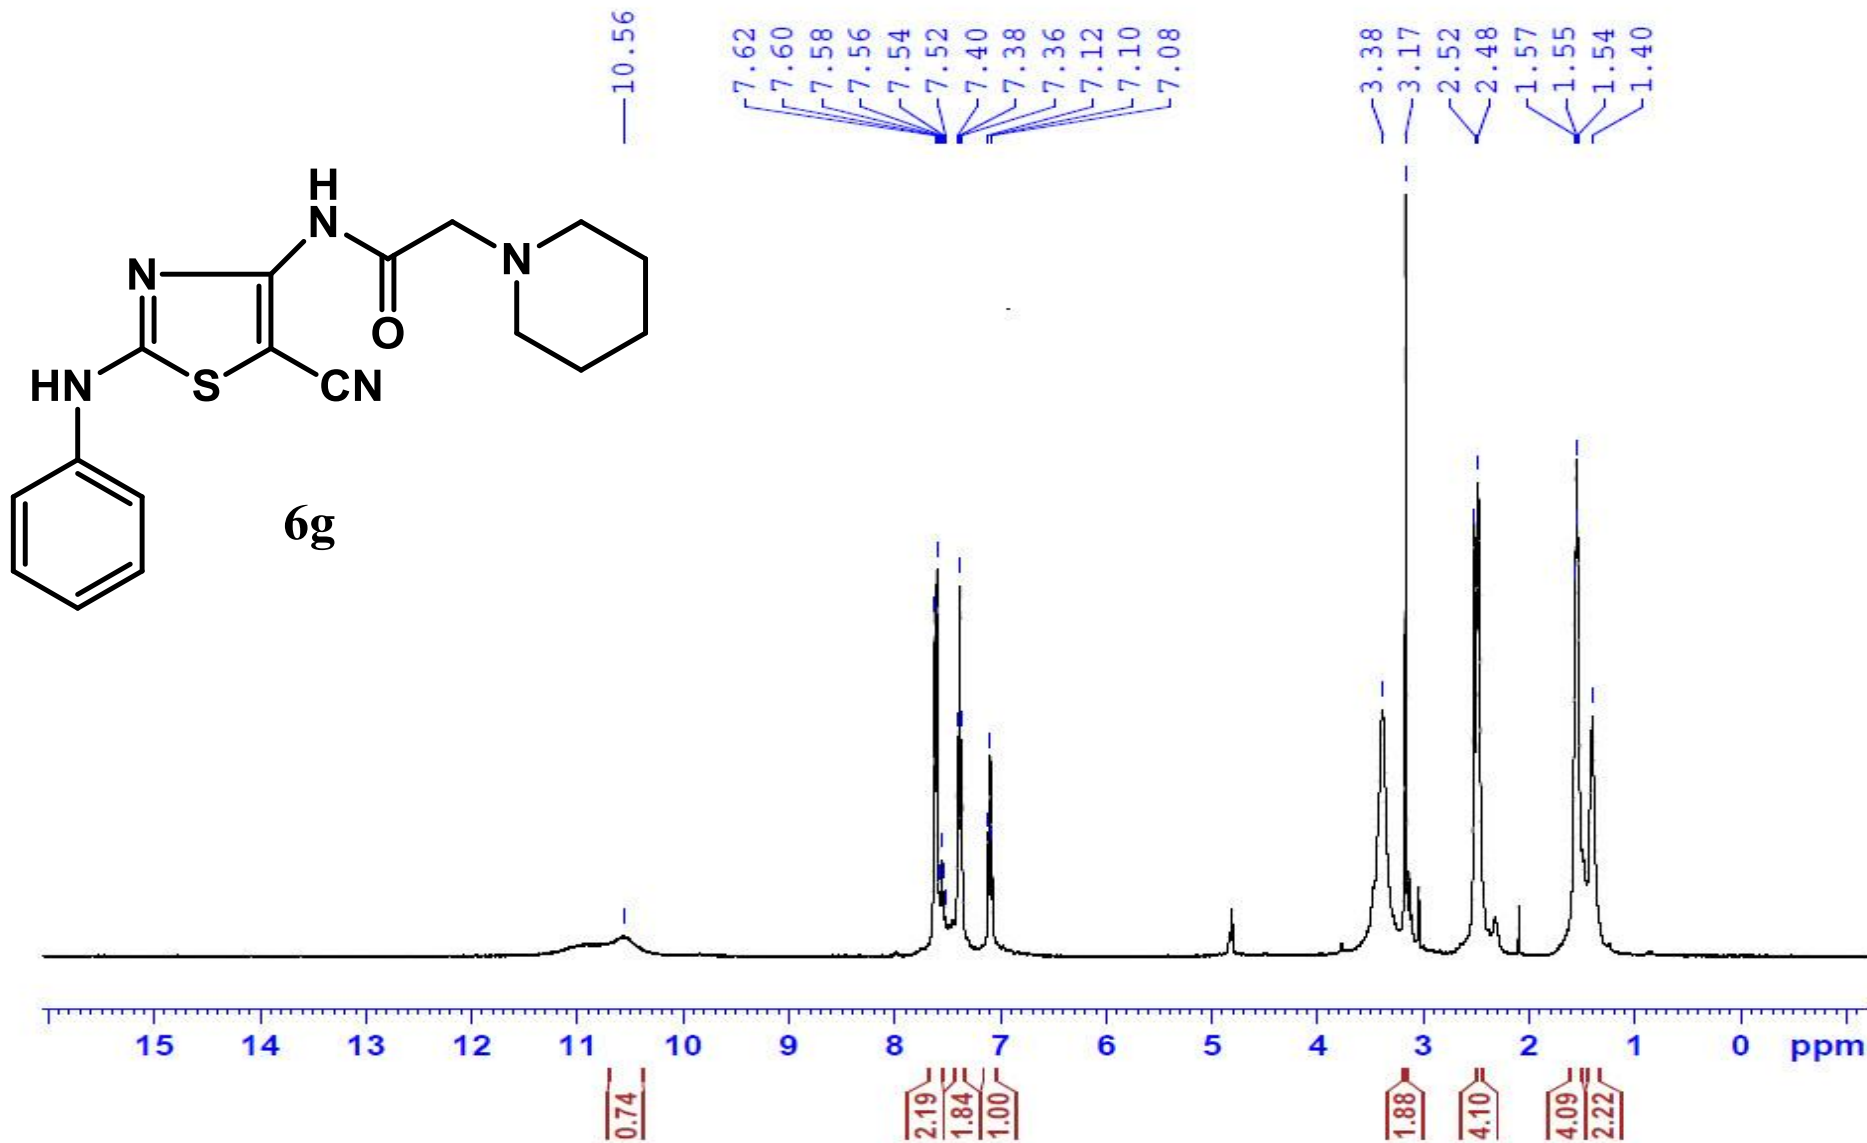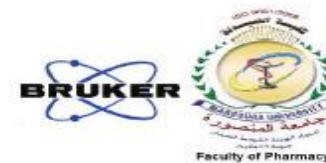

Current Data Parameters  
NAME Alaa abdallah-6A-Hr  
EXPNO 10  
PROCNO 1

F2 - Acquisition Parameters  
Date 20210211  
Time 7.55 h  
INSTRUM spect  
PROBHD Z108618\_0945 ( )  
PULPROG zg30  
TD 65536  
SOLVENT DMSO  
NS 16  
DS 2  
SWH 8012.820 Hz  
FIDRES 0.244532 Hz  
AQ 4.0894465 sec  
RG 99.3  
DW 62.400 usec  
DE 6.50 usec  
TE 293.0 K  
D1 1.0000000 sec  
TDO 1  
SFO1 400.2024712 MHz  
NUC1 1H  
P1 13.50 usec  
PLW1 13.00000000 W

F2 - Processing parameters  
SI 65536  
SF 400.2000000 MHz  
WDW EM  
SSB 0  
LB 0.30 Hz  
GB 0  
PC 1.00



Alaa abdallah-6A-Hnmr-Es

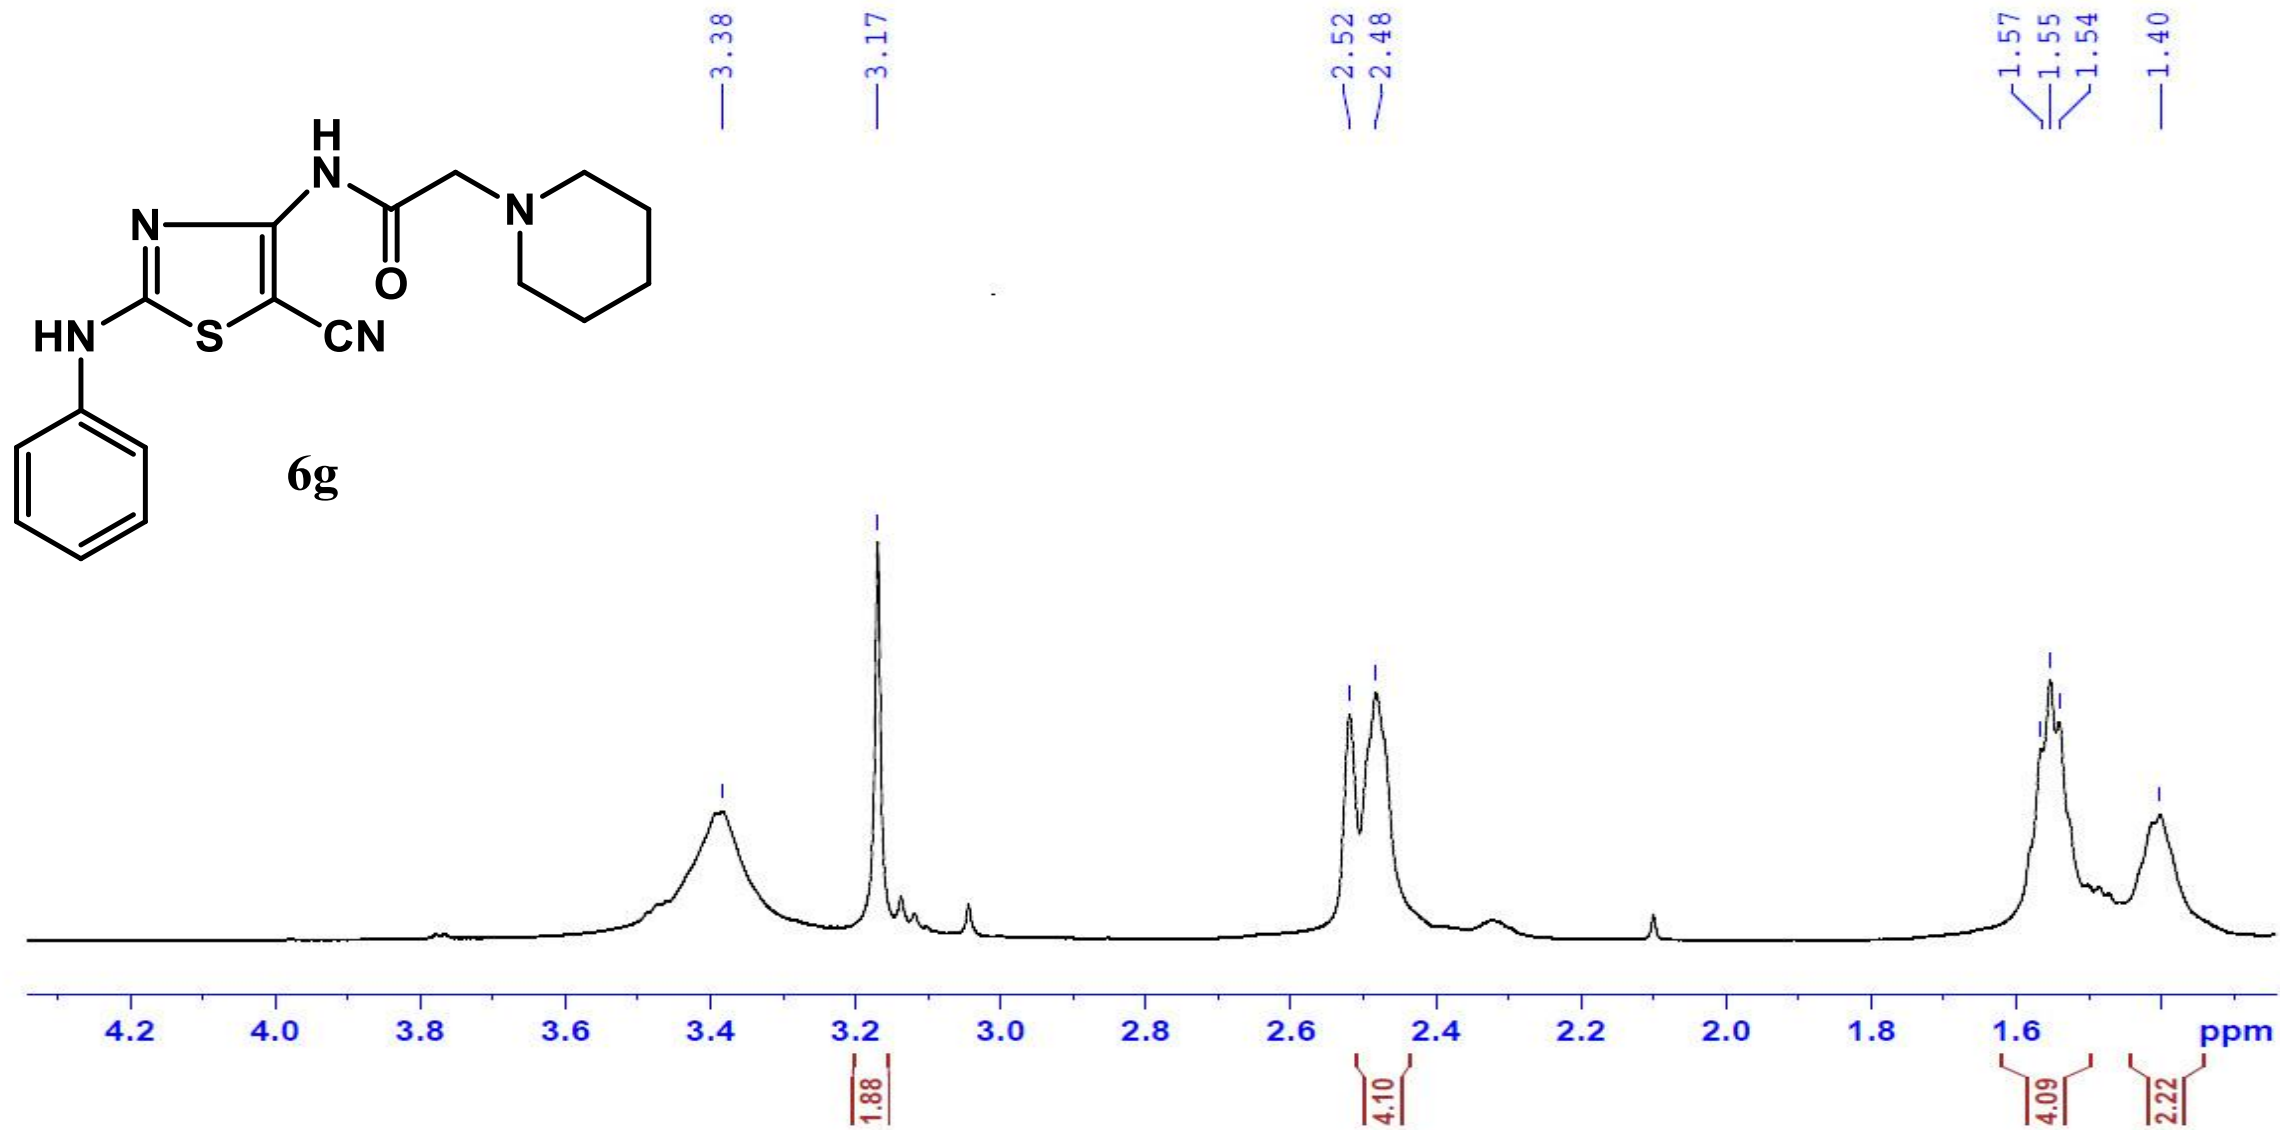

Alaa abdallah-6A-Hnmr-Es

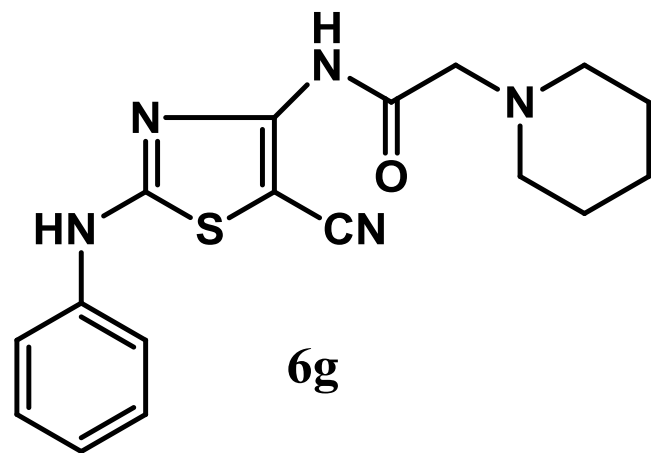

—7.62  
—7.60  
—7.58  
—7.56  
—7.54  
—7.52

—7.40  
—7.38  
—7.36

—7.12  
—7.10  
—7.08

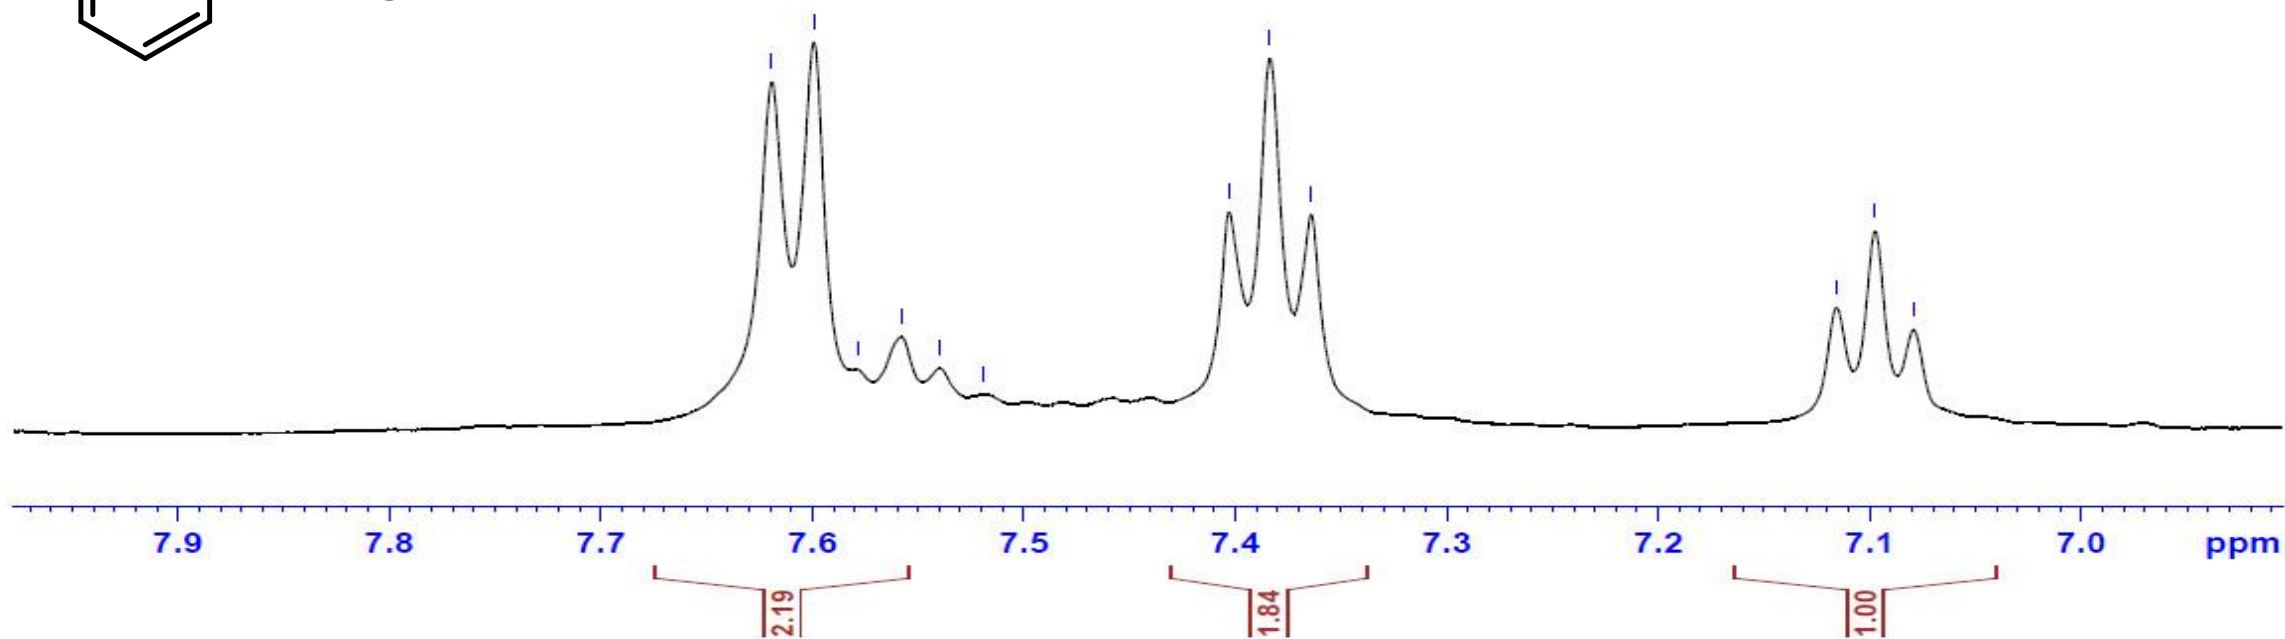

alaa abdallah 6A -M c13

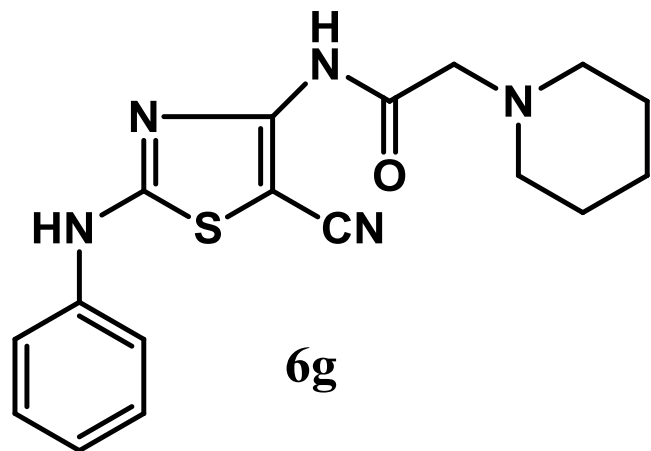

168.64  
164.50  
151.88  
139.97  
129.71  
123.79  
118.84  
113.50  
77.39  
61.86  
54.32  
40.58  
40.37  
40.16  
39.95  
39.74  
39.53  
39.32  
25.99  
23.98

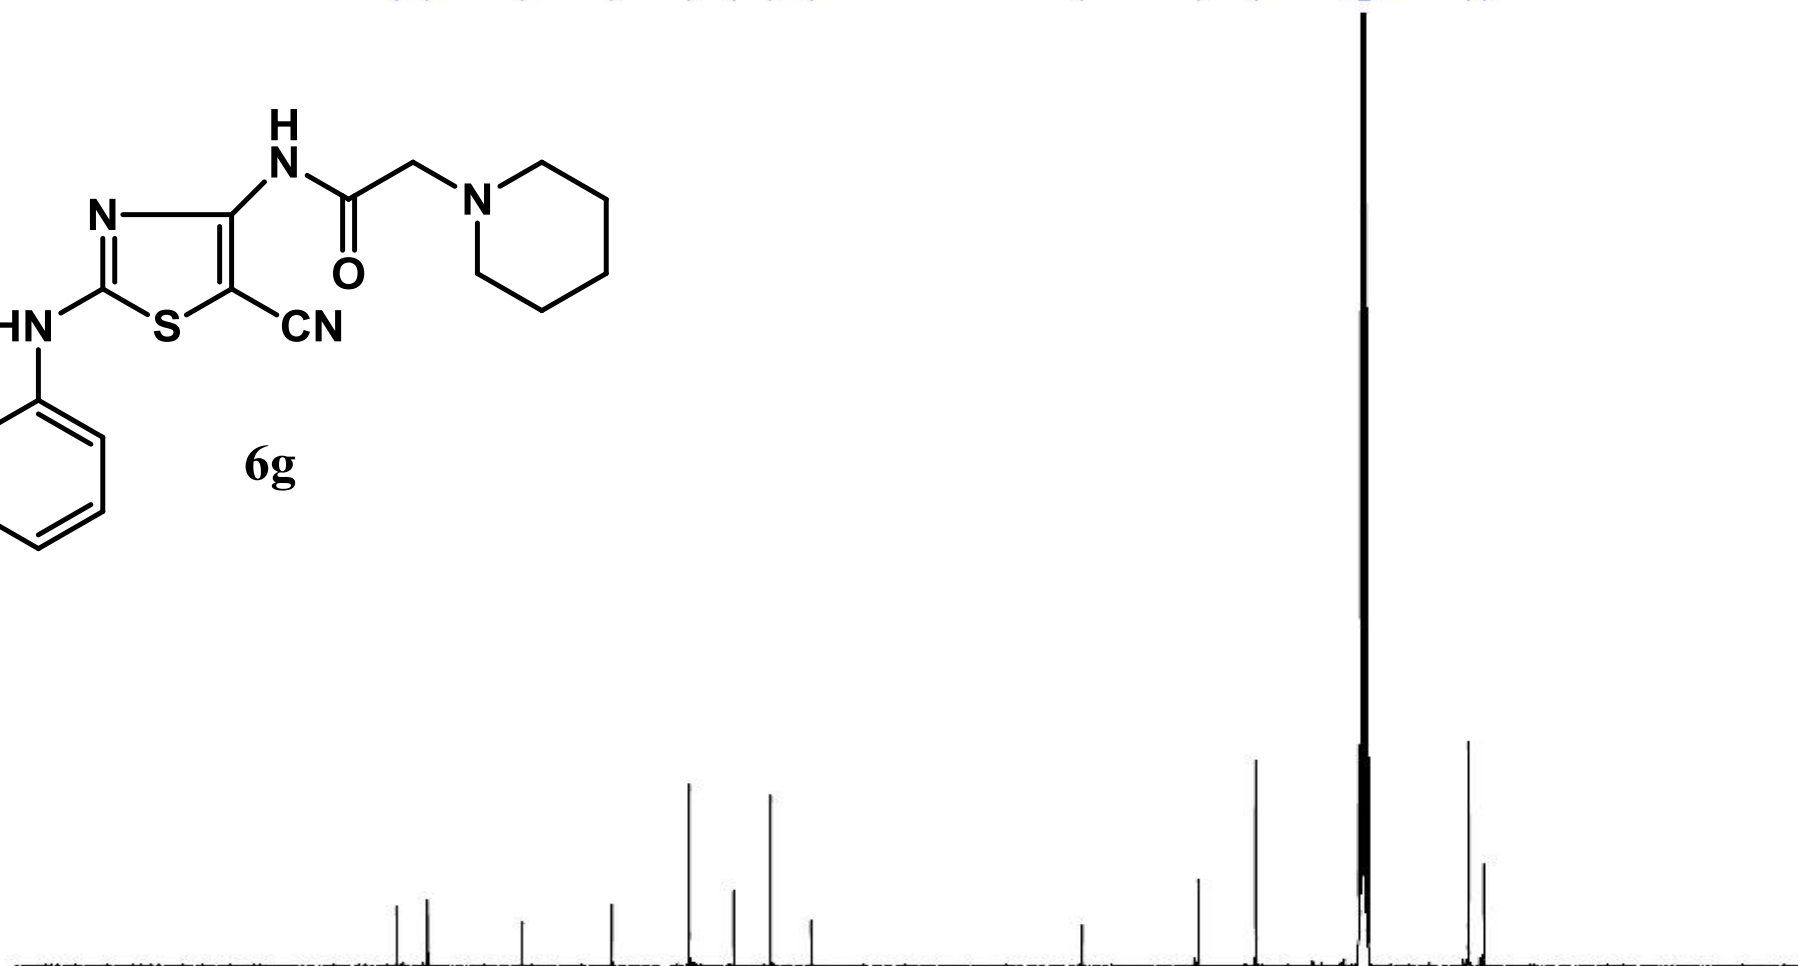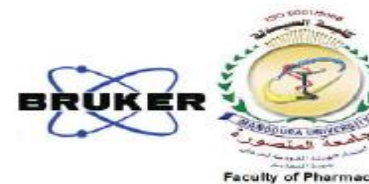

Current Data Parameters  
NAME alaa abdallah 6A -M c13  
EXPNO 10  
PROCNO 1

F2 - Acquisition Parameters  
Date\_ 20210302  
Time 3.27 h  
INSTRUM spect  
PROBHD Z108618\_0945 ( )  
PULPROG zgpg30  
TD 65536  
SOLVENT DMSO  
NS 2100  
DS 4  
SWH 24038.461 Hz  
FIDRES 0.733596 Hz  
AQ 1.3631488 sec  
RG 197.77  
DW 20.800 usec  
DE 6.50 usec  
TE 293.8 K  
D1 2.00000000 sec  
D11 0.03000000 sec  
TD0 1  
SFO1 100.6404331 MHz  
NUC1 13C  
P1 10.00 usec  
PLW1 47.00000000 W  
SFO2 400.2016008 MHz  
NUC2 1H  
CPDPRG2 waltz16  
PCPD2 90.00 usec  
PLW2 13.00000000 W  
PLW12 0.29249999 W  
PLW13 0.14713000 W

F2 - Processing parameters  
SI 32768  
SF 100.6303700 MHz  
WDW EM  
SSB 0  
LB 1.00 Hz  
GB 0  
PC 1.40



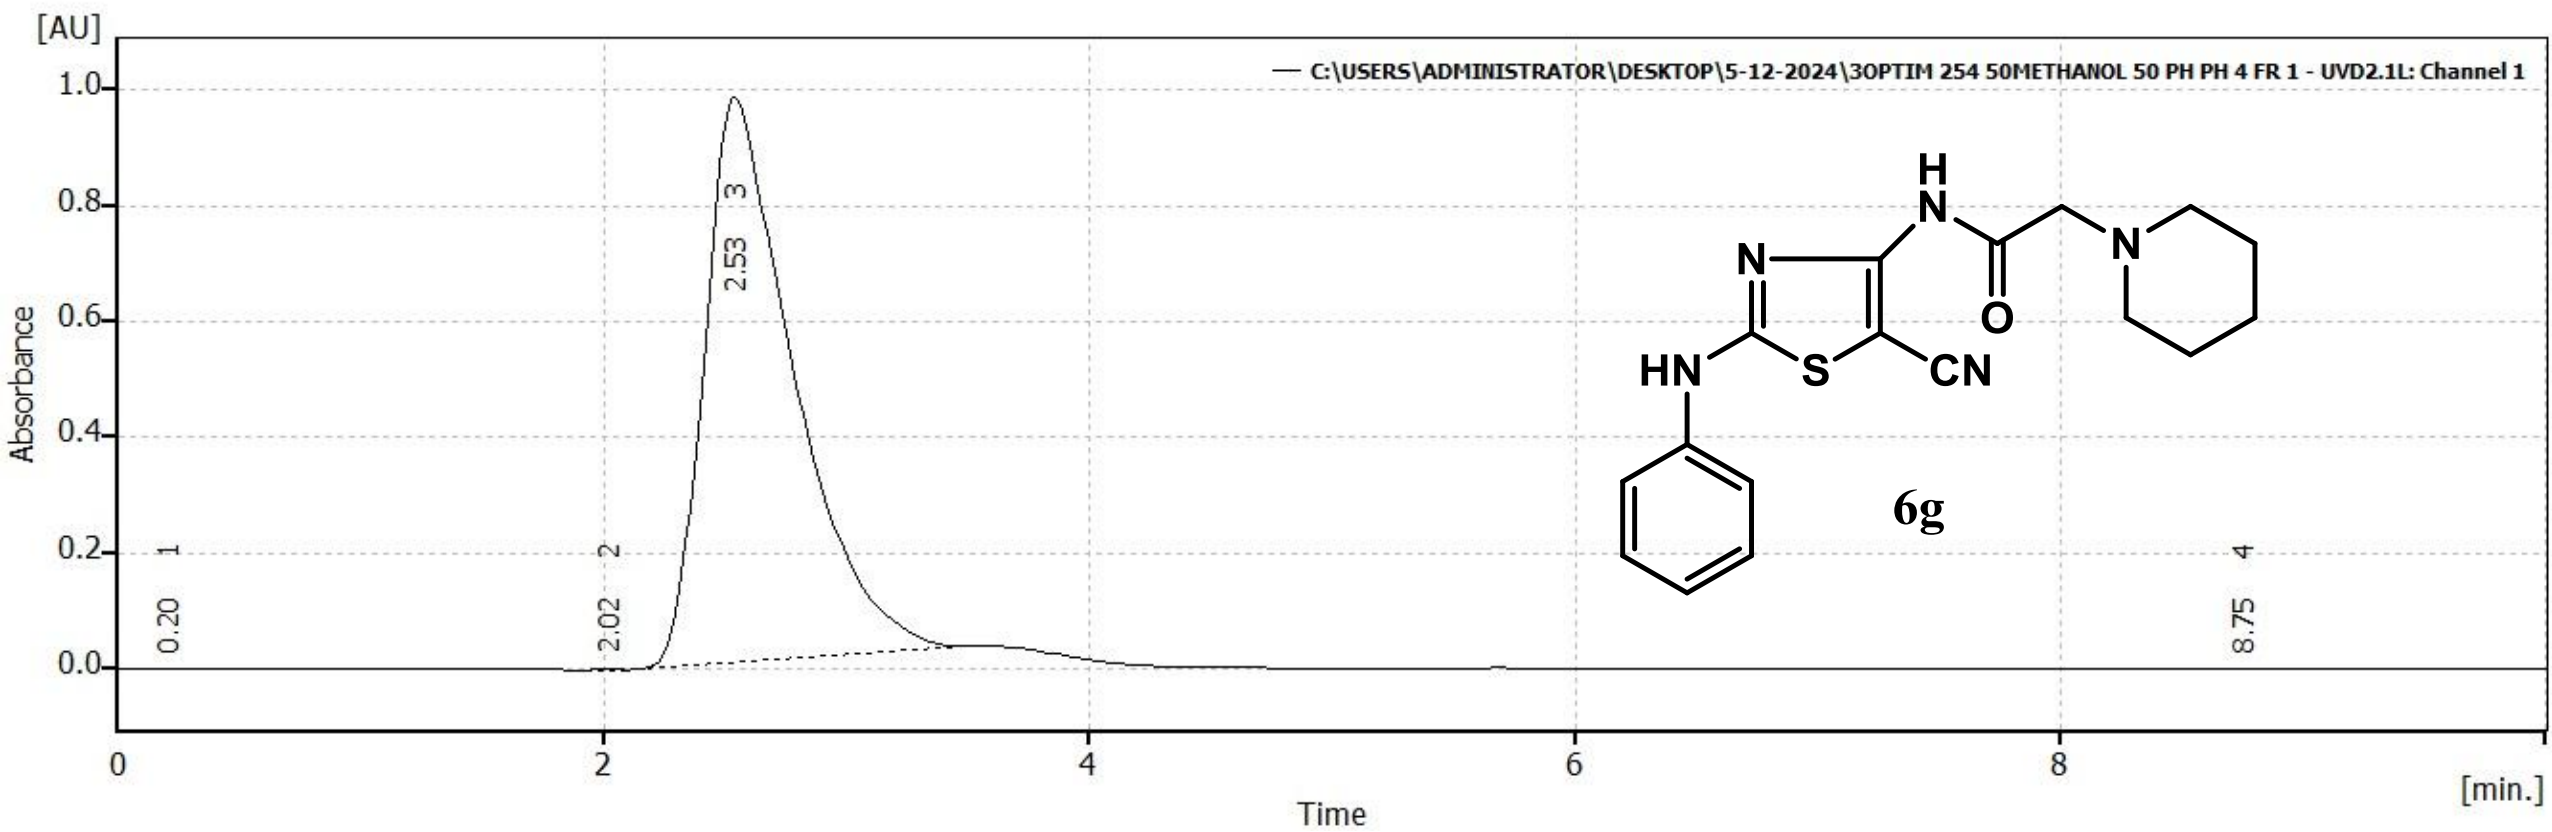

Alaa abdallah-VII-Hnmr-ES

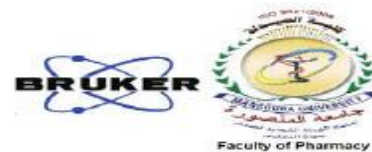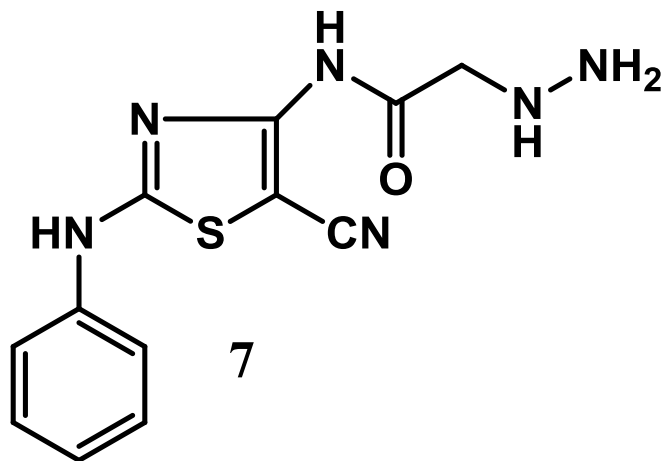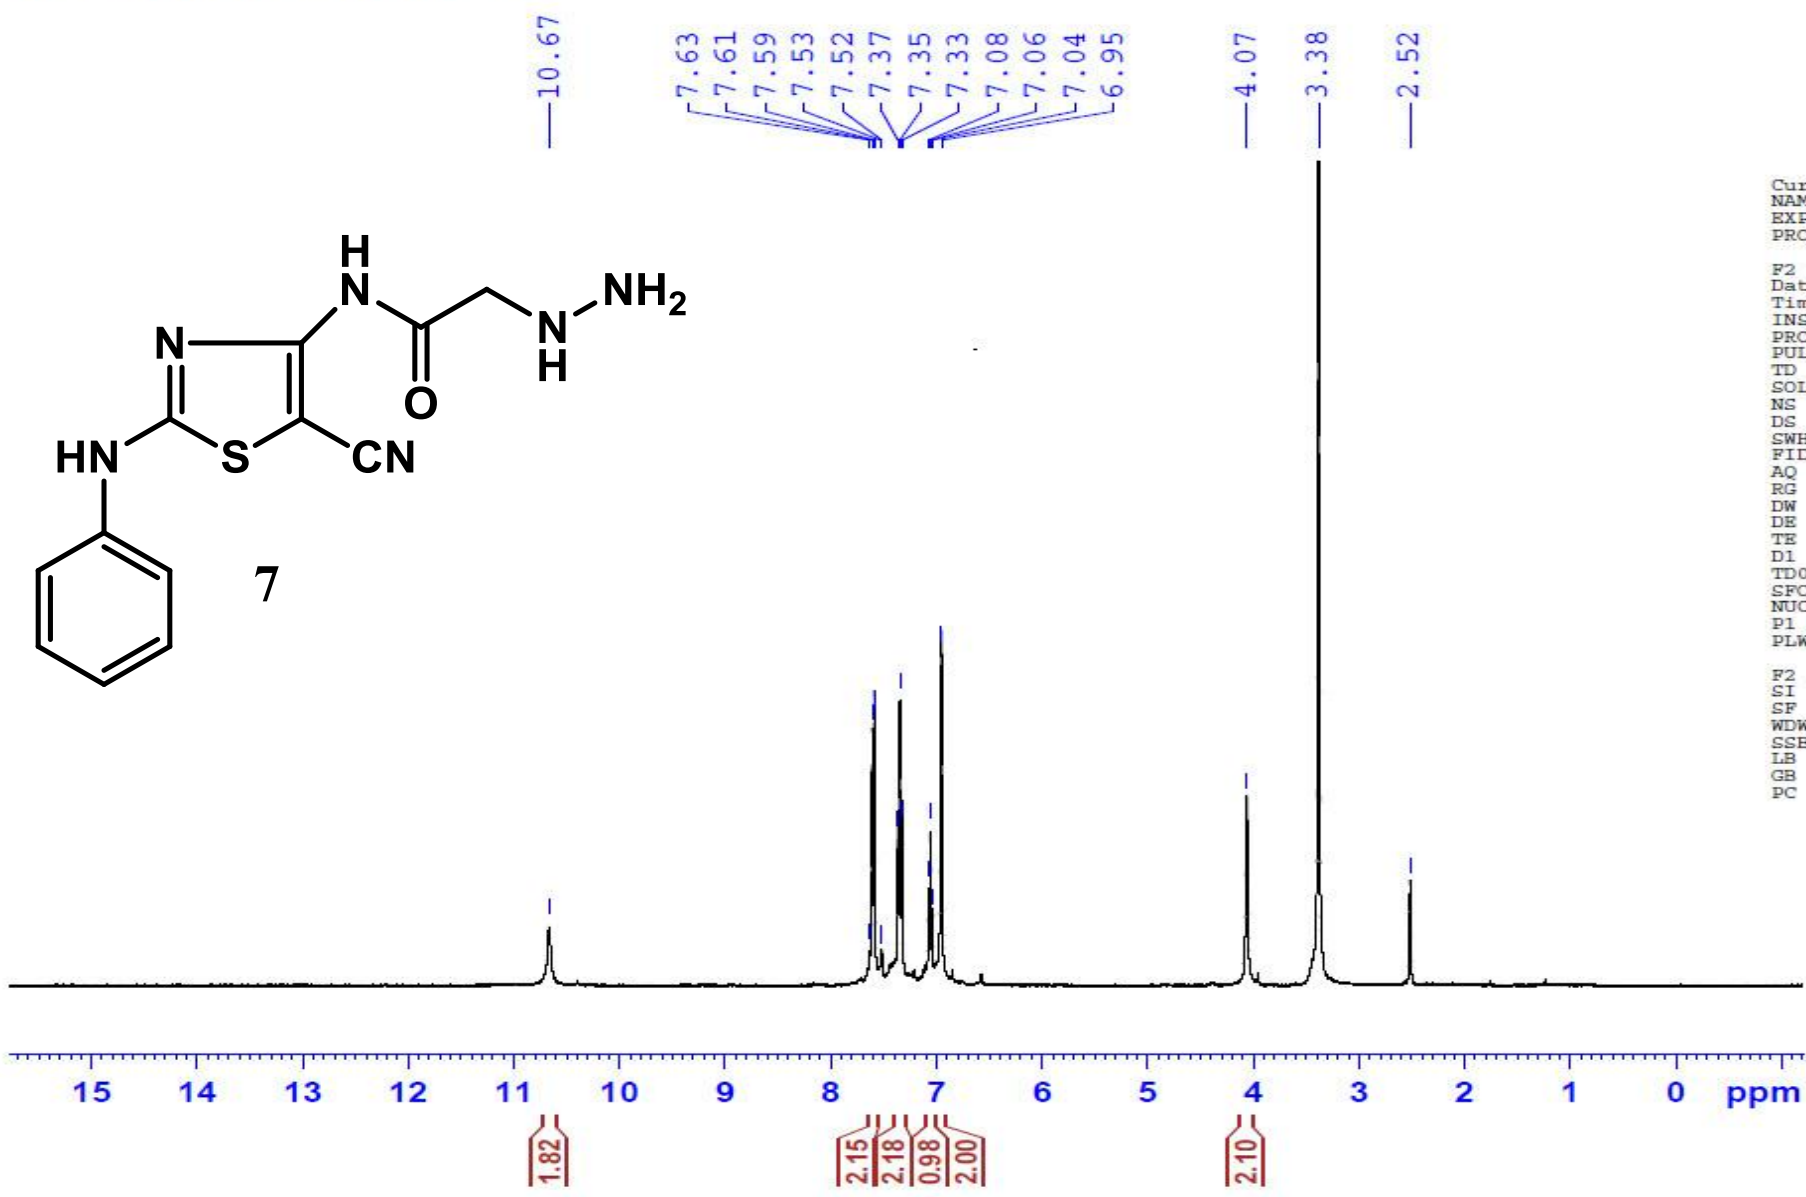

Current Data Parameters  
NAME Alaa abdallah-VII-Hnmr-ES  
EXPNO 10  
PROCNO 1

F2 - Acquisition Parameters  
Date\_ 20210914  
Time 10.53 h  
INSTRUM spect  
PROBHD Z108618\_0945 (   
PULPROG zg30  
TD 65536  
SOLVENT DMSO  
NS 16  
DS 2  
SWH 8012.820 Hz  
FIDRES 0.244532 Hz  
AQ 4.0894465 sec  
RG 120.93  
DW 62.400 usec  
DE 6.50 usec  
TE 295.5 K  
D1 1.00000000 sec  
TD0 1  
SFO1 400.2024712 MHz  
NUC1 1H  
P1 13.50 usec  
PLW1 13.00000000 W

F2 - Processing parameters  
SI 65536  
SF 400.2000000 MHz  
WDW EM  
SSB 0  
LB 0.30 Hz  
GB 0  
PC 1.00

Alaa abdallah-VII-Hnmr-ES

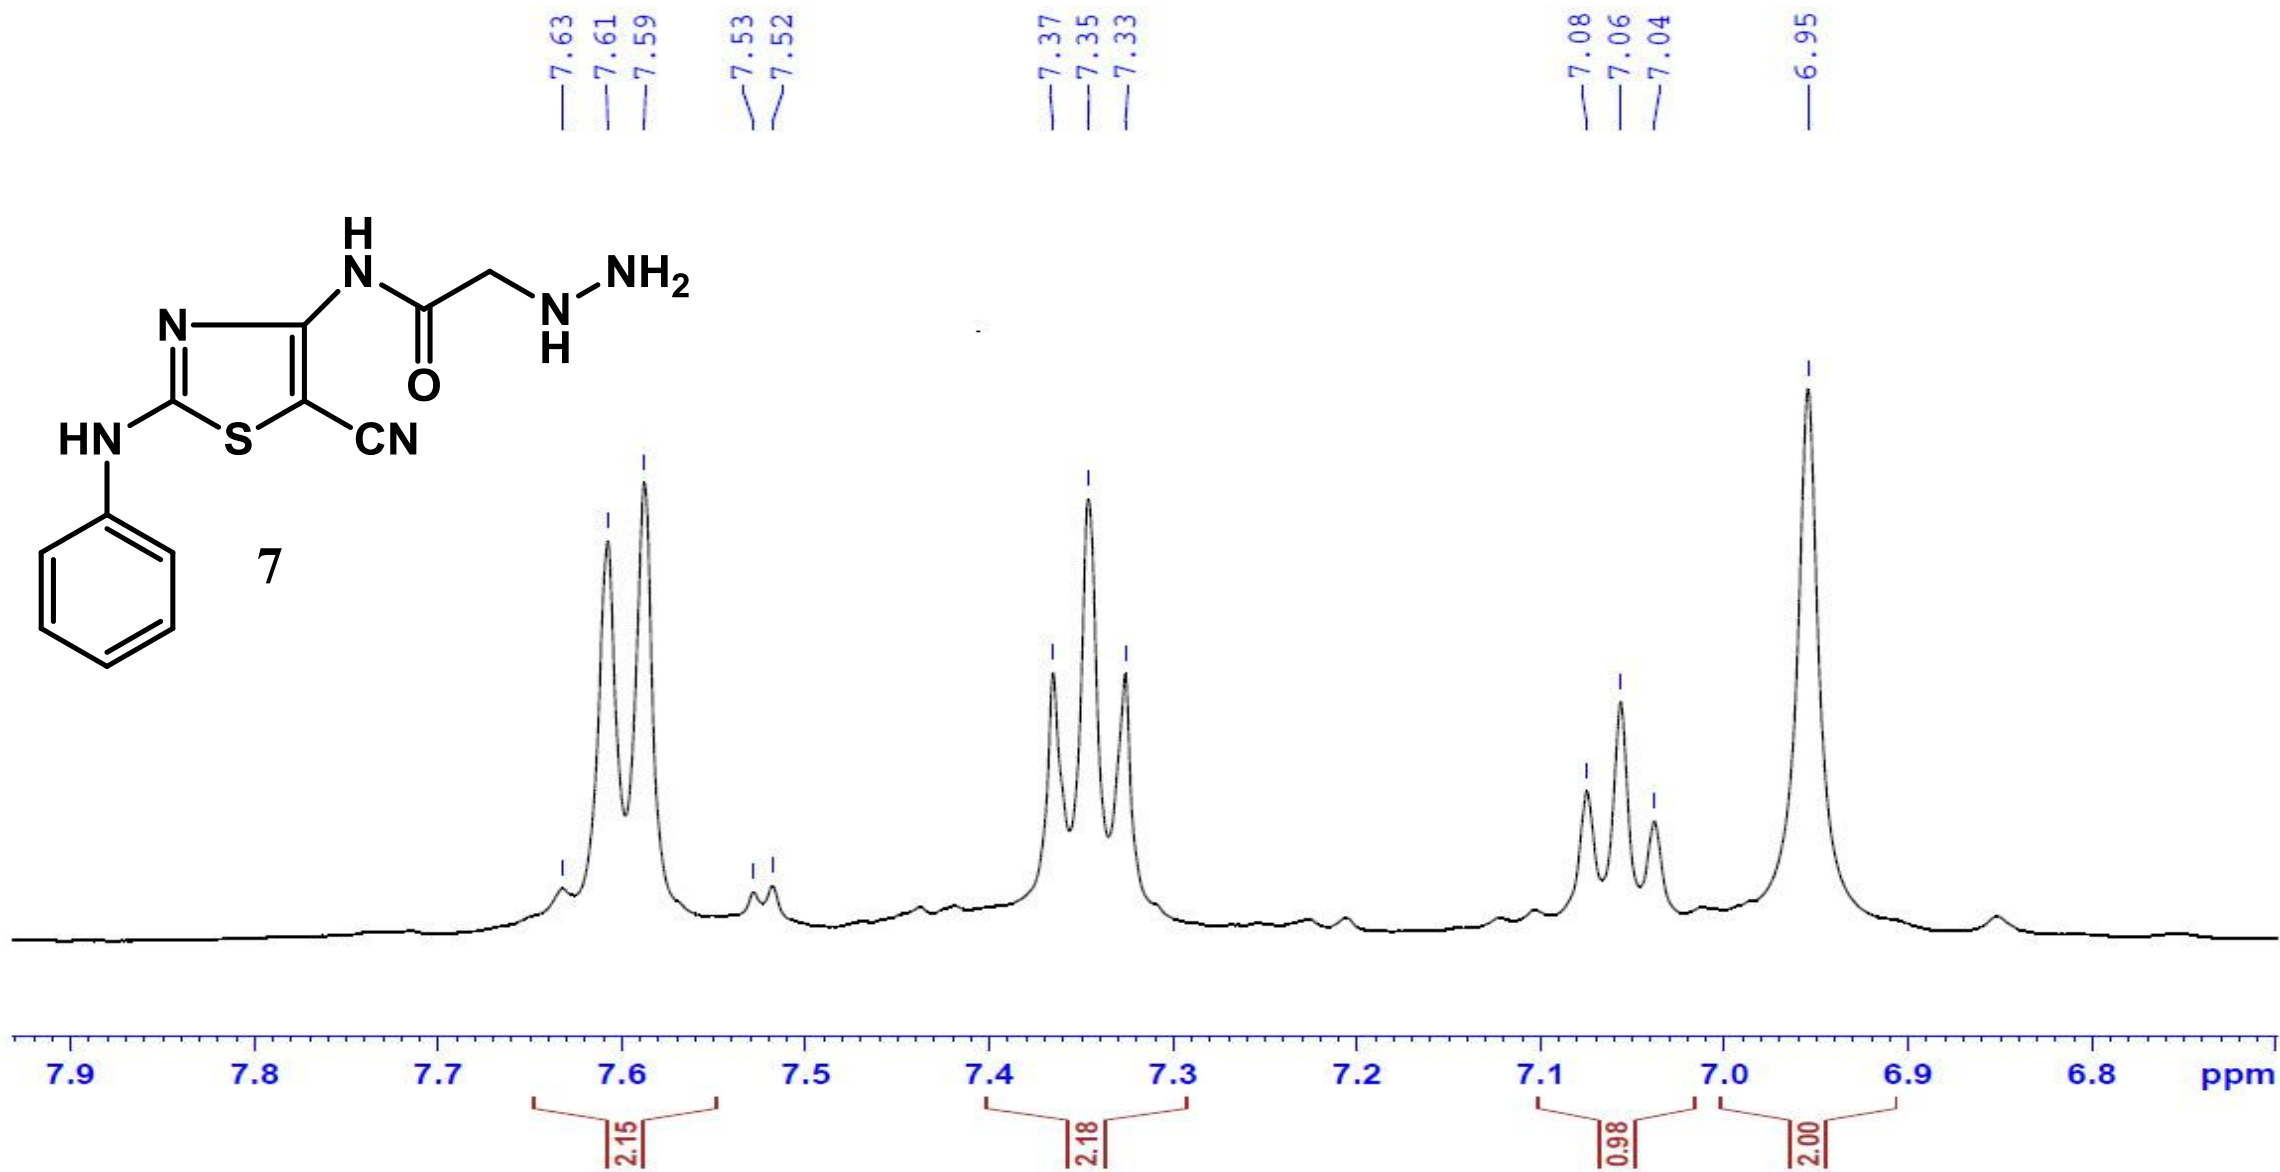

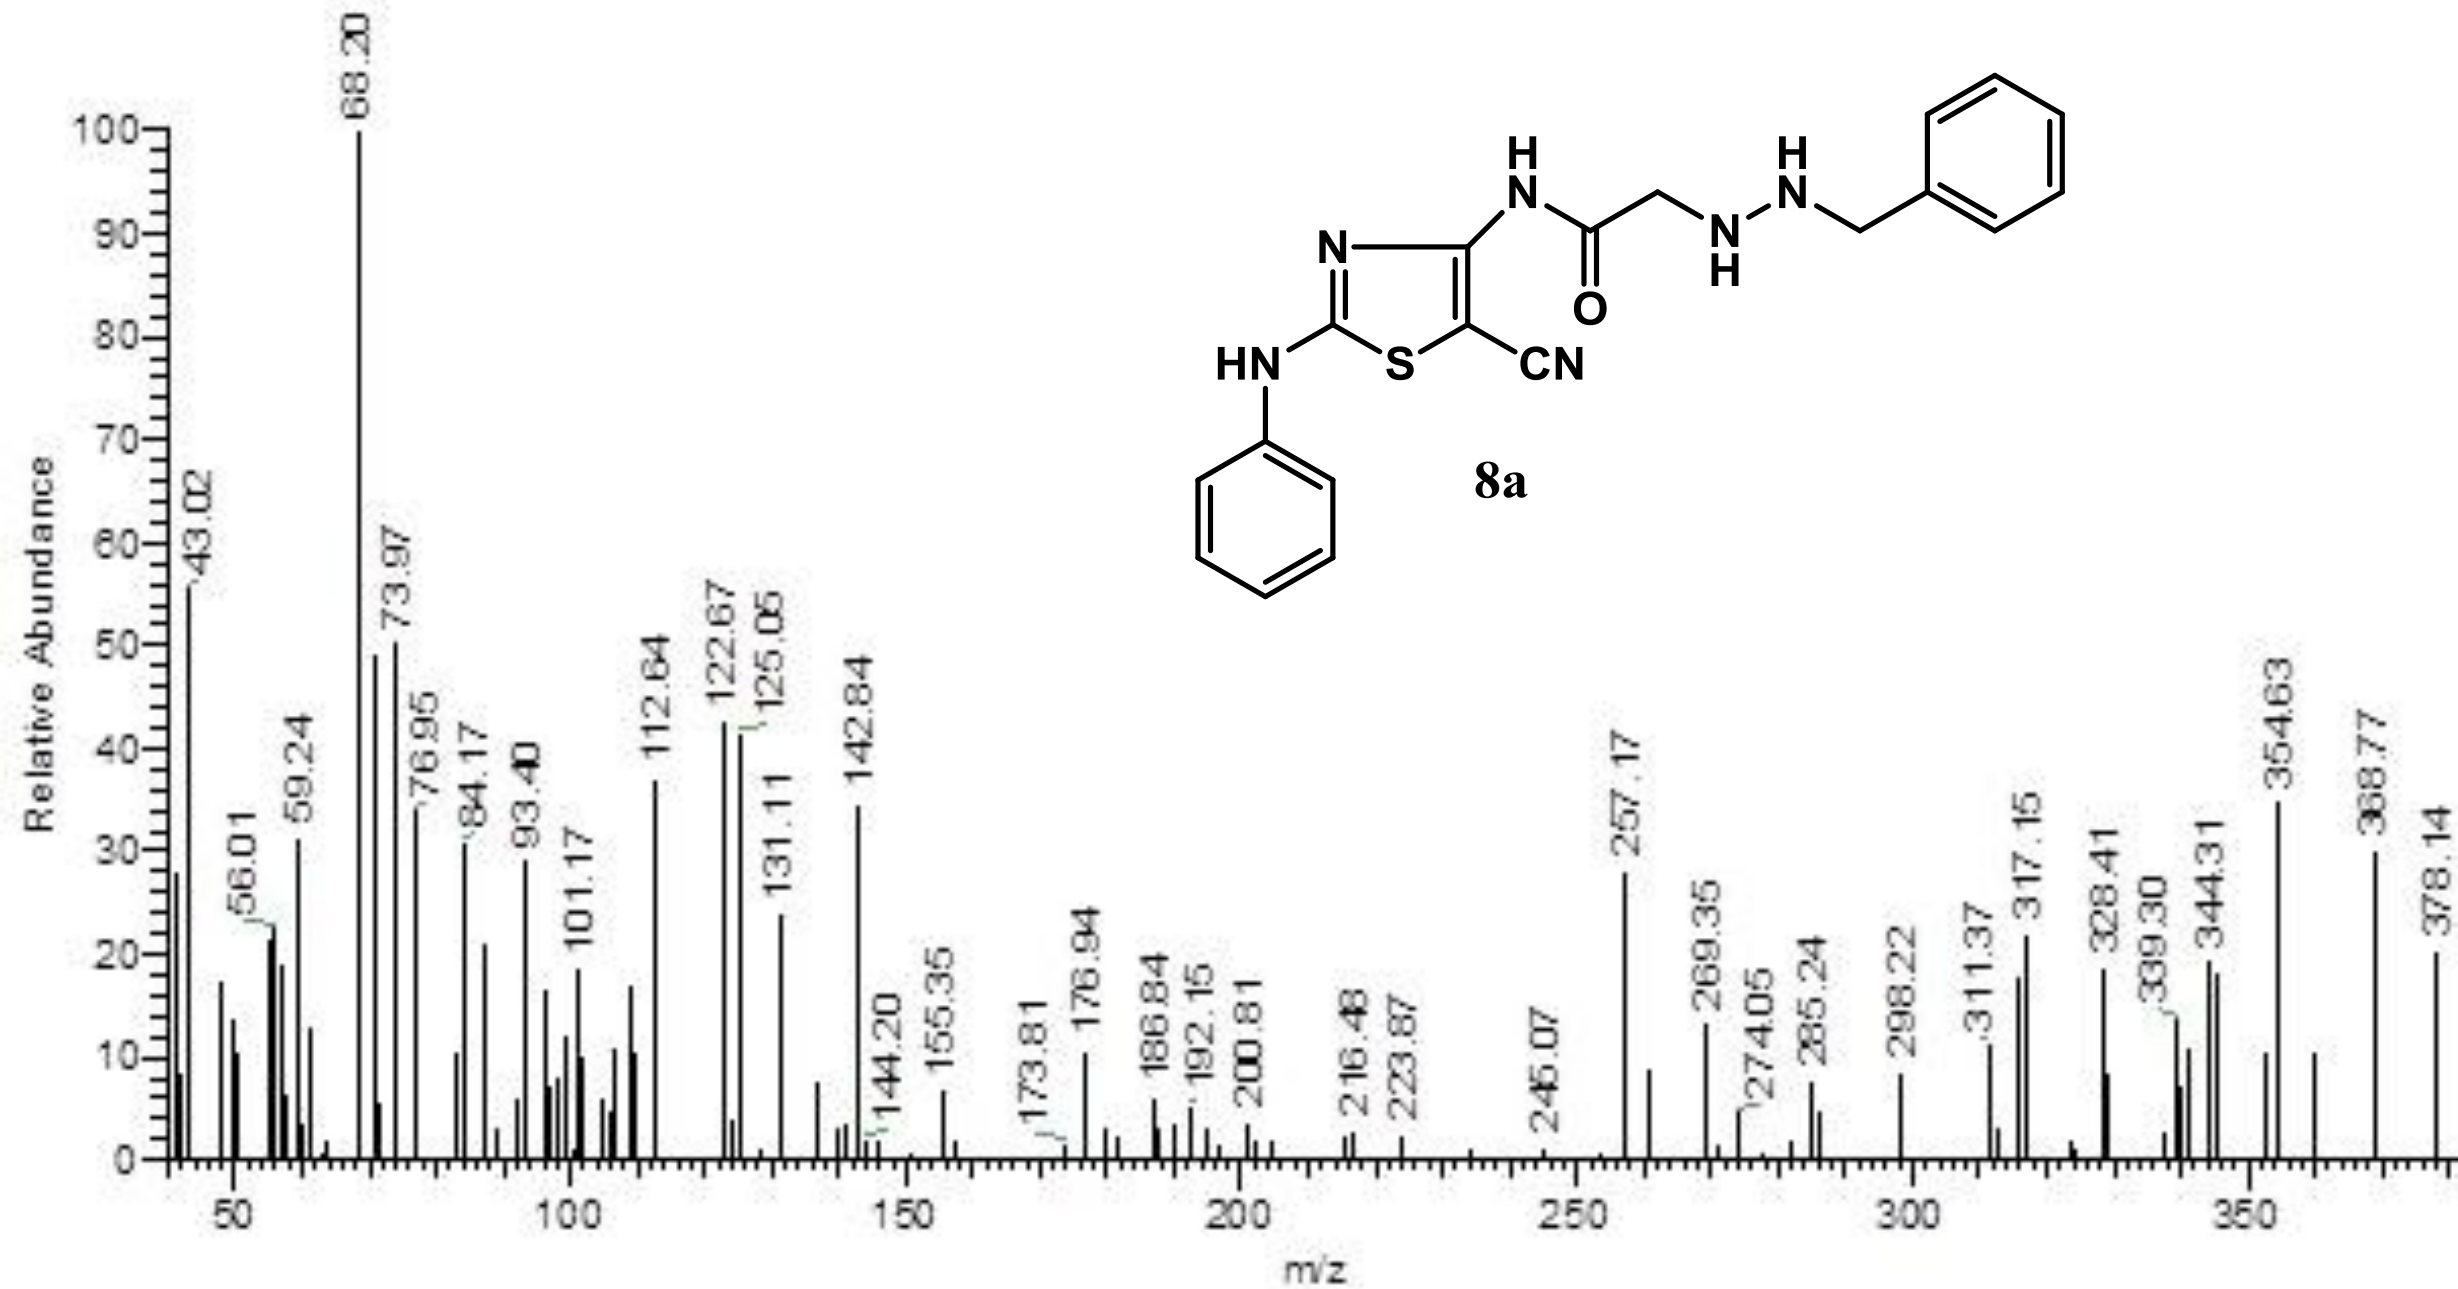

Alaa abdallah-VI-Hnmr-ES

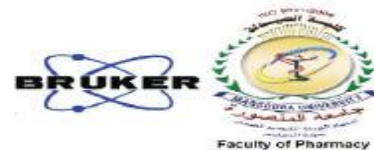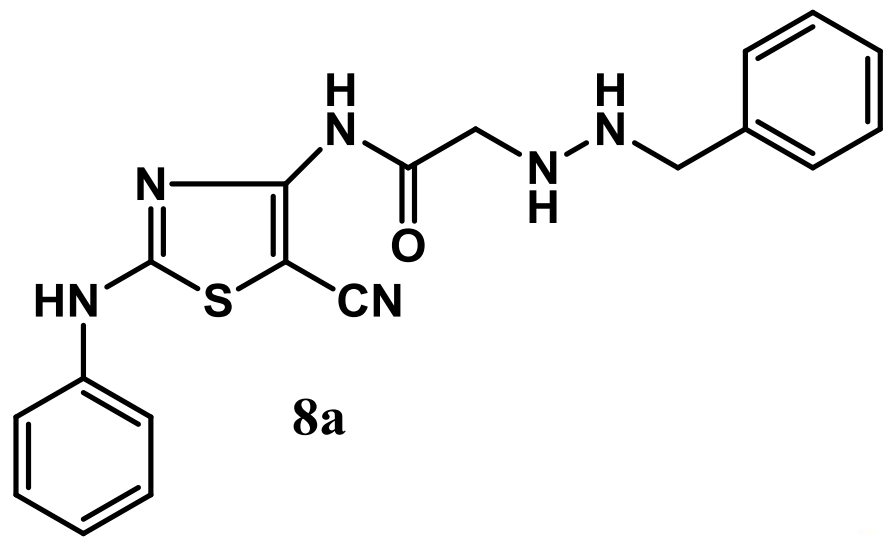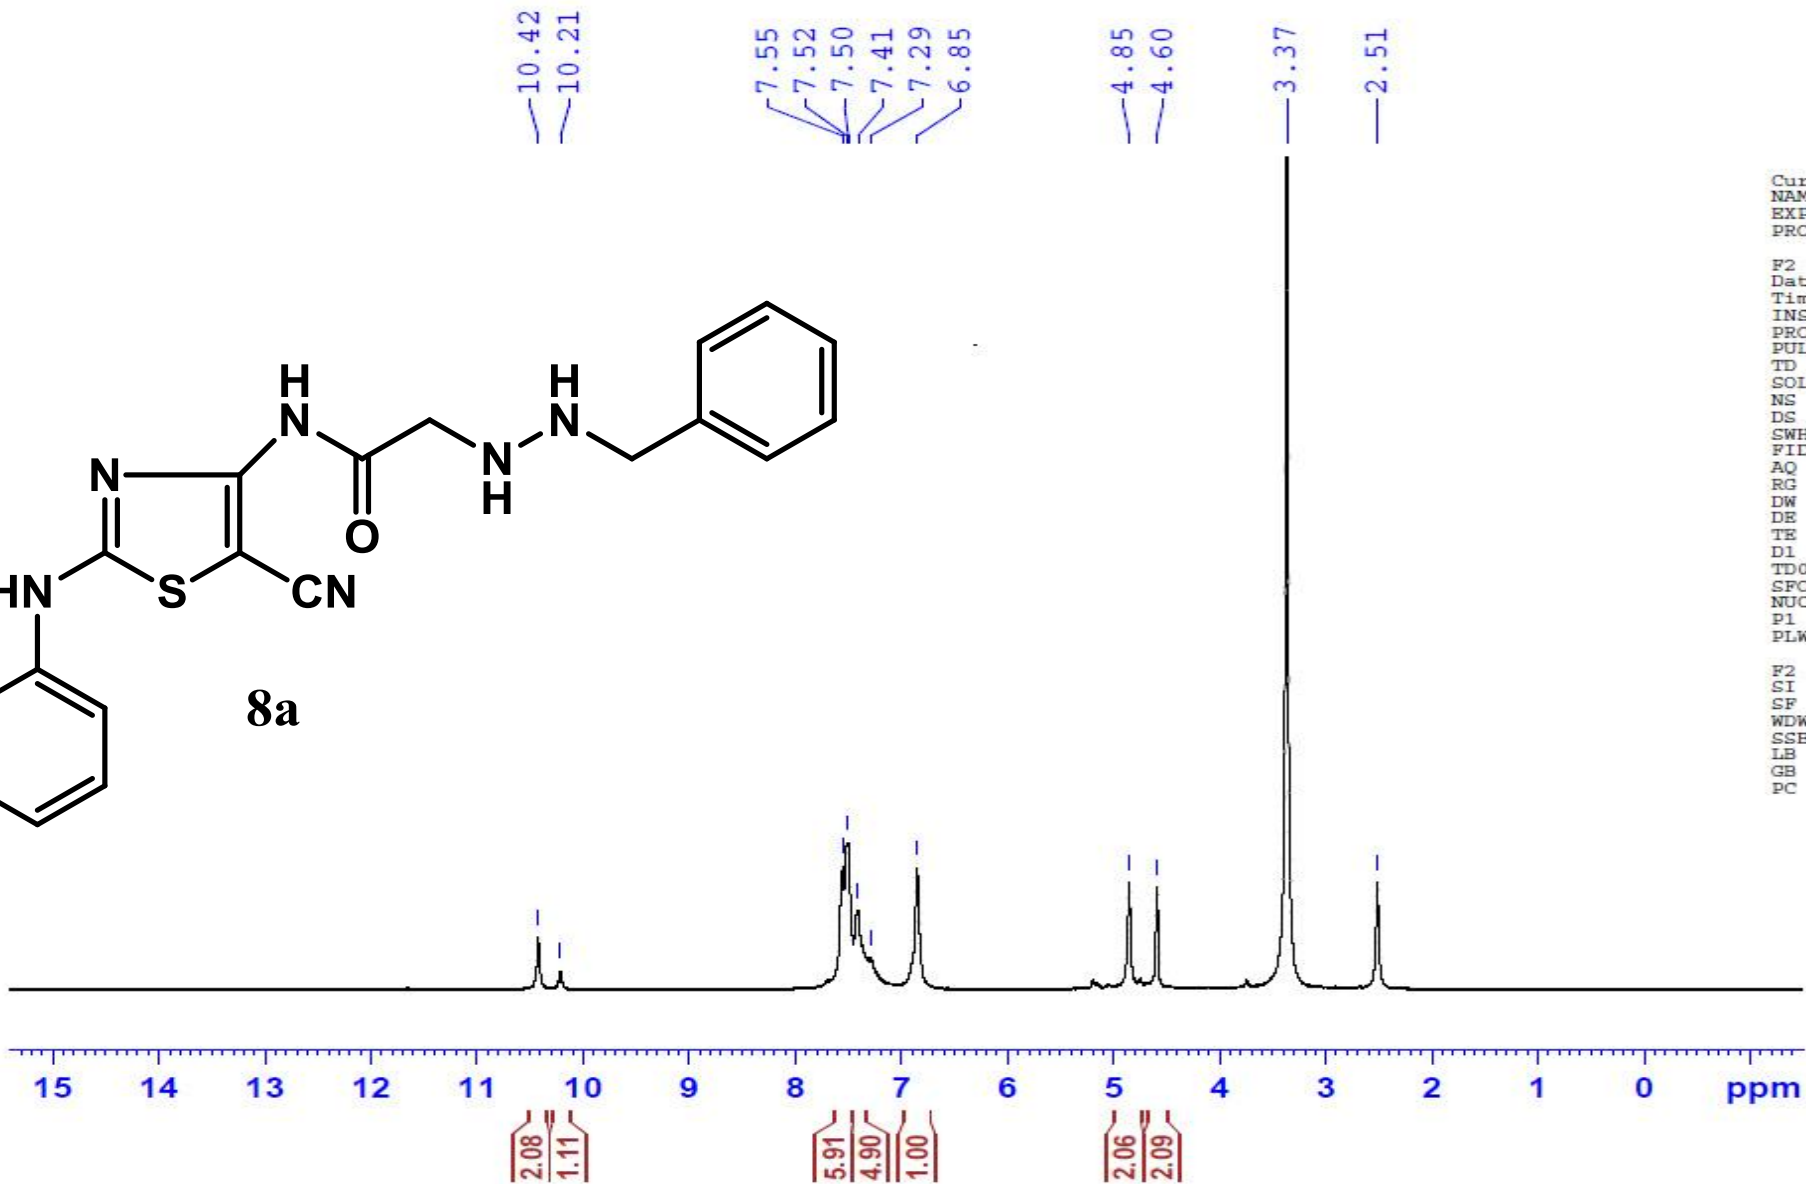

Current Data Parameters  
NAME Alaa abdallah-VI-Hnmr-ES  
EXPNO 10  
PROCNO 1

F2 - Acquisition Parameters  
Date\_ 20210914  
Time 10.48 h  
INSTRUM spect  
PROBHD Z108618\_0945 (   
PULPROG zg30  
TD 65536  
SOLVENT DMSO  
NS 16  
DS 2  
SWH 8012.820 Hz  
FIDRES 0.244532 Hz  
AQ 4.0894465 sec  
RG 135.42  
DW 62.400 usec  
DE 6.50 usec  
TE 295.4 K  
D1 1.00000000 sec  
TD0 1  
SFO1 400.2024712 MHz  
NUC1 1H  
P1 13.50 usec  
PLW1 13.00000000 W

F2 - Processing parameters  
SI 65536  
SF 400.2000000 MHz  
WDW EM  
SSB 0  
LB 0.30 Hz  
GB 0  
PC 1.00

Allaa abdallah-VI-carbon-ES

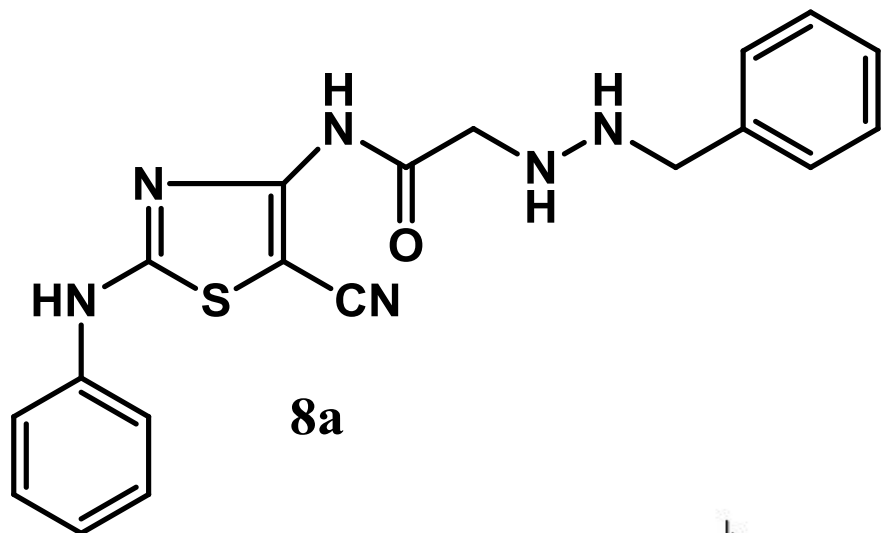

168.91  
165.34  
152.00  
144.04  
143.93  
129.86  
128.95  
128.89  
127.09  
123.31  
118.34  
113.61

58.19  
54.84  
54.37  
40.58  
40.37  
40.16  
39.95  
39.74  
39.53  
39.33

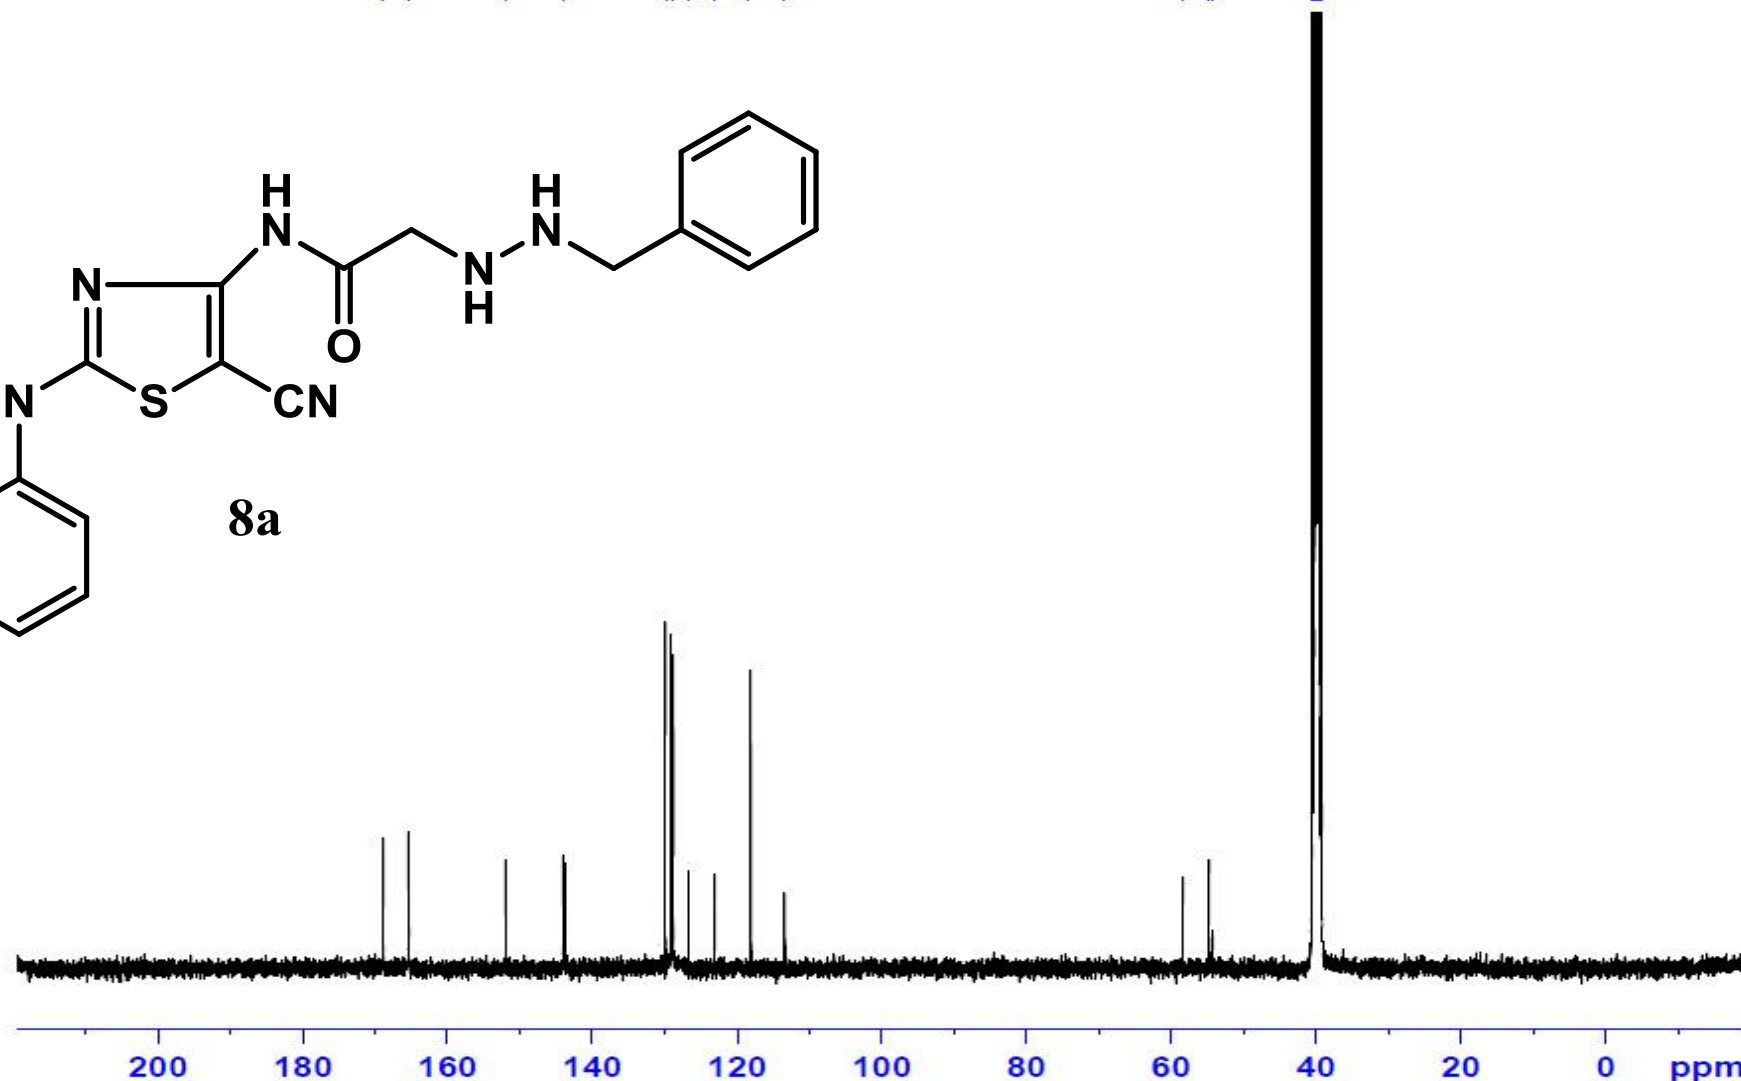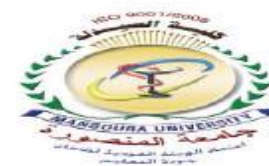

Current Data Parameters  
 NAME Allaa abdallah-VI-carbon-ES  
 EXPNO 10  
 PROCNO 1

F2 - Acquisition Parameters  
 Date 20211016  
 Time 0 h  
 INSTRUM spect  
 PROBHD Z108618\_0945 ( )  
 PULPROG zgpg30  
 TD 65536  
 SOLVENT DMSO  
 NS 2200  
 DS 4  
 SWH 24038.461 Hz  
 FIDRES 0.733596 Hz  
 AQ 1.3631488 sec  
 RG 197.77  
 DW 20.800 usec  
 DE 6.50 usec  
 TE 295.8 K  
 D1 2.00000000 sec  
 D11 0.03000000 sec  
 TD0 1  
 SFO1 100.6404331 MHz  
 NUC1 13C  
 P1 10.00 usec  
 PLW1 47.00000000 W  
 SFO2 400.2016008 MHz  
 NUC2 1H  
 CPDPRG2 waltz16  
 PCPD2 90.00 usec  
 PLW2 13.00000000 W  
 PLW12 0.29249999 W  
 PLW13 0.14713000 W

F2 - Processing parameters  
 SI 32768  
 SF 100.6303700 MHz  
 WDW EM  
 SSB 0  
 LB 1.00 Hz  
 GB 0  
 PC 1.40

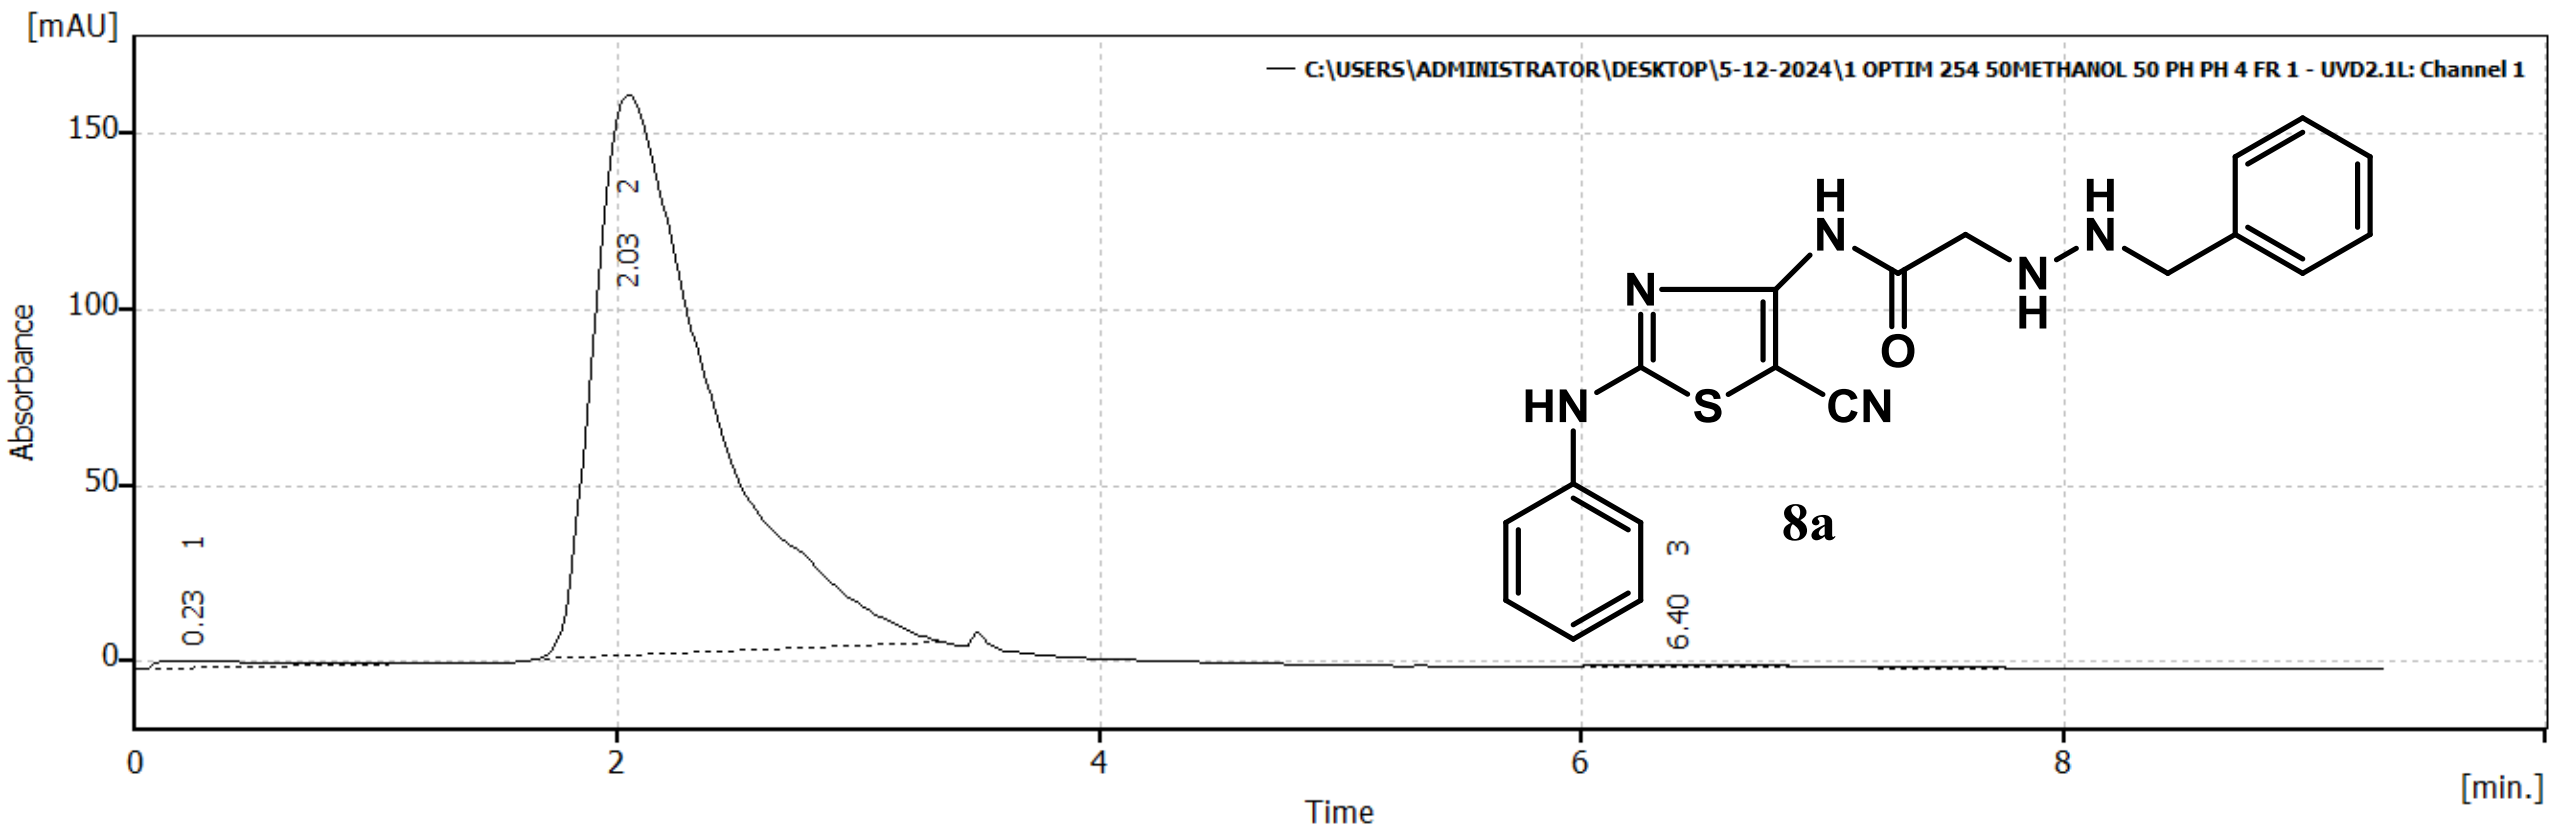



21 b

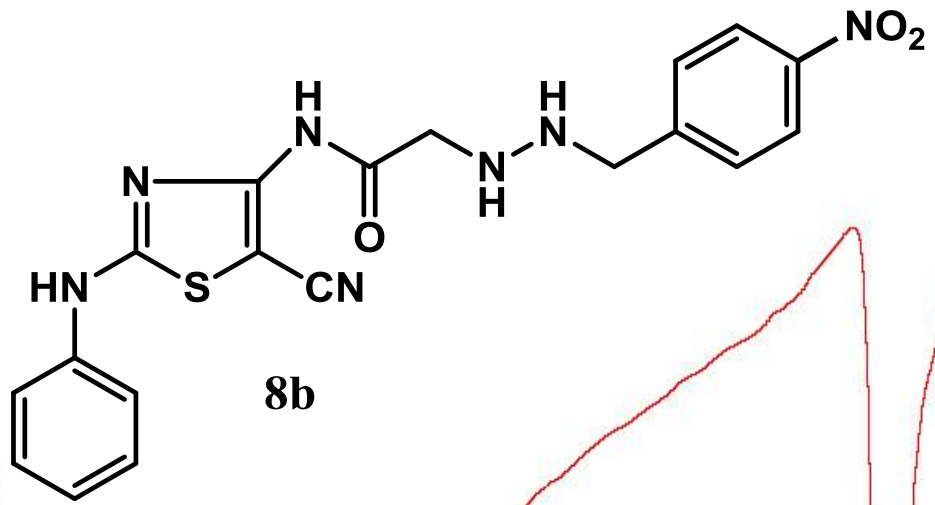

% Transmittance

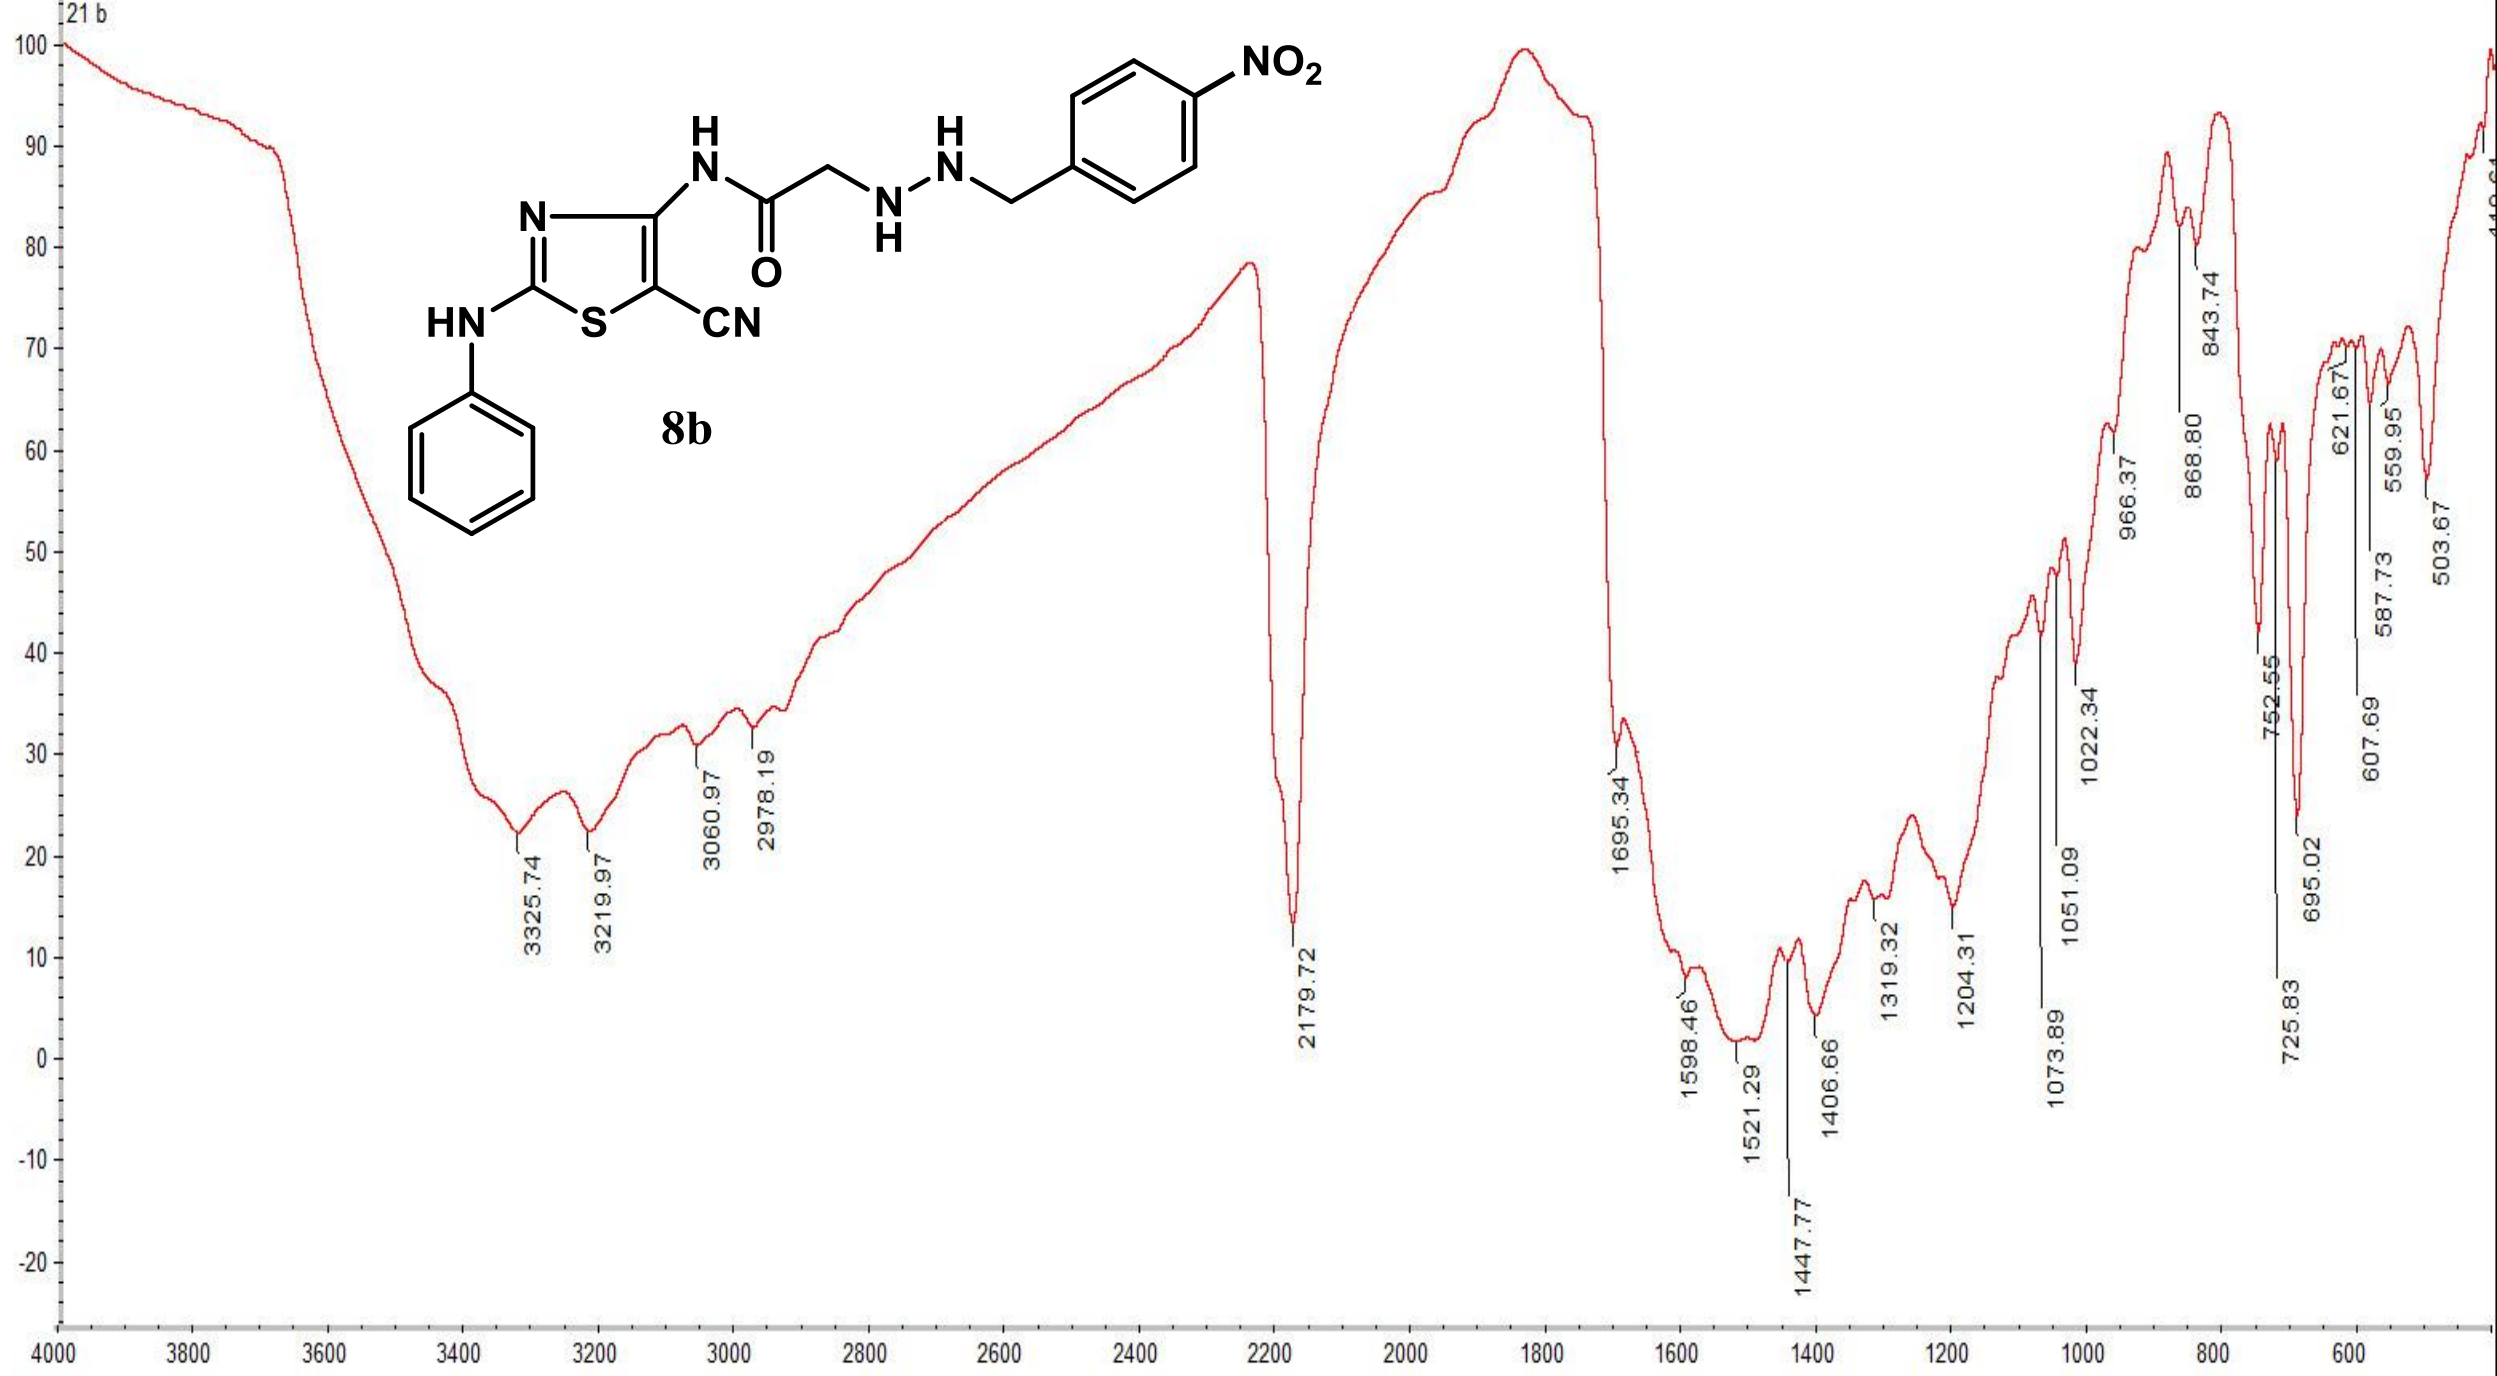

Wavenumbers (cm-1)



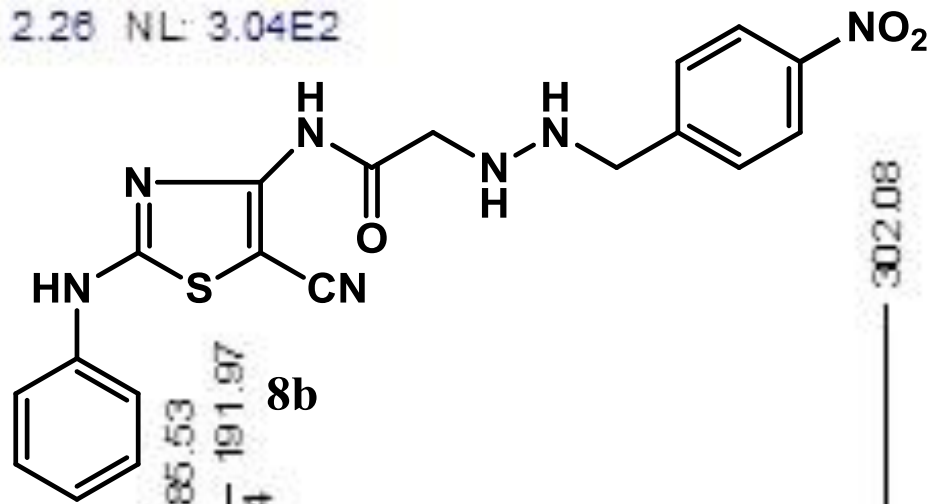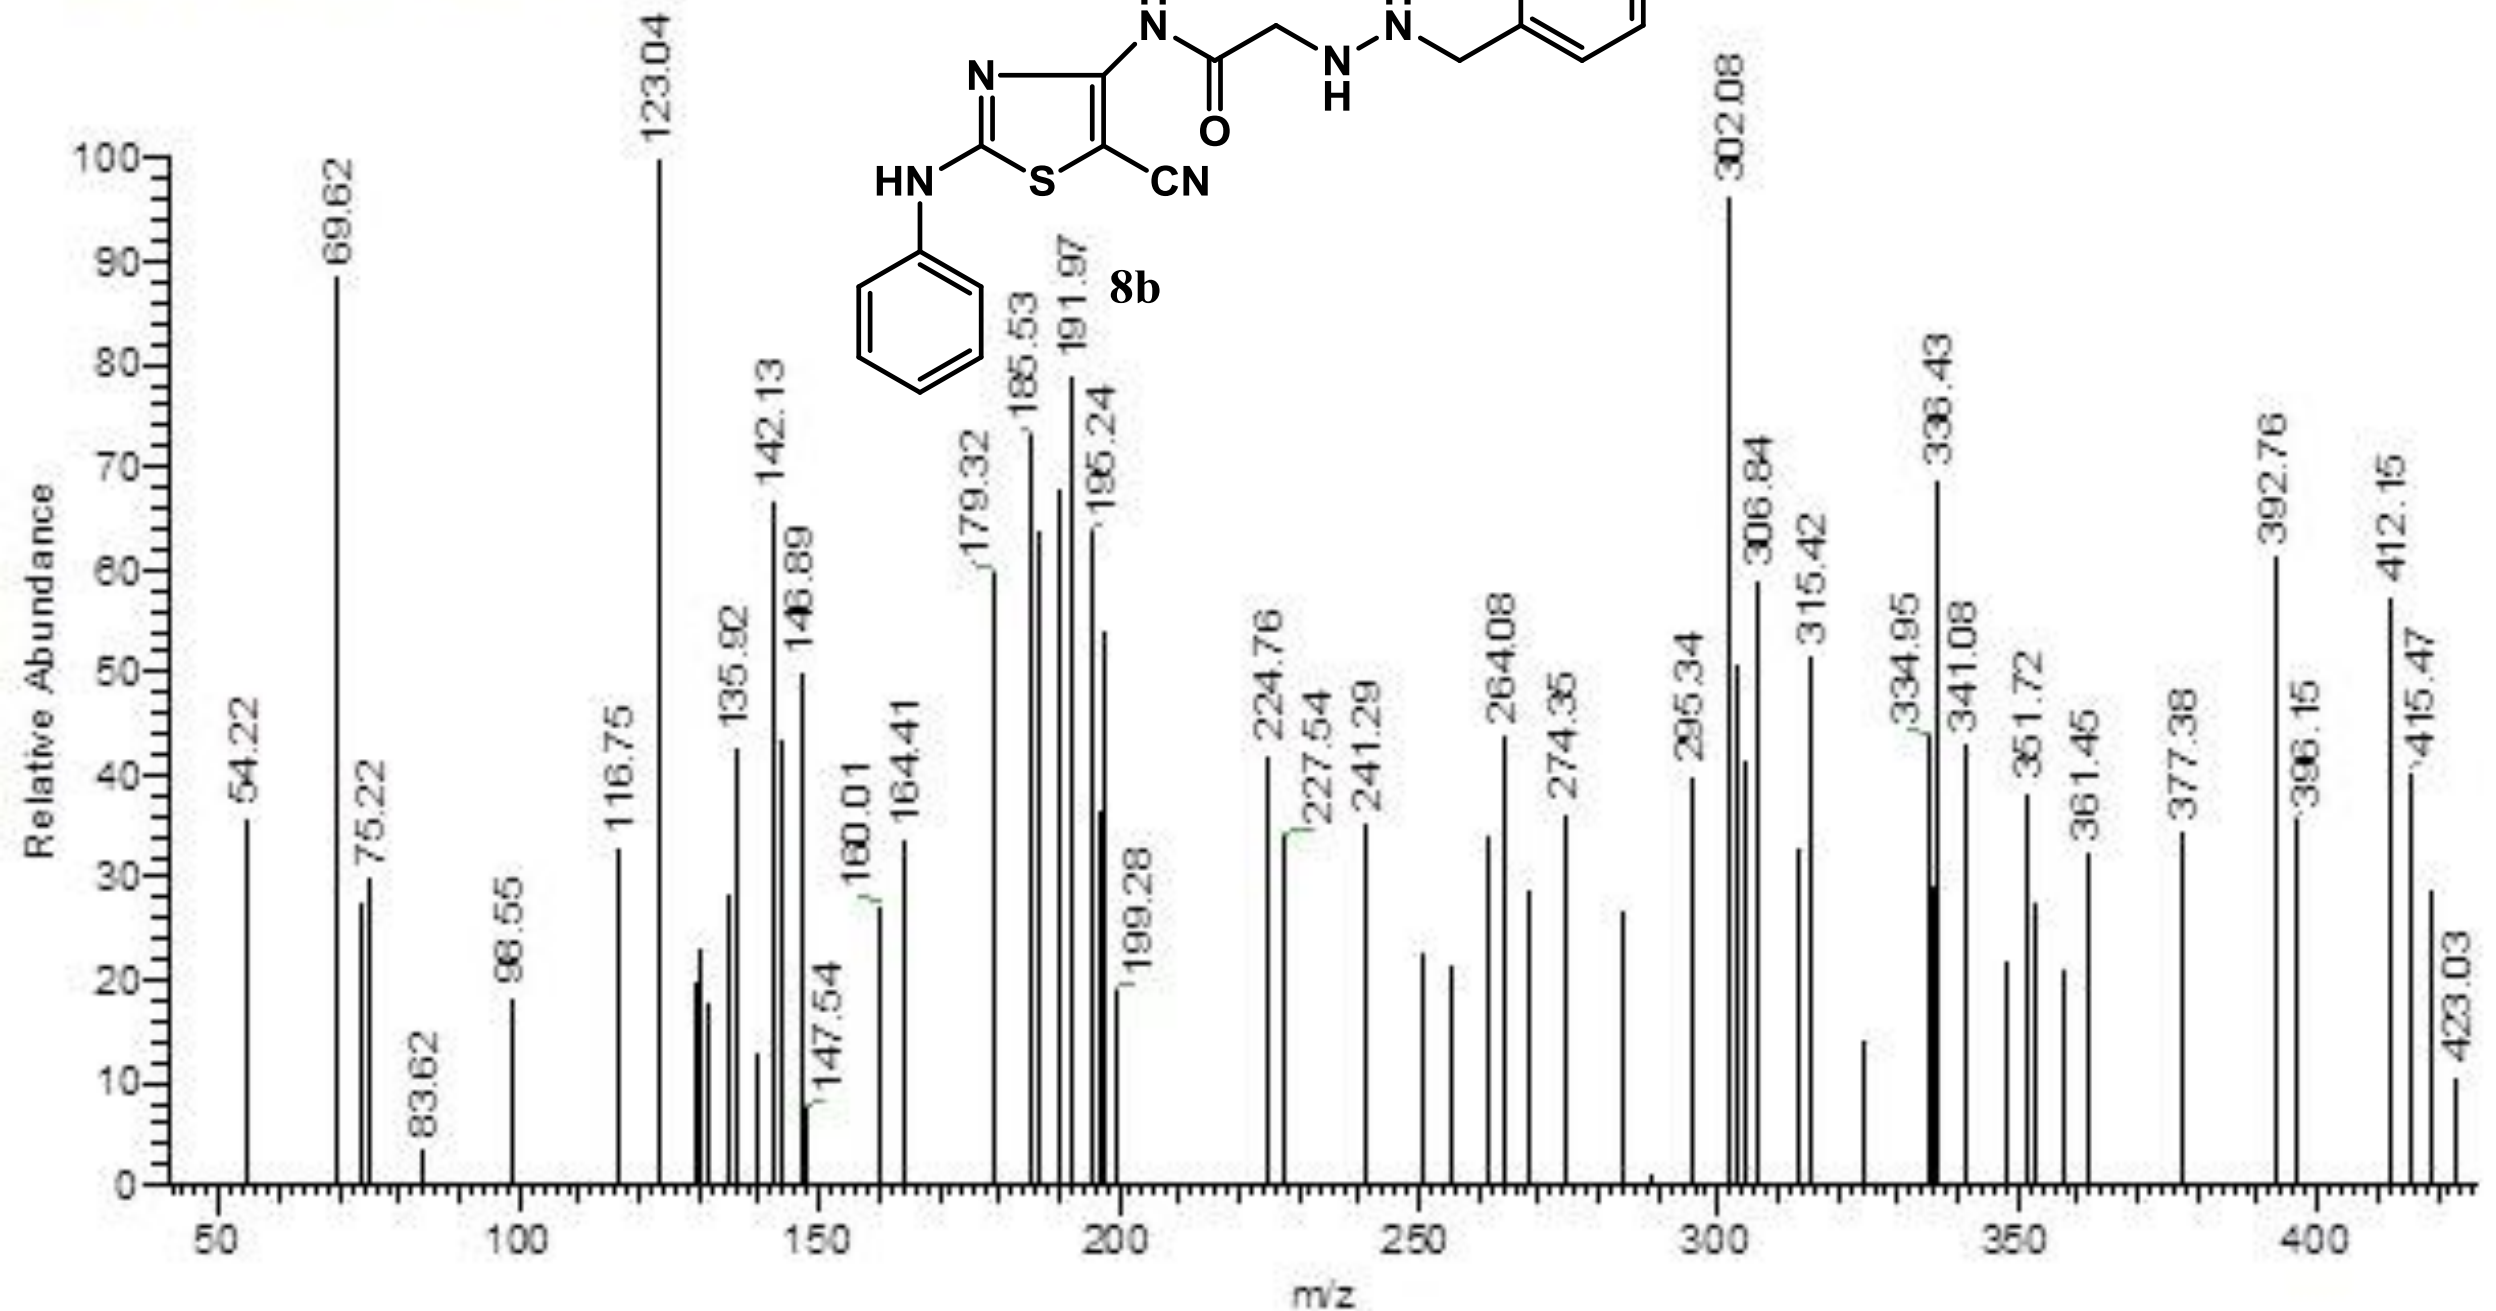

Alaa Abdallah-4-Hnmr-DMSO-A

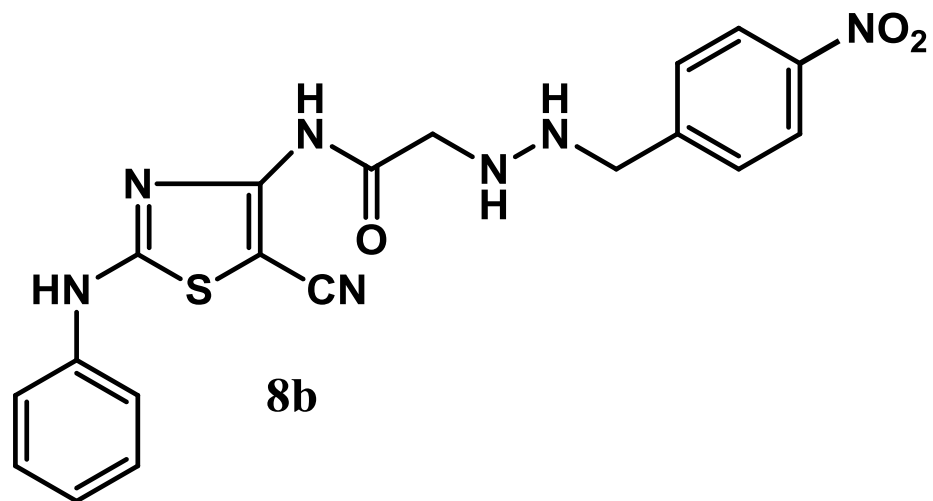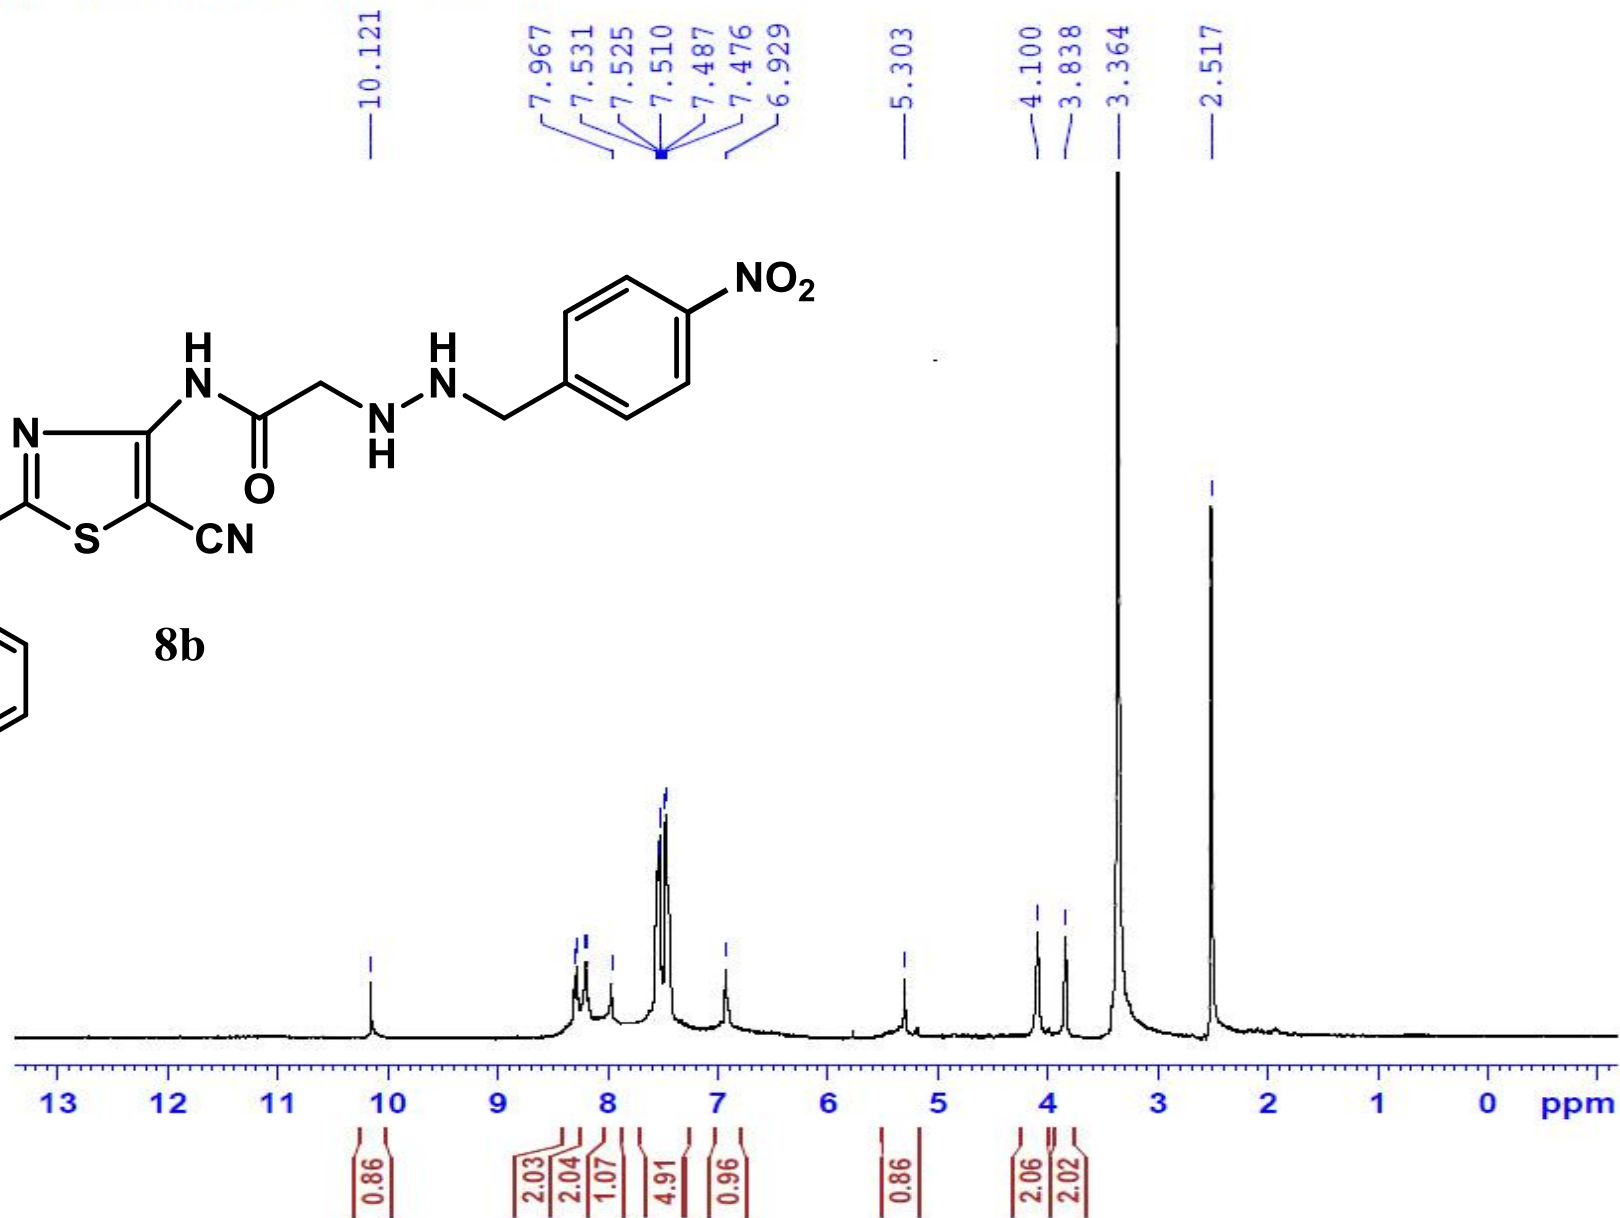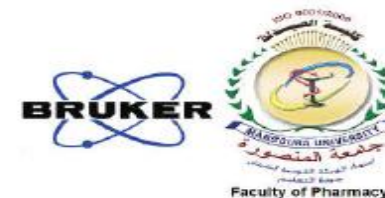

Current Data Parameters  
NAME Alaa Abdallah-4-Hnmr-DMSO-A  
EXPNO 10  
PROCNO 1

F2 - Acquisition Parameters  
Date\_ 20220421  
Time\_ 13.30 h  
INSTRUM spect  
PROBHD Z108618\_0945 (zg30)  
PULPROG zg30  
TD 65536  
SOLVENT DMSO  
NS 16  
DS 2  
SWH 8012.820 Hz  
FIDRES 0.244532 Hz  
AQ 4.0894465 sec  
RG 135.42  
DW 62.400 usec  
DE 6.50 usec  
TE 296.7 K  
D1 1.00000000 sec  
TDO 1  
SFO1 400.2024712 MHz  
NUC1 1H  
P1 13.50 usec  
PLW1 13.00000000 W

F2 - Processing parameters  
SI 65536  
SF 400.2000000 MHz  
WDW EM  
SSB 0  
LB 0.30 Hz  
GB 0  
PC 1.00

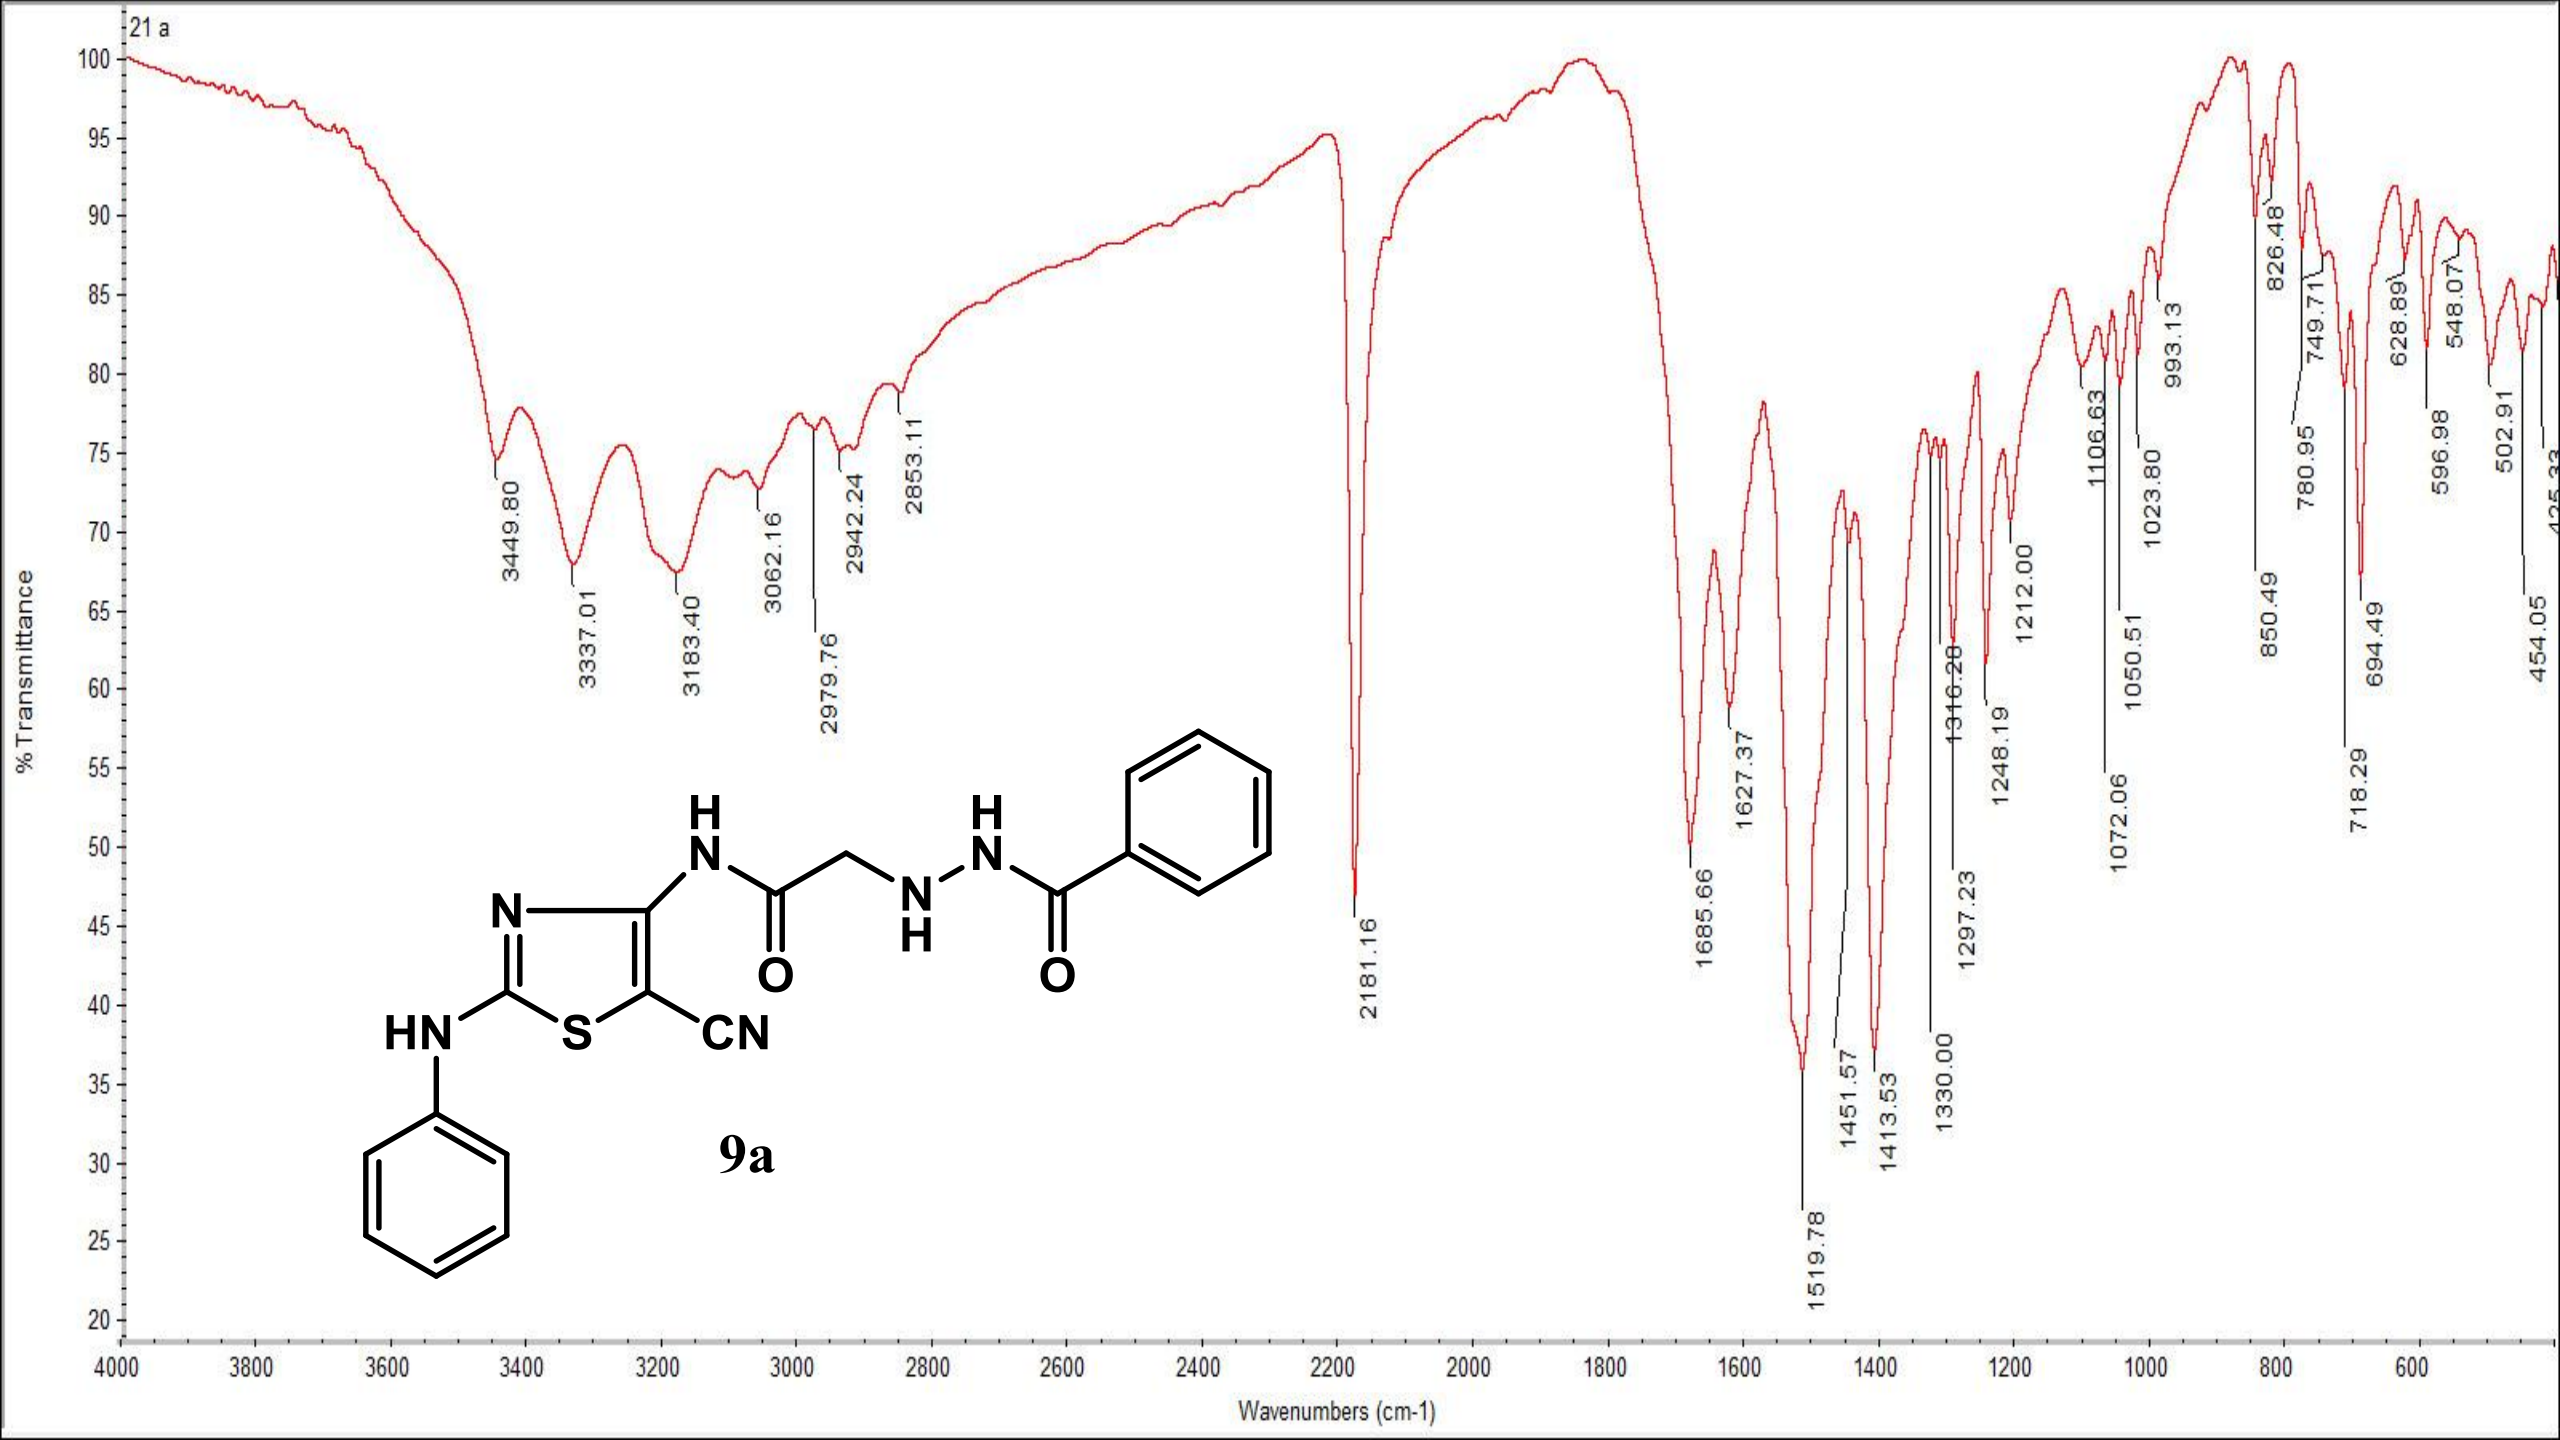

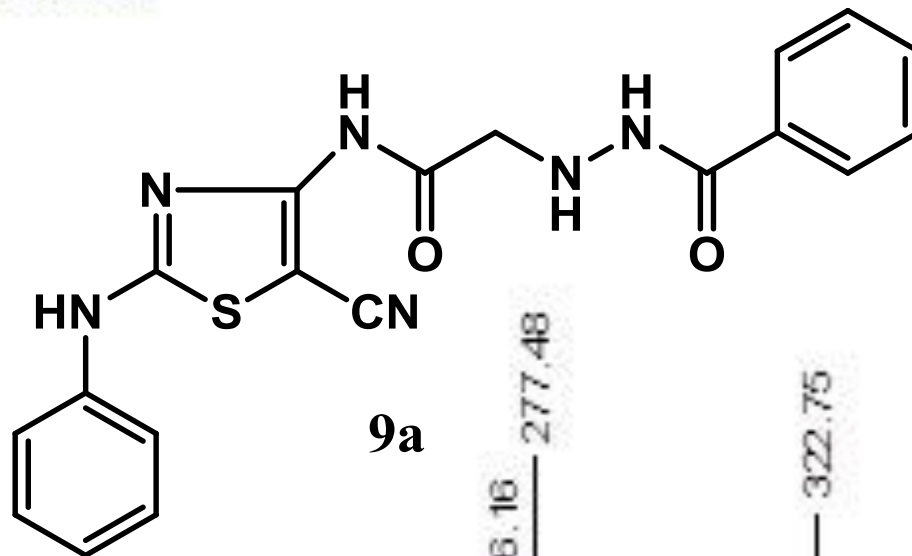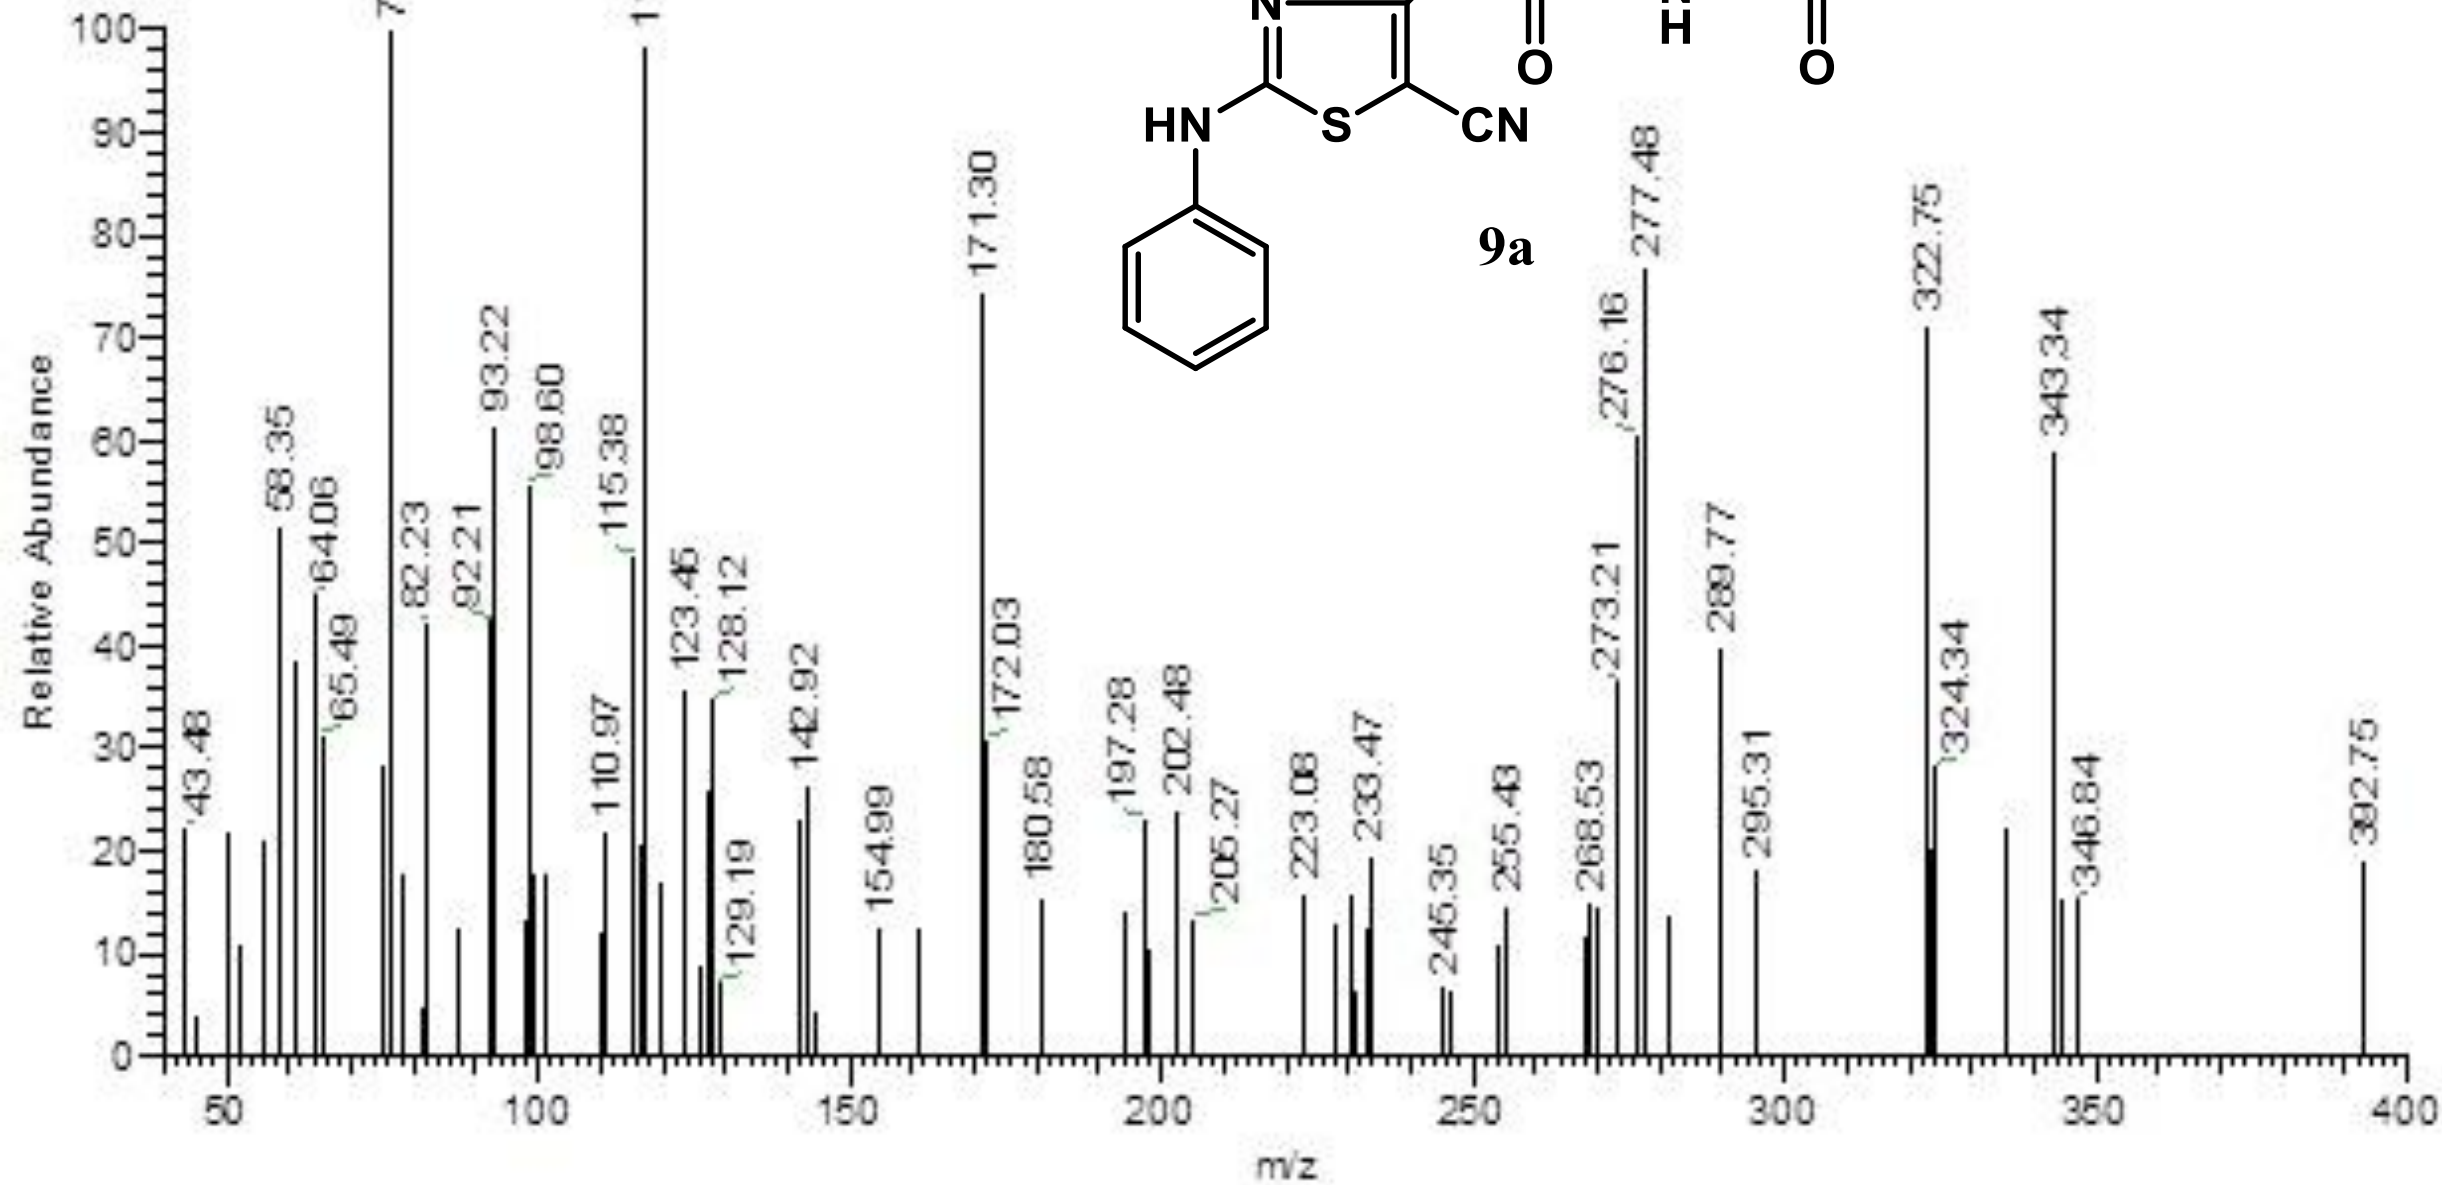



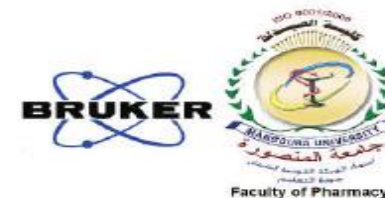

Current Data Parameters  
 NAME Alaa Abdullah-13-HNMF  
 EXPNO 10  
 PROCNO 1

F2 - Acquisition Parameters  
 Date\_ 20220510  
 Time\_ 20.05 h  
 INSTRUM spect  
 PROBHD Z108618\_0945 (  
 PULPROG zg30  
 TD 65536  
 SOLVENT DMSO  
 NS 16  
 DS 2  
 SWH 8012.820 Hz  
 FIDRES 0.244532 Hz  
 AQ 4.0894465 sec  
 RG 88.92  
 DW 62.400 usec  
 DE 6.50 usec  
 TE 295.1 K  
 D1 1.00000000 sec  
 TD0 1  
 SFO1 400.2024712 MHz  
 NUC1 1H  
 P1 13.50 usec  
 PLW1 13.00000000 W

F2 - Processing parameters  
 SI 65536  
 SF 400.2000000 MHz  
 WDW EM  
 SSB 0  
 LB 0.30 Hz  
 GB 0  
 PC 1.00

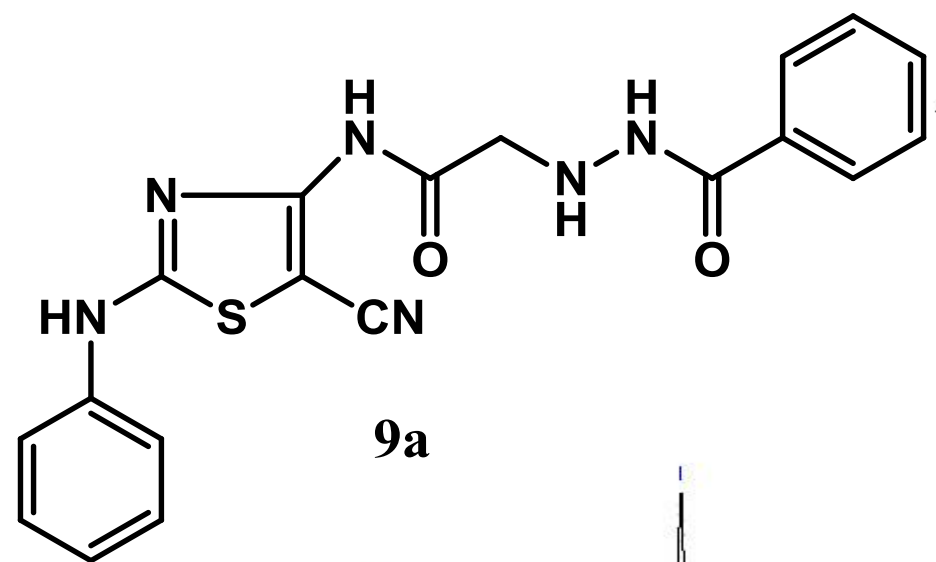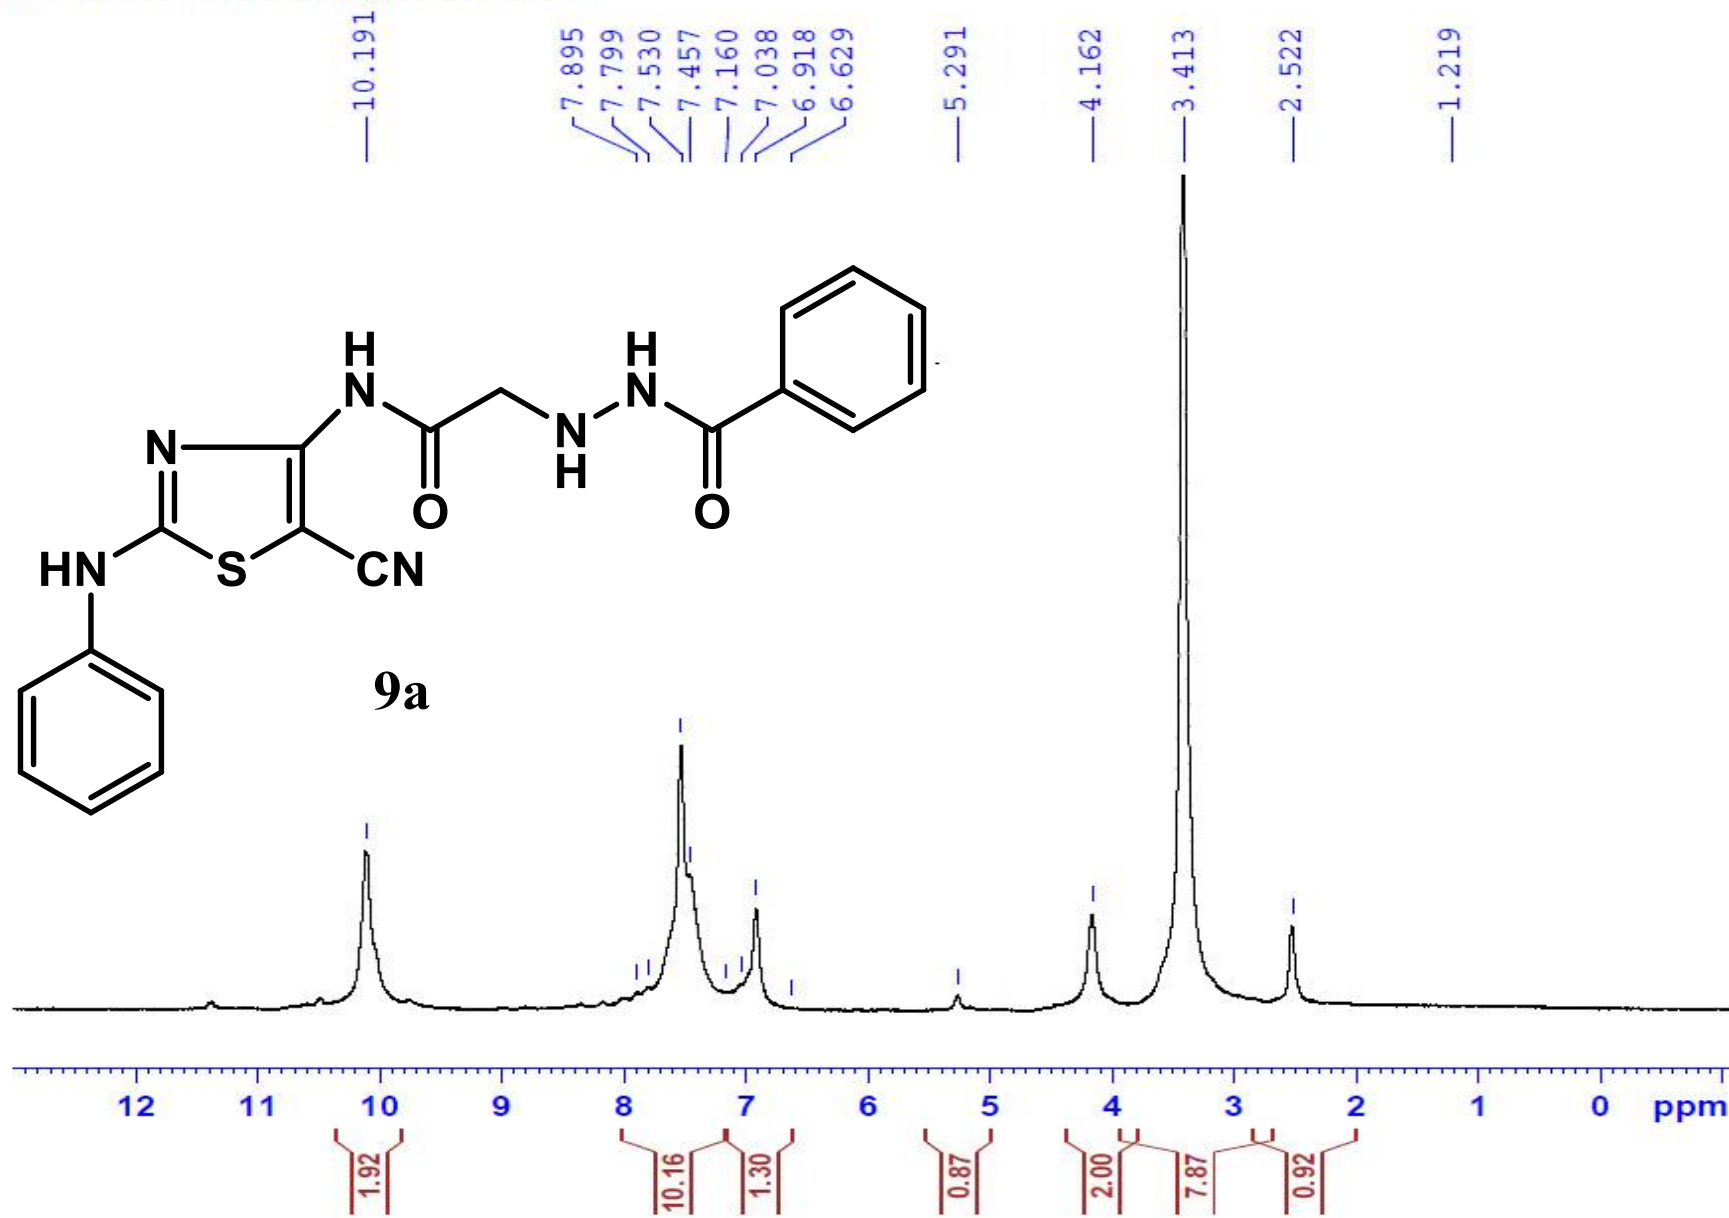

Alaa Abdullah - 13 - C13 - T

170.0546  
169.0892  
165.2344  
147.7945  
143.5345  
132.5980  
130.9785  
130.6186  
128.8603  
127.1775  
123.0088  
118.0319  
115.3852

64.2062  
54.0032  
40.5385  
40.3300  
40.1216  
39.9129  
39.7043  
39.4957  
39.2870

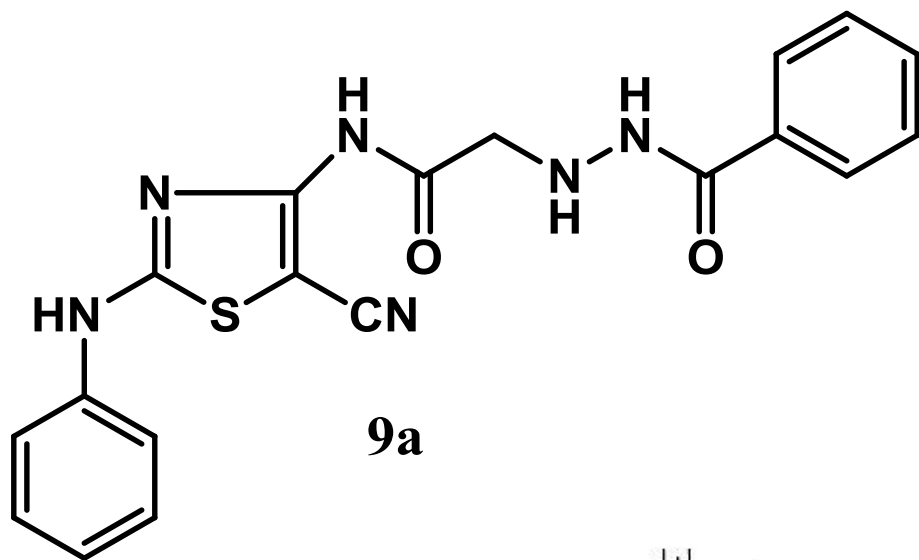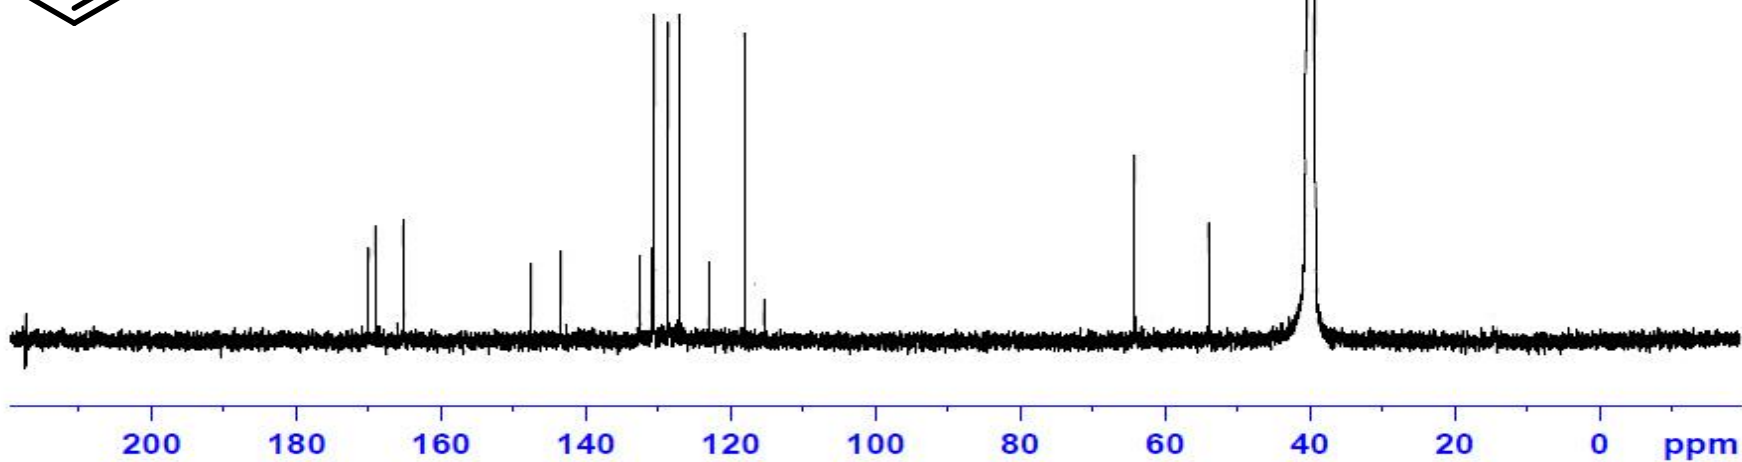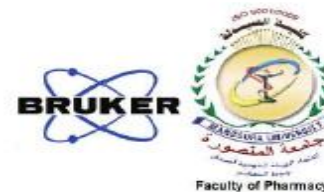

Current Data Parameters  
NAME Alaa Abdullah - 13 - C13 - T  
EXPNO 10  
PROCNO 1

F2 - Acquisition Parameters  
Date\_ 20220516  
Time 20.41 h  
INSTRUM spect  
PROBHD Z108618\_0945 ( )  
PULPROG zgpg30  
TD 65536  
SOLVENT DMSO  
NS 2100  
DS 4  
SWH 24038.461 Hz  
FIDRES 0.733596 Hz  
AQ 1.3631488 sec  
RG 197.77  
EW 20.800 usec  
DE 6.50 usec  
TE 300.2 K  
D1 2.00000000 sec  
D11 0.03000000 sec  
TDO 1  
SFO1 100.6404331 MHz  
NUC1 13C  
P1 10.00 usec  
PLW1 47.00000000 W  
SFO2 400.2016008 MHz  
NUC2 1H  
CPDPRG2 waltz16  
PCPD2 90.00 usec  
PLW2 13.00000000 W  
PLW12 0.29249999 W  
PLW13 0.14713000 W

F2 - Processing parameters  
SI 32768  
SF 100.6303700 MHz  
WDW EM  
SSB 0  
LB 1.00 Hz  
GB 0  
PC 1.40

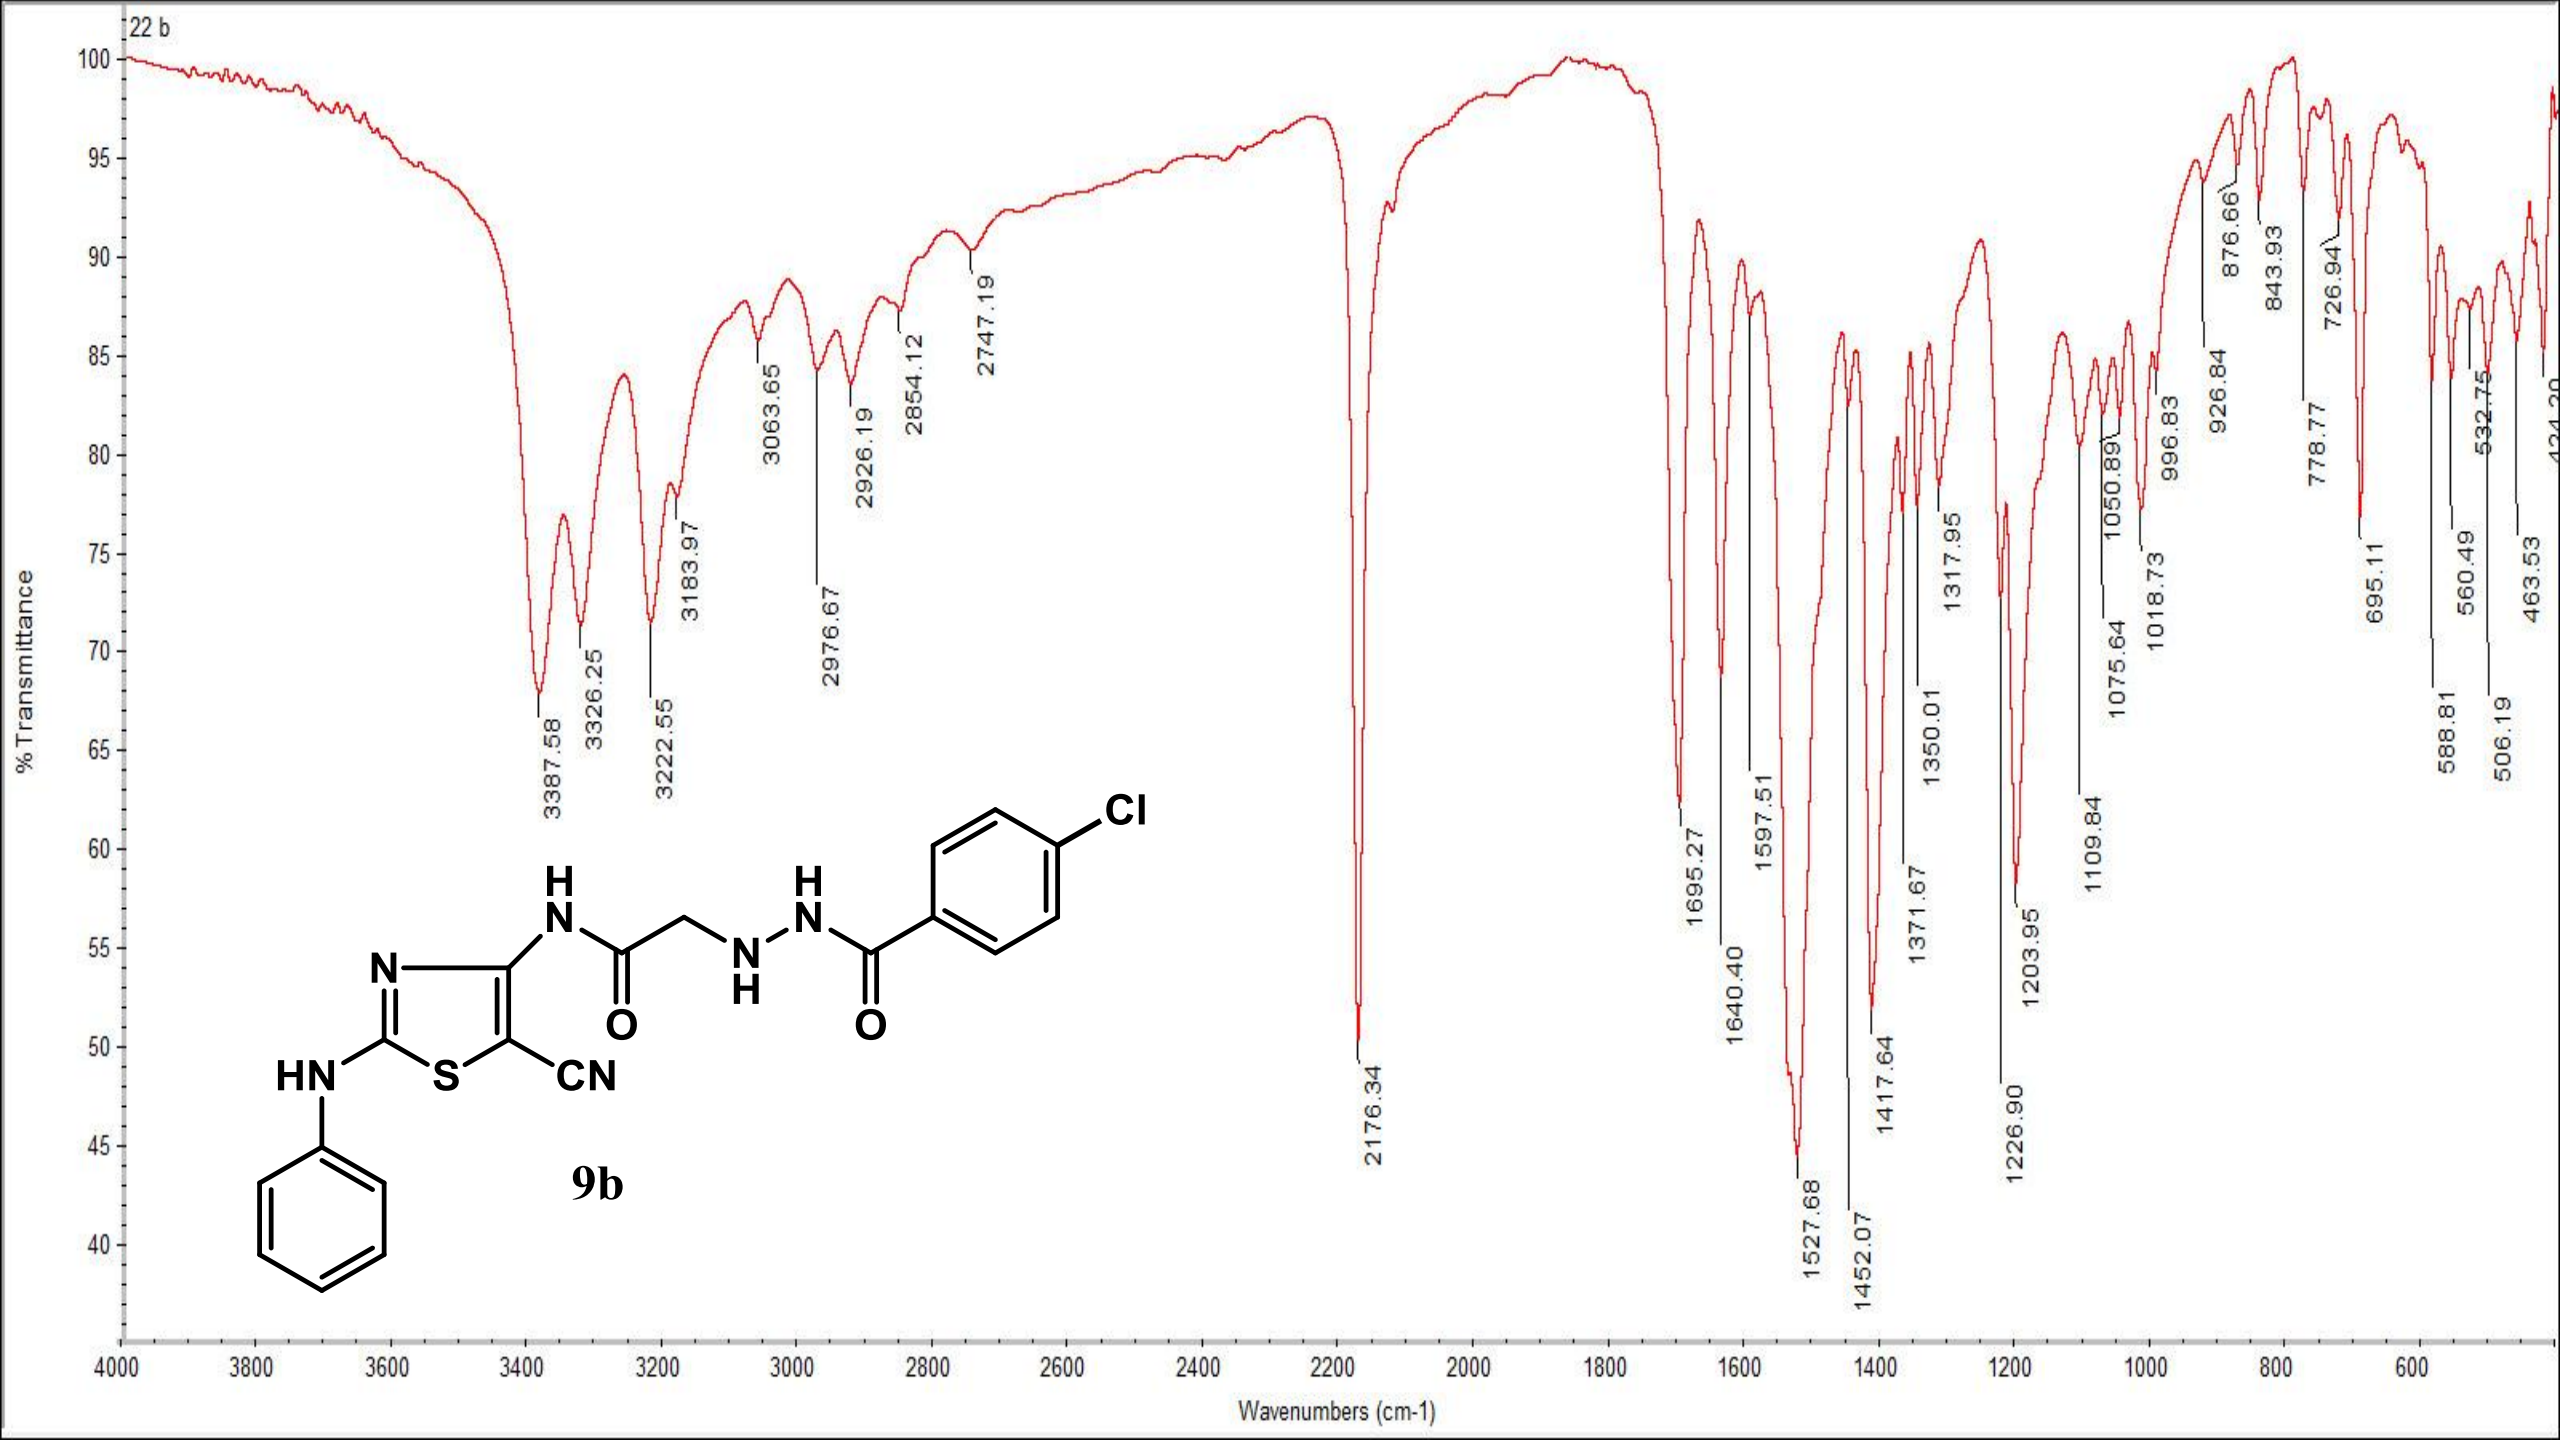



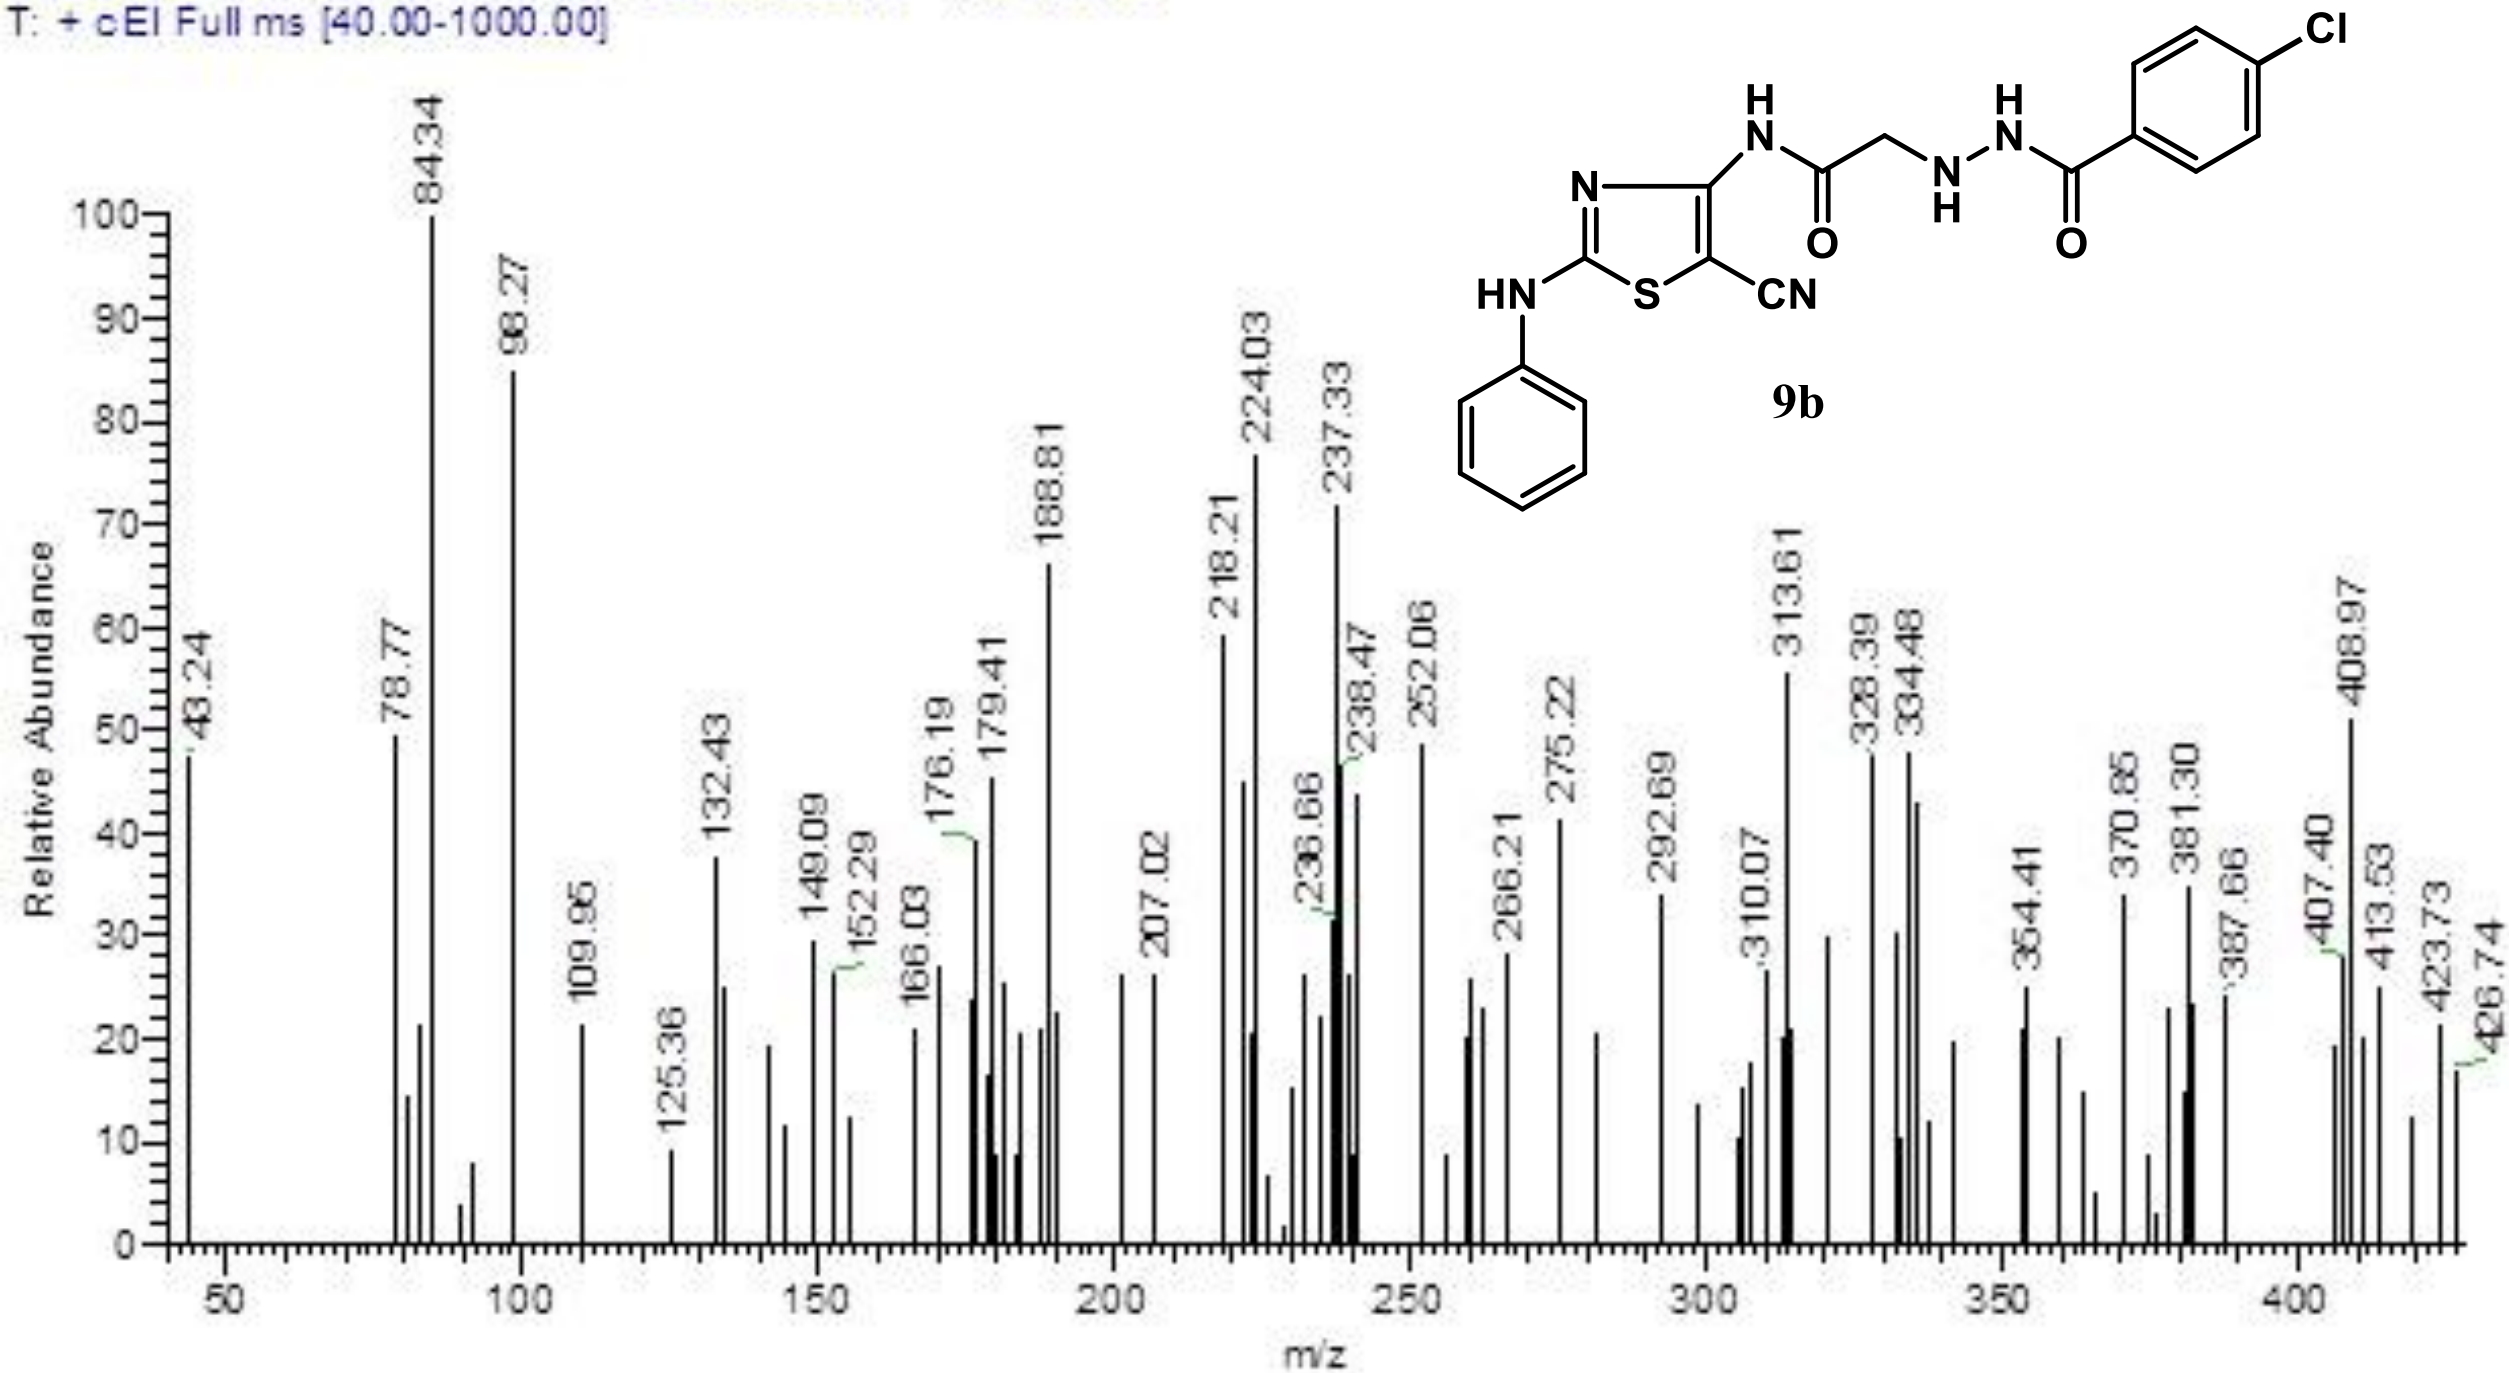

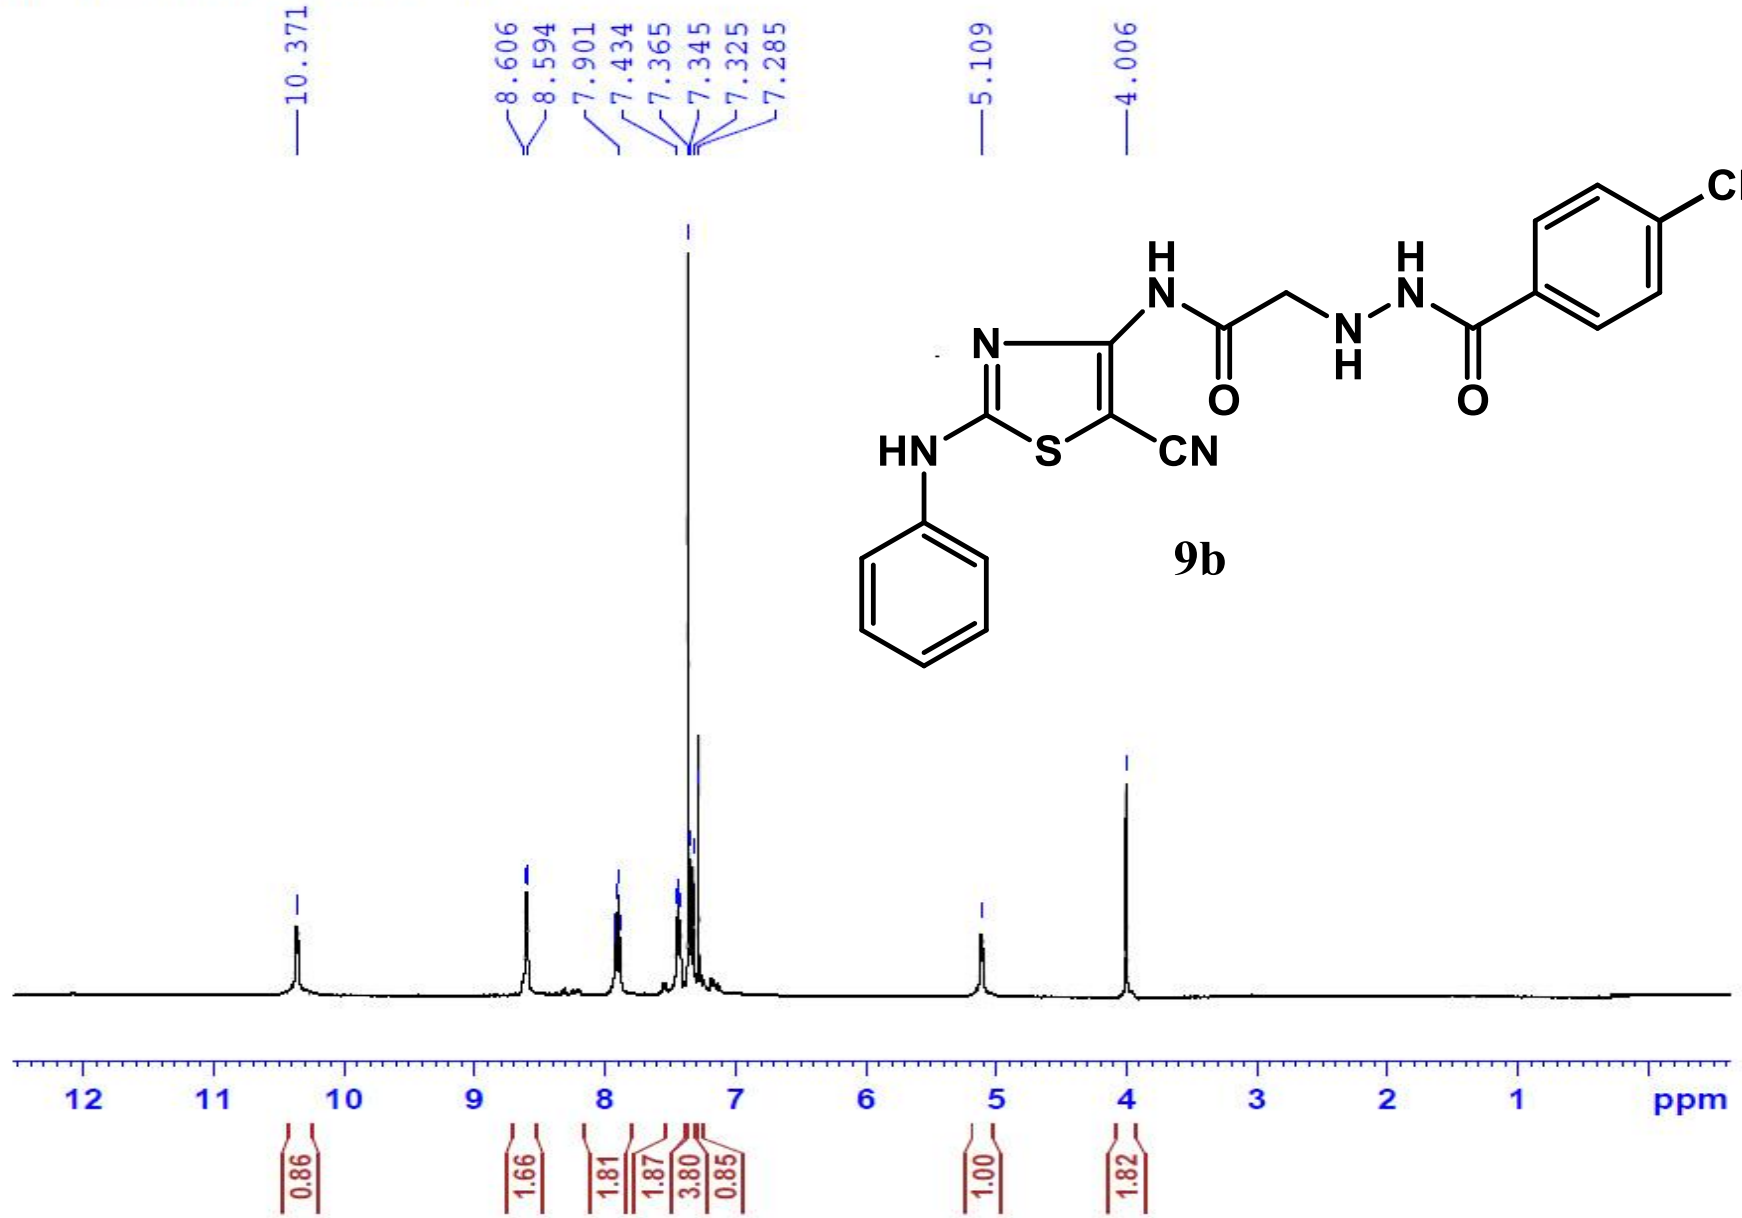

Current Data Parameters  
 NAME Alaa Abdullah-14-HNMF  
 EXPNO 10  
 PROCNO 1

F2 - Acquisition Parameters  
 Date\_ 20220510  
 Time\_ 20.11 h  
 INSTRUM spect  
 PROBHD Z108618\_0945 (  
 PULPROG zg30  
 TD 65536  
 SOLVENT CDCl3  
 NS 16  
 DS 2  
 SWH 8012.820 Hz  
 FIDRES 0.244532 Hz  
 AQ 4.0894465 sec  
 RG 88.92  
 DW 62.400 usec  
 DE 6.50 usec  
 TE 295.0 K  
 D1 1.00000000 sec  
 TD0 1  
 SFO1 400.2024712 MHz  
 NUC1 1H  
 P1 13.50 usec  
 PLW1 13.00000000 W

F2 - Processing parameters  
 SI 65536  
 SF 400.2000000 MHz  
 WDW EM  
 SSB 0  
 LB 0.30 Hz  
 GB 0  
 PC 1.00

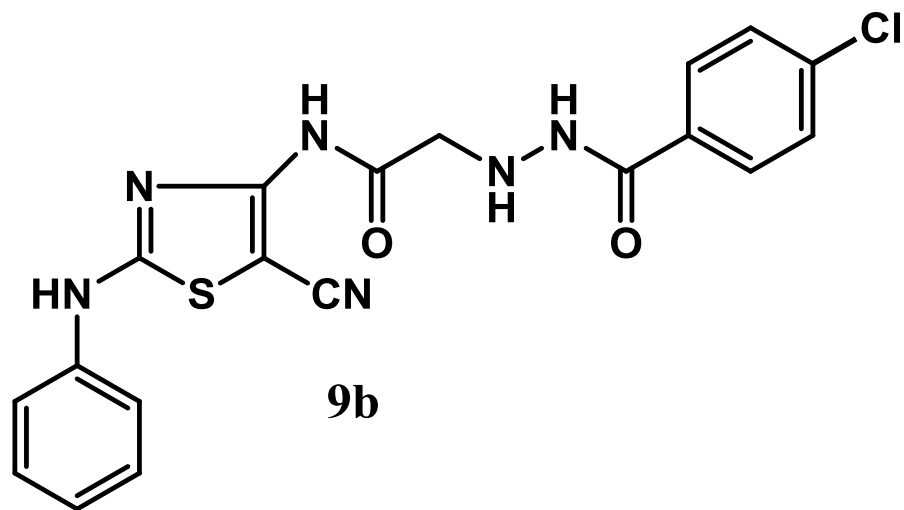

8.606  
8.598  
8.594

7.925  
7.920  
7.906  
7.901  
7.886  
7.882

7.452  
7.440  
7.434  
7.421  
7.365  
7.345  
7.325  
7.285

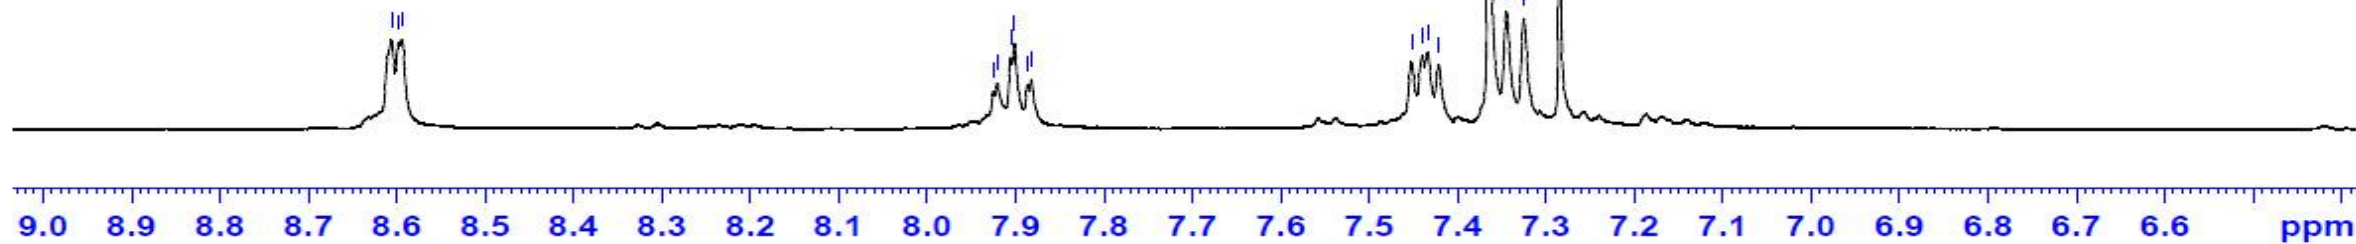

1.66

1.81

1.87  
3.80  
0.85

Alaa Abdallah-14-carbon-WH

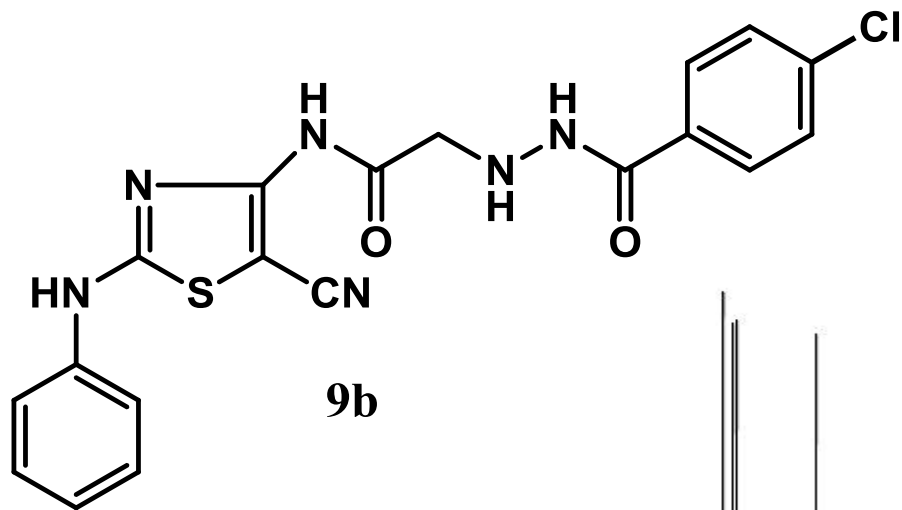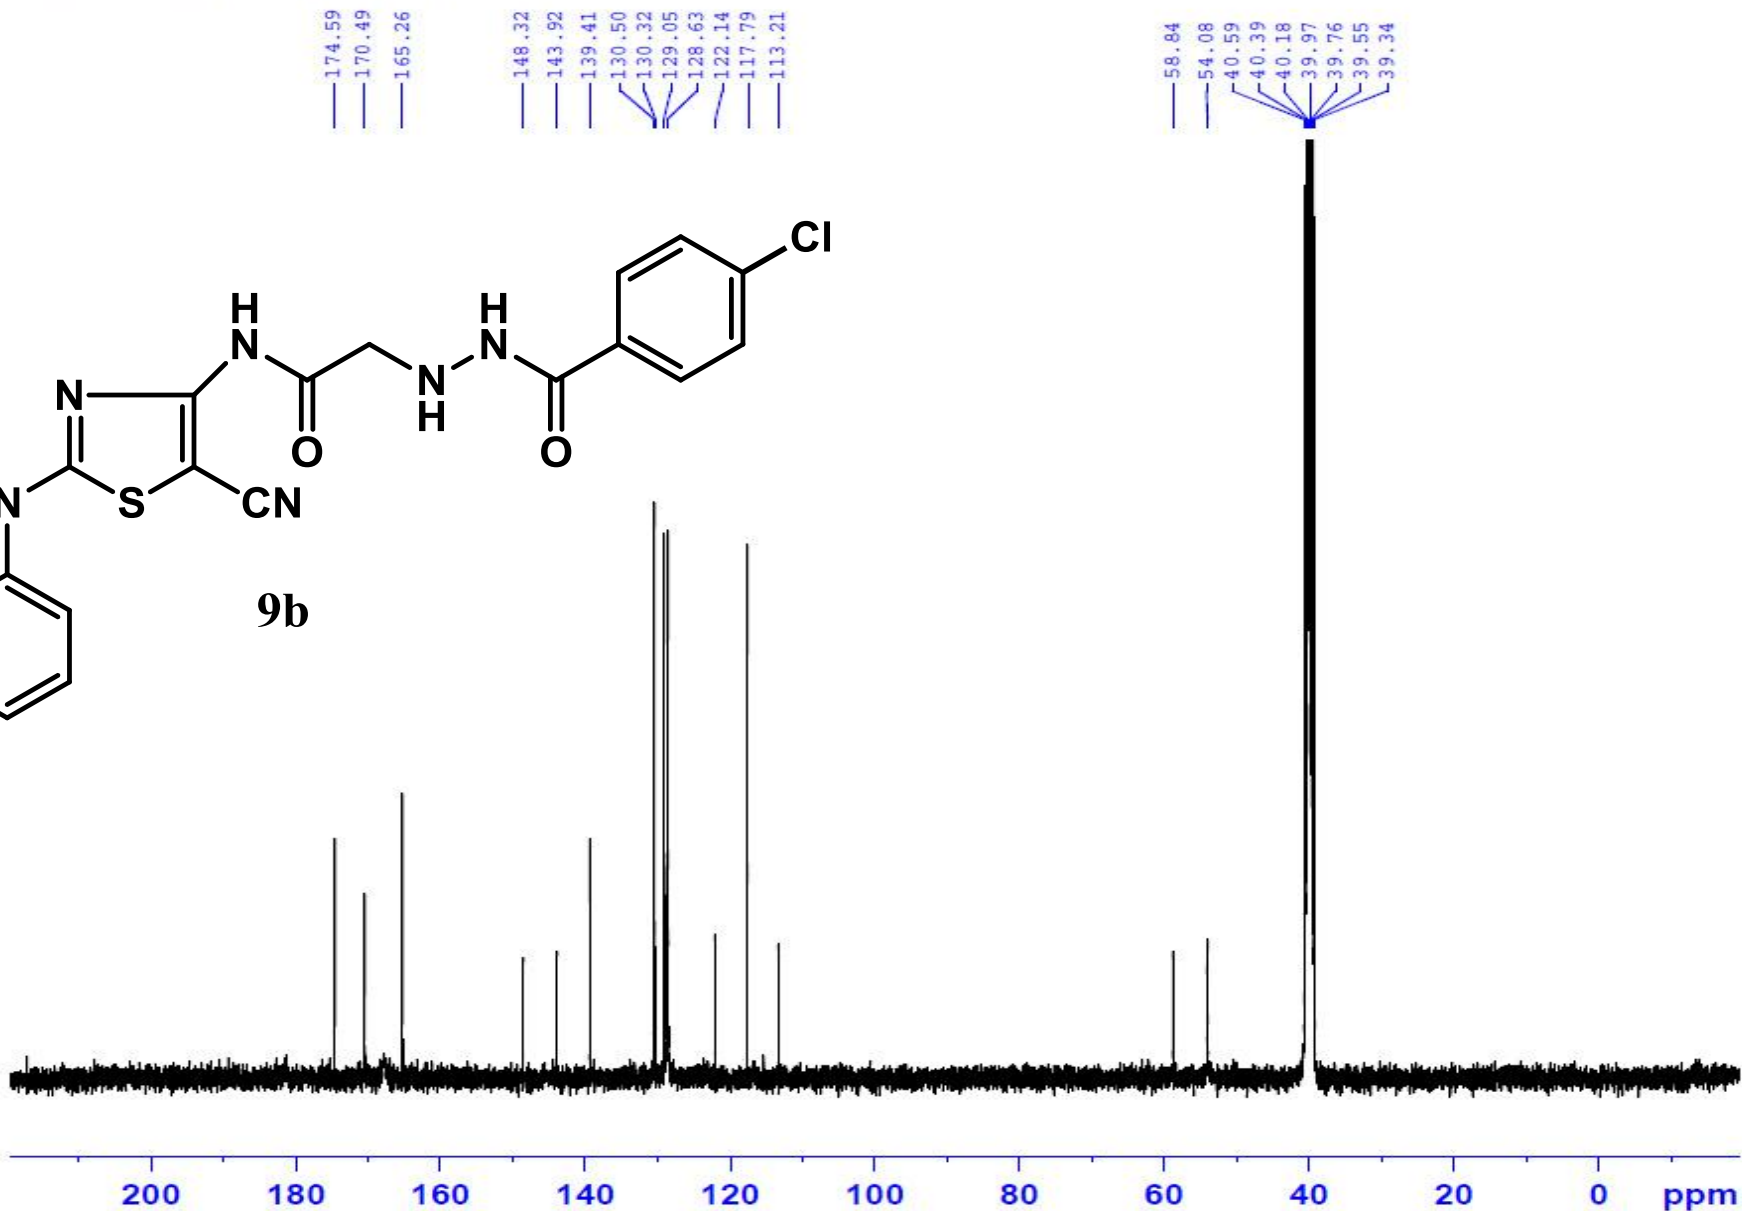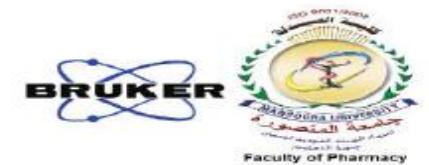

Current Data Parameters  
 NAME Alaa Abdallah-Rt.cl.A+phNCS-carbon-WH  
 EXPNO 10  
 PROCNO 1

F2 - Acquisition Parameters

Date\_ 20210903  
 Time 2.43 h  
 INSTRUM spect  
 PROBHD zgpg30  
 PULPROG zgpg30  
 TD 65536  
 SOLVENT DMSO  
 NS 2220  
 DS 4  
 SWH 24038.461 Hz  
 FIDRES 0.733596 Hz  
 AQ 1.3631488 sec  
 RG 197.77  
 DW 20.800 usec  
 DE 6.50 usec  
 TE 298.4 K  
 D1 2.00000000 sec  
 D11 0.03000000 sec  
 TD0 1  
 SFO1 100.6404331 MHz  
 NUC1 13C  
 P1 10.00 usec  
 PLW1 47.00000000 W  
 SFO2 400.2016008 MHz  
 NUC2 1H  
 CPDPRG2 waltz16  
 PCPD2 90.00 usec  
 PLW2 13.00000000 W  
 PLW12 0.29249999 W  
 PLW13 0.14713000 W

F2 - Processing parameters

SI 32768  
 SF 100.6303700 MHz  
 WDW EM  
 SSB 0  
 LB 1.00 Hz  
 GB 0  
 PC 1.40

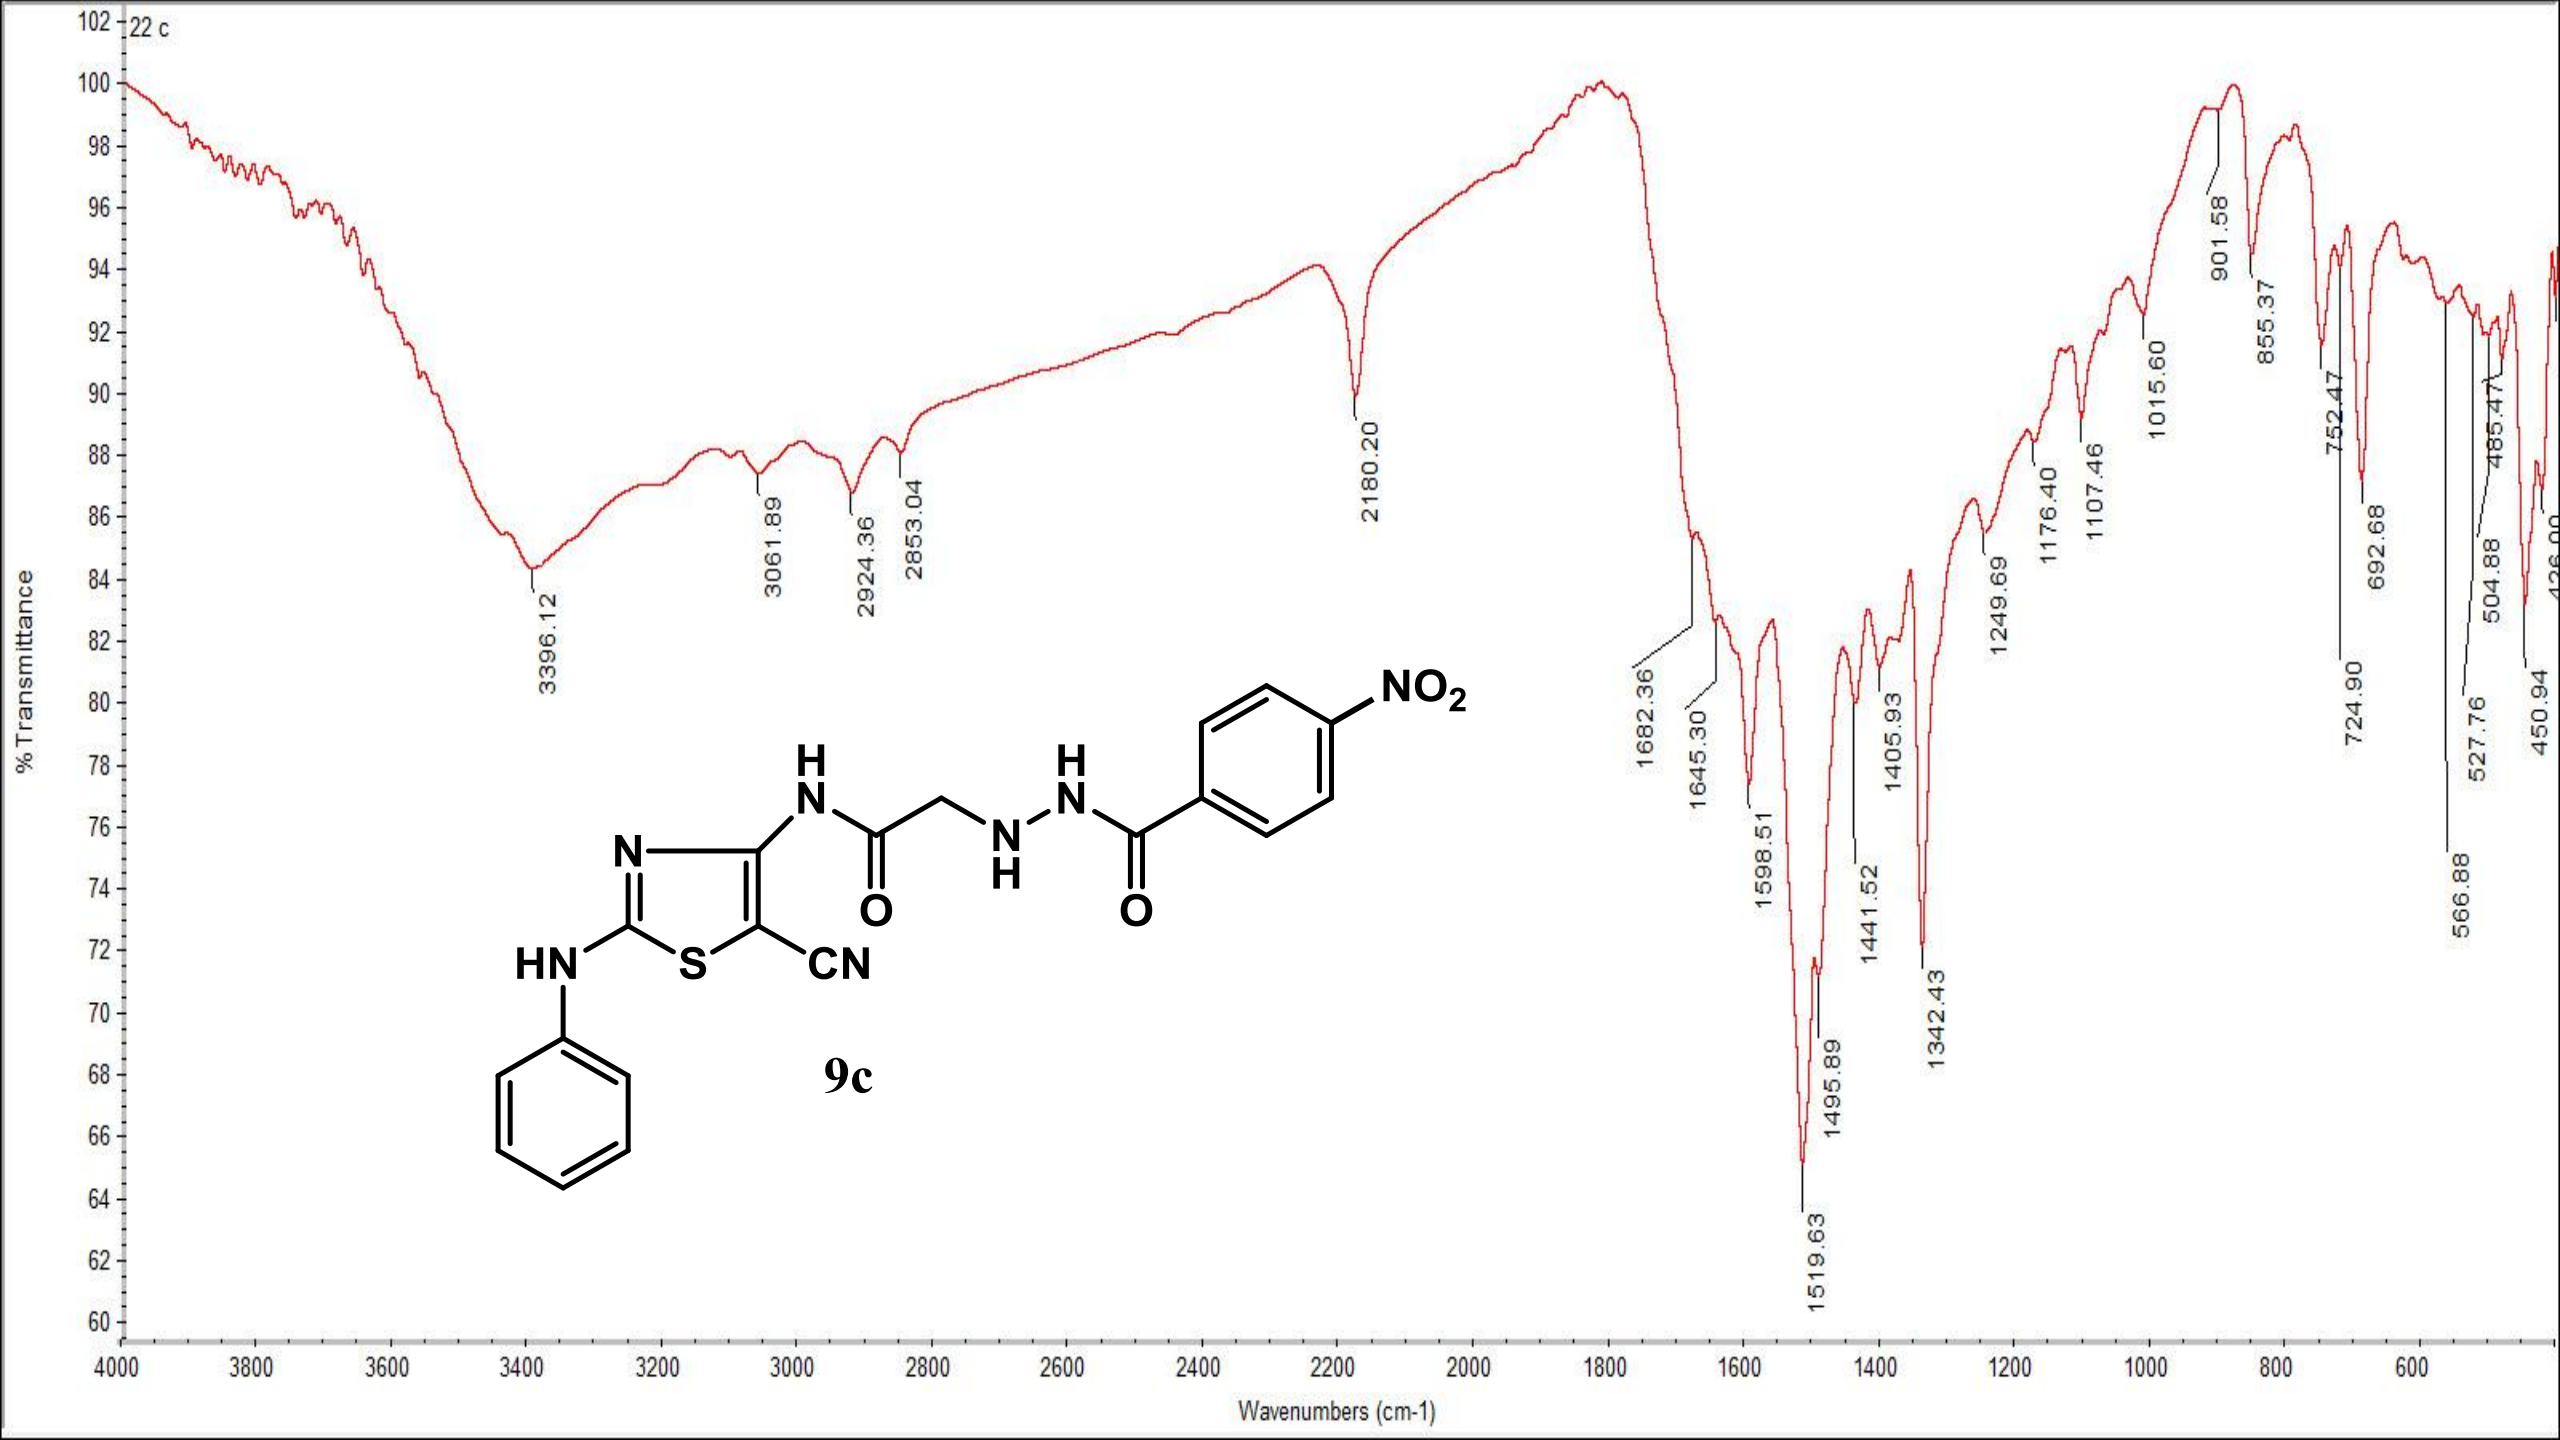



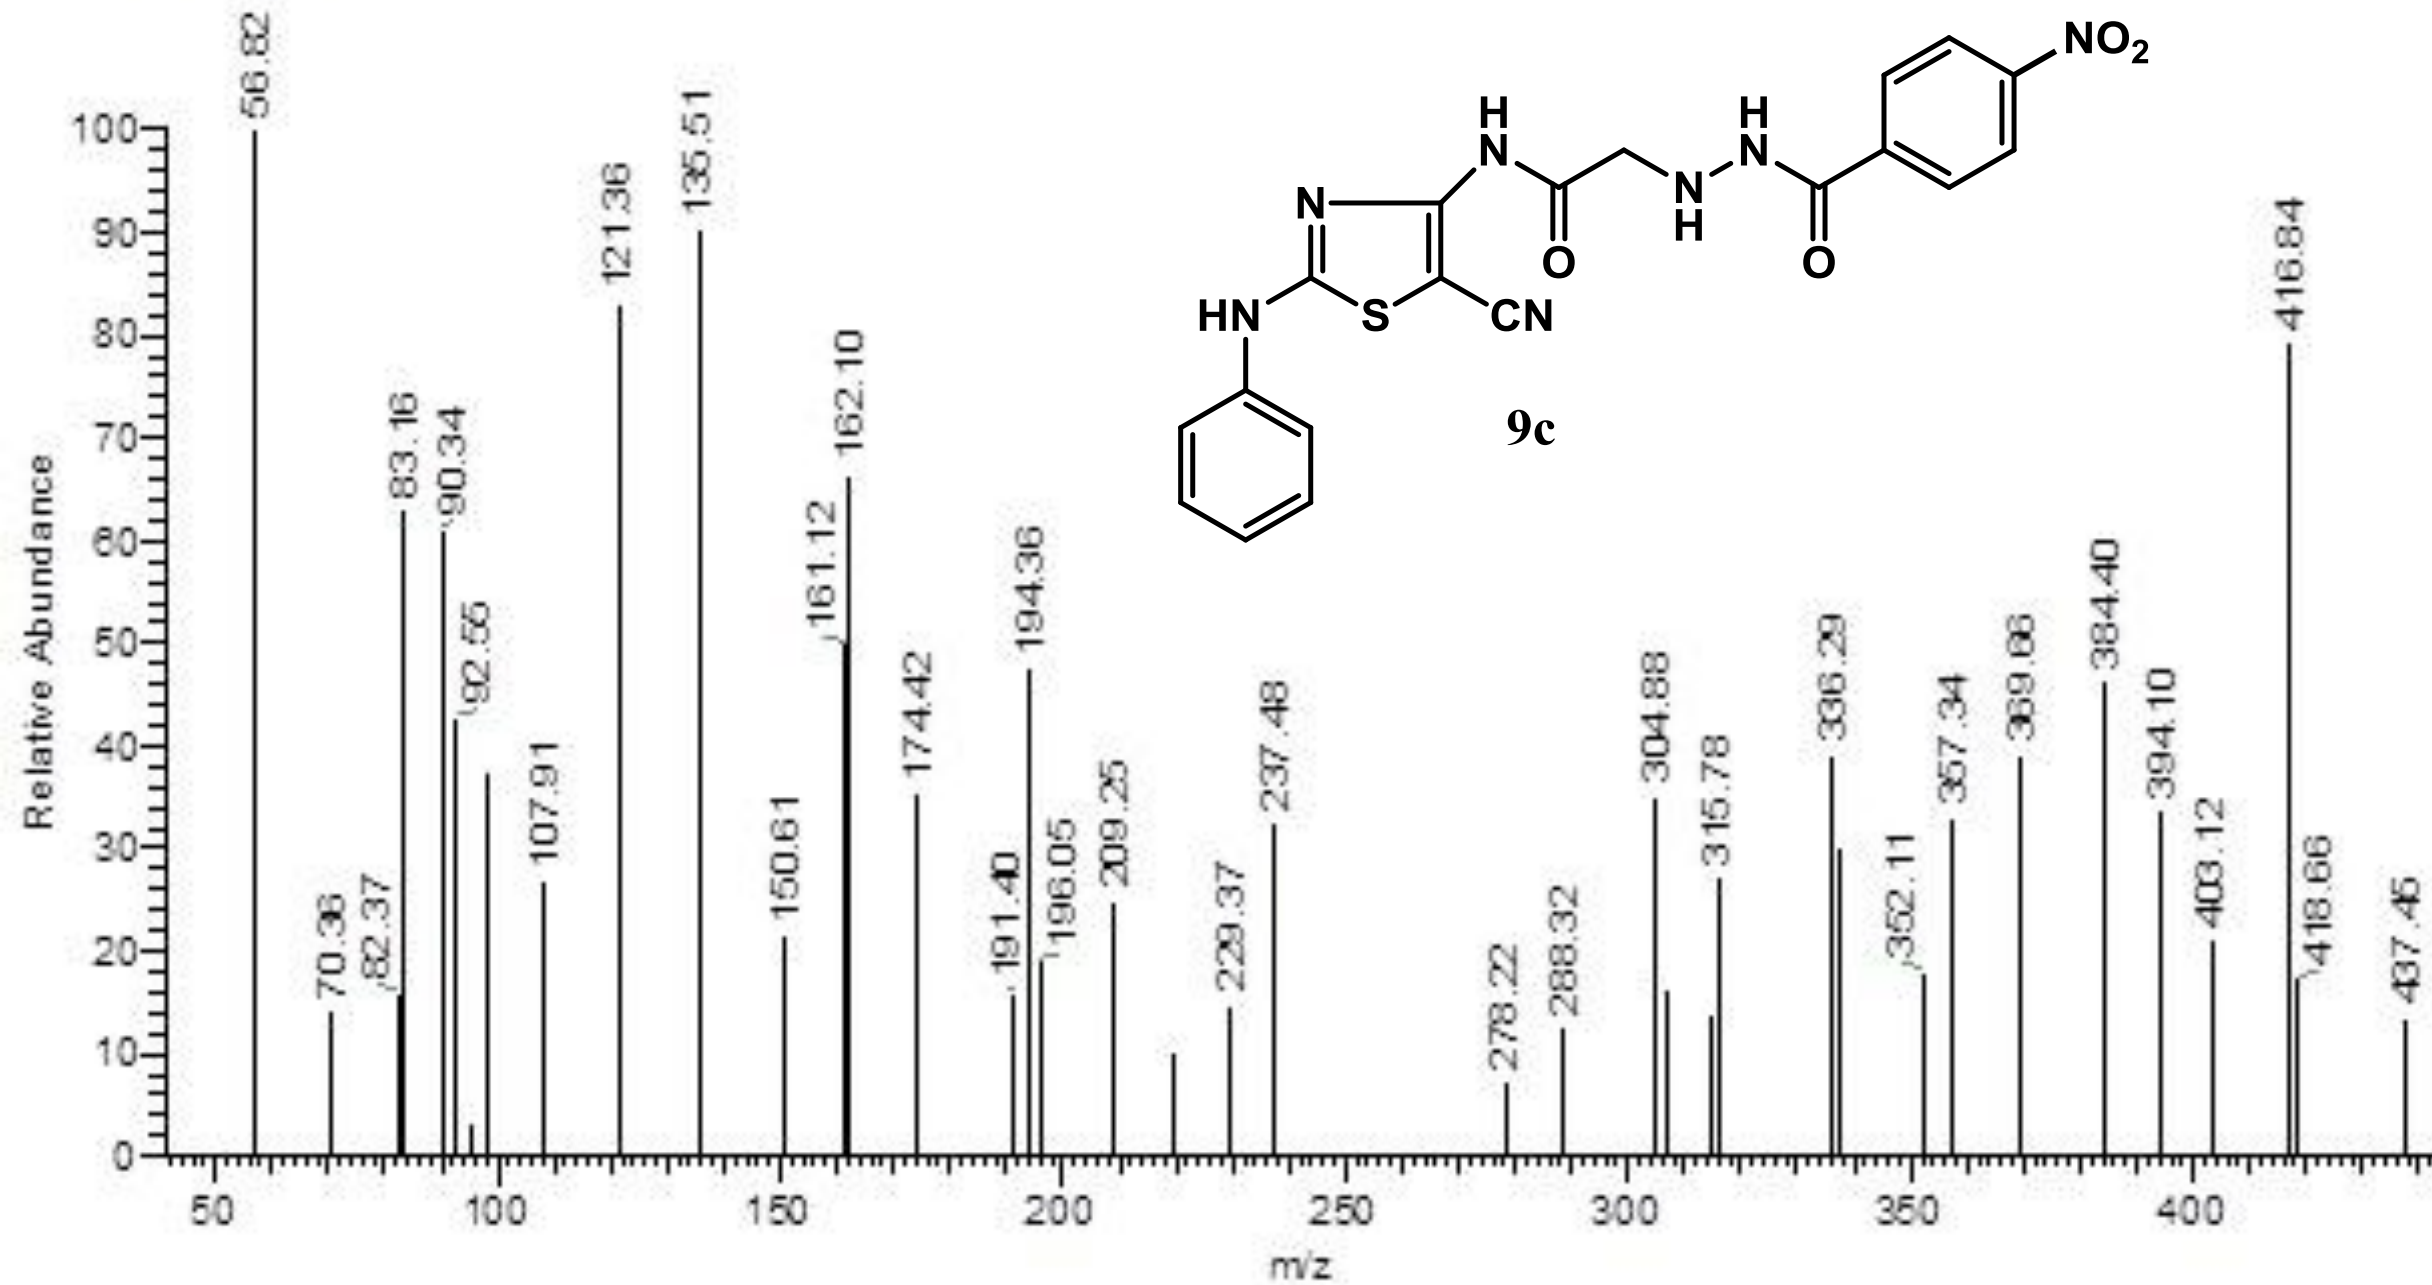

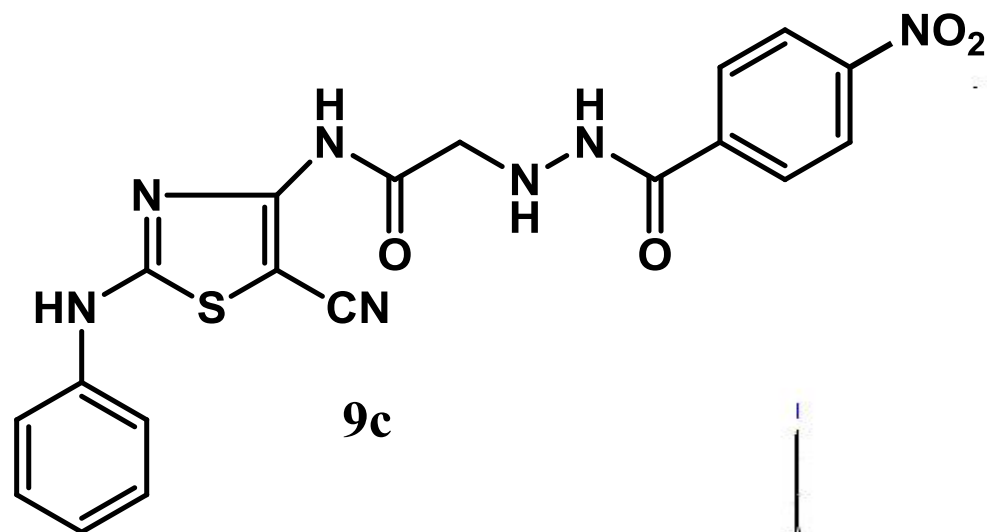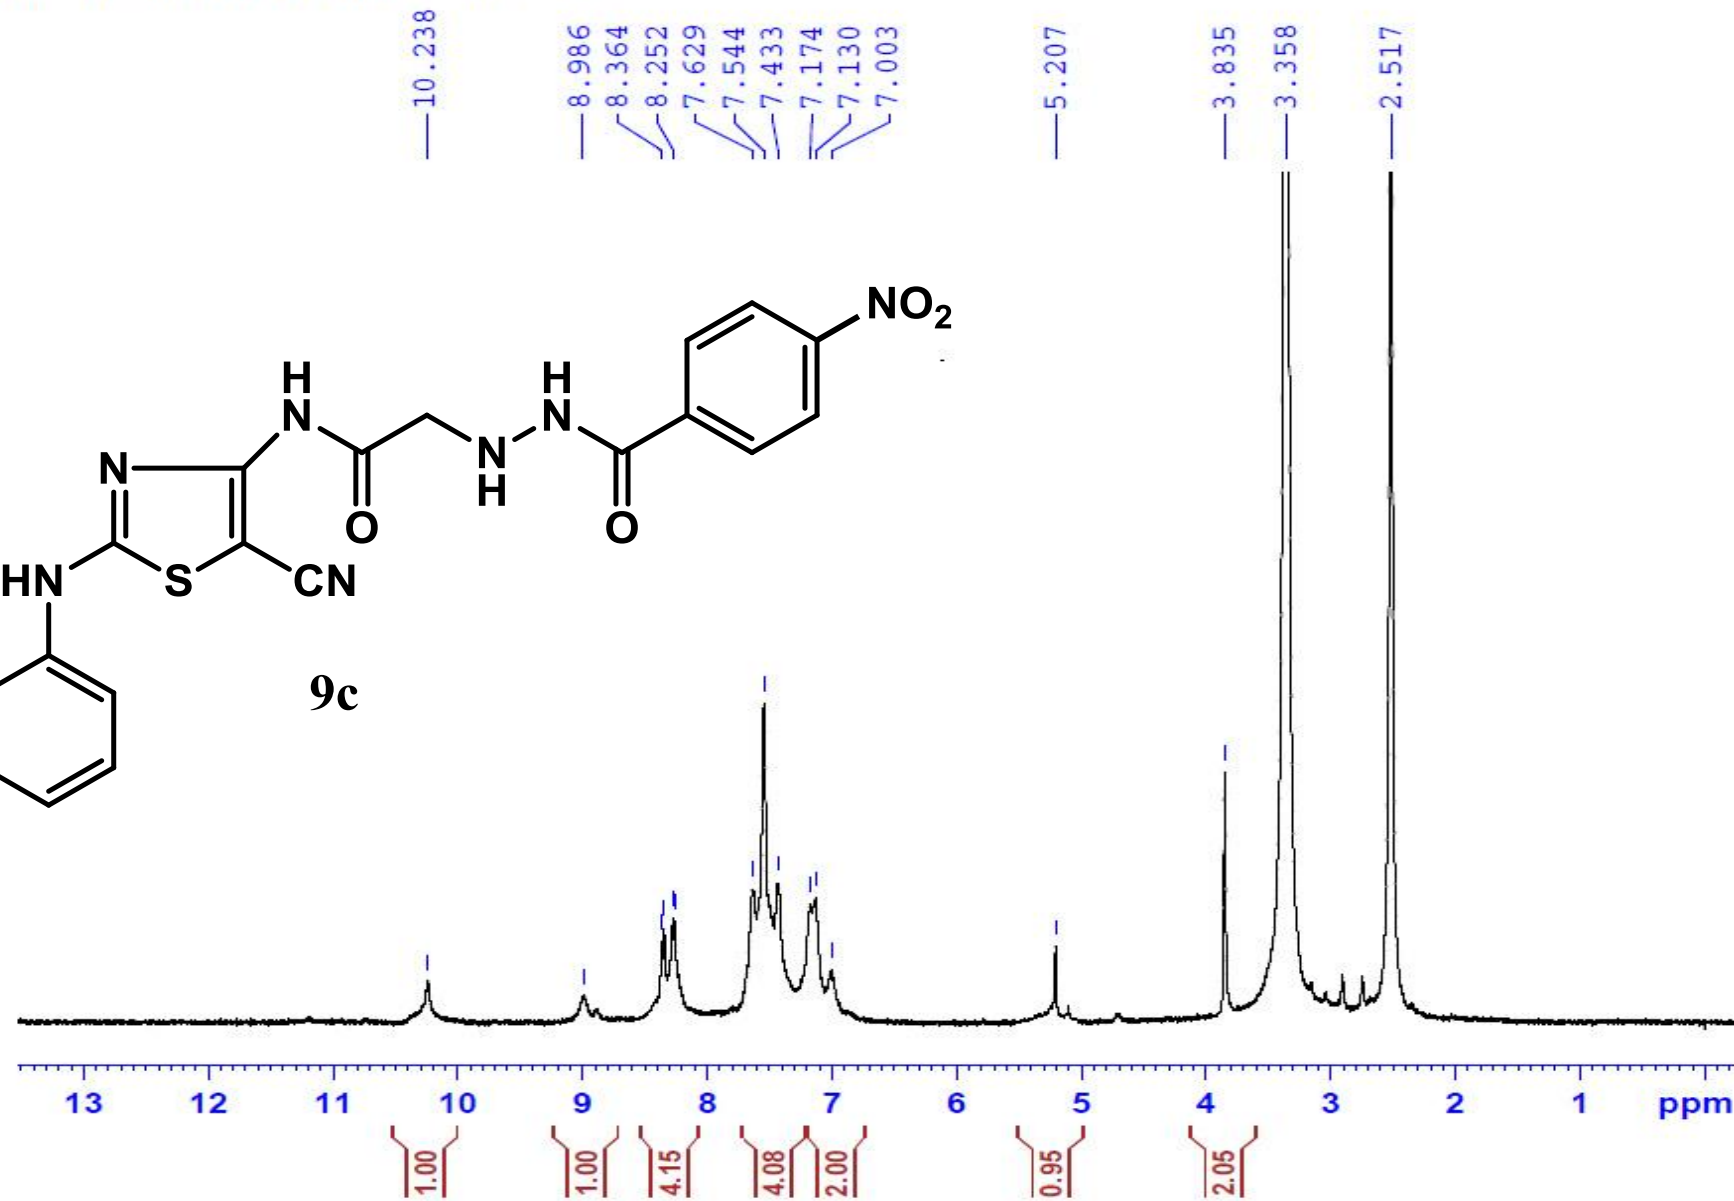

Current Data Parameters  
 NAME Alaa Abdullah-24-HNMF  
 EXPNO 10  
 PROCNO 1

F2 - Acquisition Parameters  
 Date\_ 20220510  
 Time\_ 15.28 h  
 INSTRUM spect  
 PROBHD Z108618\_0945 (  
 PULPROG zg30  
 TD 65536  
 SOLVENT DMSO  
 NS 16  
 DS 2  
 SWH 8012.820 Hz  
 FIDRES 0.244532 Hz  
 AQ 4.0894465 sec  
 RG 197.77  
 DW 62.400 usec  
 DE 6.50 usec  
 TE 295.4 K  
 D1 1.00000000 sec  
 TD0 1  
 SFO1 400.2024712 MHz  
 NUC1 1H  
 P1 13.50 usec  
 PLW1 13.00000000 W

F2 - Processing parameters  
 SI 65536  
 SF 400.2000000 MHz  
 WDW EM  
 SSB 0  
 LB 0.30 Hz  
 GB 0  
 PC 1.00



Alaa Abdullah - 20 - C13 - T

172.7559  
165.0629  
164.9603  
153.3072  
140.2301  
135.5902  
131.0222  
129.4346  
128.4874  
124.9237  
123.3767  
118.7403  
116.8370

61.9616  
57.1310  
40.6048  
40.3960  
40.1875  
39.9787  
39.7701  
39.5614  
39.3524

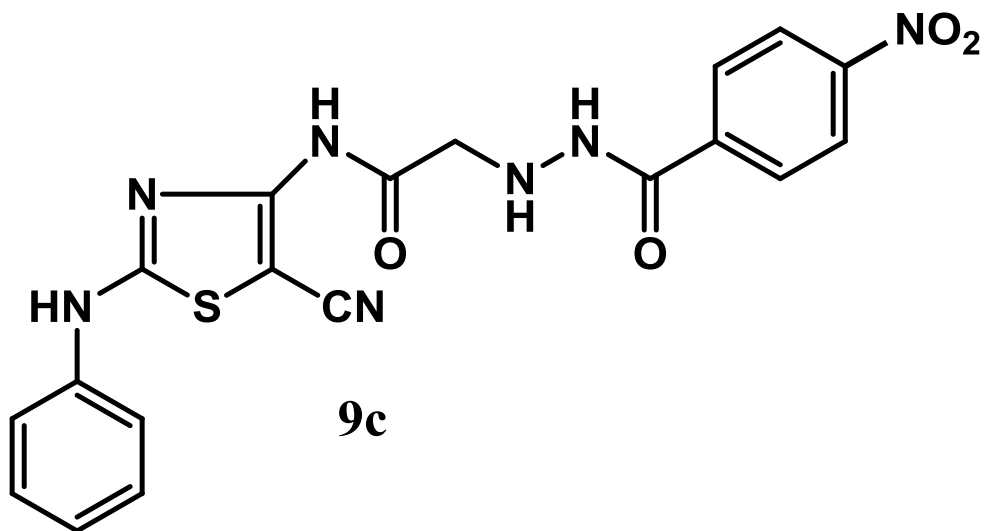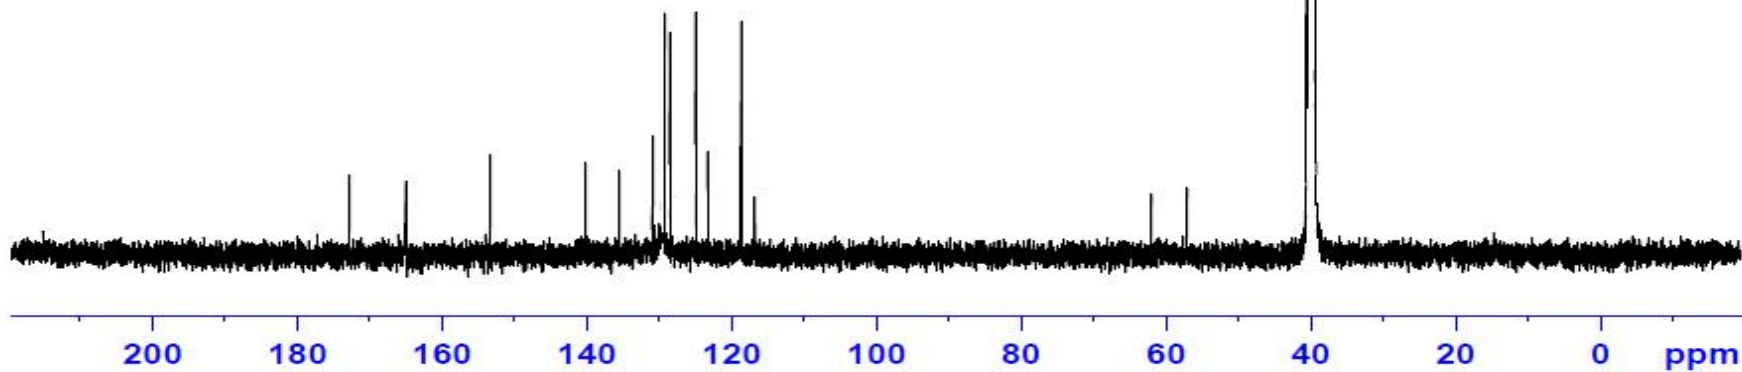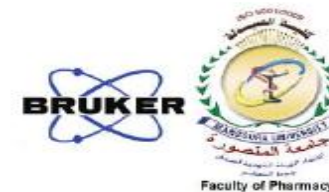

Current Data Parameters  
NAME Alaa Abdullah - 20 - C13 - T  
EXPNO 10  
PROCNO 1

F2 - Acquisition Parameters  
Date\_ 20220517  
Time 4.54 h  
INSTRUM spect  
PROBHD Z108618\_0945 ( )  
PULPROG zgpg30  
TD 65536  
SOLVENT DMSO  
NS 2100  
DS 4  
SWH 24038.461 Hz  
FIDRES 0.733596 Hz  
AQ 1.3631488 sec  
RG 197.77  
DW 20.800 usec  
DE 6.50 usec  
TE 296.3 K  
D1 2.00000000 sec  
D11 0.03000000 sec  
TDO 1  
SFO1 100.6404331 MHz  
NUC1 13C  
P1 10.00 usec  
PLW1 47.00000000 W  
SFO2 400.2016008 MHz  
NUC2 1H  
CPDPRG2 waltz16  
PCPD2 90.00 usec  
PLW2 13.00000000 W  
PLW12 0.29249999 W  
PLW13 0.14713000 W

F2 - Processing parameters  
SI 32768  
SF 100.6303700 MHz  
WDW EM  
SSB 0  
LB 1.00 Hz  
GB 0  
PC 1.40

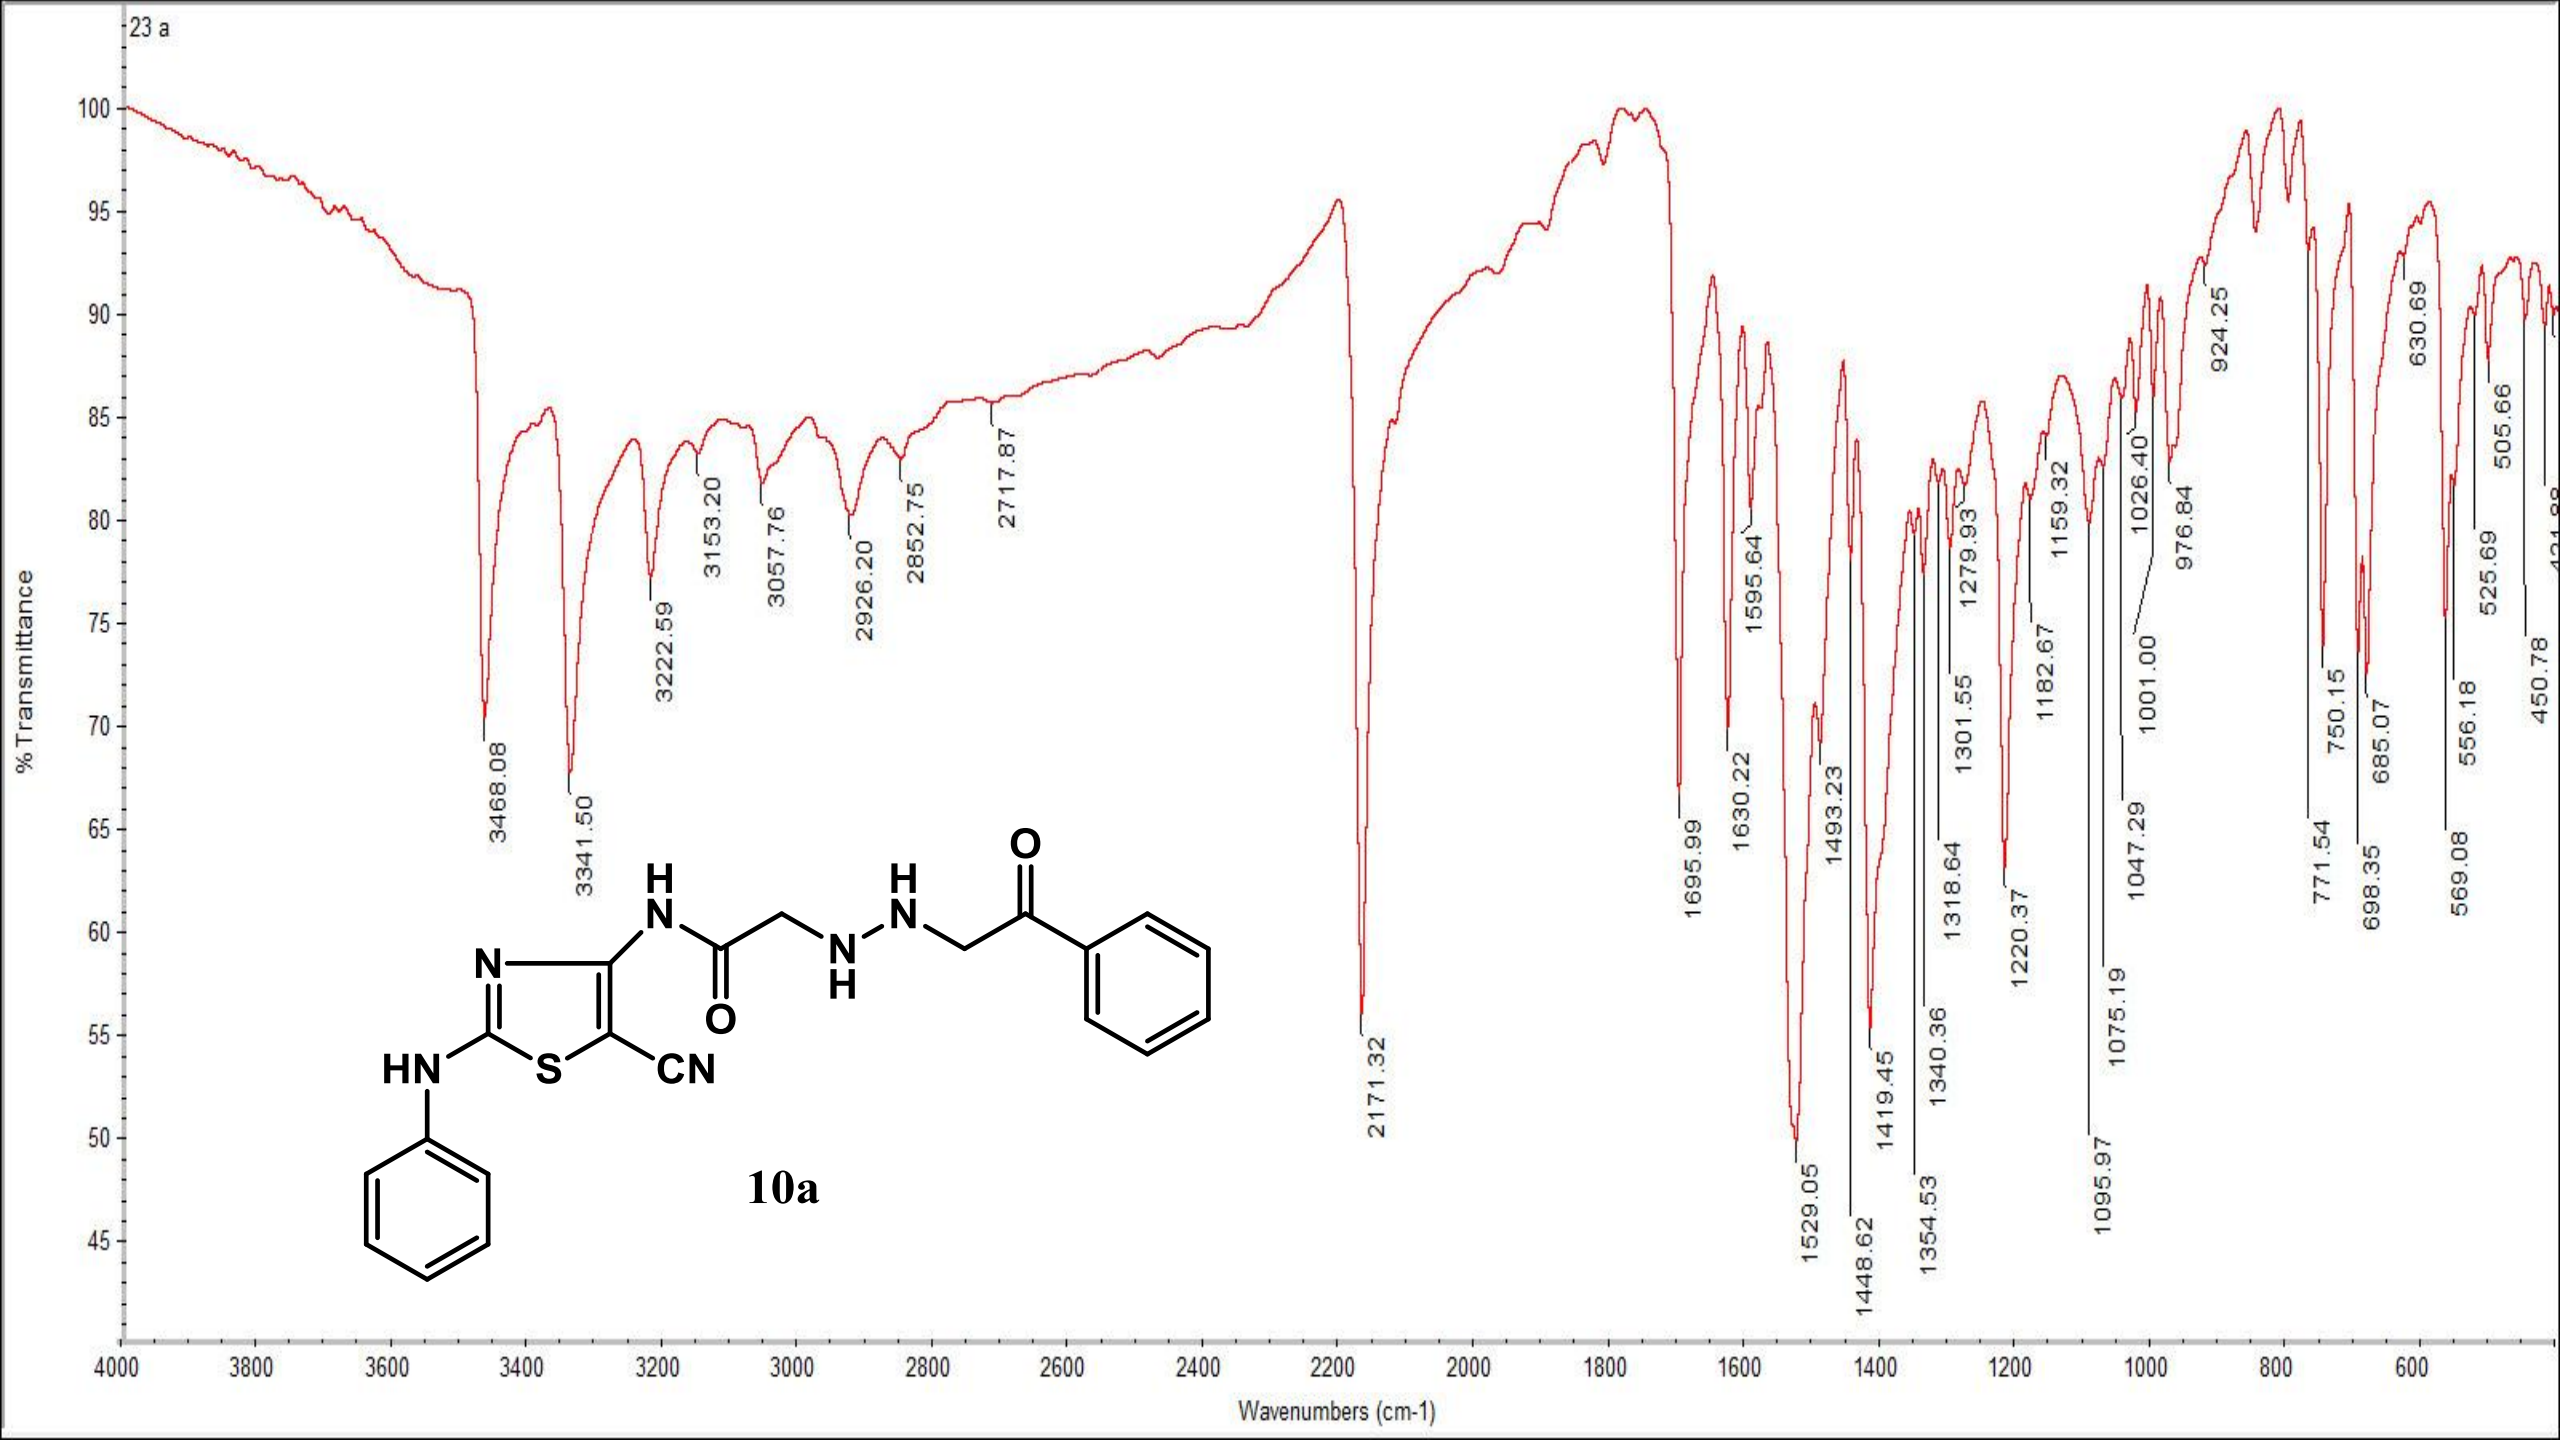

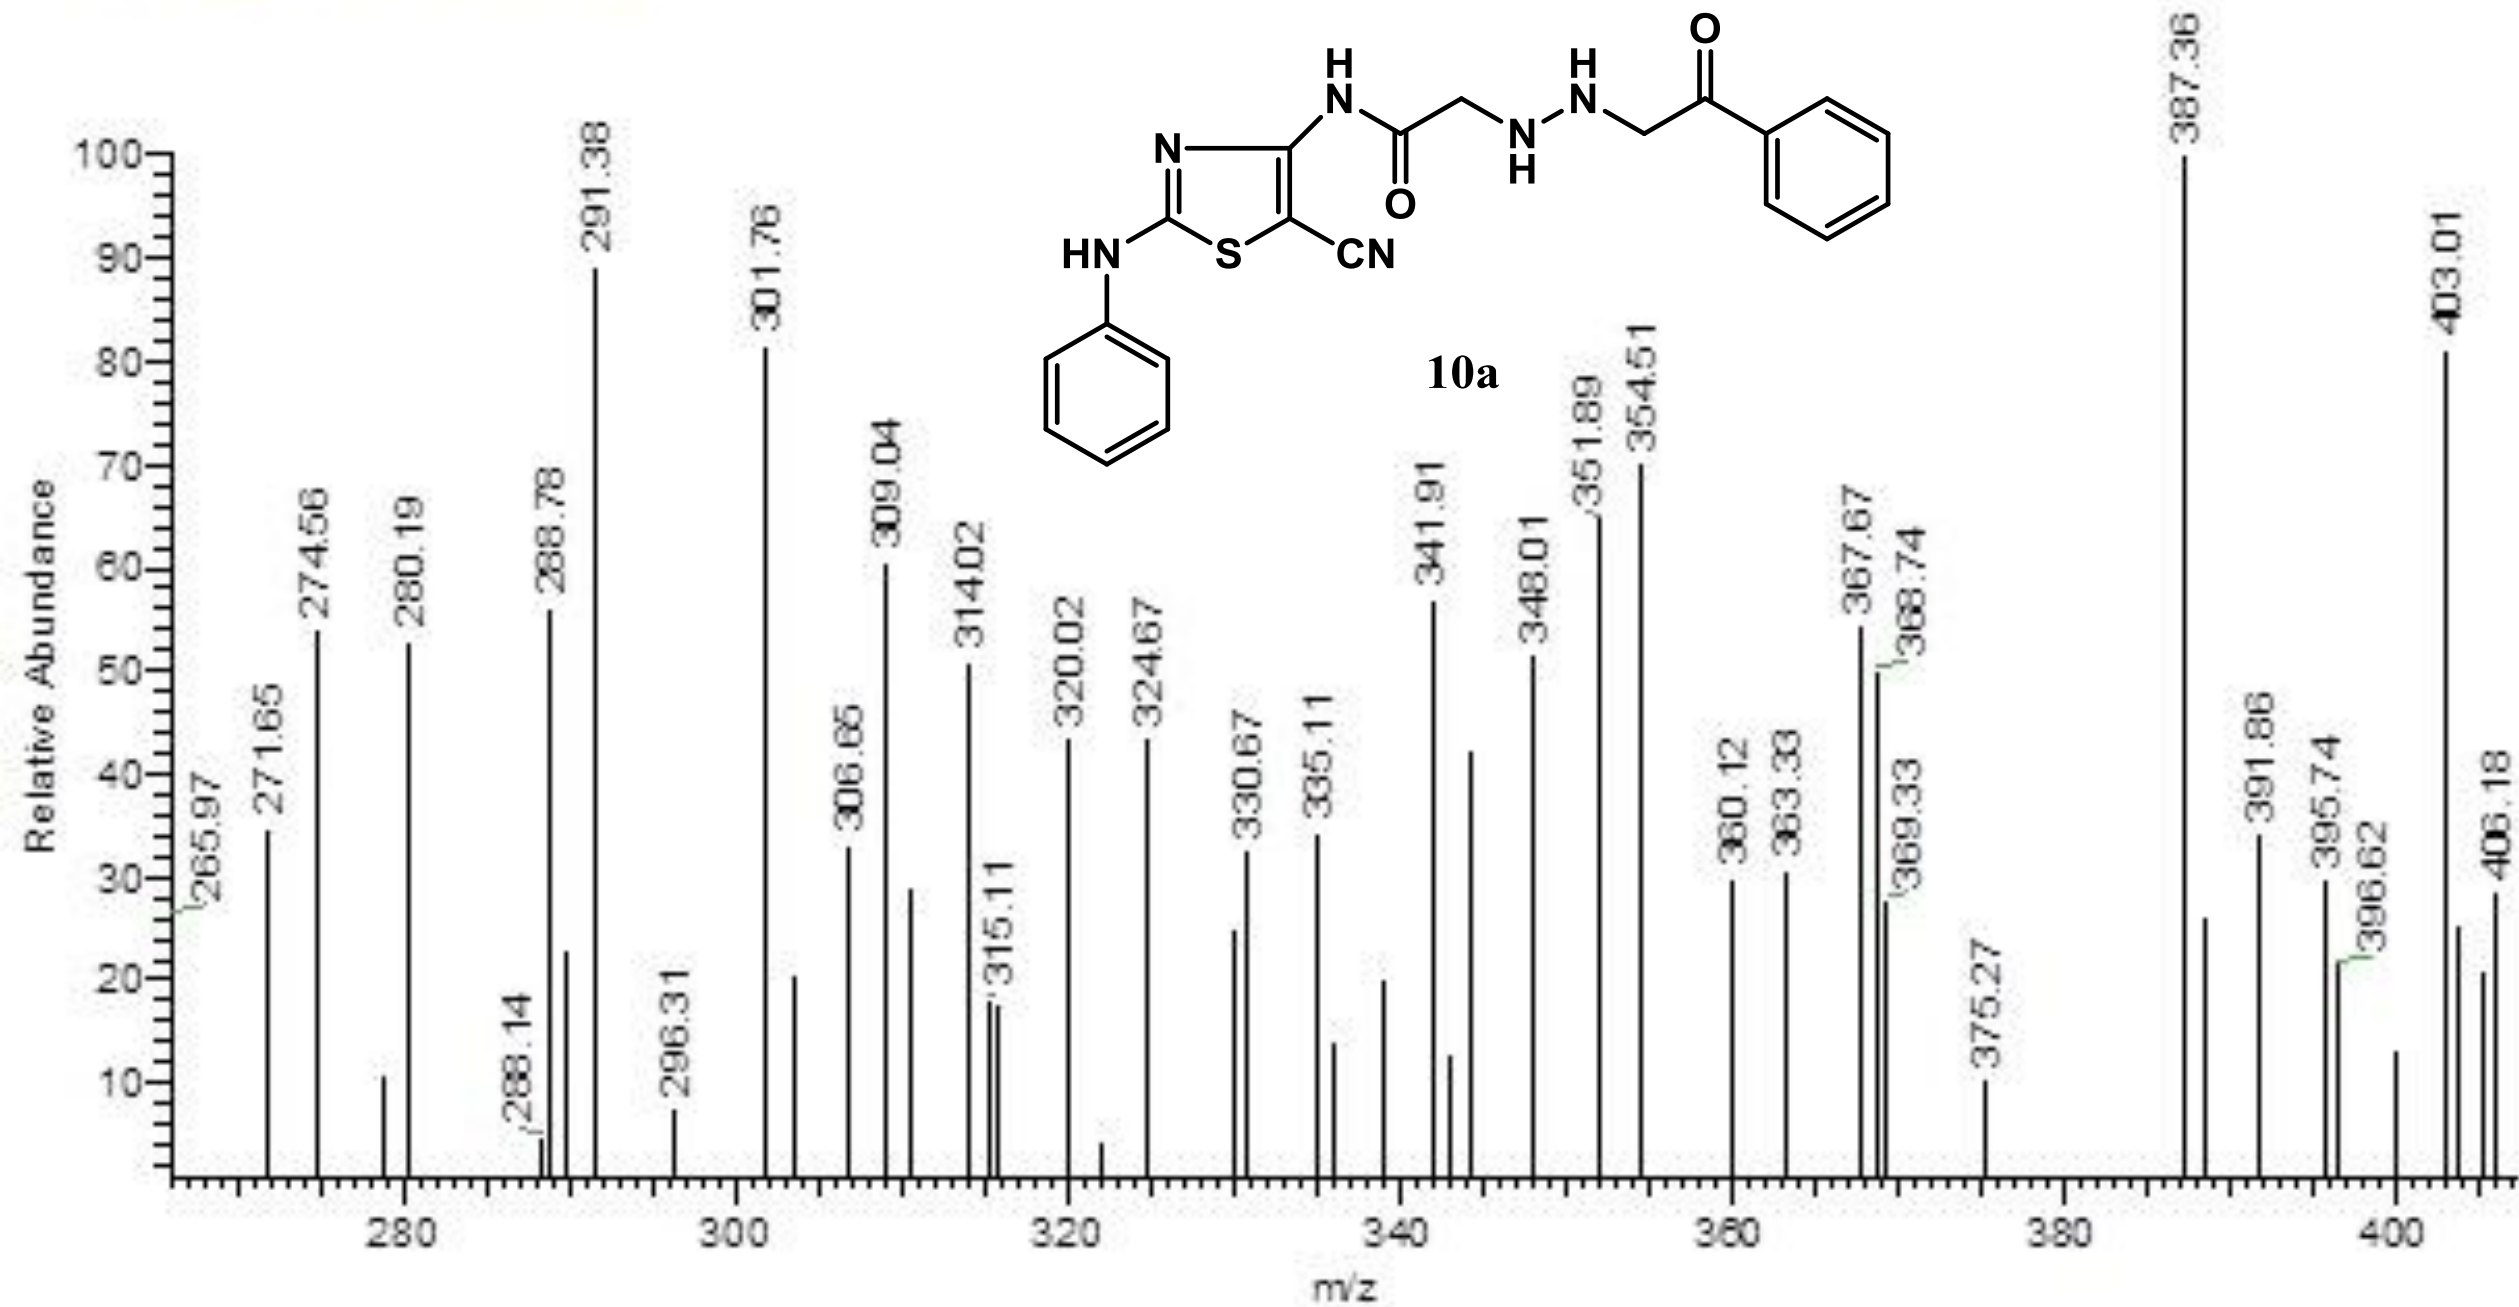

Alaa Abdallah-ClAcl+PhCl-AS-proton

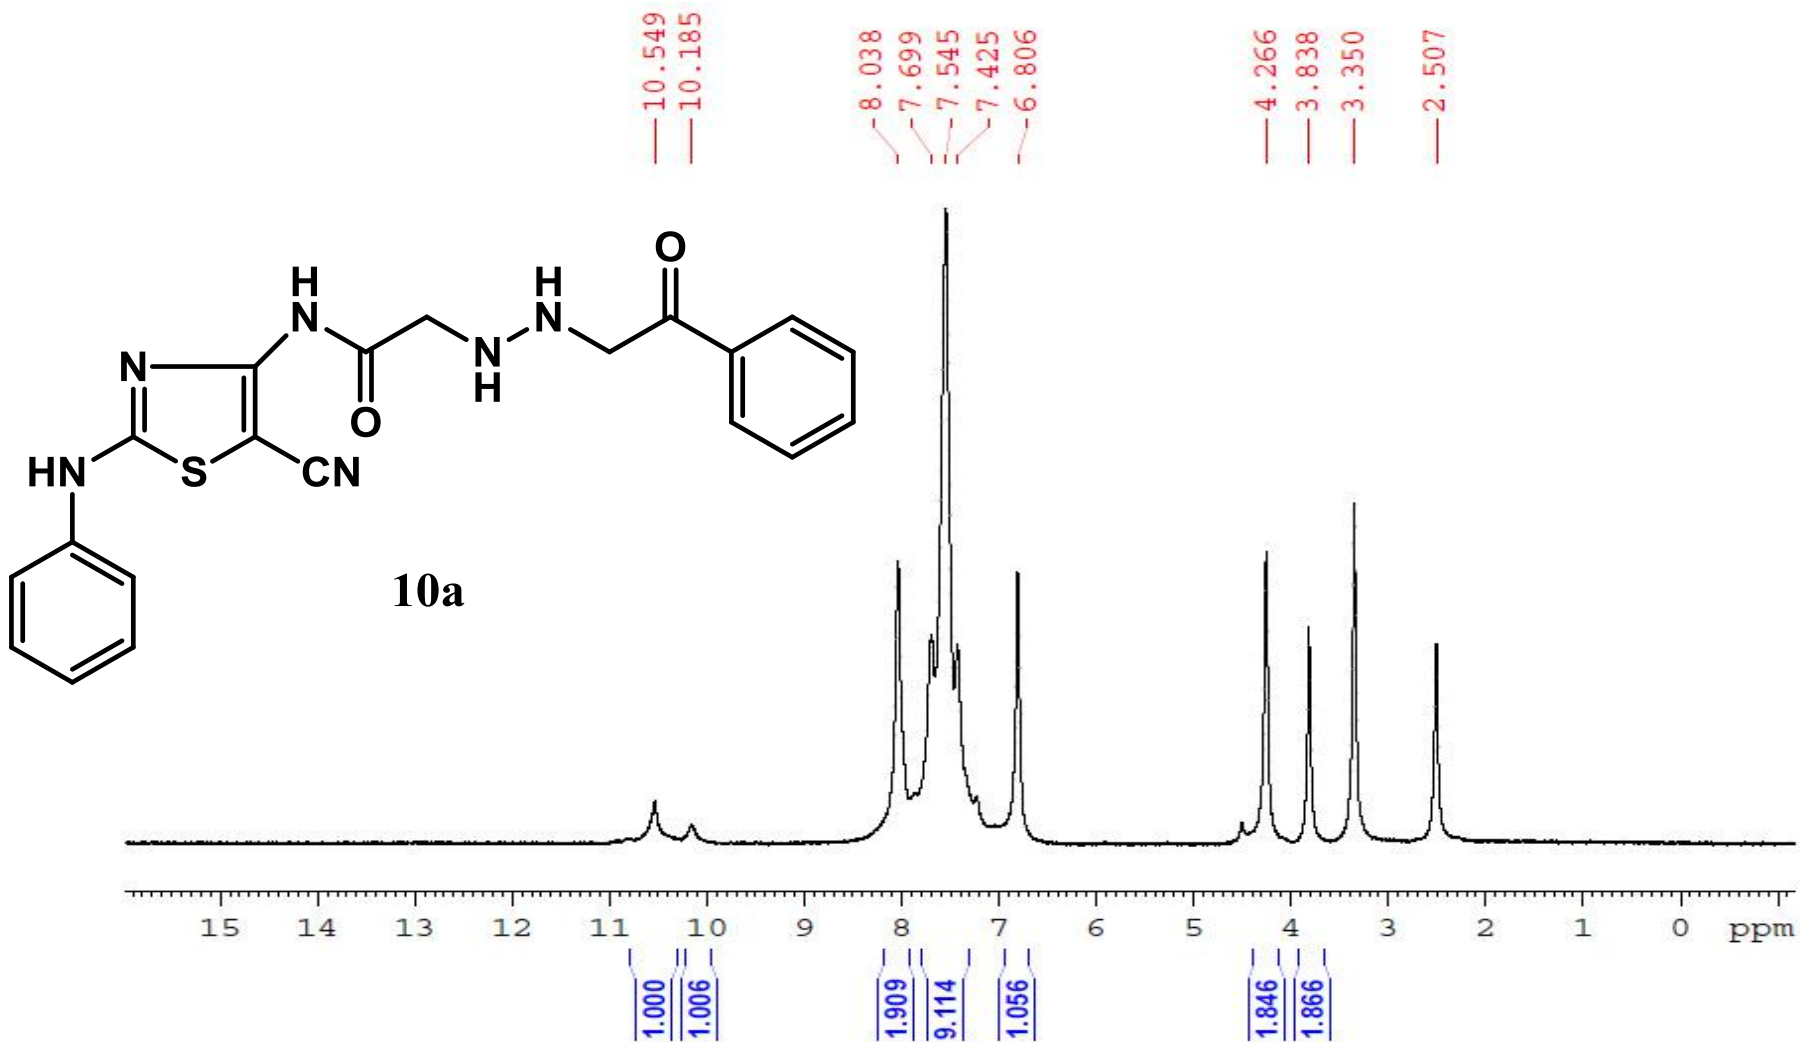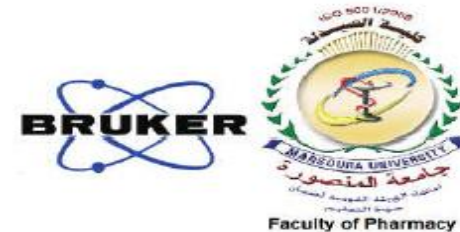

Current Data Parameters  
NAME Alaa Abdallah-ClAcl+PhCl-AS-proton  
EXPNO 10  
PROCNO 1

F2 - Acquisition Parameters  
Date\_ 20210815  
Time\_ 9.37 h  
INSTRUM spect  
PROBHD Z108618\_0945 (  
PULPROG zg30  
TD 65536  
SOLVENT DMSO  
NS 16  
DS 2  
SWH 8012.820 Hz  
FIDRES 0.244532 Hz  
AQ 4.0894465 sec  
RG 158.72  
DW 62.400 usec  
DE 6.50 usec  
TE 295.5 K  
D1 1.00000000 sec  
TDO 1  
SFO1 400.2024712 MHz  
NUC1 1H  
P1 13.50 usec  
PLW1 13.00000000 W

F2 - Processing parameters  
SI 65536  
SF 400.2000000 MHz  
WDW EM  
SSB 0  
LB 0.30 Hz  
GB 0  
PC 1.00

Alaa Abdallah-cl.Acl+ph.cl-carbon-WH

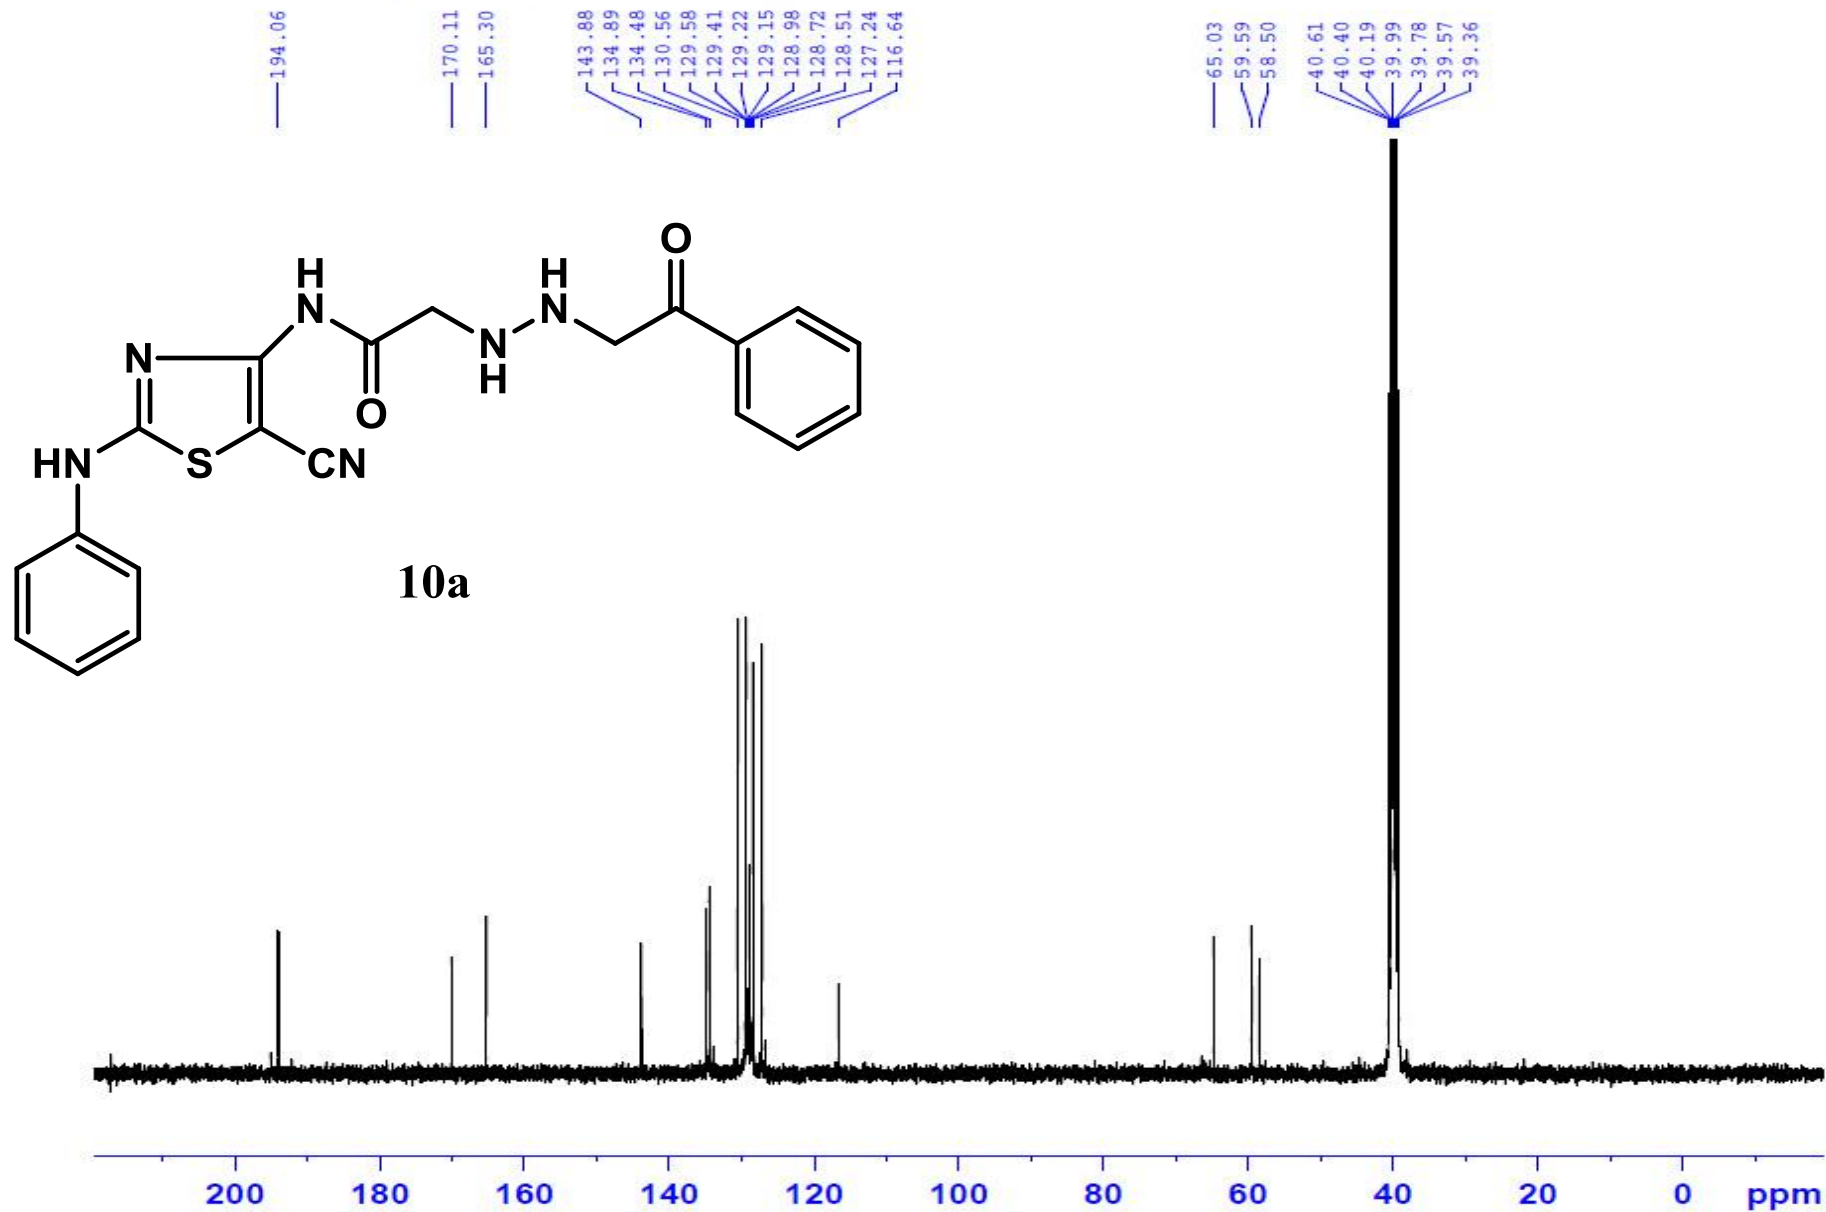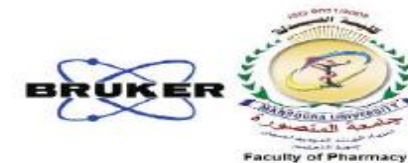

Current Data Parameters  
NAME Alaa Abdallah-cl.Acl+ph.cl-carbon-WH  
EXPNO 10  
PROCNO 1

F2 - Acquisition Parameters  
Date\_ 20210902  
Time\_ 22.22 h  
INSTRUM spect  
PROBHD Z108618\_0945 ( )  
PULPROG zgpg30  
TD 65536  
SOLVENT DMSO  
NS 2220  
DS 4  
SWH 24038.461 Hz  
FIDRES 0.733596 Hz  
AQ 1.3631488 sec  
RG 197.77  
DW 20.800 usec  
DE 6.50 usec  
TE 298.4 K  
D1 2.00000000 sec  
D11 0.03000000 sec  
TD0 1  
SFO1 100.6404331 MHz  
NUC1 13C  
P1 10.00 usec  
PLW1 47.00000000 W  
SFO2 400.2016008 MHz  
NUC2 1H  
CPDPRG[2] waltz16  
PCPD2 90.00 usec  
PLW2 13.00000000 W  
PLW12 0.29249999 W  
PLW13 0.14713000 W

F2 - Processing parameters  
SI 32768  
SF 100.6303700 MHz  
WDW EM  
SSB 0  
LB 1.00 Hz  
GB 0  
PC 1.40



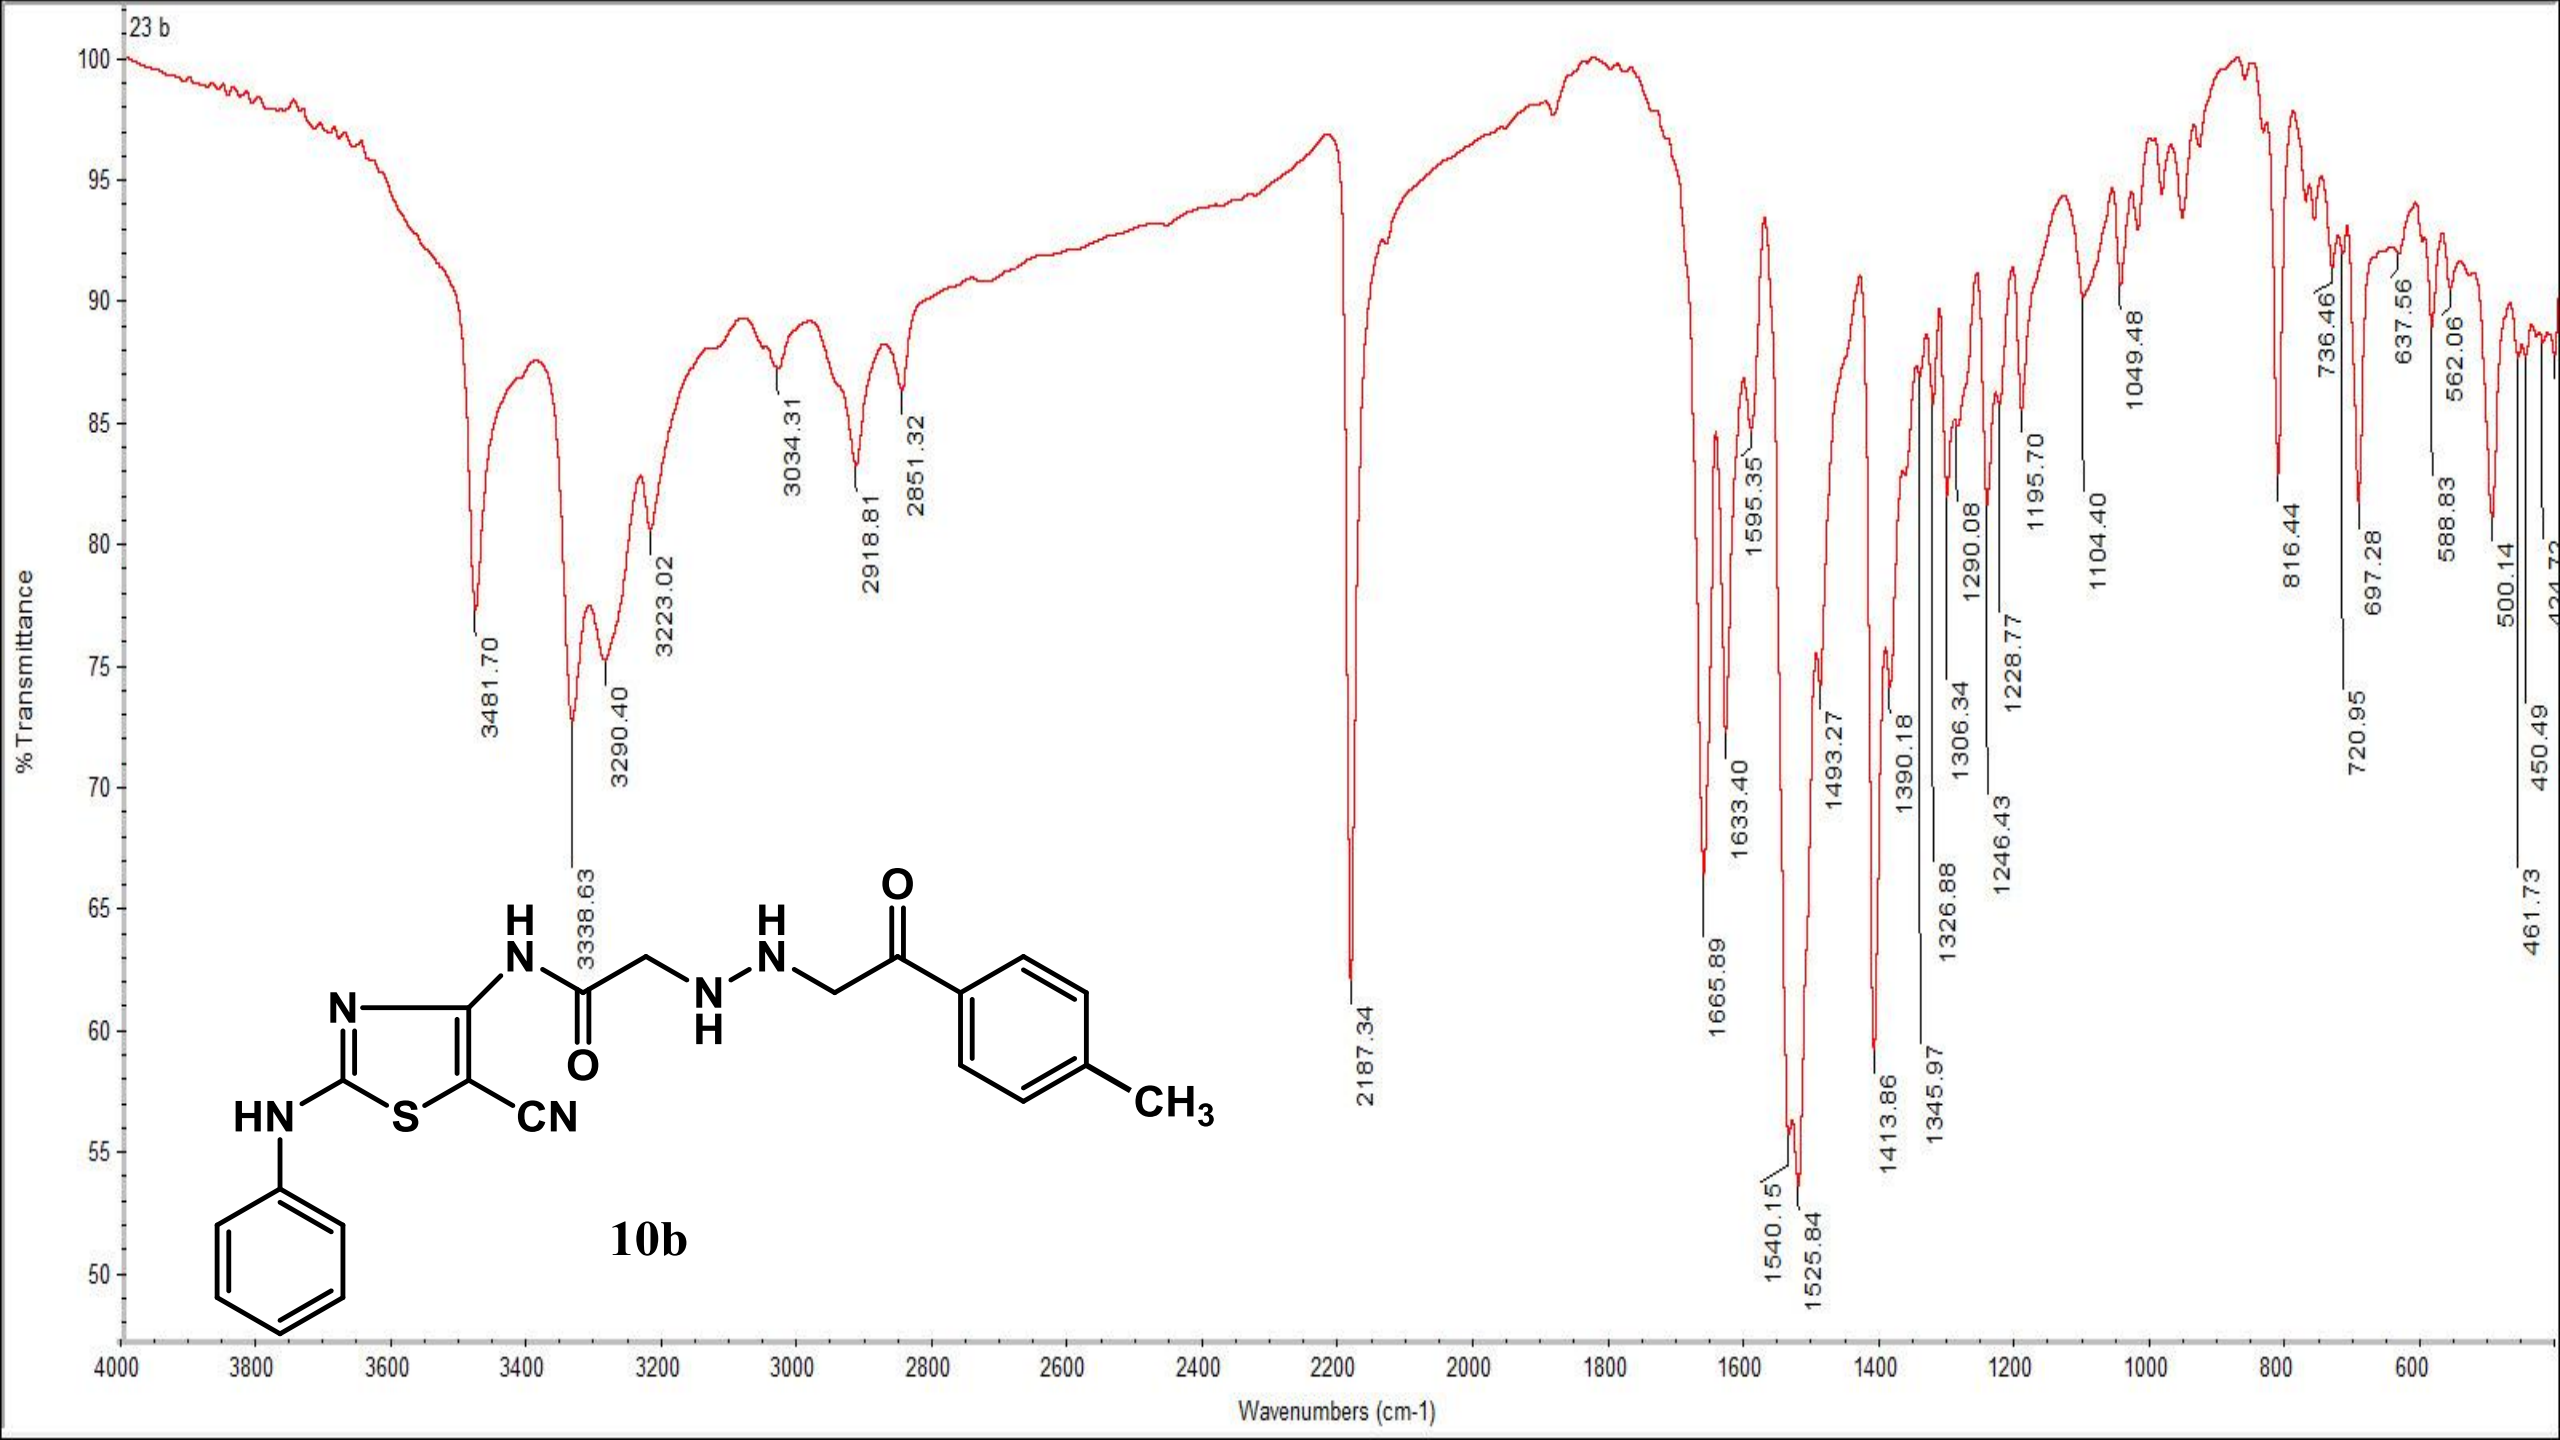

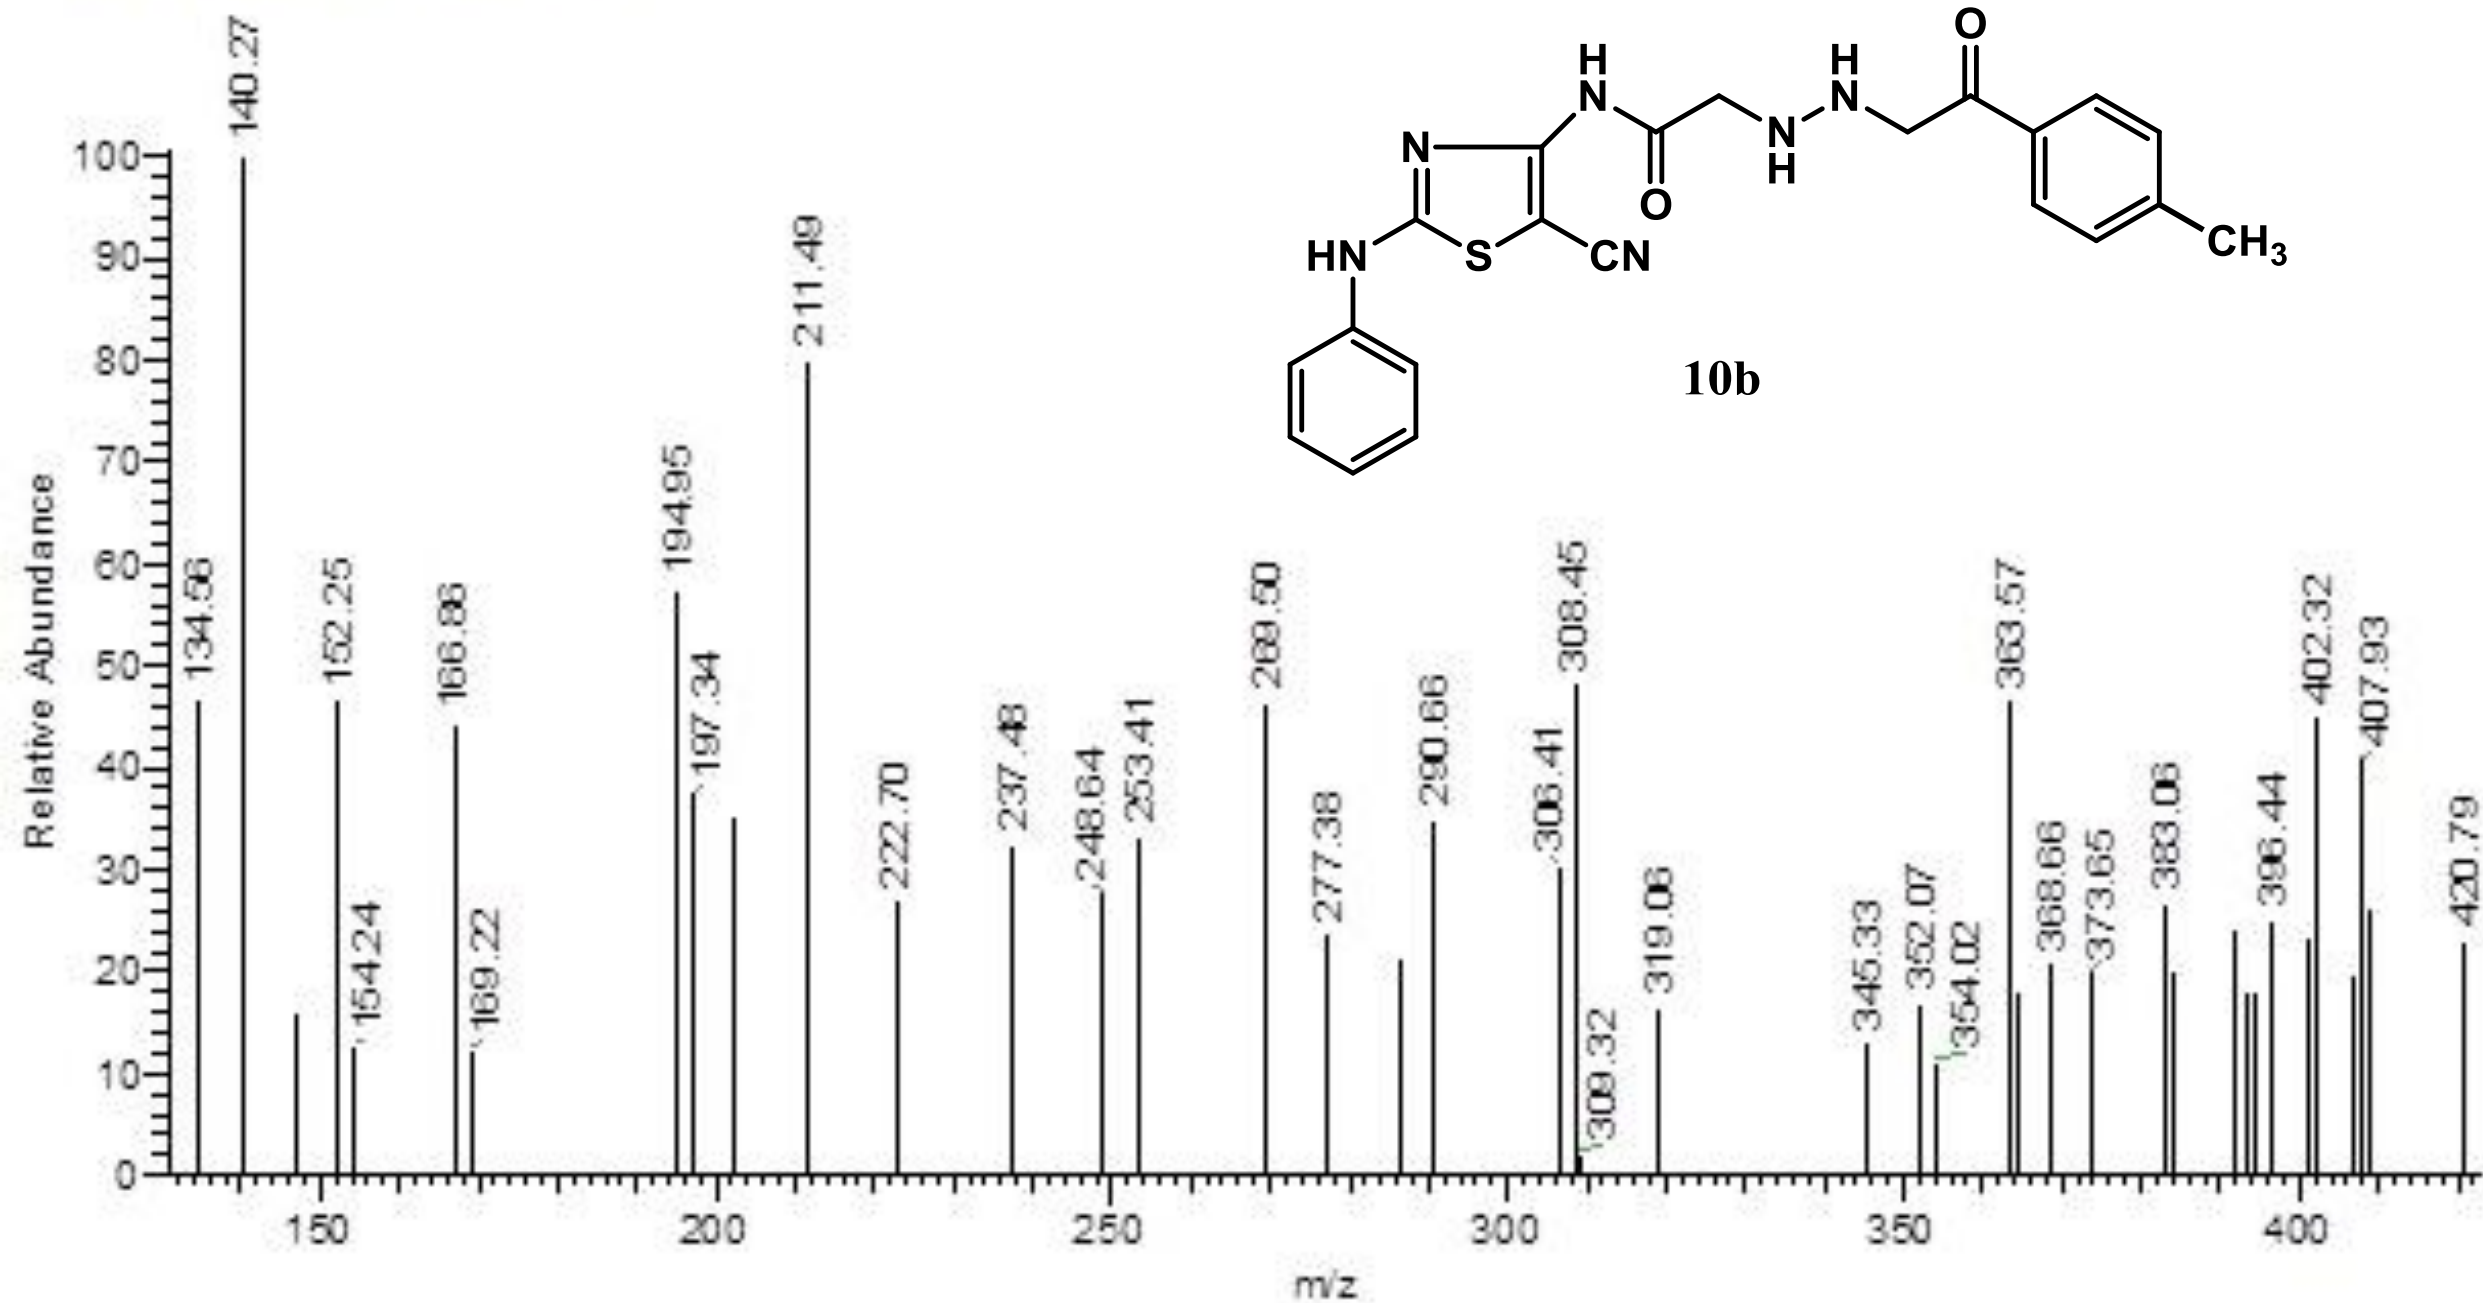



Alaa Abdallah - 23(2) - Hnmr - T

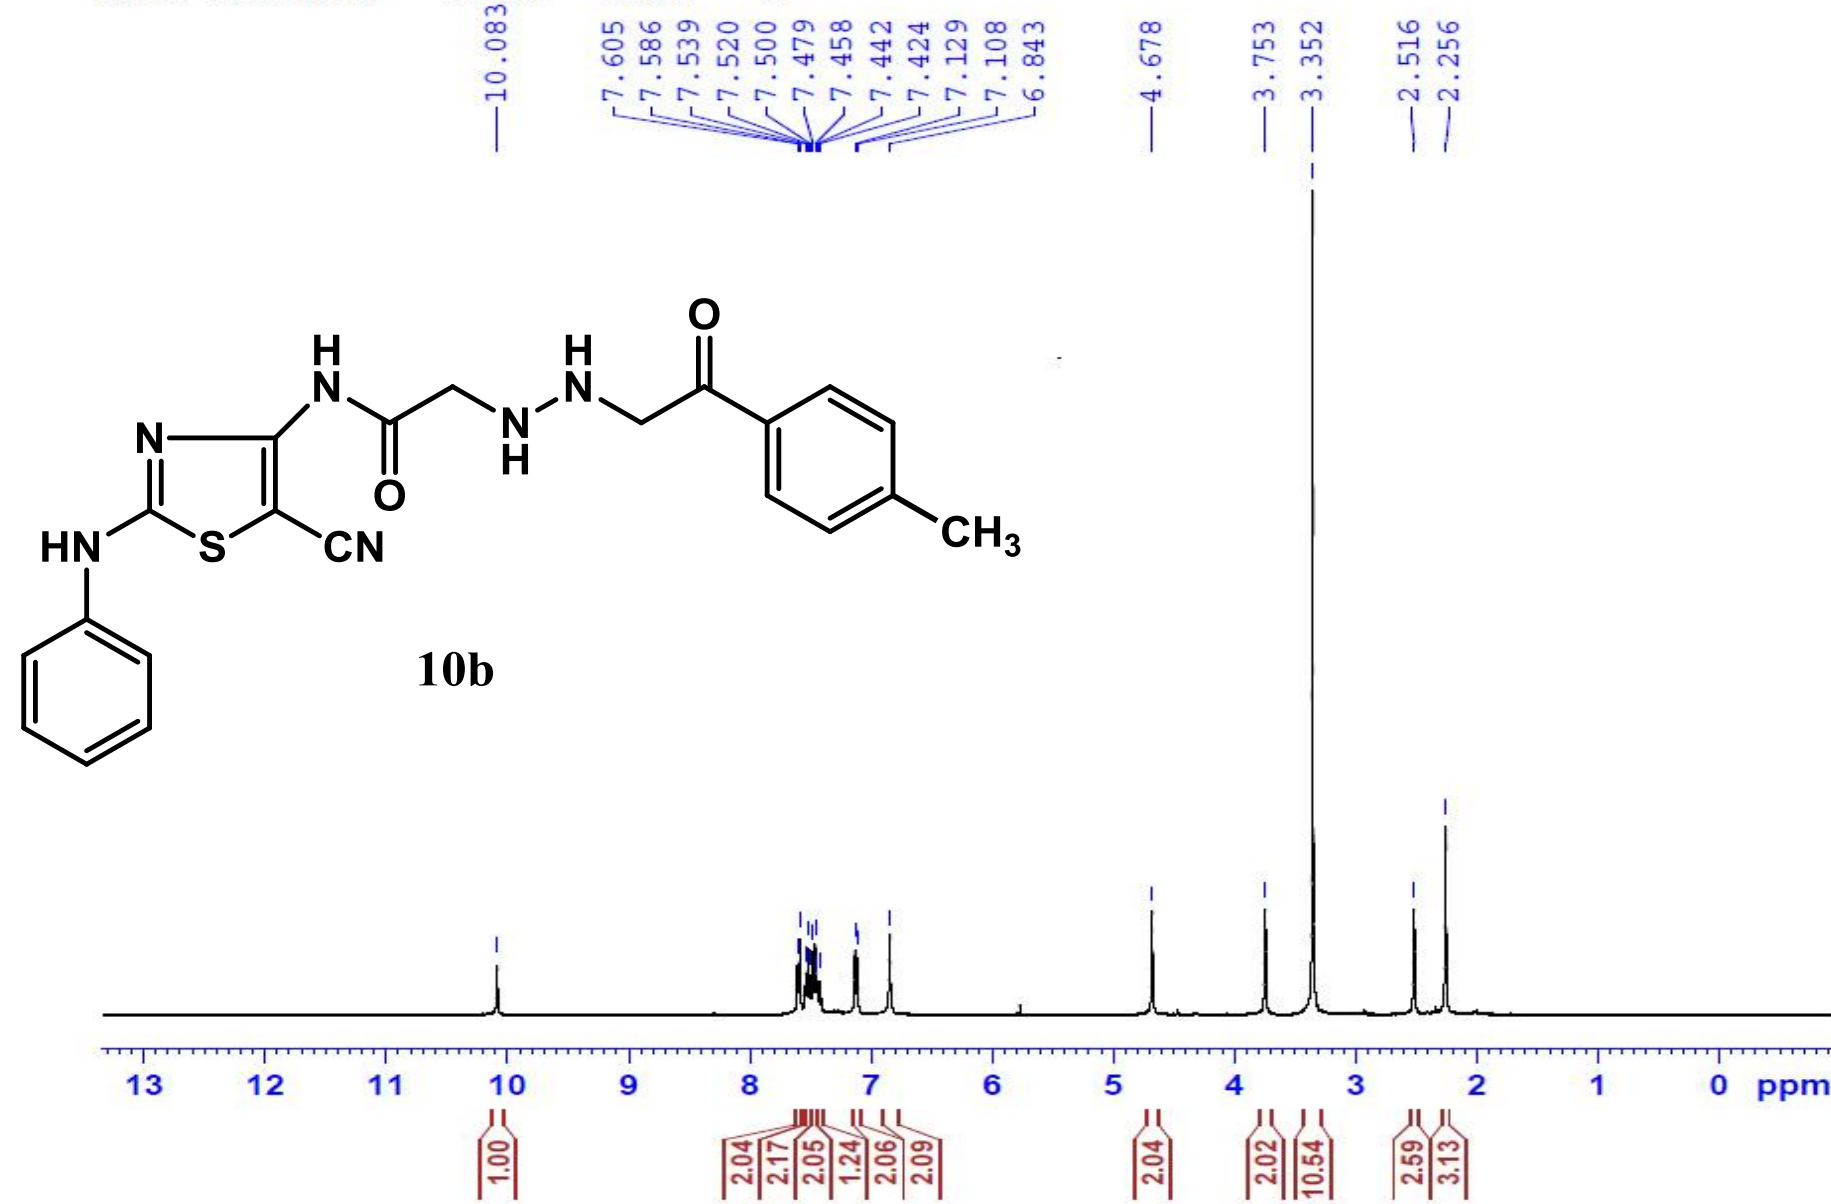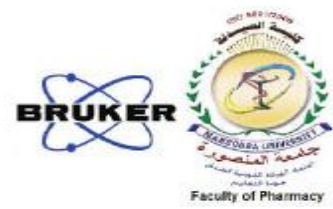

Current Data Parameters  
NAME Alaa Abdallah - 23(2) - Hnmr - T  
EXPNO 10  
PROCNO 1

F2 - Acquisition Parameters  
Date\_ 20220528  
Time 22.25 h  
INSTRUM spect  
PROBHD Z108618\_0945 (   
PULPROG zg30  
TD 65536  
SOLVENT DMSO  
NS 16  
DS 2  
SWH 8012.820 Hz  
FIDRES 0.244532 Hz  
AQ 4.0894465 sec  
RG 158.72  
DW 62.400 usec  
DE 6.50 usec  
TE 297.4 K  
D1 1.00000000 sec  
TDO 1  
SFO1 400.2024712 MHz  
NUC1 1H  
P1 13.50 usec  
PLW1 13.00000000 W

F2 - Processing parameters  
SI 65536  
SF 400.2000000 MHz  
WDW EM  
SSB 0  
LB 0.30 Hz  
GB 0  
PC 1.00

7.605  
7.586  
7.539  
7.520  
7.500  
7.479  
7.458  
7.442  
7.424  
7.406

7.129  
7.108

6.843

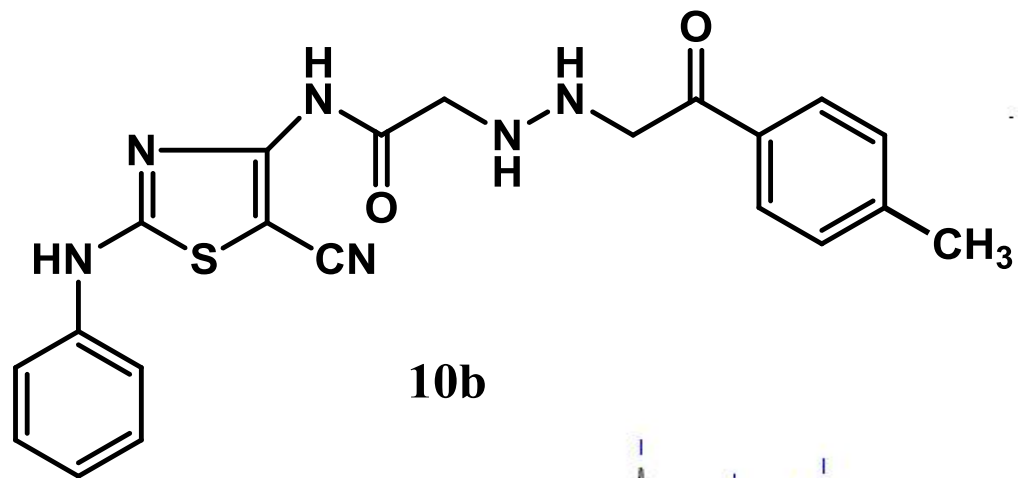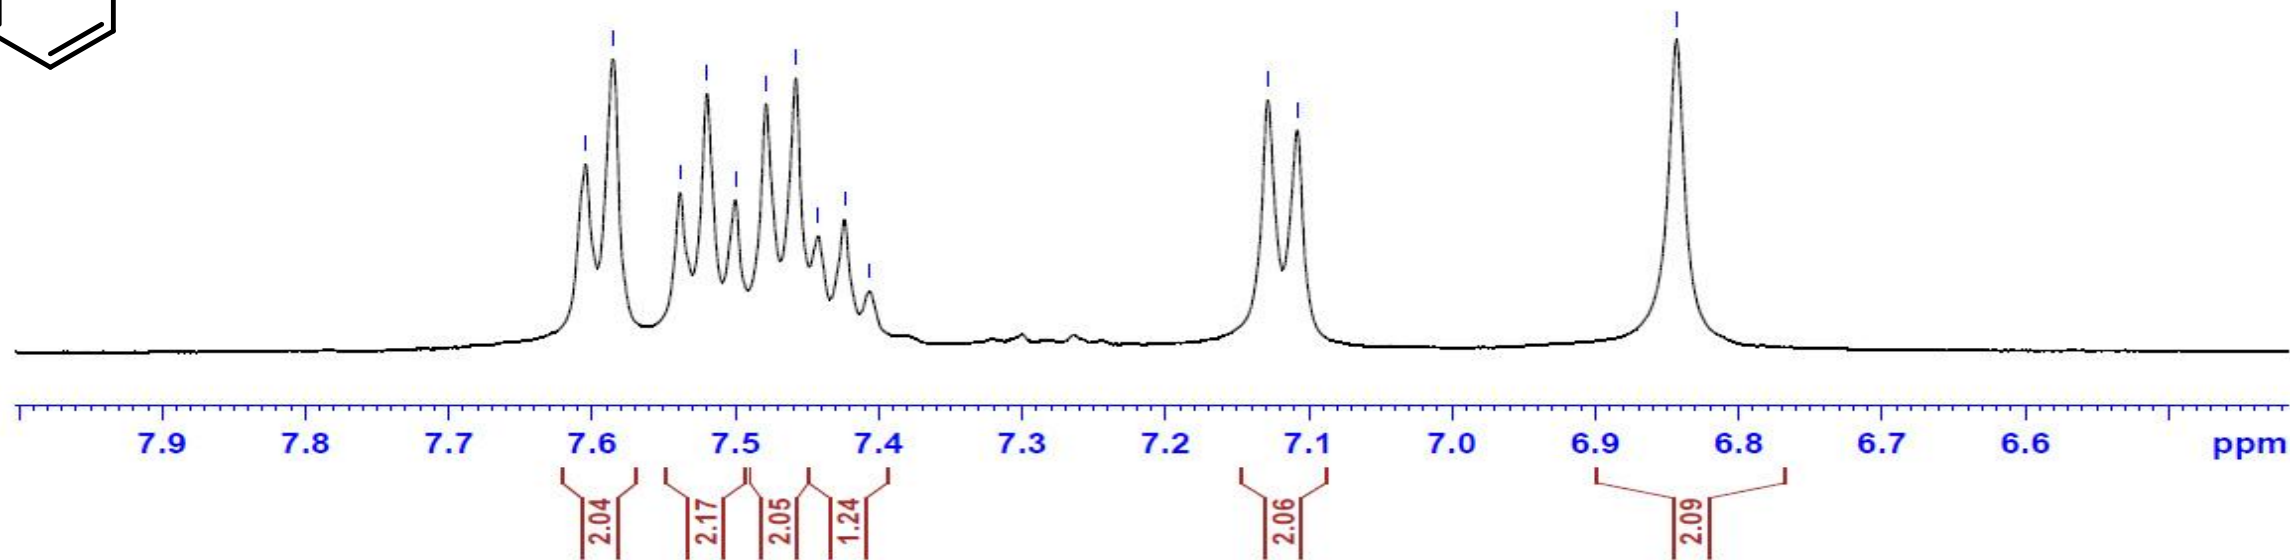

Alaa Abdallah - 23(2) - C13 - T

180.0439  
166.1668  
165.3759  
144.0340  
136.6829  
132.7942  
130.5068  
129.8348  
129.6523  
129.0187  
127.5114  
119.5055  
116.6984

58.5380  
55.7323  
55.6263  
40.6005  
40.3919  
40.1831  
39.9744  
39.7659  
39.5570  
39.3486  
20.9046

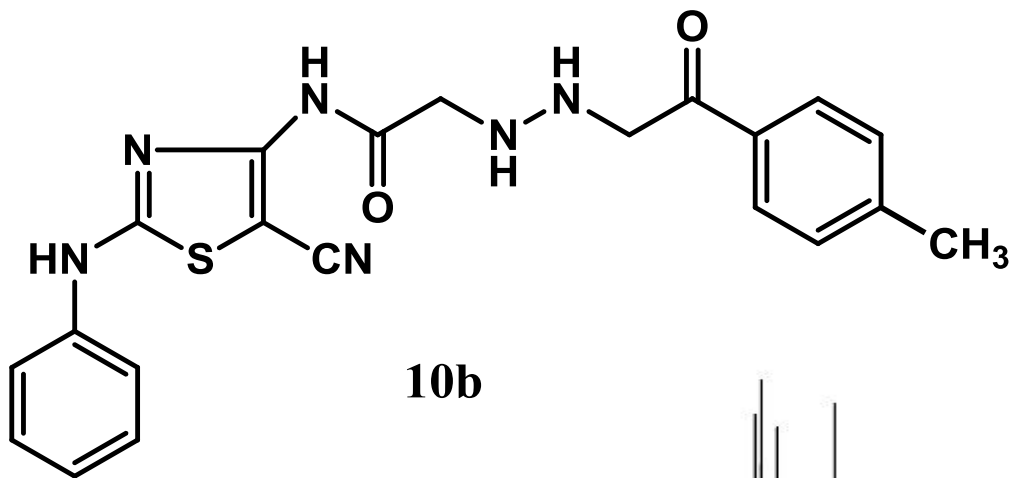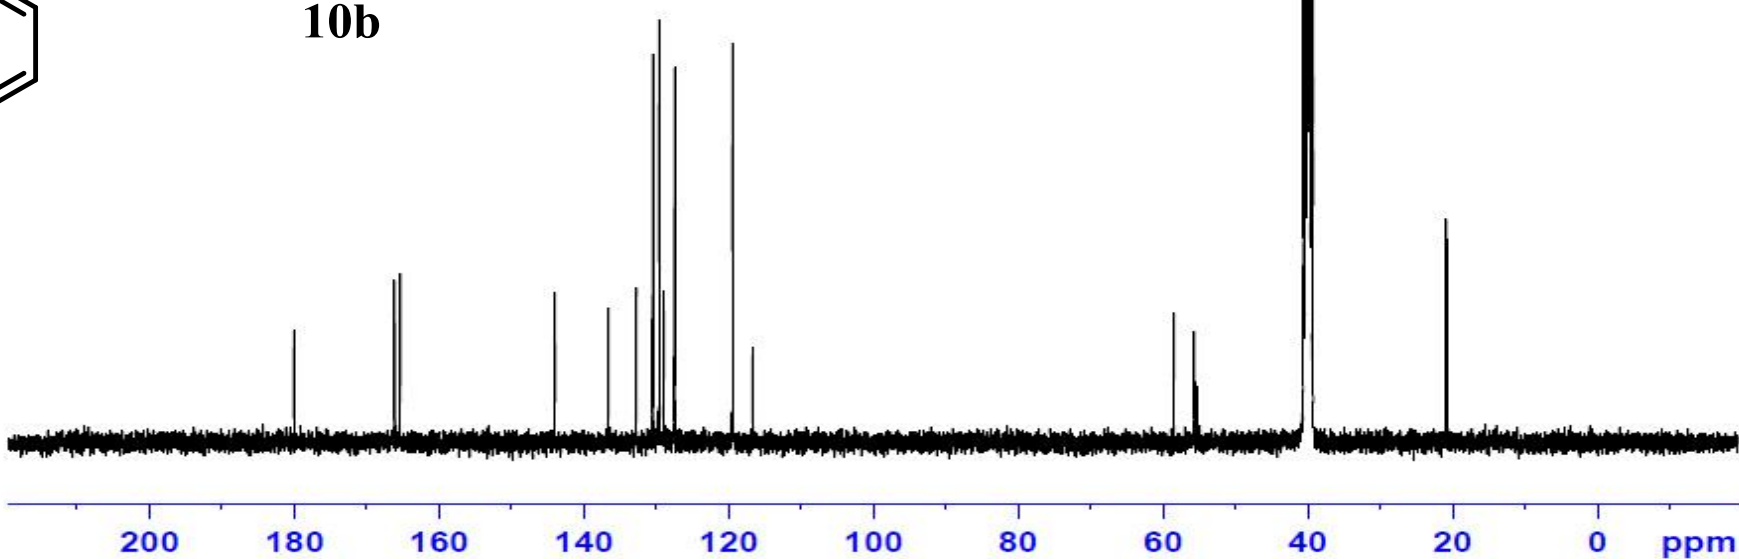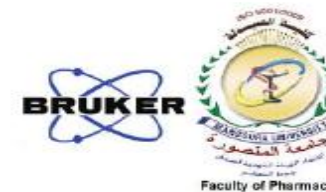

Current Data Parameters  
NAME Alaa Abdallah - 23(2) - C13 - T  
EXPNO 10  
PROCNO 1

F2 - Acquisition Parameters  
Date\_ 20220606  
Time 14.53 h  
INSTRUM spect  
PROBHD E108618\_0945 (1  
PULPROG zgpg30  
TD 65536  
SOLVENT DMSO  
NS 2100  
DS 4  
SWH 24038.461 Hz  
FIDRES 0.733596 Hz  
AQ 1.3631488 sec  
RG 297.77  
DM 20.800 usec  
DE 6.50 usec  
TE 296.3 K  
D1 2.00000000 sec  
D11 0.03000000 sec  
TDO 1  
SFO1 100.6404331 MHz  
NUC1 13C  
P1 10.00 usec  
PLW1 47.00000000 W  
SFO2 400.2016008 MHz  
NUC2 1H  
CPDPRG2 waltz16  
PCPD2 90.00 usec  
PLW2 13.00000000 W  
PLW12 0.29249999 W  
PLW13 0.14713000 W

F2 - Processing parameters  
SI 32768  
SF 100.6303700 MHz  
WDW EM  
SSB 0  
LB 1.00 Hz  
GB 0  
PC 1.40

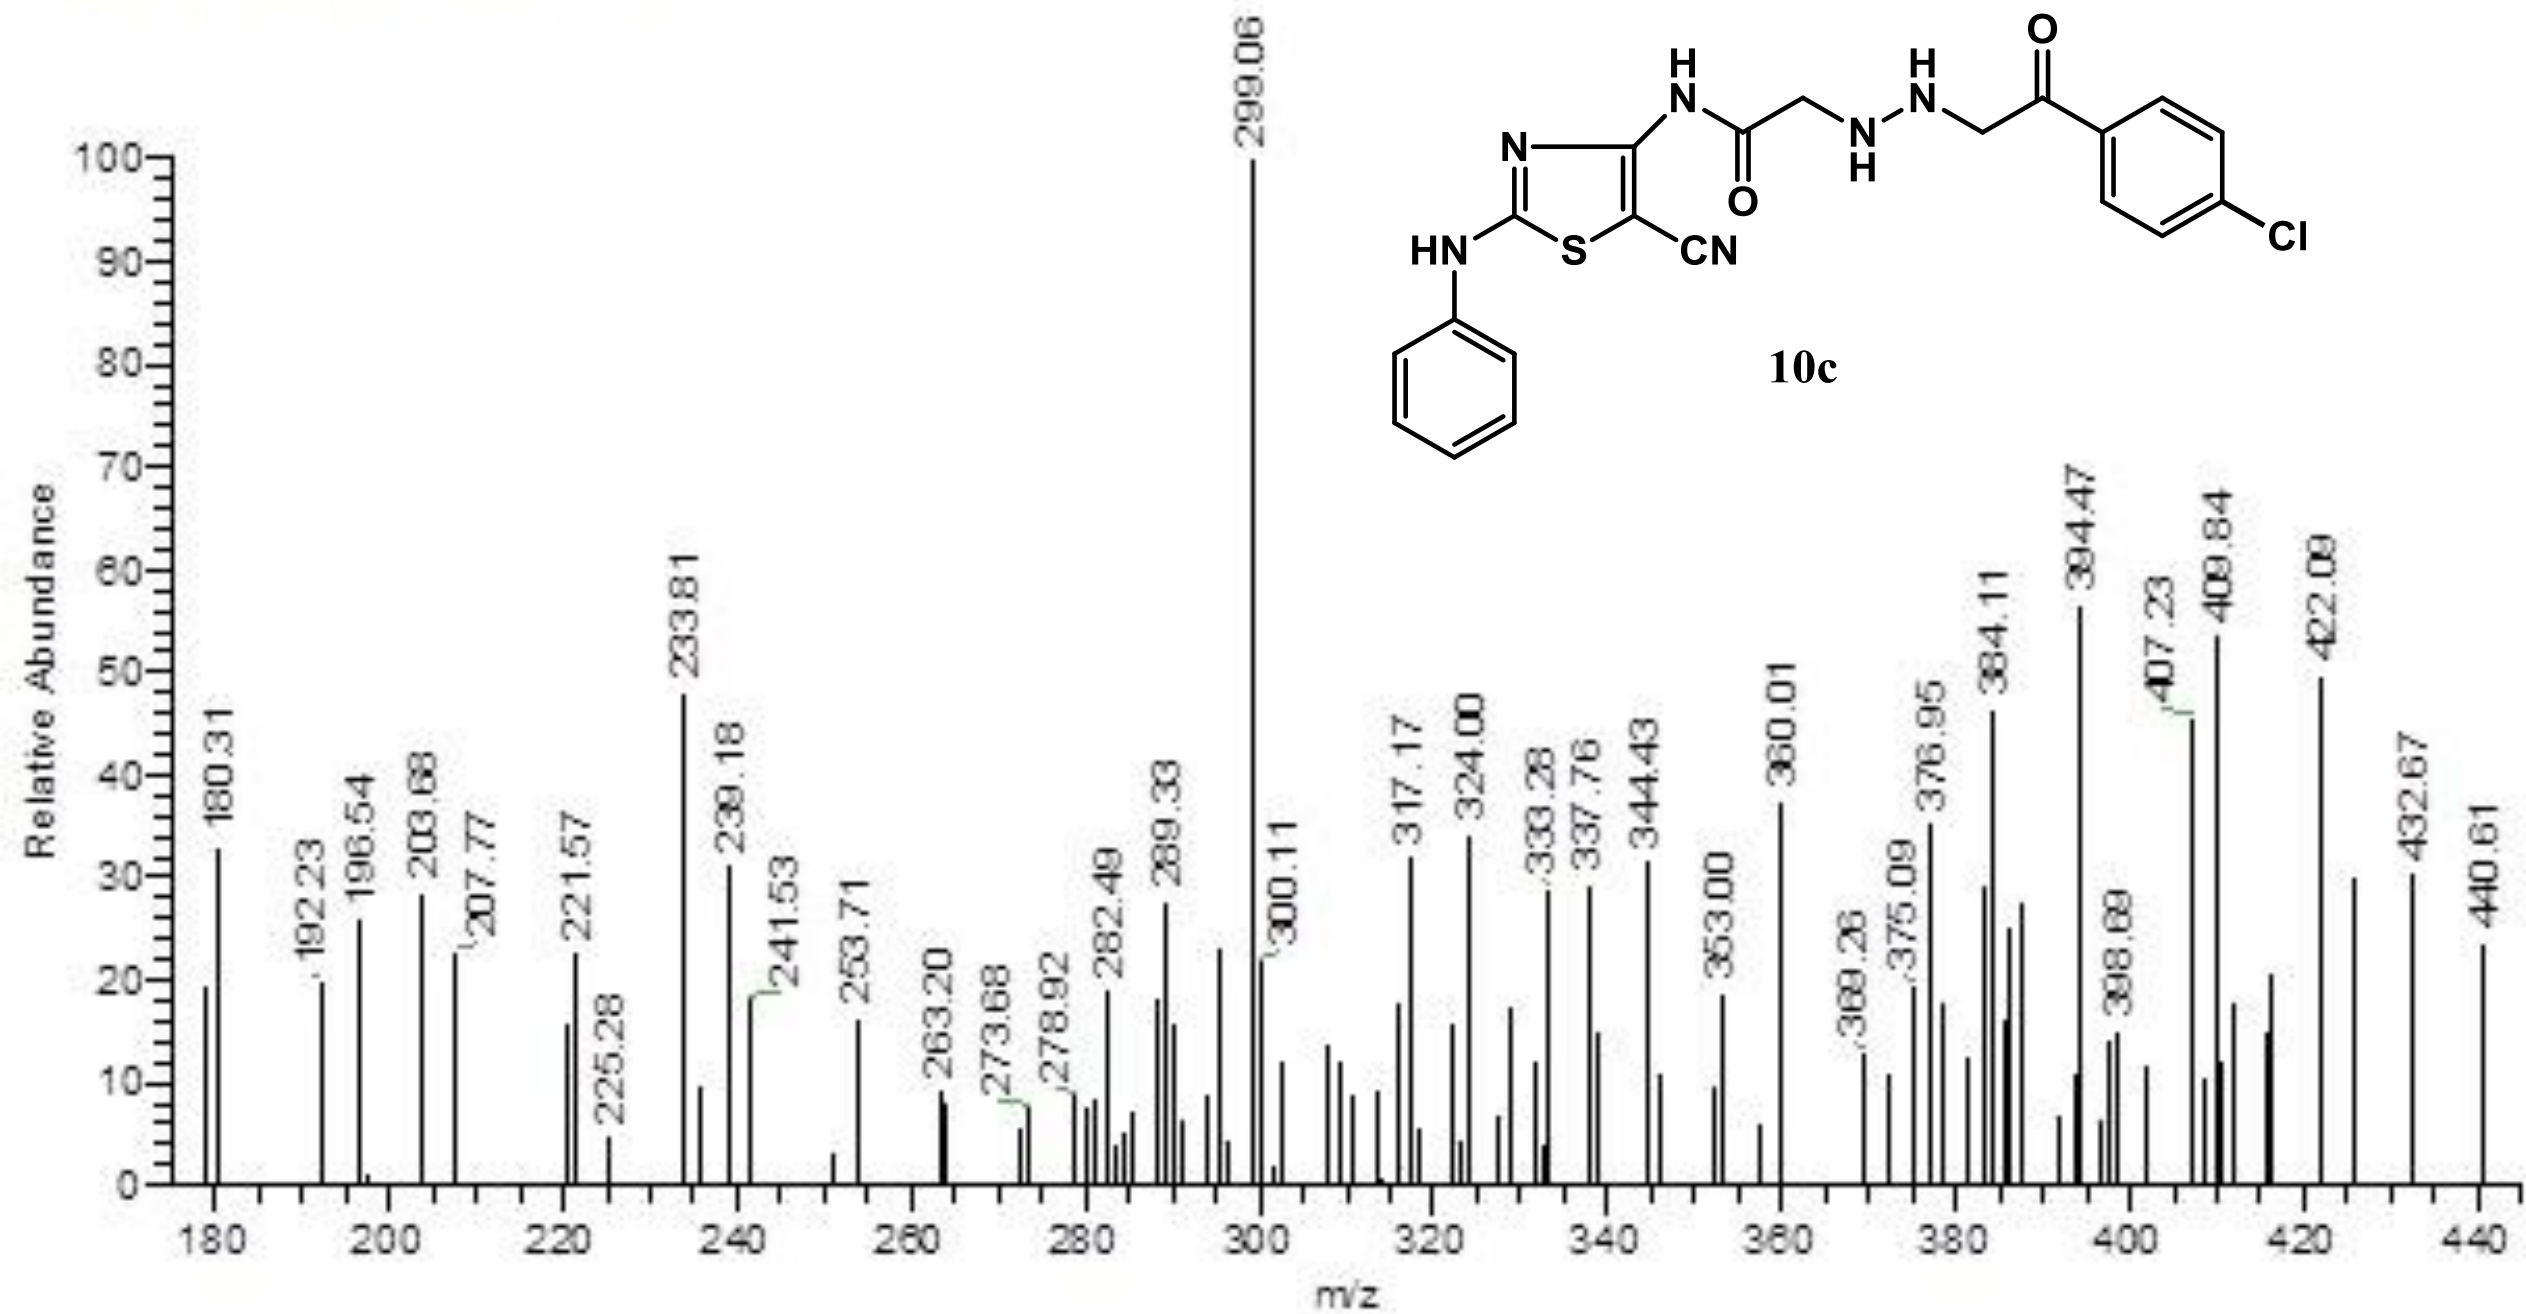

# Display Report

## Analysis Info

Analysis Name D:\Data\Training\Alaa Abd Allah\10 c\New folder\10c 10ppm.d  
Method pip1.m  
Sample Name 10c  
Comment

Acquisition Date 2/12/2024 10:13:53 AM  
Operator Demo User  
Instrument compact 8255754.20351

## Acquisition Parameter

|             |            |                      |          |                  |           |
|-------------|------------|----------------------|----------|------------------|-----------|
| Source Type | ESI        | Ion Polarity         | Positive | Set Nebulizer    | 0.3 Bar   |
| Focus       | Not active | Set Capillary        | 3500 V   | Set Dry Heater   | 200 °C    |
| Scan Begin  | 400 m/z    | Set End Plate Offset | -500 V   | Set Dry Gas      | 3.0 l/min |
| Scan End    | 500 m/z    | Set Charging Voltage | 2000 V   | Set Divert Valve | Source    |
|             |            | Set Corona           | 0 nA     | Set APCI Heater  | 0 °C      |

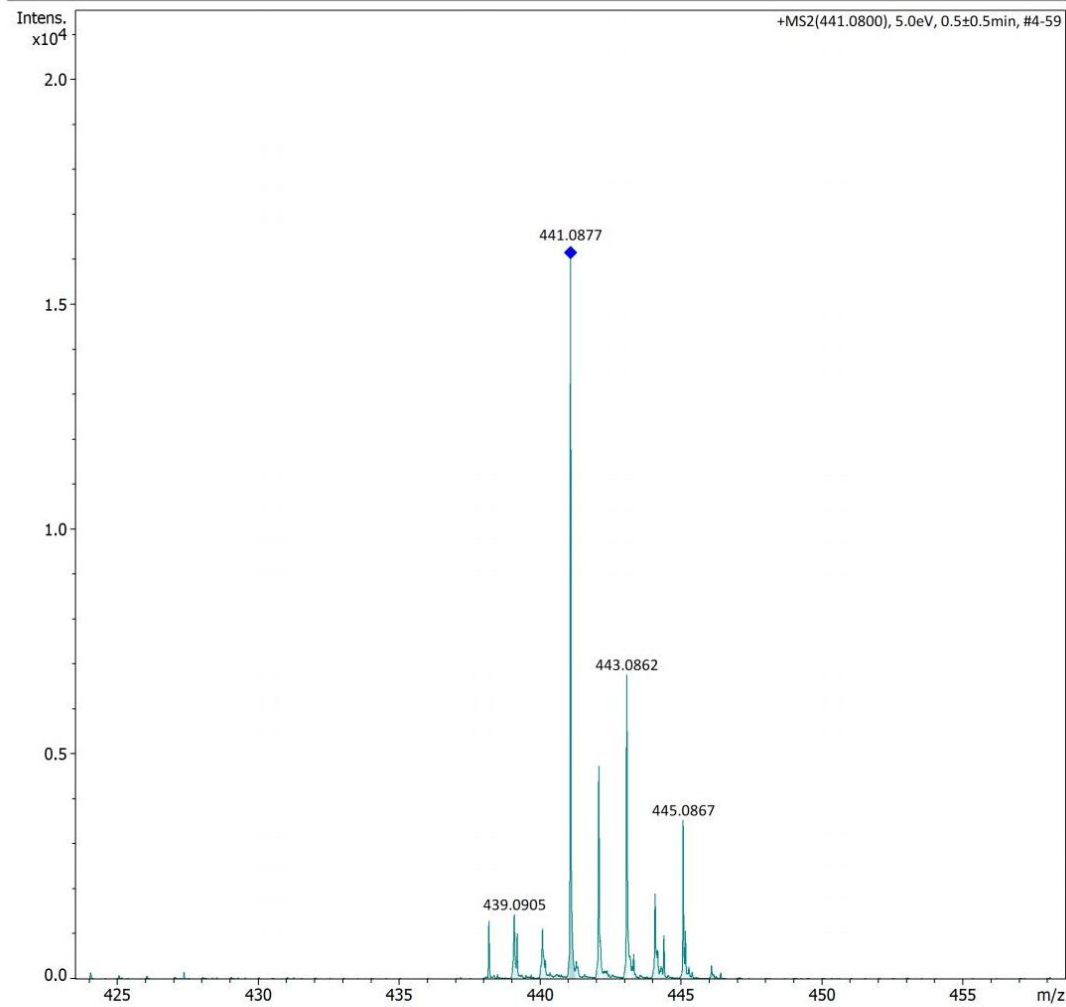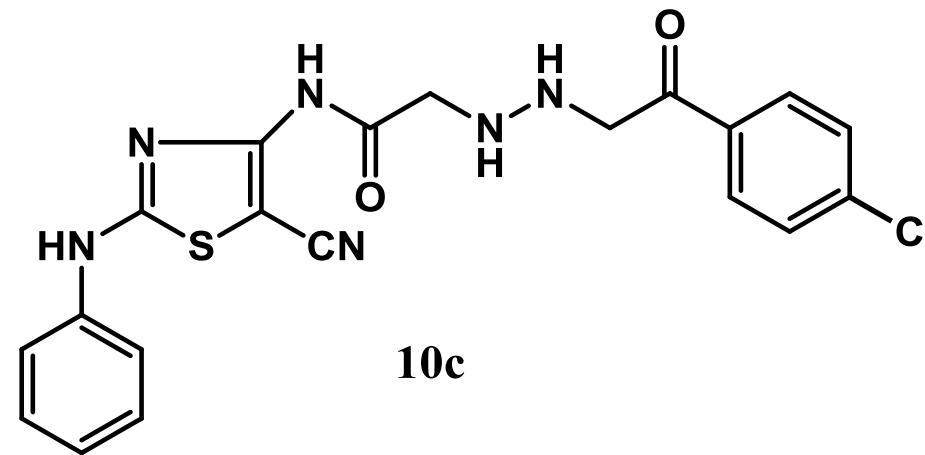

alaa abdallah-clAcl.clphBr-H-em

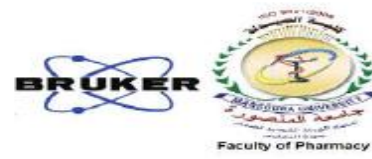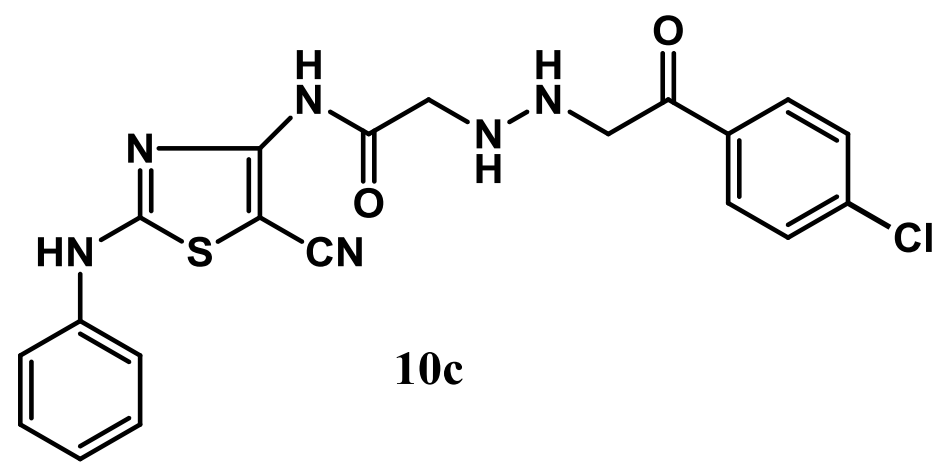

7.94  
7.92  
7.53  
7.51  
7.51  
7.49  
7.47  
7.44  
7.42  
5.28  
4.72

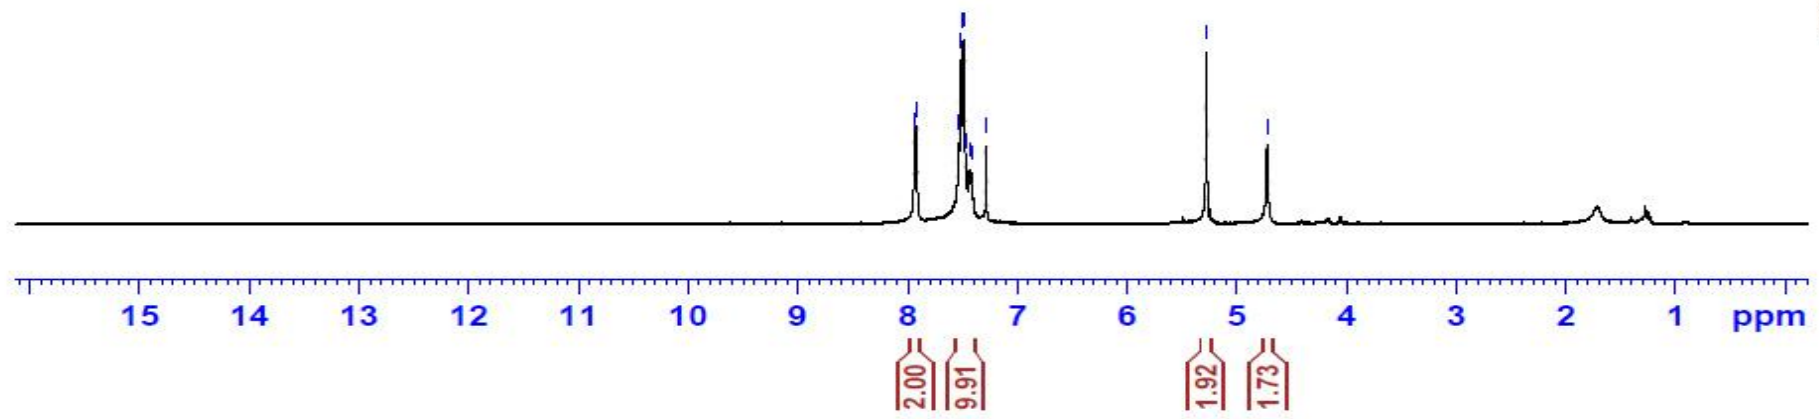

Current Data Parameters  
NAME alaa abdallah-clAcl.clphBr-H-em  
EXPNO 10  
PROCNO 1

F2 - Acquisition Parameters  
Date\_ 20211013  
Time\_ 13.53 h  
INSTRUM spect  
PROBHD Z108618\_0945 ( )  
PULPROG zg30  
TD 65536  
SOLVENT CDCl3  
NS 16  
DS 2  
SWH 8012.820 Hz  
FIDRES 0.244532 Hz  
AQ 4.0894465 sec  
RG 176.72  
DW 62.400 usec  
DE 6.50 usec  
TE 293.7 K  
D1 1.00000000 sec  
TD0 1  
SFO1 400.2024712 MHz  
NUC1 1H  
P1 13.50 usec  
PLW1 13.00000000 W

F2 - Processing parameters  
SI 65536  
SF 400.2000000 MHz  
WDW EM  
SSB 0  
LB 0.30 Hz  
GB 0  
PC 1.00



Alaa abdallah-Cl.A.Cl+Cl.Ph.Br-RR-C13

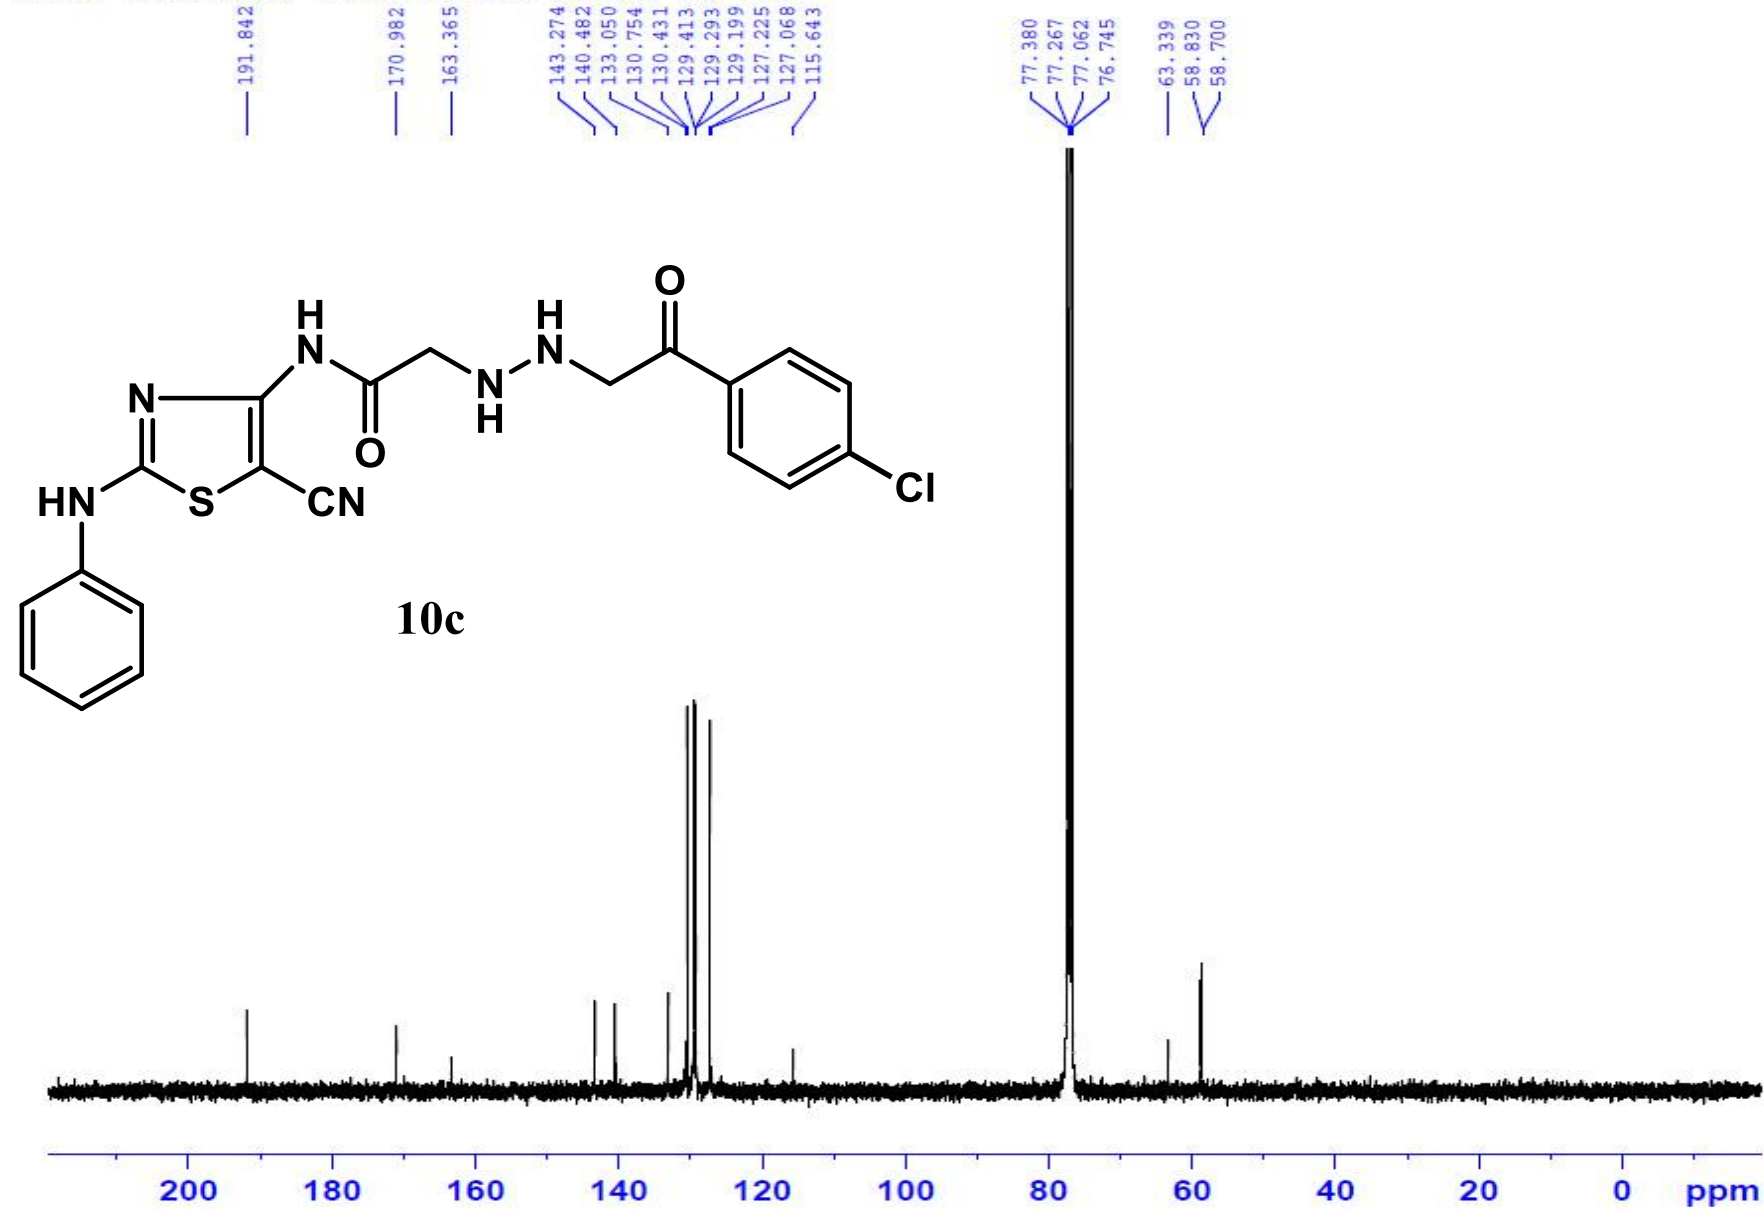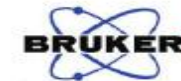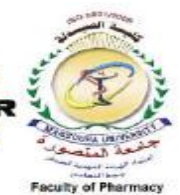

Current Data Parameters  
NAME Alaa abdallah-Cl.A.Cl+Cl.Ph.Br-RR-C13  
EXPNO 10  
PROCNO 1

F2 - Acquisition Parameters  
Date\_ 20220319  
Time 22.11 h  
INSTRUM spect  
PROBHD Z108618.0945 (4  
PULPROG zgpg30  
TD 65536  
SOLVENT CDCl3  
NS 2200  
DS 4  
SWH 24038.461 Hz  
FIDRES 0.733596 Hz  
AQ 1.3631488 sec  
RG 197.77  
DM 20.800 usec  
DE 6.50 usec  
TE 294.2 K  
D1 2.0000000 sec  
d11 0.0000000 sec  
YD0 1  
SFO1 100.6204331 MHz  
NUC1 13C  
P1 10.00 usec  
PLW1 47.0000000 W  
SFO2 400.2016008 MHz  
NUC2 1H  
PCPD2 waltz16  
PCPD2 90.00 usec  
PLW2 13.0000000 W  
PLW12 0.2924999 W  
PLW13 0.14713000 W

F2 - Processing parameters  
SI 32768  
SF 100.6203700 MHz  
WDW EM  
SSB 0  
LB 1.00 Hz  
GB 0  
PC 1.40



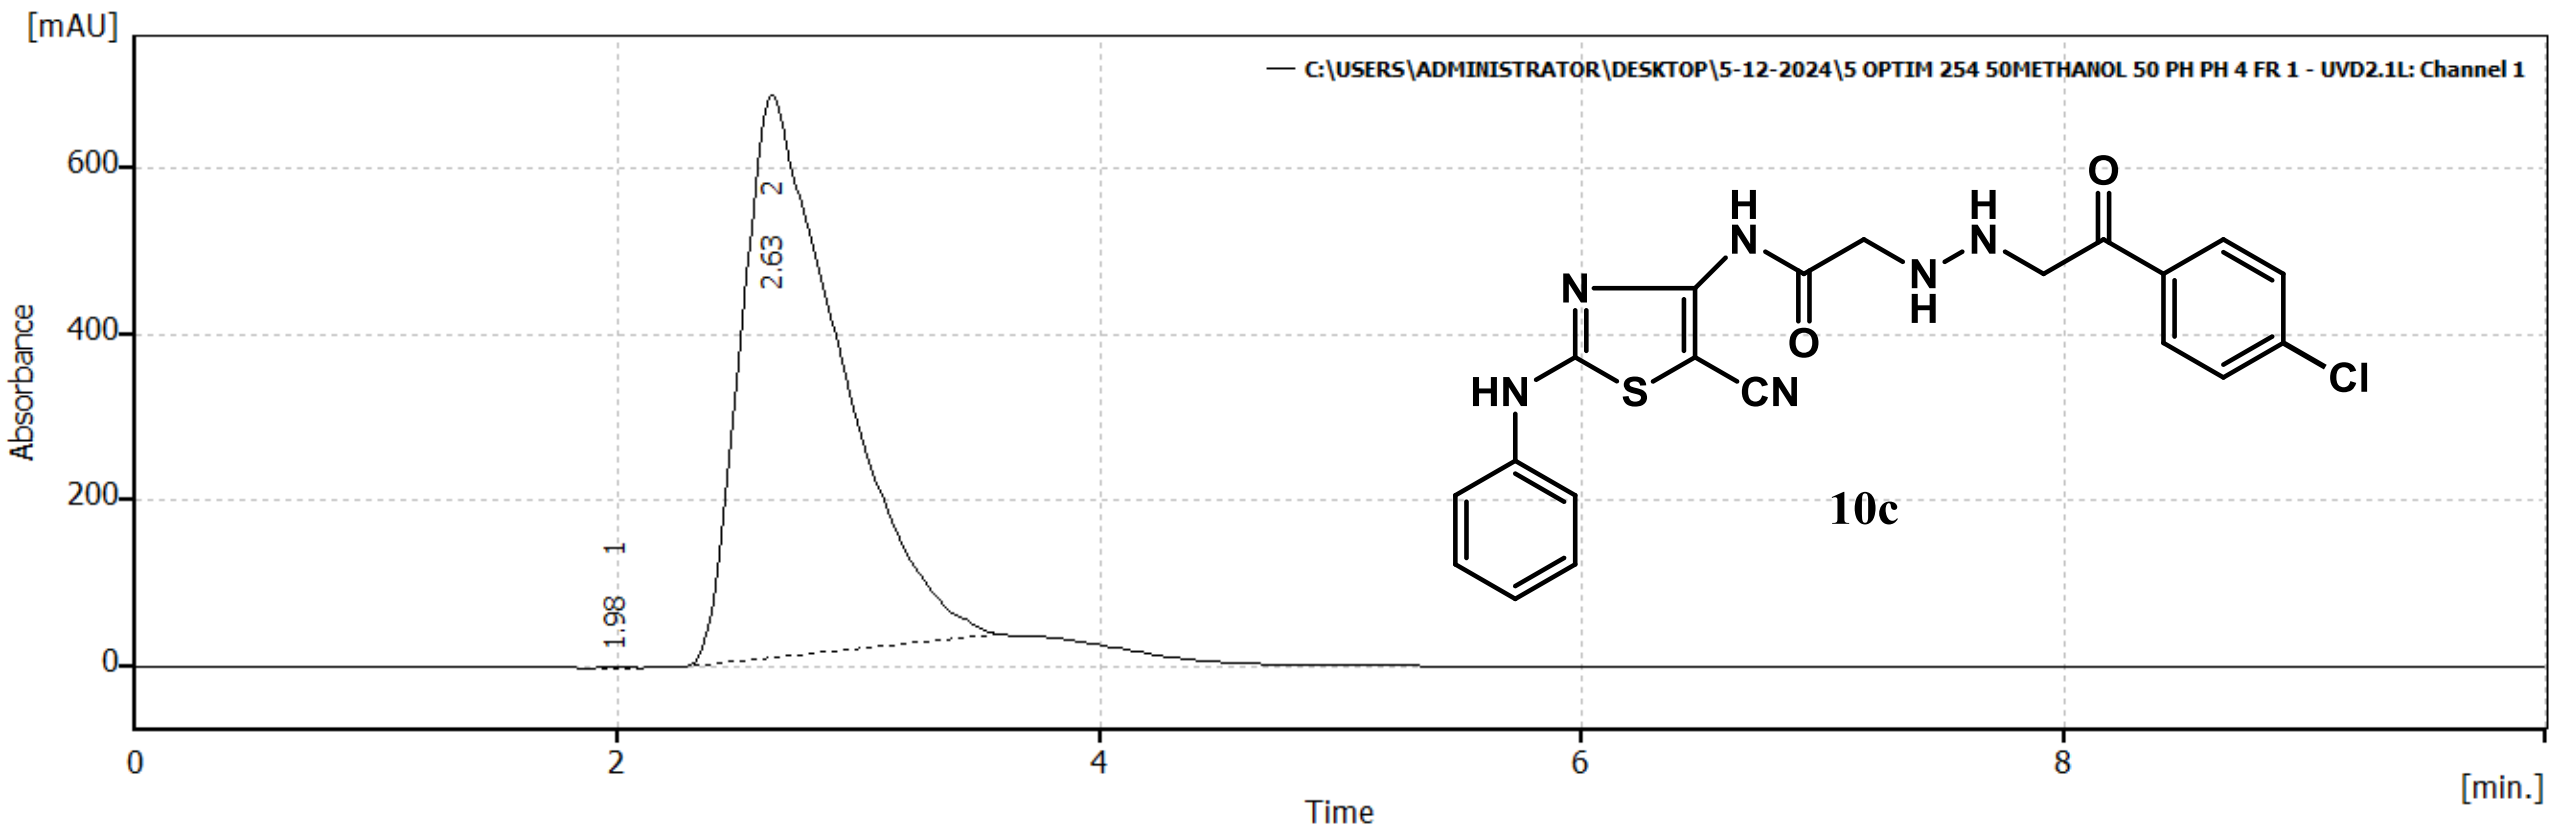

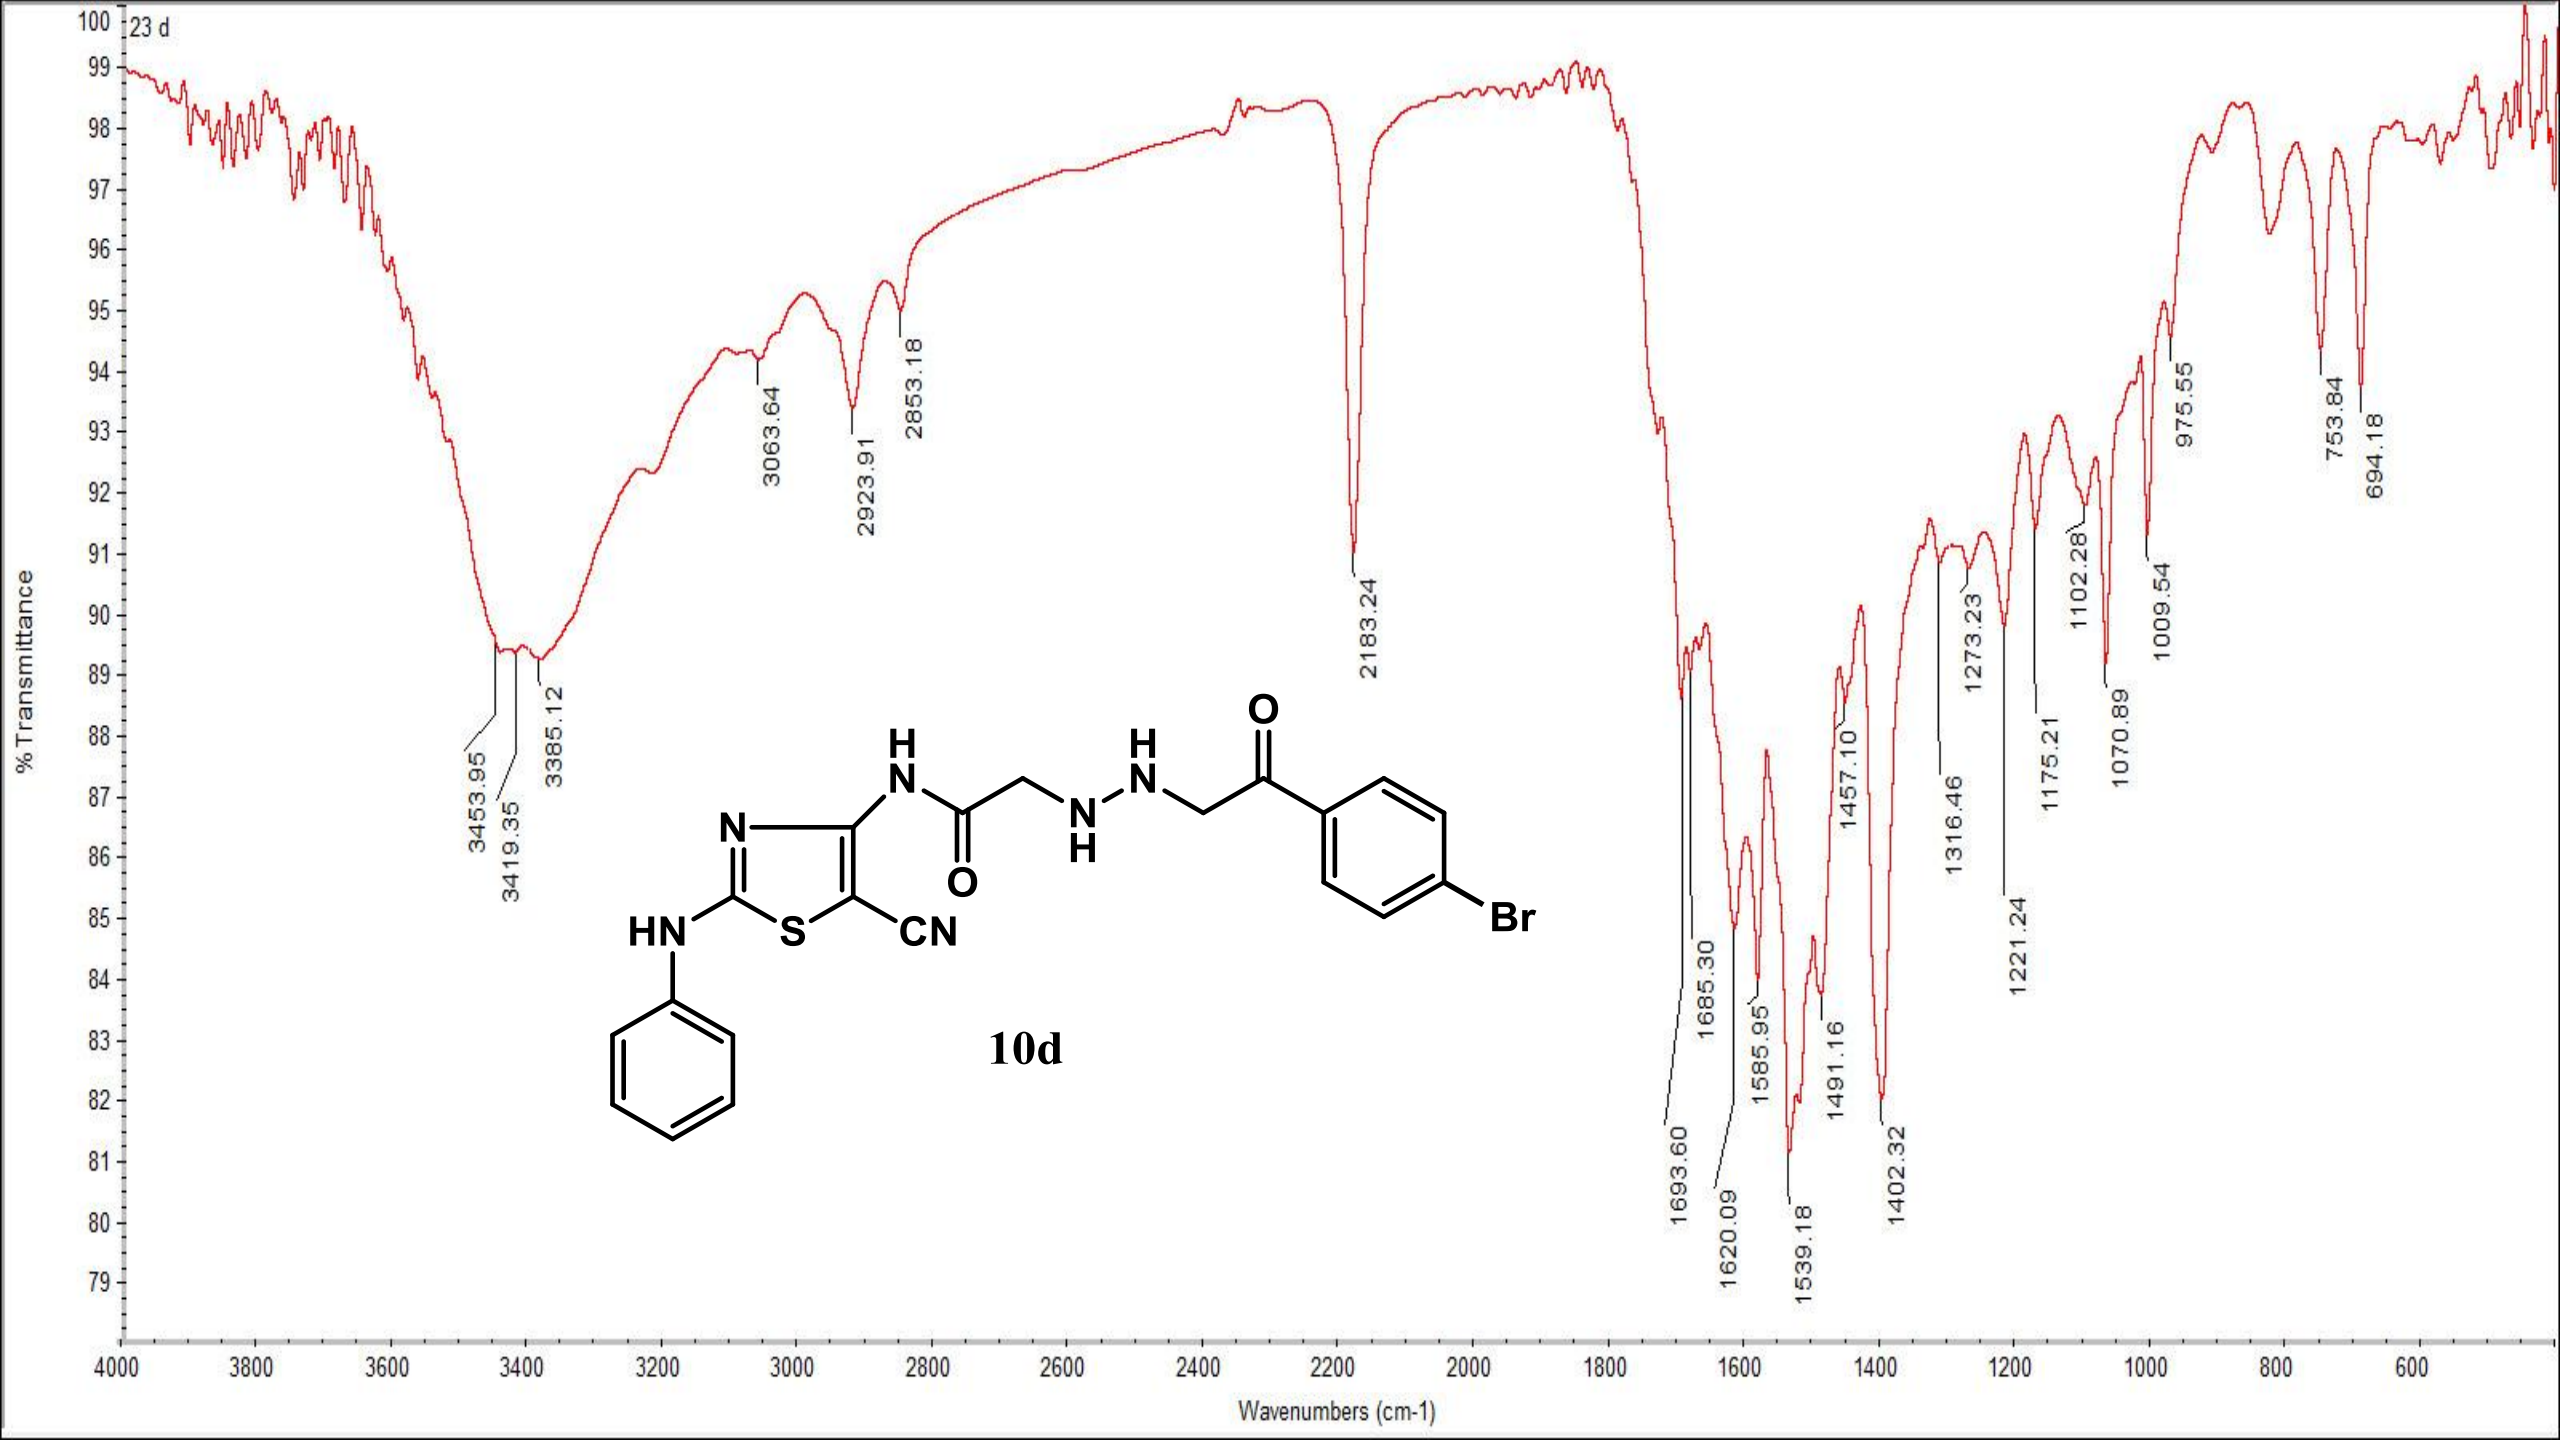

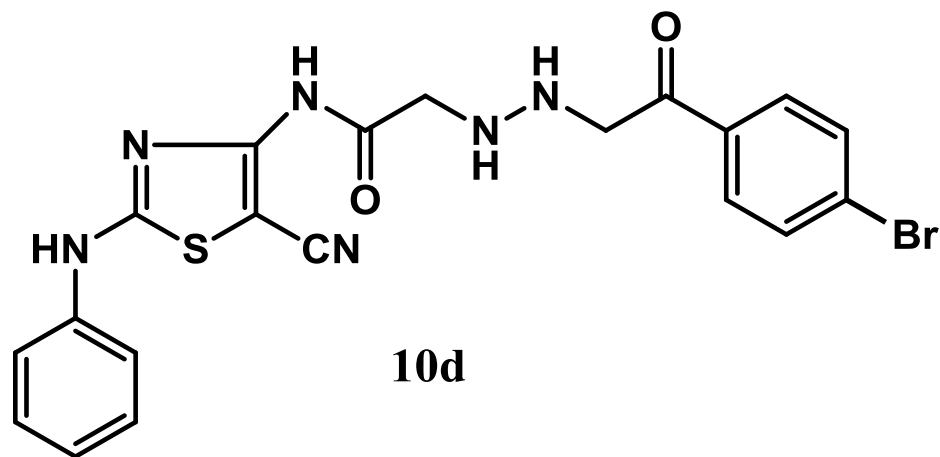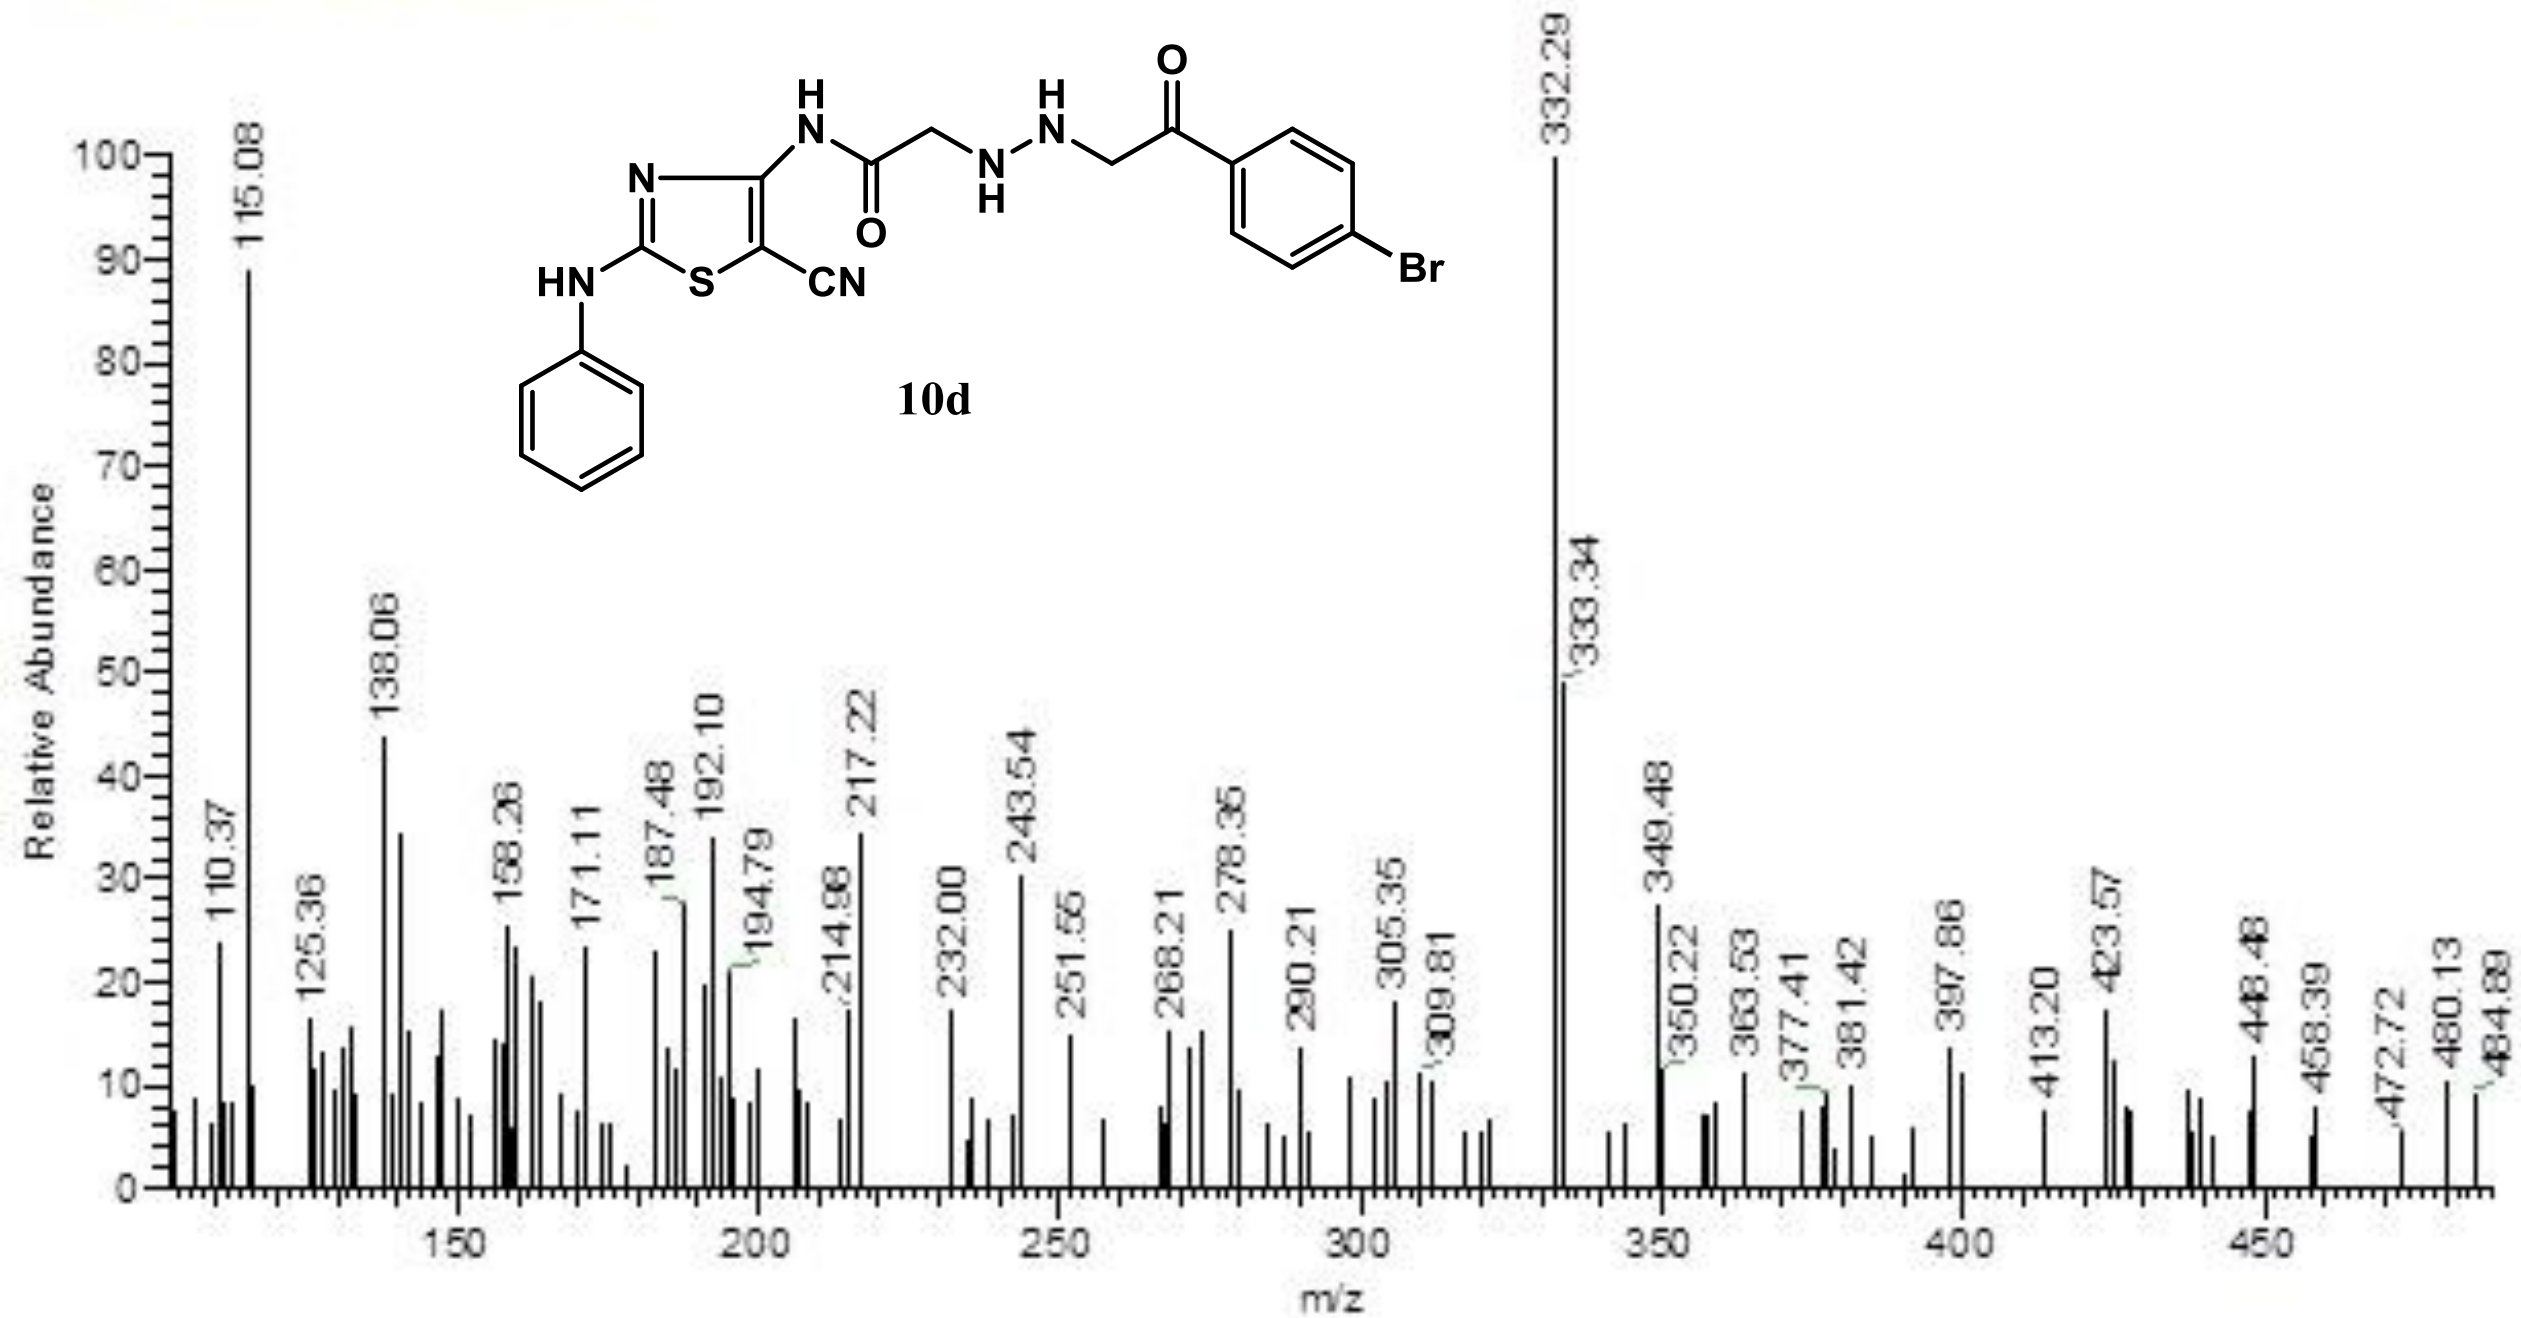

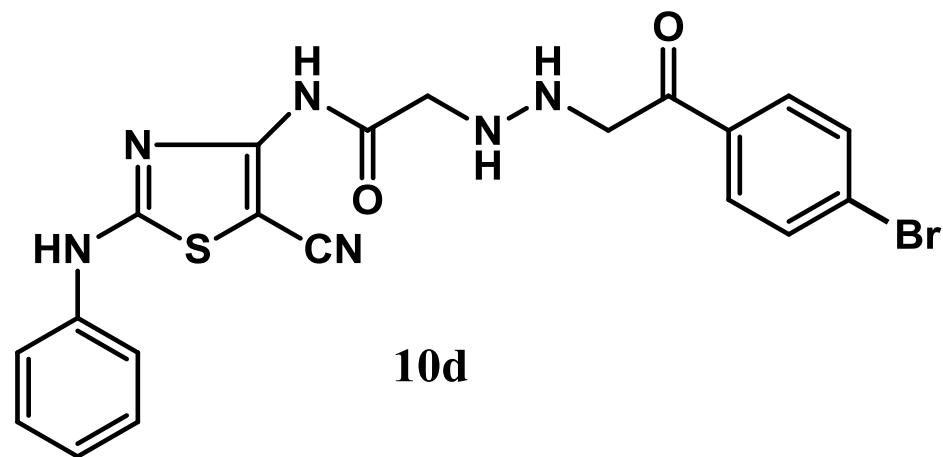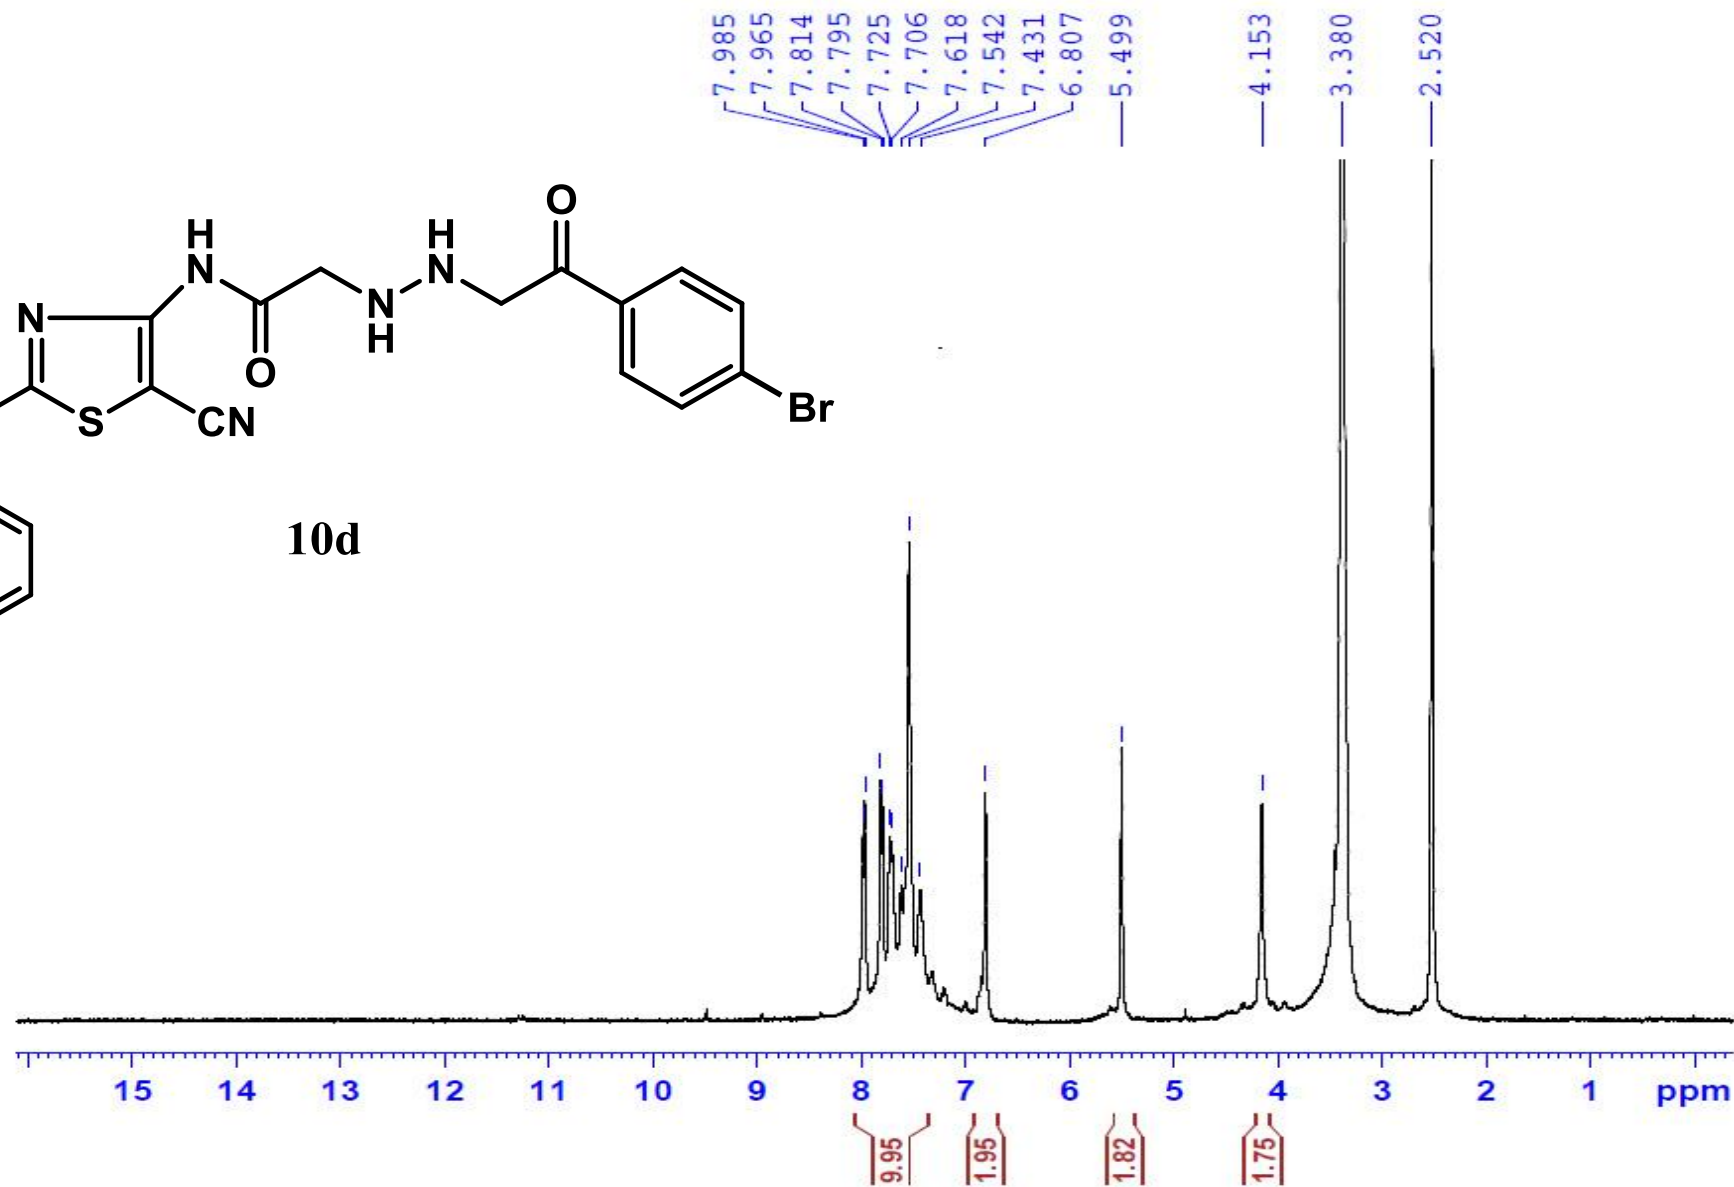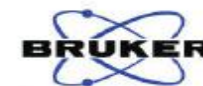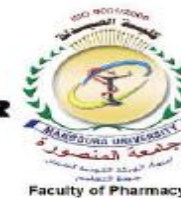

Current Data Parameters  
NAME Alaa Abdullah-18-HNMF  
EXPNO 10  
PROCNO 1

F2 - Acquisition Parameters  
Date\_ 20220510  
Time\_ 15.02 h  
INSTRUM spect  
PROBHD Z108618\_0945 (   
PULPROG zg30  
TD 65536  
SOLVENT DMSO  
NS 16  
DS 2  
SWH 8012.820 Hz  
FIDRES 0.244532 Hz  
AQ 4.0894465 sec  
RG 135.42  
DW 62.400 usec  
DE 6.50 usec  
TE 295.4 K  
D1 1.00000000 sec  
TDO 1  
SFO1 400.2024712 MHz  
NUC1 1H  
P1 13.50 usec  
PLW1 13.00000000 W

F2 - Processing parameters  
SI 65536  
SF 400.2000000 MHz  
WDW EM  
SSB 0  
LB 0.30 Hz  
GB 0  
PC 1.00

Alaa Abdullah-18-HNMR-DMSO-AF

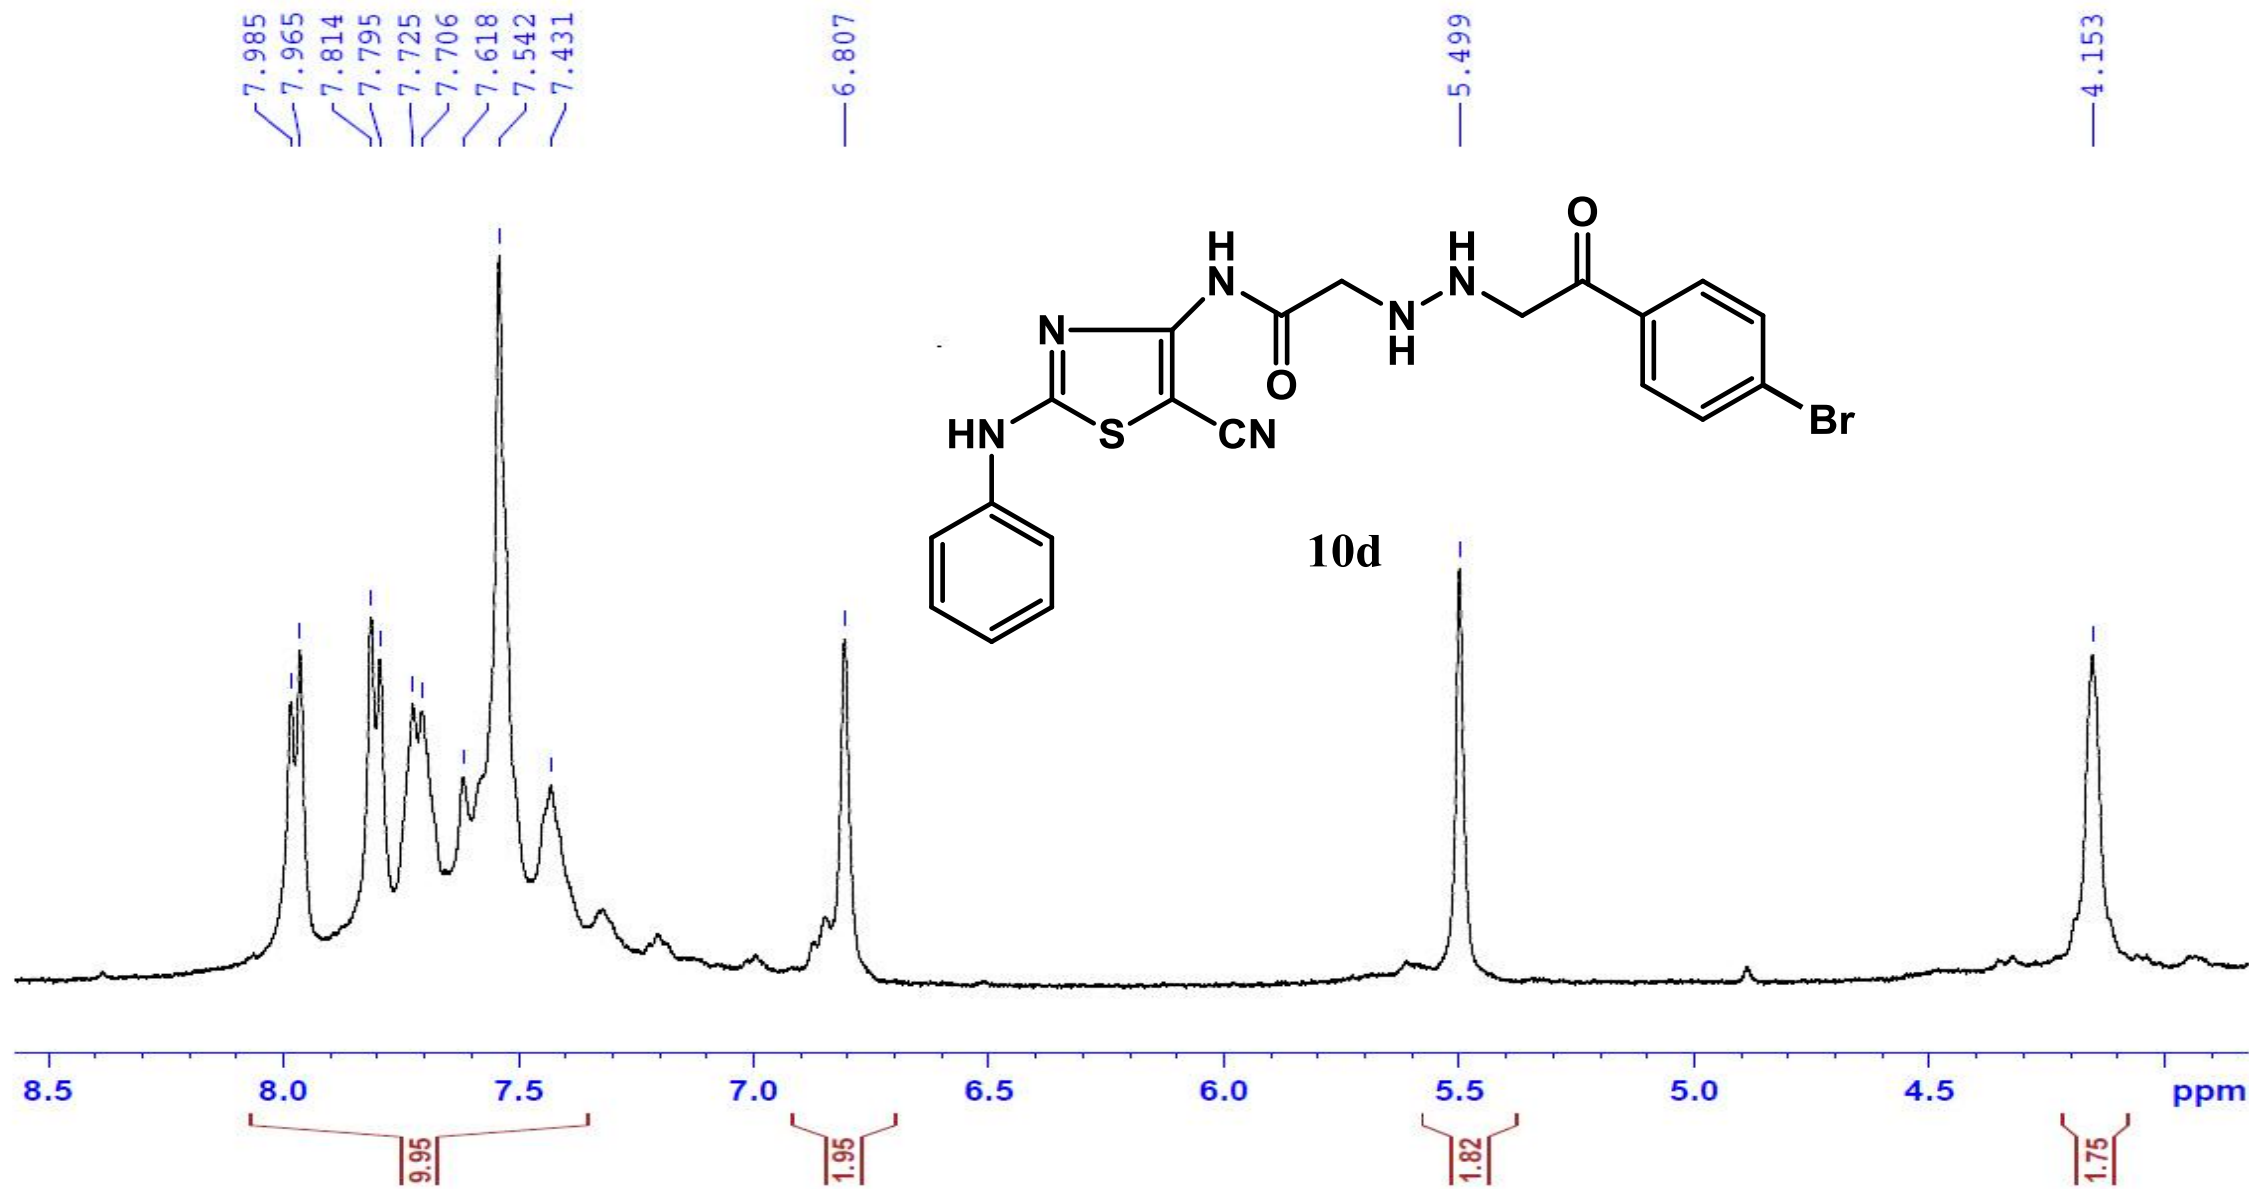

Alaa Abdallah - 18 - C13 - T

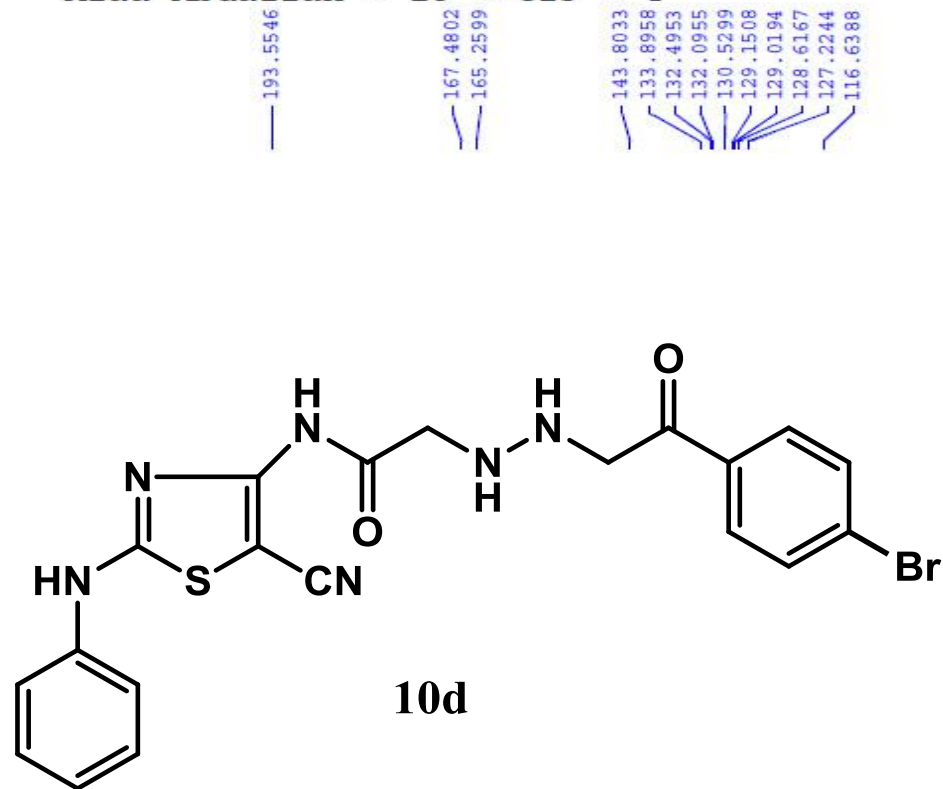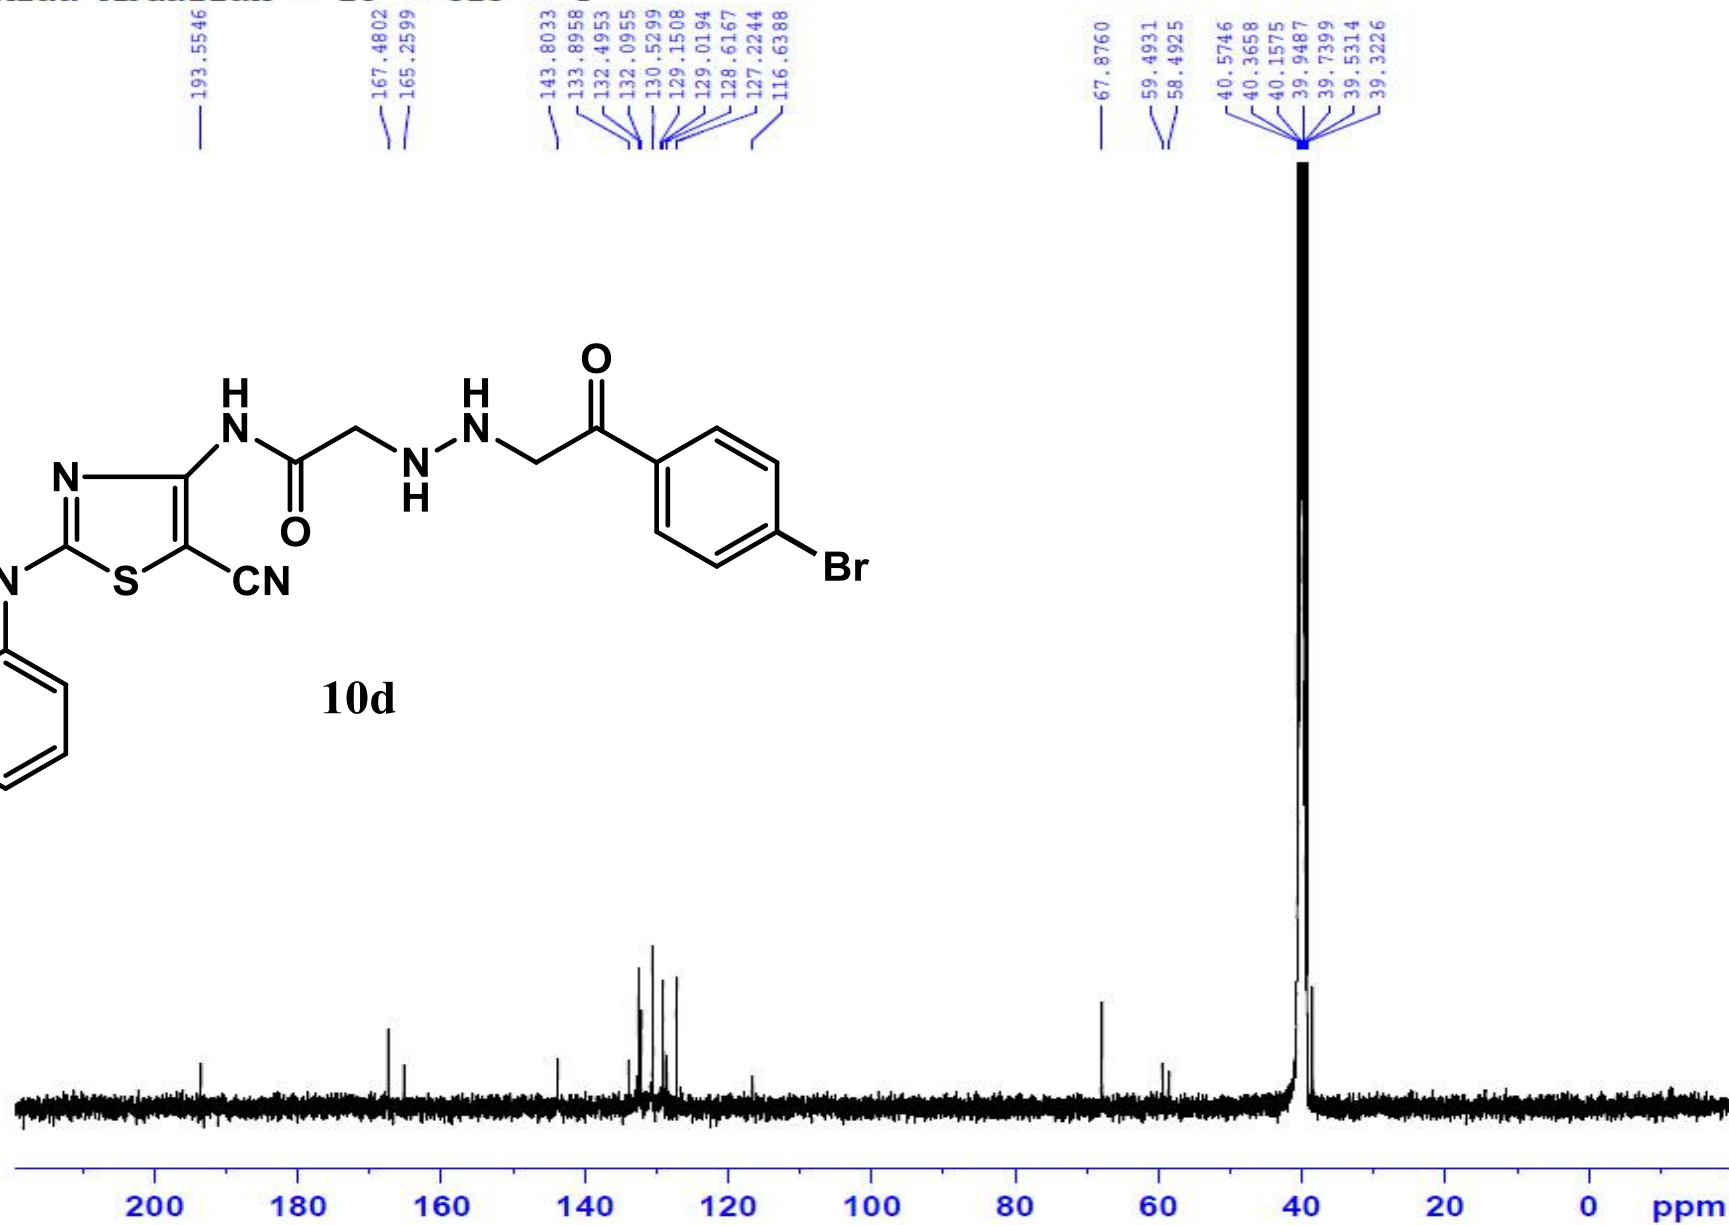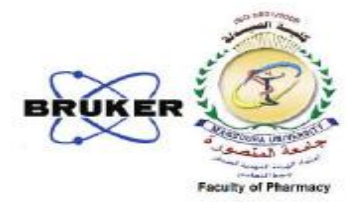

Current Data Parameters  
NAME Alaa Abdallah - 18 - C13 - T  
EXPNO 10  
PROCNO 1

F2 - Acquisition Parameters  
Date\_ 20220528  
Time\_ 20.02 h  
INSTRUM spect  
PROBHD Z108618\_0945 ( )  
PULPROG zgpg30  
TD 65536  
SOLVENT DMSO  
NS 2100  
DS 4  
SWH 24038.461 Hz  
FIDRES 0.733596 Hz  
AQ 1.3631488 sec  
RG 197.77  
DW 20.800 usec  
DE 6.50 usec  
TE 294.4 K  
D1 2.00000000 sec  
D11 0.03000000 sec  
TDO 1  
SFO1 100.6404331 MHz  
NUC1 13C  
P1 10.00 usec  
DLW1 47.00000000 W  
SFO2 400.2016008 MHz  
NUC2 1H  
CDDPRG[2] waltz16  
PCDD2 90.00 usec  
PLW2 13.00000000 W  
DLW12 0.29249999 W  
DLW13 0.14713000 W

F2 - Processing parameters  
SI 32768  
SF 100.6303700 MHz  
WDW EM  
SSB 0  
LB 1.00 Hz  
GB 0  
PC 1.40



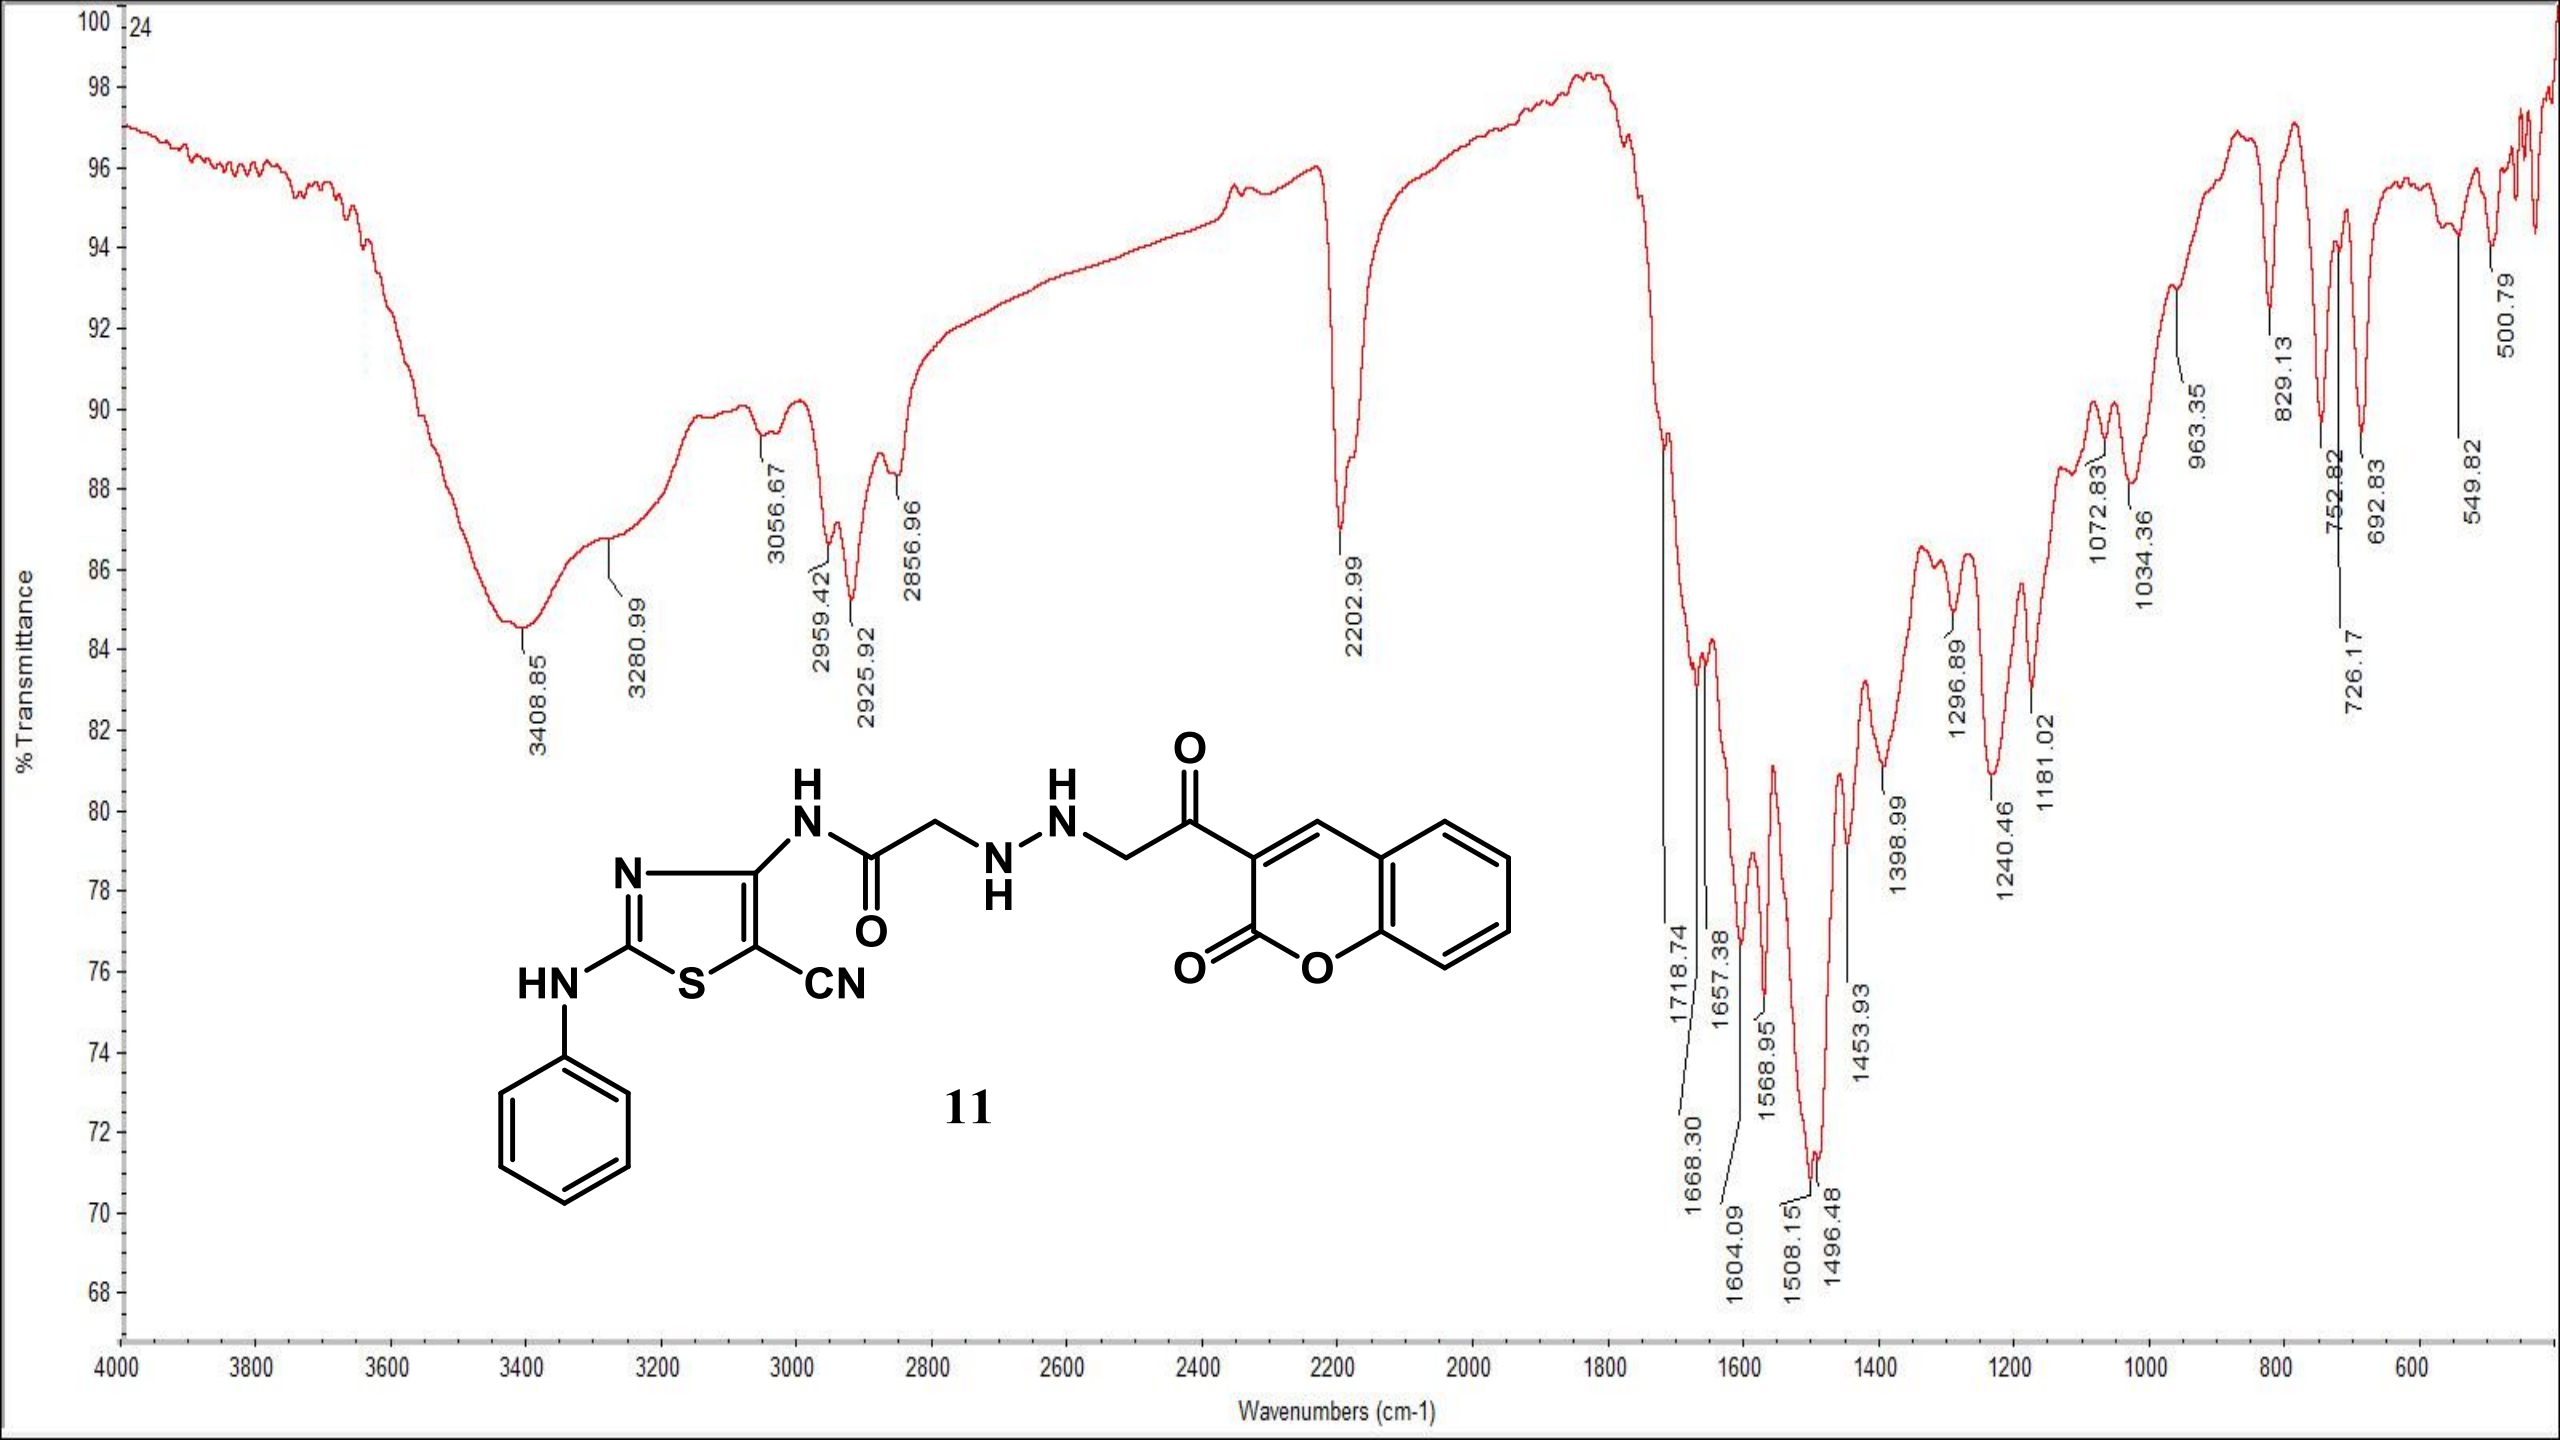

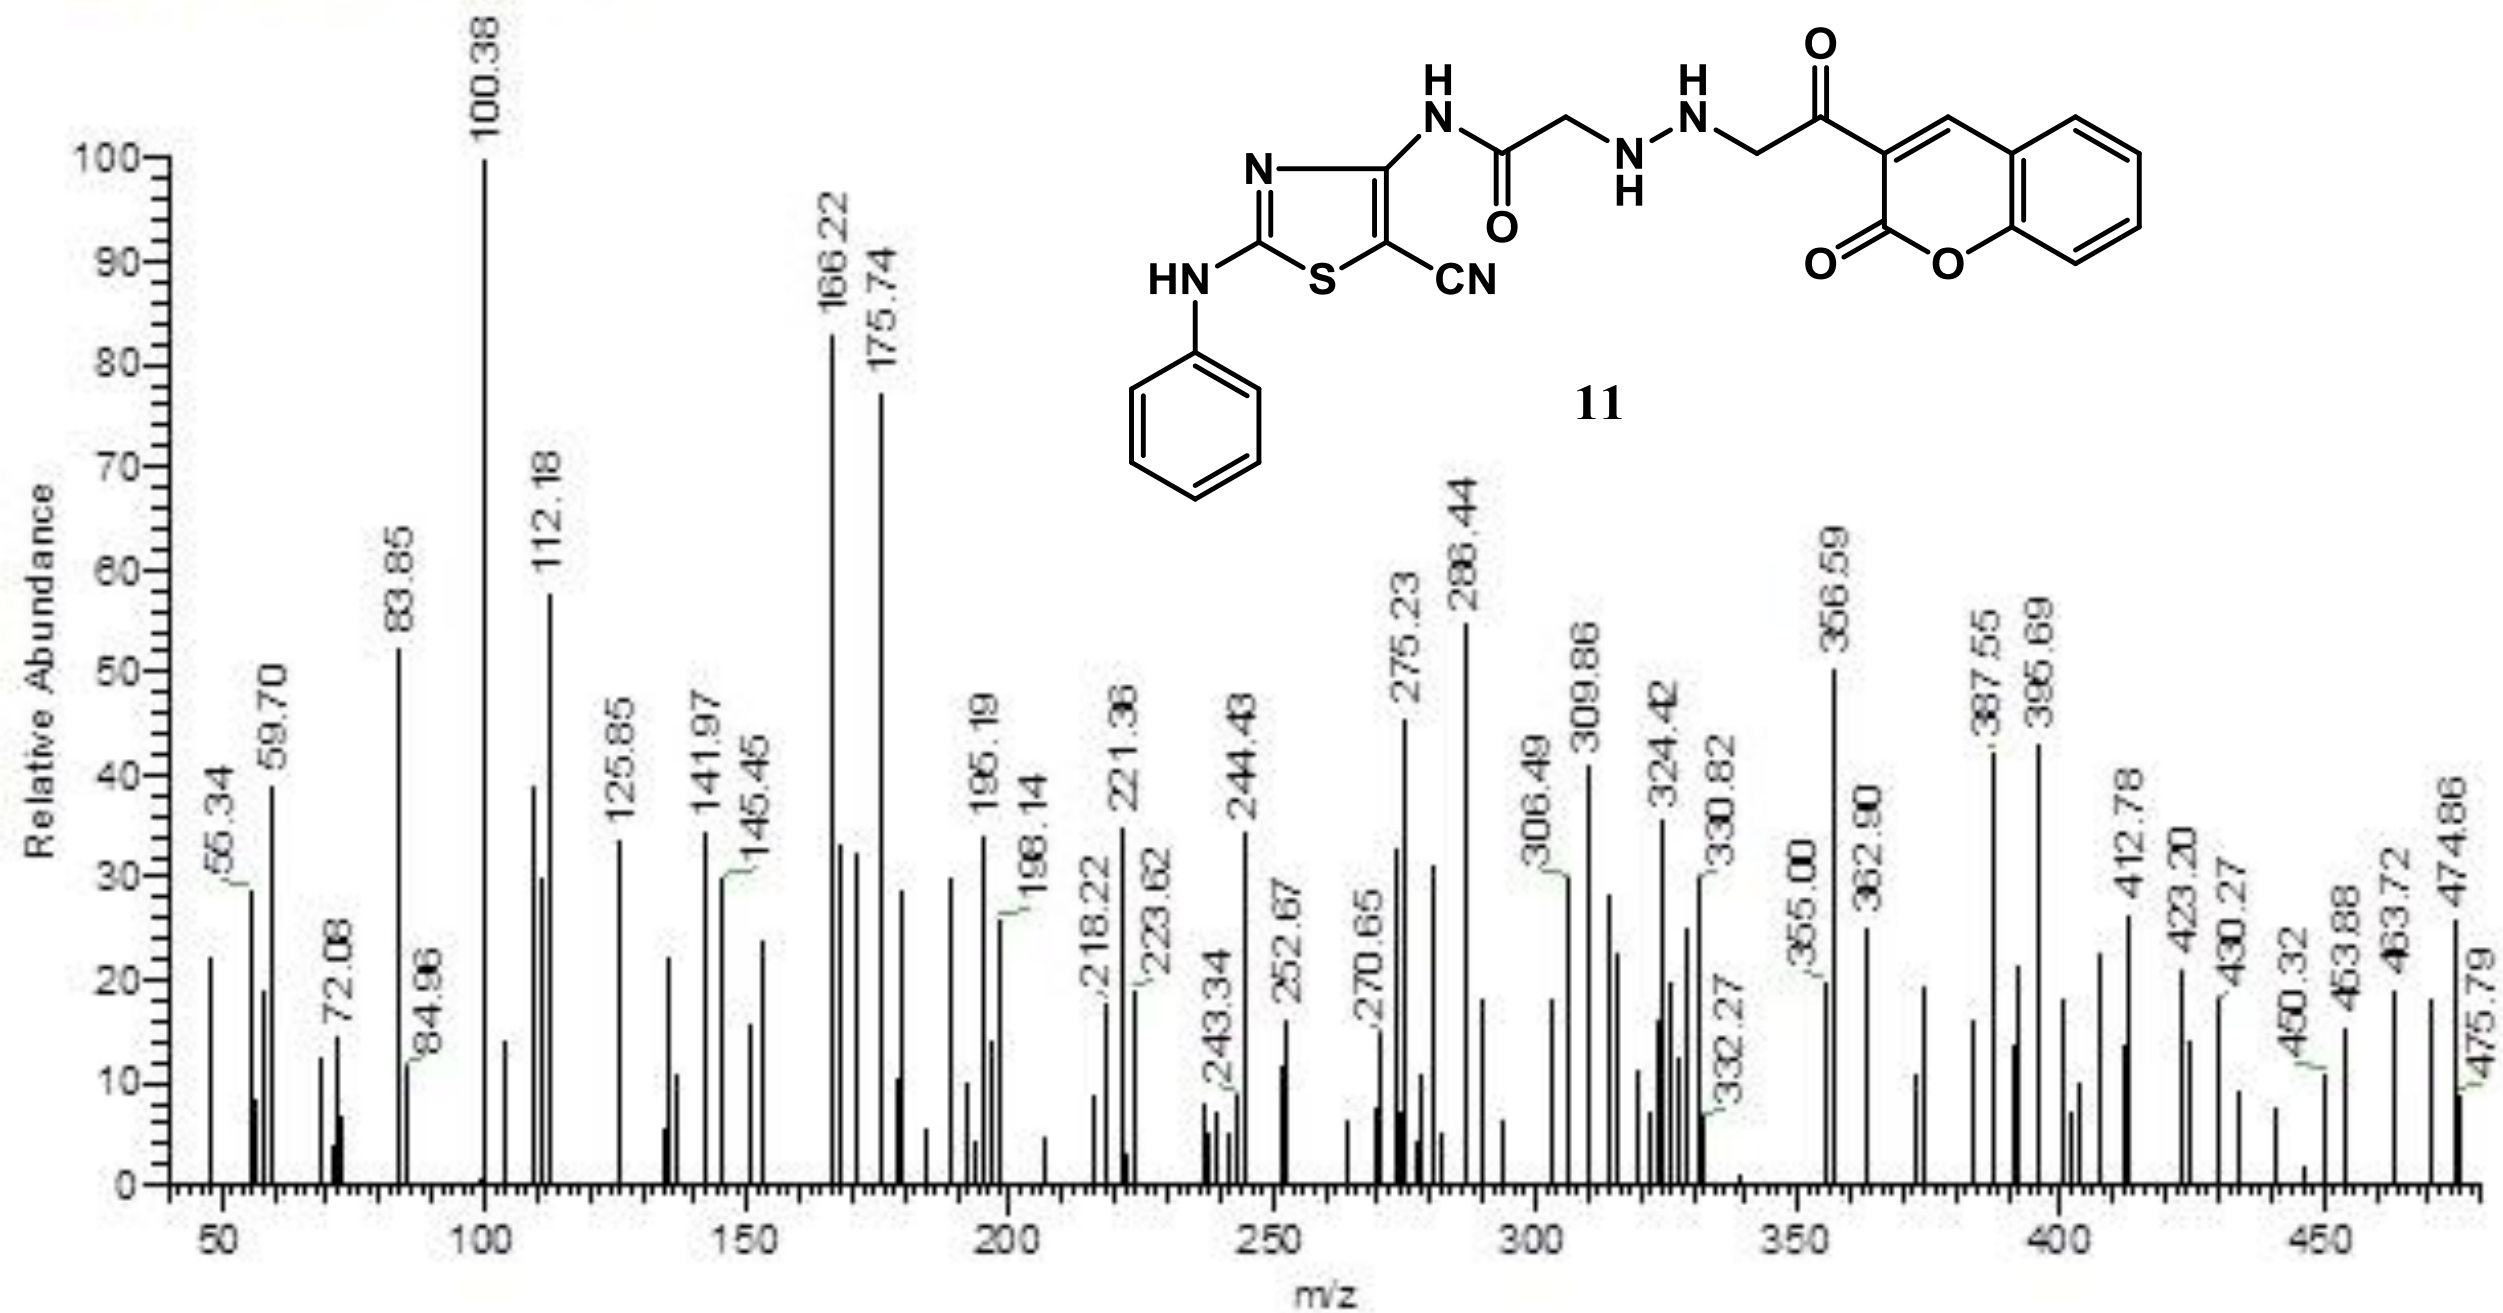

Alaa Abdullah-22-HNMR-DMSO-AF

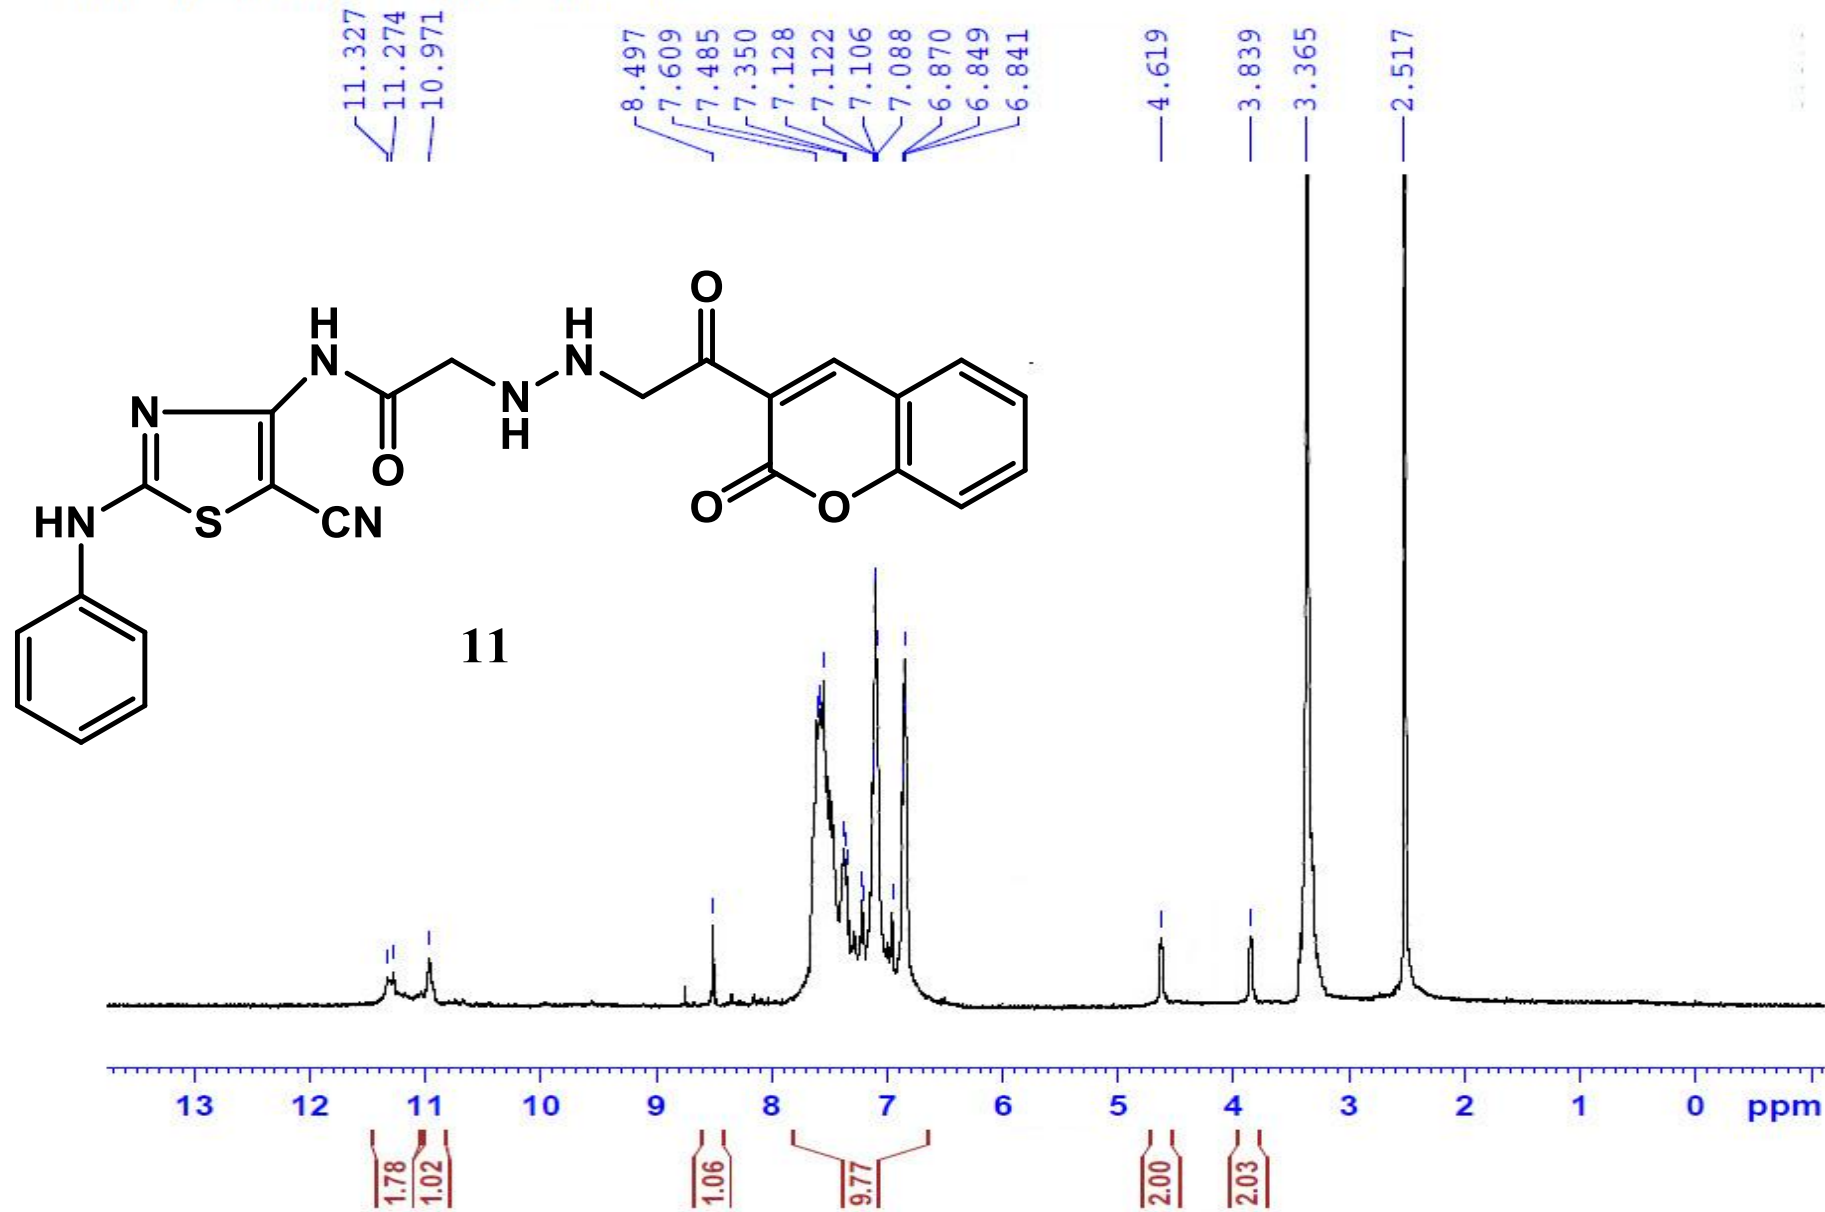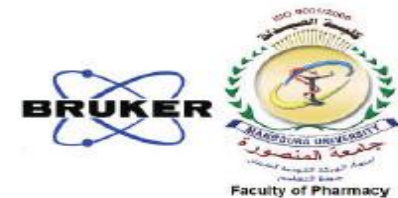

Current Data Parameters  
NAME Alaa Abdullah-22-HNMF  
EXPNO 10  
PROCNO 1

F2 - Acquisition Parameters  
Date\_ 20220510  
Time\_ 15.19 h  
INSTRUM spect  
PROBHD Z108618\_0945 (zg30)  
PULPROG zg30  
TD 65536  
SOLVENT DMSO  
NS 16  
DS 2  
SWH 8012.820 Hz  
FIDRES 0.244532 Hz  
AQ 4.0894465 sec  
RG 135.42  
DW 62.400 usec  
DE 6.50 usec  
TE 295.5 K  
D1 1.00000000 sec  
TDO 1  
SFO1 400.2024712 MHz  
NUC1 1H  
P1 13.50 usec  
PLW1 13.00000000 W

F2 - Processing parameters  
SI 65536  
SF 400.2000000 MHz  
WDW EM  
SSB 0  
LB 0.30 Hz  
GB 0  
PC 1.00

alaa abdallah 22 -M c13

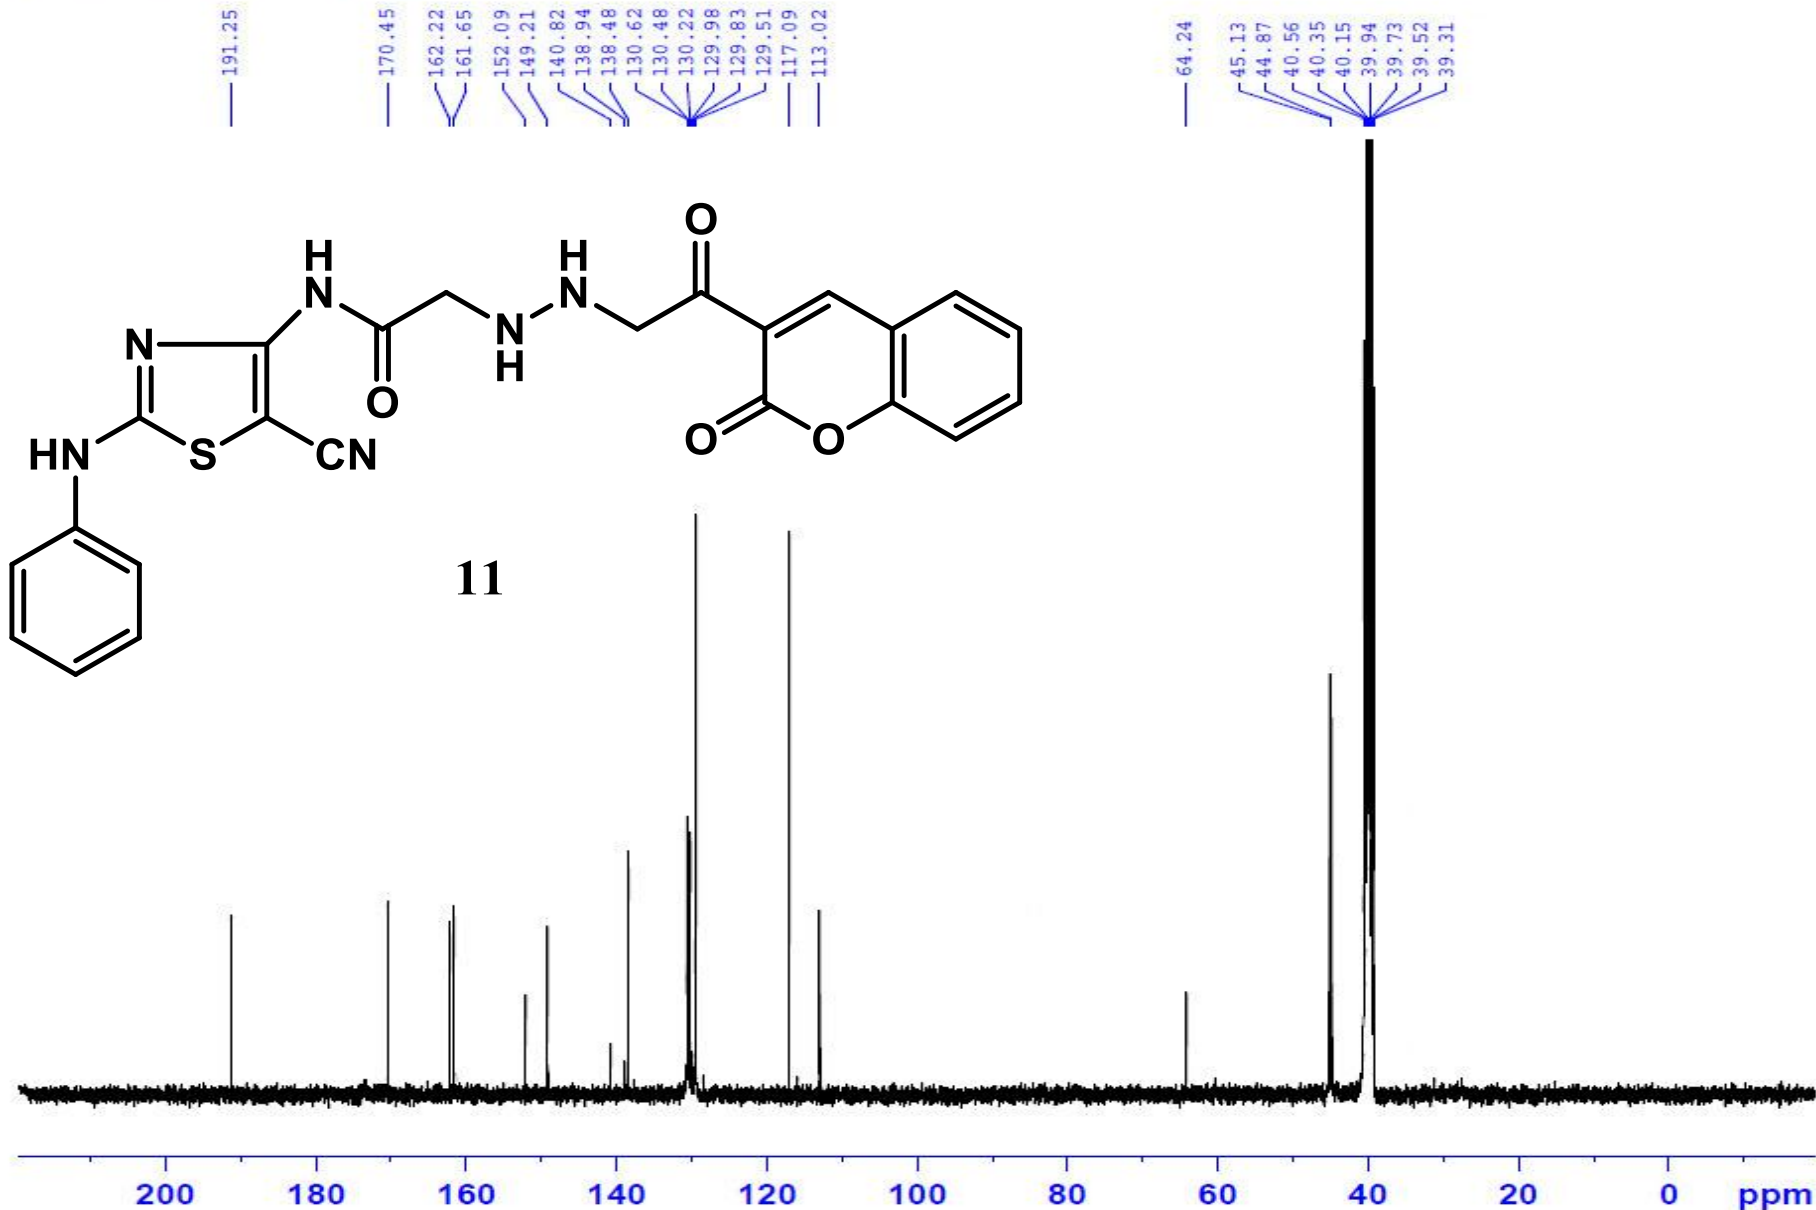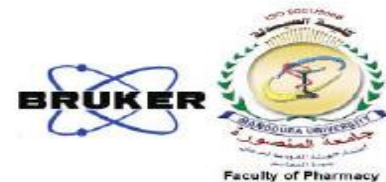

Current Data Parameters  
NAME alaa abdallah clbcl -M c13  
EXPNO 10  
PROCNO 1

F2 - Acquisition Parameters  
Date\_ 20210302  
Time 9.37 h  
INSTRUM spect  
PROBHD Z108618\_0945 (  
PULPROG zgpg30  
TD 65536  
SOLVENT DMSO  
NS 2100  
DS 4  
SWH 24038.461 Hz  
FIDRES 0.733596 Hz  
AQ 1.3631488 sec  
RG 197.77  
DW 20.800 usec  
DE 6.50 usec  
TE 0 K  
D1 2.00000000 sec  
D11 0.03000000 sec  
TD0 1  
SF01 100.6404331 MHz  
NUC1 13C  
P1 10.00 usec  
PLW1 47.00000000 W  
SFO2 400.2016008 MHz  
NUC2 1H  
CPDPRG[2] waltz16  
PCPD2 90.00 usec  
PLW2 13.00000000 W  
PLW12 0.29249999 W  
PLW13 0.14713000 W

F2 - Processing parameters  
SI 32768  
SF 100.6303700 MHz  
WDW EM  
SSB 0  
LB 1.00 Hz  
GB 0  
PC 1.40
